# Supplementary material for: A limited set of transcriptional programs define major cell types
Source: HighWire-hosted journal article supplement (doi:10.1101/gr.263186.120), 2020-07-01
Supplement: Supplemental_table_S2.xlsx [file Supplemental_table_S2.xlsx]

## Sheet: README
Table S2: Gene expression matrix of expected read counts after npIDR

## Sheet: Table_S2
gene_id	ENCLB311NPN	ENCLB555ARM	ENCLB555ALW	ENCLB555AMU	ENCLB003ZZZ	ENCLB594YLU	ENCLB001ZZZ	ENCLB088PVJ	ENCLB555APQ	ENCLB473OOB	ENCLB779RPP	ENCLB023ZZZ	ENCLB018ZZZ	ENCLB002ZZZ	ENCLB335CWF	ENCLB014ZZZ	ENCLB193IVT	ENCLB015ZZZ	ENCLB555AWF	ENCLB905CHP	ENCLB011ZZZ	ENCLB303ZZZ	ENCLB915CSO	ENCLB608FPN	ENCLB555ASX	ENCLB006ZZZ	ENCLB555ARL	ENCLB785VXK	ENCLB013ZZZ	ENCLB799ASI	ENCLB459IUG	ENCLB030ZZZ	ENCLB555AOS	ENCLB555ALE	ENCLB755HPY	ENCLB007ZZZ	ENCLB024PXV	ENCLB260JQO	ENCLB028ZZZ	ENCLB301ZZZ	ENCLB295ZZZ	ENCLB020ZZZ	ENCLB034ZZZ	ENCLB016ZZZ	ENCLB033ZZZ	ENCLB151QMJ	ENCLB555ASC	ENCLB922RHX	ENCLB555AXA
ENSG00000000003.10	2128	2186	2797	988	3340	1029	1257	1609	2012	1378	2598	1481	15868	6592	2675	5409	4444	2937	1675	1742	5709	2291	1519	1415	2628	1216	2497	1378	3481	1555	3185	2668	1093	2085	2282	1388	2750	2600	2997	2281	11339	6605	3152	4670	1843	1646	1090	2147	3425
ENSG00000000005.5	0	0	0	0	3	1	0	0	0	0	0	0	0	0	0	0	0	0	18	0	0	0	3	0	1	0	0	0	0	0	0	0	0	196	0	0	0	0	0	0	0	0	0	3	0	0	88	0	0
ENSG00000000419.8	2635	1664	1680	1007	1879	938	1644	1163	4040	2063	1768	3414	2983	1668	850	2865	2380	3707	799	1385	2972	1263	1000	771	2131	2570	916	2626	2606	1158	2336	2328	1544	1383	1943	2929	2244	2275	1957	3411	1811	3036	2824	2838	3983	1702	846	1523	2409
ENSG00000000457.9	551	730	1195	876	880	639	1049	1170	1033	482	633	1265	2088	1060	835	1093	488	1125	665	580	901	1457	525	398	1246	679	623	719	1022	531	1110	504	789	1538	871	1412	731	777	1603	2034	1176	1459	1802	1348	1642	464	964	653	1731
ENSG00000000460.12	1208	779	793	887	1071	133	739	215	1003	831	398	190	640	825	212	334	1815	1434	77	166	1300	203	171	239	475	156	306	1150	481	180	328	511	660	429	984	185	1947	2052	294	1252	240	1454	617	1196	2241	289	164	270	743
ENSG00000000938.8	38	11	0	0	58	0	2	0	0	0	32	7	36	6	4	4	2	0	0	0	3	7	1	0	6	23	4	0	0	8	1	11	1	10	2	10	0	0	3	9	12	20	0	65	0	0	30	0	0
ENSG00000000971.11	508	3646.06	10031.9	275	2596	32889.87	55604.88	12451	2895	3137	116	4393	3381	1631	15978	40084.79	304	10152.87	20648.7	115	7138	19274.59	50156.45	1014	16821.5	2873	6654	14371	51645.55	85636.33	74	4455	2339	2945.29	7365	4758.95	116	803	21865.92	16595	4213	1691	7807.62	8705	6962	84601.96	1998	42818.82	32450.34
ENSG00000001036.9	7178.02	2633	3879	2110	3394	2360	3916	2834	4949	1833	4285	2311	4953	2484	4326	3444	4414	3956	2188	4456	3347	4926	2640	2438.98	5888	2734	1603	8733	3507	3831	6054	2156	4116	3794	5989	1953	5380	9524	4876	11809	2391	6371	3822	4998	6044	4390	2018	5893	6762
ENSG00000001084.6	1362	1612	3028	2414	1556	667	1291	2579	1446	8127	1391	17089	5228	2686	1384	1944	2005	1504	1309	980	2601	2259	1085	1199	2603	7663	1584	4816	1066	648	2136	1227	658	1592	2803	8214	1342	1493	3955	2359	3463	3810	14173	3657	9869	579	936	1067	6318
ENSG00000001167.10	1392	1846	1174	1039	1640	635	1613	1791	2324	952	3382	4414	4891	3989	2685	1468	1220	3983	419	1544	3704	1457	951	1913	1302	2221	1165	931	3228	765	3784	834	682	1278	2010	2802	2234	2492	1578	2479	1804	3391	2465	3476	3108	791	832	861	1898
ENSG00000001460.13	567	184	497	785	207	125	167	321	256	562	947	407	236	181	584	373	936	336	146	246	170	301	31	241	587	310	169	1039	235	120	660	119	180	465	330	473	615	304	269	438	176	328	292	183	415	243	488	210	646
ENSG00000001461.12	2305	1124	8692	3907	2091	1168	3386	1845	2496	4609	4035	3496	3891	3518	5397	9277	3605	10965	2459	1795	2516	7592	1395	1750	5293	3608	1386	5977	4871	1256	5106	1819	1404	5690	3436	2747	2365	2558	4373	8497	3378	3693	5379	4574	3786	1097	8759	1986	7211
ENSG00000001497.12	2955	1405	1200	1558	2179	809	2196	844	2225	3584	2297	2659	2631	2550	1648	1321	2215	4435	789	1647	4485	1248	1267	1395	1202	2580	929	1759	2721	865	2464	1417	1496	1130	1997	2570	3354	2869	1453	2585	1231	3494	1752	3135	3745	1329	711	1321	1200
ENSG00000001561.6	1509	1008	303	0	1249	34	3476	127	3040	49	1378	22	78	896	1195	1614	1424	173	506	514	638	83	86	499	218	35	645	0	193	151	1872	920	1130	146	85	244	1078	514	677	192	96	510	446	1392	414	40	33	229	398
ENSG00000001617.7	19136	3029	19	1	4838	542	641	3508	315	17494	7828	3936	2140	4268	5151	138	5662	237	44	6056	12881	599	615	5284	1164	3607	3636	644	524	1615	8298	4331	90	871	1417	6293	3033	25705	1245	798	869	3218	27	9149	20	682	244	4005	896
ENSG00000001626.10	0	1	24	0	0	0	1	2546	0	0	944	1	1	0	100	8	32	3	0	0	0	0	0	0	0	3	0	4	0	0	1381	0	0	10	15	11	40	0	16	0	0	0	4	2	7	0	3	13	0
ENSG00000001629.5	4565	5133	11218	5364	5475	2797	8532	2592	7266	2762	6715	11873	10533	8240	5687	16486	6251	12880	7303	3846	8887	9774	4892	4641	13682	7213	3919	5841	15167	4352	8848	3805	4720	9659	5360	8170	4559	5209	11042	14193	5932	8802	14135	10178	11941	3073	7495	4578	21871
ENSG00000001630.11	11656.97	10656.68	37784.54	22618.5	16207.25	4855.61	16055.5	3943.91	11542.37	16157.67	9415.82	30693.45	15806.92	9288.99	7106.27	28471	7055.94	21146.16	6600.98	4961.99	11673.09	18586.83	7174.73	4275.99	13079.31	27058.11	3766.75	25687.14	25418.53	13186.42	13828.79	13858.03	24679.63	32260.23	25613.3	20326.4	15214.86	6551.98	42847.41	27453.13	19724.88	38944.92	62430.32	27181.26	38768.26	10638.36	16806.75	18258.83	20269.09
ENSG00000001631.10	1973.54	2183.54	2818.94	1774.55	2291.25	1365.37	2829.75	1551.69	2597.77	1234.82	1100.79	3177.32	4578.22	3386.63	1308.09	4137.79	1662.48	3074.26	2763.46	1578.77	3086.17	3041.77	2185.08	1480.83	3717.54	1855.55	1187.56	1774	2847.09	1557.87	2385.54	1507.26	2020.48	3259.7	1158.71	2483.6	1439.41	2275	3632.59	5152.95	2671.01	3660.76	3810.91	4304.73	3740.74	1796.8	1791.36	2093.93	5280.62
ENSG00000002016.12	430	463	698	406	581	294	783.92	440	686	225	556	891	815.71	923.63	811	1174	174	1146	206	305	974.47	813	309	317	630	793	352	594	910.84	280	529	407	607	803	394	785	402	752	827.17	1034	532.34	524.25	933.27	972	1158	577	443	288	871
ENSG00000002079.8	112	32	0	3	27	0	2	0	0	98	141	18	0	16	0	0	133	1	0	99	144	0	0	4	0	50	17	0	8	0	215	33	0	0	40	13	145	180	0	0	0	20	4	20	42	0	0	0	0
ENSG00000002330.9	2585	1071	1394	1410	2027	1435	1584	2959	2053	3289	2996	2087	1747	1010	3410	1465	3826	1411	735	2777	2418	1950	2461	1726	1322	1564	1104	1758	2811	1713	2892	800	1514	2157	3043	1908	2674	1862	1954	2170	1805	3052	1798	1631	1541	1693	977	4068	1461
ENSG00000002549.8	11641	7233	3511	16836	26159	2809	7605	1568	7775	2911	2663	4173	8165	13765	3482	8415	4144	10716	5497	6103	17790	7177	4074	9563	3976	3687	5187	4694	7392	3892	4564	17763	4133	4701	4173	2612	4863	8212	6478	8631	11681	10101	5378	15622	7761	4574	3030	3684	4376
ENSG00000002586.13	21321	8278	6614	4719	11556	11171	5862	7346	12337	5425	4534	1562	10335	7287	9922	5388	7884	4540	10302	26255	6666	8643	14608	15735	7920	1794	7820	10759	7644	13191	5584	2464	8352	19553	17687	1647	7323	14230	5636	8102	6908	12435	4894	7603	2679	18694	7065	23044	8053
ENSG00000002587.5	322	478	0	12	69	54	320	102	0	284	896	585	545	54	57	26	1574	216	76	195	221	0	126	73	86	262	223	0	414	314	780	5	0	0	3	186	531	284	2	9	277	305	9	184	0	464	12	47	70
ENSG00000002726.15	0	0	0	0	0	0	0	0	0	0	49	22	0	0	0	0	245	0	0	0	0	0	0	0	0	4	0	0	0	0	63	0	0	0	0	225	2	0	0	0	0	0	0	0	0	0	0	0	0
ENSG00000002745.8	0	2	6	0	0	0	7	29	4	0	2	1	0	0	19	4	0	53	11	0	0	52	0	0	5	0	2	6	2	0	2	0	4	2297	0	0	20	0	1	100	0	0	99	0	3	0	408	0	3
ENSG00000002746.10	0	0	71	0	0	0	12	58	307	0	104	0	2	0	87	0	0	0	76	1	0	662	0	0	655	4	0	54	0	0	56	0	300	200	208	0	0	0	70	485	0	1	23	0	6	0	189	60	914
ENSG00000002822.11	2722	1718	2162	4047	2955	920	2400	1092	3130	2545	2569	2431	2680	3624	3143	2399	4423	4980	1645	2037	4914	2160	1073	1819	1144	2888	1586	2971	3462	1671	3804	1702	1629	2413	2532	2713	3749	3316	1789	3249	2420	3474	3324	3367	4520	1637	2094	2083	1337
ENSG00000002834.13	40993	20132	43331	5470	13158	12403	9911	13780	24568	14932	22423	3166	12725	20136	38464	14907	29503	32003	4600	29116	17199	18790	16036	24391	15162	2317	16158	32454	13821	27206	28288	5312	12027	22552	30903	2221	31234	40542	7738	23562	7867	14115	10689	29198	12733	34771	22199	47861.25	16455
ENSG00000002919.10	1141	811	886	802	1051	291	735	505	731	936	1307	1441	1358	1295	1041	782	916	1406	134	820	1623	752	451	876	607	1151	710	851	1308	712	1518	638	412	434	1164	1643	1252	2075	715	740	1230	1746	893	1393	835	543	772	913	749
ENSG00000002933.3	0	0	0	0	0	9	2	333	83	0	605	0	0	4	41	0	192	0	0	0	0	14	6	0	1	23	0	25	0	0	406	0	134	163	2	0	0	0	2072	0	1	0	2	0	3	0	3	214	0
ENSG00000003056.3	8213	5287	8633	15820	8398	2642	11971	4585	9849	6274	11162	16086	14945	12276	5355	13602	8218	21971	4749	5948	12590	8533	4079	4382	6268	17741	3835	6426	14306	5700	16518	6380	5044	4406	7126	14244	8178	7682	12808	10015	10944	13767	12280	9443	13643	4476	3670	8322	6363
ENSG00000003096.9	203	551.32	120.05	64	150.54	132	4153.96	366	486	819	1055	212.71	65	102	2991.18	464.73	8216.03	1099.73	43.25	521.22	2551.4	1928.8	85	285.98	7818.81	219.87	1186.65	573	8149.12	258	1335.76	908.66	273.67	743.95	508	217.26	4781.98	368	1109.42	3563.57	13	122	771.98	1225.1	1134.91	475	99	129	6476.25
ENSG00000003137.4	3308	19	47	9	26	1008	89	11	1186	306	170	103	0	174	39	150	33	52	357	48	144	59	1311	245	56	65	52	34	43	1286	179	6	711	1314	120	11	31	1799	60	10	133	0	23	110	9	1005	708	413	212
ENSG00000003147.13	753	1758	176	408	1966	1	61	25	38	252	1193	681	5148	1781	854	2	1352	13	26	1333	2806	6	5	1325	397	508	1515	40	36	1	1383	898	8	28	175	784	656	1145	9	14	2115	3279	201	2782	44	0	4	3	620
ENSG00000003249.9	301	661	37	672	121	2	160	38	10	575	1752	324	626	1259	1784	135	2782	144	6	789	979	245	0	758	62	82	1436	38	234	27	1972	358	0	127	656	399	2164	232	92	224	1019	1710	54	2235	69	30	78	1	55
ENSG00000003393.10	4060	4323	5780	3441	5073	1571	4528	2145	3594	1945	4348	6395	6880	7502	3969	6650	3612	7848	2354	3199.19	7452	5240	1566	2802	3500	3425	3402	3718	6828	2581	5913	3908	2432	3607	3251	4701	4073	4404	4656	5637	3872	7685	6069	8070	6078	2350	3633	2928	5384
ENSG00000003400.10	4970	4737	684	80	12784	258	1094	94	208	545	167	1452	8111	8656	194	1161	541	1172	181	2982	5222	752	436	3006	42	380	3050	528	1150	931	347	4845	453	539	412	771	84	2856.2	831	1231	7304	14925	476	11109	657	704	596	774	158
ENSG00000003402.15	17189	22223	11580.37	3515.19	23109	3462	10044	2178	8560	4084	8220	10442.94	19511	36711	7638	16781	12179	8894	5210	13677	29577	8989	4728	14160.06	9490	7081	16817.86	3874	7667	4099	11384	15977	6446.78	13916.52	5583.62	10812	5489	11052	9924	7328	16362	23605	8647	21729	6909	4167.54	8216	3699	12595
ENSG00000003436.10	13858	46335	11887	565	13999	21557	42256	25112	36904	336	2873	74	237263	70840	6902	87162	11925	47585	2673	14262	36464	14256	32061	14167	3169	272	59576	12631	11392	49260	3634	26914	28674	7511	24508	57	14359	13868	13015	15818	245440	139809	6588	101880	10355	63913	2914	21865	12316
ENSG00000003509.11	683	458	731	766	766	391	871	746	886	595	703	1383	1492	995	911	1420	680	1008	484	453	1094	804	442	396	848	1231	461	969	1075	393	729	677	720	896	542	1077	766	795	1284	1466	499	1242	1436	884	1478	351	427	624	932
ENSG00000003756.12	5439.96	9438.93	11372	7651	10074	3629.81	9178.69	5248	8107	2760	5798	8252.53	23200.42	19441	5601	7842	4383	10027	3013	4120.86	13725	9309	4336	6186	8483.92	6527.73	6178.88	5364	10942	3632	7070	5181	7184	11280	4078	7177	3883	6582	13058	14446.46	12305.88	15391.77	11074	15881	12589	6815.97	6757.94	5476.9	11715.92
ENSG00000003987.9	11	33	0	0	18	0	0	0	12	1	284	0	0	9	83	0	186	6	0	0	40	0	1	11	8	0	33	9	2	10	289	31	0	2	72	0	368	4	0	0	1	3	3	18	6	6	0	1	12
ENSG00000003989.12	1905	7771	2894	3444	1360	1957	324	10809	1608	302	1278	359	564	2268	1949	4660	2539	5266	1325	643	7185	234	2504	2191	6376	1728	10701	9225	892	9347	2312	2924	411	75	21514	183	2619	4830	3358	193	1741	480	4036	2264	1632	9565	17	3095	6423
ENSG00000004059.6	5818.76	3388.64	1836.51	2660.9	7798.04	3447.84	3670.93	4881.51	4187.58	7913.13	7190.46	4558.67	9537.59	3995.69	11381.22	4015.42	7380.32	5260.78	711.85	5017.96	7482.44	3670.16	5357.91	3744.82	3087.98	5690.71	3335.61	6278	7216.21	4417.58	8826.15	2594.29	2766.1	3605.32	9017.47	8079.9	7388.36	5158.96	4023.1	5506.38	5282.55	12340.91	4179.21	4857.87	5168.81	5600.67	2630.29	8205.03	3353.27
ENSG00000004139.9	782.76	610.42	2570.43	1893	381.46	1164	1152.74	1556	991.61	28	1423	65.35	1034.74	1408.89	2338	1070.51	289.74	1455.94	697	705	1048.65	1547.93	1024	604	1744.44	36.61	635	553	801.33	1218	1813	487.34	1047.25	2107.36	1149	40.92	123.98	296	891.71	1097.14	816	738.11	1432.2	733.04	1025.11	1004	2056.5	2601	2086
ENSG00000004142.7	7072	4674	4974	4289	4828	2382	4187	4133	7832	5646	6408	5557	6418	3886	9707	4942	6461	9246	408	3704	7787	6591	4115	3178	4461	3993	3661	9580	6570	4300	7467	2535	4507	3991	8600	4612	8712	9649	5307	7225	4202	8927	5305	7198	6273	4119	3925	5506	4942
ENSG00000004399.8	37523	54998	7457	1009	44200	22177	8789	11370	6867	134	12484	40	62859	61353	47205	14380	2727	11342	2319	73773.91	45230	10656	24983	127837.35	3381	109	51511	4459	14596	9981	13074	9594	6920	19339	6520	96	2695	19179	5728	12303	12377	42496	7799	112910	5267	13133	13663	14962	4357
ENSG00000004455.12	8453.21	7433.37	4286.23	5644.53	6192.94	3052.88	4934.2	5530.49	14982.47	9263.85	5411.06	5757.39	9151.72	6672.9	6248.47	8333.5	10678.55	12417.86	4619.04	5670.3	9260.84	3563.32	4557.32	4044.95	5635.85	7326.7	5211.56	7280.78	7621.09	5501.5	7417.14	5001.14	4874.12	4388.99	9314.14	5542.89	10716.33	9915.59	4542.84	7407.46	5812.41	10588.48	8562.05	8738.8	9535.84	6837.94	3280.69	6020.03	6193.25
ENSG00000004468.8	386	43	3	103	5	18	3	0	23	0	1	2	2962	808	78	4	0	15	30	464	20	3	26	131	32	1	42	0	2	12	9	2	2	6	184	2	0	9	5	0	2269	1256	0	3679	1	2	0	0	28
ENSG00000004478.5	5725	4208	4599	3809	5962	1672	4482	2296	8053	9069	4429	12040	6288	7824	4006	9798	6515	23737	1746	3089	12038	4839	2137	2397	1386	10288	3077	4932	6823	2235	5432	6466	3605	1138	5502	8697	10690	5950	5716	4548	7039	7635	9014	10748	12565	2778	1190	3178	2037
ENSG00000004487.11	7571	10210	9706	5488	9773	3520	6361	6795	11111	10361	10748	8169	16228	9634	9691	9786	11325	14527	5407	6638	20670	9452	4472	5503	7605	5341	8614	8305	16921	4666	12599	7623	7199	7186	12593	6157	13772	10033.98	8442	11868	8766	17762	9827	14290	11851	4901	5423	7428	9487
ENSG00000004534.10	2443.04	2554.07	3700	1912	2668	1160.19	3936.31	2742	2770	2825	3027	3625.47	5125.58	5278	2176	4564	3839	4595	3618	2796.14	5038	2970	1859	3361	3258.08	3178.27	2268.12	2224	4498	1333	3824	2077	2310	3183	2197	3729	2637	2138	3943	5041.54	3797.12	3711.23	5276	3728	5403	2161.03	2178.06	3189.1	4445.08
ENSG00000004660.10	445	270	239	151	365	273	1255	96	1517	736	1055	207	218	274	1943	681	935	411	533	356	564	987	358	293	584	400	247	511	428	302	1031	208	1065	1324	442	333	734	363	259	538	124	144	2945	117	3584	501	237	355	737
ENSG00000004700.11	8168	7659	7679	5214	10733	1546	9794	2919	16220	2777	3320	3178	18004	14002	2656	8876	3255	18911	2466	2261	13596	4988	2444	2958	7246	4335	4131	9998	8762	3131	4539	7792	6587	4929	7194	3396	3772	9065.95	7726	13687	9394	19136	12220	18524	24714	3142	2630	3687	12880
ENSG00000004766.11	2212	2018	3455	2041	3569	482	3077	1101	2477	932	1847	3762	6084	4682	1237	5347	1910	4033	2105	1070	4366	3109	822	896	2231	2545	1247	1776	3177	725	2305	2142	1768	2928	1147	3272	1378	1845	4909	5352	3693	5586	4545	5441	4916	857	1681	1106	3596
ENSG00000004776.7	6	11	778	61	30	4862	2402	2308	4188	0	30	4	9	14	352	4912	83	2183	9415	61	7	12913	5360	88	1851	59	15	1074	824	387	7	74	1809	1138	587	4	6	0	2449	6361	8	12	7996	64	2422	1321	418	6580	1506
ENSG00000004777.14	217	145	114	107	167	59	163	101	277	111	47	0	77	171	237	117	531	250	56	42	109	288	27	124	71	3	110	335	107	35	102	87	249	296	182	0	193	27	70	579	74	119	327	227	552	152	93	208	138
ENSG00000004779.5	3546.53	1377	1477	1421	2417	516	1129	1716	3162	3147	943	2588	4283	1740	2156	972	1739	2113	963	1404	3792	550	359	1000	741	2153	1064	2661	2212	1087	2206	1198	1157	689	2696	1967	2289	2311	1615	1393	4024	7787	1662	1759	1841	1134	333	1687	1123
ENSG00000004799.7	284	909	13	185	2984	8020	6753	8365	682	24	50	13	15591	6525	247	855	70	95	280	212	709	78	13298	537	178	47	699	6	20	3500	55	546	400	271	172	63	38	612	429	43	25136	13352	11	12925	4	11315	28	867	1113
ENSG00000004809.9	0	2	0	0	0	23	0	0	0	0	1	0	0	1	39	0	0	3	0	0	0	0	9	0	0	0	0	43	0	24	23	1	0	14	0	0	6	43	5	4	0	0	2	0	9	0	6	0	2
ENSG00000004838.9	0	4	18	35	9	5	100	37	12	144	1	7	4	12	136	38	14	25	13	18	24	54	11	3	77	11	0	96	54	0	26	7	6	124	40	9	40	0	28	134	5	4	56	4	90	3	46	45	137
ENSG00000004846.12	0	0	7	19154	0	0	0	0	0	0	0	0	0	0	14	7	0	0	93	0	0	3	0	0	0	0	0	0	0	0	14	0	2	0	0	0	0	0	20	0	0	1	35	0	7	0	0	0	3
ENSG00000004848.6	0	0	0	0	0	0	0	0	11	0	0	0	0	0	0	0	0	0	0	0	0	0	0	0	0	0	0	0	0	0	0	0	0	0	0	0	0	0	0	0	0	0	0	0	0	0	0	0	0
ENSG00000004864.9	3728	2799	1407	3894	2462	727	952	368	3580	2003	2856	1398	5023	3041	3390	970	4310	1604	596	2127	3823	655	906	2438	1504	1565	1531	1111	1296	1096	4500	1597	1103	583	2084	1416	4430	4225	779	1269	2831	4557	866	4259	1788	770	494	2092	2171
ENSG00000004866.14	1378	1422.31	1610	14659.99	873	559	911.15	645	1315	535	979	1016.07	1326.92	1247.13	844	1677.43	749	1804	281	1157	1667.04	1103	752	1023	988.05	640	1132	1748	1064.19	511	1066	802.19	801	897	1574	726.83	976	1602	1056	1854	908.44	1513.17	1252	1440	1512	546	949	1047	1101
ENSG00000004897.7	12269	14302	14510	7712	11906	3608	11454.97	4968	13992	5052	5221	8494	22274	10441.97	4079	12237	5263	19440	2171	6960	19833	9140	5793	5520	13399	5801	8310	8724	12191	5790	6430	7048	9868.99	9682	10618	5244	7540	13554	9093	16299	12862	22861.99	11726.97	21876	17313	4527	9137	5156	16744
ENSG00000004939.9	0	0	0	0	0	0	0	0	0	0	0	0	2	0	0	0	0	0	0	0	0	0	0	0	0	0	0	0	0	0	0	0	0	0	0	0	0	0	0	0	0	0	0	0	0	0	0	0	0
ENSG00000004948.9	0	0	0	6	0	0	0	0	0	0	0	0	0	0	0	0	0	0	0	0	0	0	0	0	0	0	0	0	0	0	1	0	0	0	9	0	0	0	0	0	0	0	2	0	0	0	0	0	0
ENSG00000004961.10	1008	960	1727	720	1000	258	1154	405	1139	768	849	1423	1435	1261	517	1447	935	3099	157	473	2230	926	262	665	945	1202	632	822	1530	539	991	1062	502	569	876	1162	917	1108	1123	965	1093	1584	1087	1113	1265	590	734	495	1263
ENSG00000004975.7	3177	2317	4661	4363	1923	1890	3414	2860	2575	2816	3967	4845	3043	2568	5912	3816	3513	4239	1619	2211	2600	6348	2065	1557	2781	3314	1748	4197	4437	2081	4643	1251	2885	4686	4409	3072	4507	2349	6231	6228	2273	3605	6443	3591	6175	1958	4277	4770	3034
ENSG00000005001.5	0	0	0	0	0	0	0	13	0	816	1951	306	0	0	36	0	407	3	0	11	0	0	0	2	0	322	0	0	0	0	2328	0	0	0	71	667	283	0	0	0	0	0	5	0	60	0	0	0	0
ENSG00000005007.8	7564	7299	6211	3552	8371	5570	8467	10132	10275	9293	9929	14657	12964	15386	11558	7867	8869	10645	1335	6319	13798	12282	7129	7346	5716	8936	7128	5953	11729	6518	11860	4781	4966	9189	8341	10685	9815	6566	7127	10552	9904	12867	11039	18267	11084	4630	5662	6739.01	7130
ENSG00000005020.8	4842.02	2637	1248	681	1775	440	149	3772	2539	424	2417	643	3238	3702	2054	361	4706	498	1321	3465	1637	1215	504	2436	248	284	1752	3309	367	447	3743	560	1962	280	4719	464	2586	2310	2661	2421	2279	2627	927	4822	958	387	635	797.1	516
ENSG00000005022.5	23241.97	8300	4316	5975	10753	3951	6034	10212	11401	18052	10556	17364	13926	7290	15480	5346	11880	21449	792	9924	17230	4815	5758	6488	5131	21111	7079	14353	12974	5527	10916	5028	7112	6575	24833	19641	31242	19564	5339	10137	7476	20918	7796	13802	13855	6122	3096	9090	5489
ENSG00000005059.11	2303	2319	533	346	3713	401	1349	420	1670	1219	739	446	7775	3159	2042	1785	2450	3087	700	1831	3971	1485	414	934	2135	357	1783	1018	2299	937	1078	2195	2022	2320	1569	407	2453	1794	1728	3563	3352	8480	1751	6906	2562	1034	1074	1091	2159
ENSG00000005073.5	313	69	3021	5	42	0	0	0	336	0	723	0	8	24	2260	4	840	0	0	267	6	5	0	92	904	0	131	2007	0	0	1379	426	296	0	0	0	940	550	0	2	0	13	1453	60	1068	0	0	331	1400
ENSG00000005075.11	947.02	647.38	551.05	535.16	879.75	305.73	1118.14	766.23	1079.12	455.08	925.12	985.38	1048.8	482.64	1422.66	484.55	686.67	1027.07	33.52	1020	1048.78	569.97	431	708.03	555	577.81	739.88	215.47	1254.97	555.04	930.4	226.29	563.81	509.27	820.85	1159.94	851.79	152	732.86	601.27	809.82	1359.24	420.11	541.75	469.71	323	221.4	587.91	449.5
ENSG00000005100.8	2072	3223	2073	3588	1868	1270	1299	1414	4118	1464	2649	3133	3630	3259	2651	1233	1691	2821	650	1606	3759	1778	1142	1667	1419	1800	2209	1090	2438	834	3530	1237	2226	1786	1833	1596	2149	3251	1659	2111	2055	3350	2104	4353	2668	600	1249	686	1829
ENSG00000005102.8	583	1	362	0	918	7	0	0	0	0	19	17	7	2155	0	259	2	2	0	0	0	0	2	103	7	0	6	0	99	0	100	0	0	6	15	1	0	0	2	0	0	64	4	3	2	17	1	0	12
ENSG00000005108.11	1225	9621	138	160	9978	203	205	156	17	1	8759	23	18533	8162	613	262	803	205	90	4017	18965	50	285	7603.98	19	100	8564	252	92	420	11725	3434	24	398	101	113	372	960	35	474	7670	12104	212	14984	178	1052	128	77	101
ENSG00000005156.7	2515	2067	3831	2144	1829	616	2178	932	2222	1910	2823	3877	3006	3443	3518	2335	3692	4629	468	1139	3263	2806	1075	1639	2091	3083	1941	3761	4004	779	3405	1738	1476	2239	3360	2870	4450	2918	2265	3526	2275	3089	4757	3461	6169	986	2084	1466	2430
ENSG00000005175.5	1250	1062	1759	833	902	395	1537	885	1616	1221	1102	1342	1925	1057	587	1498	1861	2772	656	809	1850	887	971	748	1267	784	516	1402	1476	483	1676	873	869	1327	1462	906	1642	1011	1205	1884	842	1591	2042	1954	2557	642	704	1131	1861
ENSG00000005187.7	5	88	32	20	11	156	32	76	30	20	246	86	0	31	774	112	133	32	6	269	126	73	305	714	32	64	845	119	40	35	191	7	25	41	24	208	109	0	99	25	1	7	52	9	35	70	28	62	93
ENSG00000005189.15	237	190	322	244	430	157	588	146	430	273	61	112	272	163	82	222	532	776	115	104	288	338	175	146	482	100	202	783	341	162	156	227	433	657	296	134	361	289	224	1077	94	311	438	310	1331	156	291	96	614
ENSG00000005194.10	4213.99	3562	2878	3586	4438	792	2359	1812	3695	2820	3797	4436.54	5680	5032	3722	2272	3020	3162	1156	2375	6507	2021	1099	1923	1659	3713	2590	1947	3698	1271	4652	2731	1882	1463	2943	4177	3943	4494	2491	2451	4298	7516	2026	5468	2995	1255	941	1983	1899
ENSG00000005206.12	2035	1059	1200	1073	903	1493	1151	2203	1325	1330	2274	614	1932	2072	6053	1398	2350	1281	1074	1802	1496	2192	1570	2239	1144	469	1396	2511	1508	2053	2525	599	1206	1598	1836	695	1679	2313	1149	1964	1768	1596	2070	1994	1630	3260	1099	3116	1360
ENSG00000005238.15	4901	3491	1525	2076	1670	855	2867	1592	3399	2570	3432	1662	818	1585	3041	2405	2170	2957	801	4192	3068	2008	909	2762	1832	697	2337	1323	3346	2161	3817	526	882	1919	2406	1078	1376.9	3471	1001	2390	730	1192	2667	2117	1725	1963	2256	2474	1883
ENSG00000005243.5	268	91	1050	192	299	606	3083	441	1258	45	51	209	333	222	421	1098	123	1725	3248	181	197	1281	662	169	2916	140	61	1065	2901	791	89	75	761	1795	1030	457	46	352	1063	1123	96	212	1462	89	777	672	1080	1684	3336
ENSG00000005249.8	8268	4383	422	1198	6818	800	499	4964	90	0	458	0	3533	2399	558	111	721	244	450	2884	12928	743	1272	1948	253	29	1525	1377	17	129	528	5768	99	545	1263	2	540	13158.29	1938	975	2977	5482	2297	9105	3541	51	43	568	958
ENSG00000005302.13	2857	3810	2046	1275	2728	755	1285	772	2103	1360	1755	1137	2519	2163	1029	1313	1868	2073	917	2151	5703	1180	1164	1490	1335	919	2086	2064	2228	1009	2433	1573	1459	1217	1995	1366	1869	2306	1138	1645	1405	2963	1530	3194	1764	1427	1004	1197	1737
ENSG00000005339.8	5405	4453	4036	3098	3089	7368	2247	7775	3576	2280	9821	3225	5025	6209	11448	2922	3437	3056	960	7256	3983	4990	8014	8711	5789	1894	4143	3113	3027	3763	9777	1299	3033	6489	4987	2205	4169.99	3832	3504	6227	4064	4357	4592	7326	3893	3893	5162	5680	6127
ENSG00000005379.11	0	0	65	132	0	14	2	373	0	0	1084	21	5	3	1940	11	392	2	118	4	0	56	5	6	269	39	0	15	4	45	1309	0	3	440	84	10	107	0	604	46	7	0	346	7	76	1	71	7	117
ENSG00000005381.6	0	9	0	3	0	6	3	4	0	0	44	0	0	3	22	9	0	8	0	19	0	10	0	7	23	0	0	0	5	0	9	0	11	3	3	0	0	0	1	12	0	1	0	2	0	0	0	0	7
ENSG00000005421.4	0	0	0	6	3	0	0	0	0	0	0	0	0	0	3	0	0	0	0	0	0	0	0	0	1	0	0	0	0	0	0	0	0	0	0	0	0	0	0	0	0	0	0	0	0	0	0	0	3
ENSG00000005436.9	2092	1385	905	1476	924	473	1121	566	2179	762	1633	1633	3877	1248	1148	969	1173	1834	1177	771	2224	1118	1037	800	1846	999	1366	866	1218	647	2160	929	1143	1649	1481	1352	2028	1974	862	1764	1779	2692	1130	2398	1690	1175	813	1650	1852
ENSG00000005448.12	1062	732	823	813	1796	407	1094	1511	2598	1456	738	692	1917	824	1818	1435	1949	3355	242	860	2397	1155	484	571	471	805	734	1886	1625	743	822	823	2095	1377	3380	1109	1405	840	949	3523	1054	2665	1845	1412	3788	1108	403	968	577
ENSG00000005469.7	454	309	1998	747	383	599	1286	613	1001	1525	538	891	590	413	419	1932	476	1375	1244	596	926	1913	1221	992	1504	695	360	854	1651	841	479	628	634	1006	642	1060	528	621	1937	1888	244	509	1203	470	1156	601	633	433	2534
ENSG00000005471.11	318	0	5	1915	29	0	143	59	0	0	684	0	1	36	1263	36	729	11	0	68	3	476	0	26	56	0	1	1	11	20	739	3	9	1369	386	0	46	89	51	522	1	22	16	23	51	0	816	0	347
ENSG00000005483.15	3798	7067	7635	4448	5650	3375	8309	5607	6139	2491	3385	4800	19195	9350	4512	6564	4214	5916	3462	3444	6641	4170	4219	3818.14	7090	4137	5370	2508	6089	2871	3422	3037	4796	8364	3832	4080	2202	3550	6120	8649	11438	10351	6620	12033	7472	3409	6214	3595	9450
ENSG00000005486.12	1437	1103	958	1620	730	837	749	2305	1232	2467	3518	730	1358	823	4559	1407	2896	846	1106	1542	953	1538	1341	1364	972	580	1150	2673	1263	2102	3670	270	701	1311	3937	1029	2033	1738	692	862	1149	1435	818	1262	770	2076	1129	1938	1325
ENSG00000005513.9	11	46	2	95	30	101	494	74	258	0	113	2	71	164	67	45	0	129	17	22	74	30	113	6	86	3	53	0	81	252	83	17	16	2	19	3	0	0	4	9	95	66	5	48	22	500	0	88	345
ENSG00000005700.10	5420	6071	13517	5926	6633	3107	8932	2600	13714	3682	6776	28700	12389	8542	5340	10491	6158	14135	5655	2938	10266	6723	4398	2930	12770	17527	3783	7552	11218	5337	9687	6419	6682	8670	8112	18034	5328	5907	10114	15368	6524	12698	15097	11060	14427	4246	8194	5144	13932
ENSG00000005801.12	730	1099	1376	667	783	287	688	789	1070	1239	2269	1073	2294	1659	1251	1159	1694	1187	274	1410	1714	1058	657	619	668	1219	958	614	1334	649	3076	610	999	809	788	779	1734	982	1162	1310	1516	1614	1173	1453	986	479	621	678	1069
ENSG00000005810.13	9642	19172	14633	15608	17075	12341	12767	3977	13100	5007	6906	14543	44168	40679	7904	14714	4162	13952	12935	10912	21797	13883	17592	11038	23574	7389	12288	5524	15441	7084	8718	8092	10678	24787	6553	8452	4015	9038	13160	20936	26729	37303	17535	47358	19833	6081	13818	6011	24291
ENSG00000005812.6	4574	4417	5524	2403	7486	2737	6148	3383	5684	3186	3161	6602	14147	8029	3125	6765	2682	6943	3481	2753	7804	5337	4798	2668	6344	5306	3536	4429	5600	3059	4235	3037	4081	7290	4683	4497	3269	3870	6444	9075	8310	11149	6814	10144	8121	3201	5188	4187	8201
ENSG00000005844.13	6	0	0	0	0	0	3	0	0	0	0	1	3	0	1	0	0	0	0	0	0	2	0	0	1	0	0	0	1	2	6	0	1	0	0	0	0	0	1	3	0	0	0	2	2	0	0	0	0
ENSG00000005882.7	1074	559	923	1225	677	1648	929	1929	731	599	793	178	1114	790	4697	790	629	721	251	1111	743	1929	1528	903	1260	62	848	808	1096	1350	793	182	991	3103	1630	148	624	589	1033	902	962	1042	612	1331	332	1445	1562	1842	1767
ENSG00000005884.13	29499	9275	26144	4347	12568	1599	47387	2995	16347	64853	151654	109756	11825	44958	200087	23415	93595	58723	844	33904.78	19832	9399	2000	33905.99	7968	90558	12401	34311	54453	10072	188659	13512	2029	6150	24562	57403	76215.74	31287.02	13233	19948	22629	26071	32011	38393	34638	9803	14166	28351.53	9484
ENSG00000005889.11	5396	4683	11914	4839	4932	2476	5267	5330	6009	2523	3167	6434	18343	8014	4524	11287	2519	9493	3627	3886	8176	6150	3872	3818	8541	4584	3643	6033	6693	3283	3914	6030	6181	11536	3509	6689	2905	6288	6692	8412	6491	14742	14606	9927	15167	2882	11828	3497	17732
ENSG00000005893.11	14376	10012	11557	23382	9007	8131	12922	9095	13249	6548	8831	16833	19144	13504	10447	19650	5599	13569	2444	14486	12024	16932	11940	10349	22831	10001	7361	14610	17128	10216	10802	7259	9252	14777	16368	10869	6558	14660	18067	19933	12263	17327	17487	13788	12882	9852	11508	11324.03	27726
ENSG00000005955.8	2646	2579	4604	1921	3774	1479	4414	2586	2838	2152	3091	6544	5130	5146	2550	4175	2856	4904	3292	2066	5410	3121	2374	2100	3913	5207	1845	1969	4850	1397	3536	2426	2934	4905	2473	6294	2033	1849	5220	6454	3220	4153	5994	4413	6606	1892	2833	2763	4755
ENSG00000005961.13	15	5	6	20	10	1	2	50	6	0	10	5	39	44	13	25	40	0	0	22	17	49	6	15	8	0	15	2	22	0	5	9	7	12	3	3	10	38	20	17	53	44	57	19	15	57	19	35	13
ENSG00000005981.8	0	2	0	8	0	0	0	0	0	0	0	0	0	1	6	0	8	0	0	2	1	0	2	31	1	6	1	0	0	0	0	0	0	0	0	0	0	0	2	0	0	1	2	0	0	0	2	0	5
ENSG00000006007.7	4241	3856	6334	4941	3346	3068	5314	5147	5933	5636	6774	10033	3636	3123	7403	5335	6501.99	6022	1222	3833	5654	6833	3877	2892	5134	10206	3247	5736	4379	3290	8324	2783	2762	5272	6958	10052	8502	6019	5414	6604	2453	4207	4689	5151	4099	2686	3781	5305	6530
ENSG00000006015.13	3251	919	600	1277	2055	1377	1177	986	2086	3466	2139	546	1772	1636	2230	1207	3487	1914	1697	2595	2679	1191	1494	1838	670	540	807	1516	2377	1006	3015	759	1132	1009	2500	1041	2887	1491	980	1561	1303	2229	1392	2015	2003	1078	556	2096	737
ENSG00000006016.6	43	3	0	7	4	2491	11098	196	1303	26	682	2	0	4	177	901	4	1037	109	12	3	1268	3223	1	1814	17	8	134	534	9540	743	0	452	404	176	18	0	49	69	500	0	4	49	2	6	13219	15	11872	1757
ENSG00000006025.7	1235	930	523	553	793	371	480	933	453	543	1338	56	749	882	2500	576	1026	420	163	944	1198	768	470	1009	615	110	964	896	1131	455	1466	432	329	652	796	140	651	1378	467	789	720	857	786	1210	688	647	510	796	630
ENSG00000006042.7	1993	1581	4084	2253	985	3268	3691	5266	2178	1958	2981	514	2857	1396	6454	6014	4293	5393	2951	3266	8081	6947	4171	2394	3724	638	2180	6592	6206	2688	3622	2092	1292	4836	8440	804	4769	4458	6119	4478	3463	3966	5238	1505	3947	3728	2947	4826	4826
ENSG00000006047.8	0	1	0	0	0	6	0	39	11	21	25	6	6	17	39	14	17	0	0	0	2	5	0	1	6	12	42	0	0	0	14	6	0	0	0	135	27	0	2	7	3	20	3	2	4	0	0	0	0
ENSG00000006059.3	0	0	0	0	0	0	0	0	0	0	0	29.65	0	0	0	0	0	0	0	0	0	0	0	0	0	0	0	0	0	0	0	0	0	0	0	4	0	0	0	0	0	0	0	0	0	0	0	0	0
ENSG00000006062.9	593	282	223	202	300	859	201	604	930	777	694	192	356	464	1083	269	986	313	116	557	332	735	1014	605	548	88	193	1254	316	550	629	179	218	388	305	98	1130	689	534	500	275	324	329	610	393	621	874	705	767
ENSG00000006071.7	1	0	0	0	0	0	0	0	0	5	0	0	1	0	0	0	0	0	0	1	0	0	0	0	5	0	0	0	0	0	0	0	0	0	0	0	0	0	0	0	0	0	0	0	0	0	0	0	14
ENSG00000006074.4	0	0	0	119	0	0	2	0	0	0	0	0	1	0	0	0	0	0	0	0	0	0	0	0	0	5	0	0	0	0	0	0	0	0	0	0	0	0	1	0	0	0	0	0	0	0	0	0	0
ENSG00000006075.11	0	0	0	1	0	0	1	0	0	0	20	0	0	0	0	16	25	2	0	0	0	2	0	0	0	0	0	0	0	0	14	0	0	0	0	0	0	0	0	0	0	0	0	0	0	0	1	0	0
ENSG00000006114.11	3025	2593	2806	2729	2184	1877	1433	3048	2198	1244	4391	2028	5117	5871	4157	2408	2404	2987	1603	4132	2625	3079	2464	3538	2614	1081	2262	2813	2510	1492	4256	1363	1338	3345	2764	1291	2392	4045	2797	5522	4042	4314	3936	6431	3320	1540	1625	2001	3500
ENSG00000006116.3	0	0	0	0	0	0	0	0	0	0	0	0	0	0	0	0	0	0	0	0	0	0	0	0	0	0	0	0	0	0	0	0	0	0	0	0	0	0	0	0	0	0	0	0	1	0	0	0	0
ENSG00000006118.10	14674	4423	3326	2647	4515	1023	484	11583	2630	10834	55659	2079	12593	13083	17869	4233	31546.99	1311	880	19335	11146	2175	1666	19140.96	292	1453	6492	2209	6218	6609	70595	2881	555	599	20695	2232	15998.99	10596	2035	882	7288	8180	3844	12296	4137	1706	1140	2839	483
ENSG00000006125.12	20410	21931	13783	9156	15421	9221	11114.99	12335	17079	14233	24860	8936	21834	22270	28307	9139	26162	12998	8136	23167	18967	16407	11948	21623	20806	6342	15906	18395	13006	8729	30257	6927	10772	22242	19564	5105	23879	21687	10136	23840	16008	25051	14954	36605	13149	7890	12793	8423	28094
ENSG00000006128.7	0	0	0	0	0	6	0	0	0	0	1521	5	0	0	0	6	162	0	0	0	0	0	44	0	1	1	0	0	0	0	1852	0	2	0	0	5	26	0	5	0	0	0	30	0	7	114	0	0	0
ENSG00000006194.6	1610	1916	1996	1707	2703	1212	2151	2181	2349	1728	2326	4205	5131	2859	2410	3214	1227	3084	1554	1312	3284	3015	1582	1312	1609	3448	1676	1308	3111	1926	2789	1508	1470	2254	1815	2883	1951.98	2494	3312	2868	3415	3760	3089	3693	2930	2450	2155	2485	2452
ENSG00000006210.6	774	637	1	90	572	288	891	0	0	773	1784	14	33	10988	1843	76	1653	9	27	1175	411	42	345	3768	24	0	1052	38	145	124	2274	210	0	15	135	5	738	113	4	7	303	401	12	454	2	10	0	8	116
ENSG00000006282.15	5954	2743	6021	4072	4124	3679	5249	2135	5961	2861	4408	1447.74	4357	2716	12566	5190	4470	4361	2031	7014.13	4830	9645	5557	4902	4970	1944.82	2035	5151	5653	4417	5344	1194	4598	8051	6848	1505.18	3452	7404	5772	8123	2135	5847.9	7622	3724	5618	5222	3677	6100	7833
ENSG00000006283.13	0	0	78	0	0	367	70	30	201	10	16	0	2	0	120	3	0	14	59	0	0	373	410	1	183	0	0	0	4	16	0	0	122	1582	4	0	0	0	47	201	0	0	37	0	41	0	166	152	286
ENSG00000006327.9	6523	2383	4929	357	2290	1333	8871	535	9004	7252	16331	12822	777	5219	20114	7341	10813	12913	398	4134	6705	3931	1202	3225	2662	16206	2328	5562	15375	4155	16644	2845	2098	1037	10487	11817	18206.99	7199	4565	2687	2009	2544	8883	1424	10808	3274	4029	4153	3496
ENSG00000006377.9	0	0	0	0	0	0	1	0	0	0	0	20	0	0	0	0	0	0	0	0	0	0	0	0	89	0	0	0	0	0	0	0	0	0	0	0	0	0	0	0	0	0	0	0	0	0	0	0	84
ENSG00000006432.11	0	31	86	446	0	5	21	70	40	3678	3563	4700	76	53	4303	43	4094	36	65	495	6	35	1	192	29	3569	77	1737	41	5	4176	5	5	101	743	4361	3915	0	52	56	36	34	561	66	1308	40	324	47	104
ENSG00000006451.3	4759	5627	1601	746	4480	1531	1536	1958	2443	1623	5751	1957	4108	5753	1783	3465	1954	10752	1599	10420	13727	2589	2209	10212	1898	1172	4309	1570	13318	2138	8202	5743	1365	2523	3233	1700	2353	4954	4371	3566	2812	5102	5993	5622	4409	2077	1568	2059	2143
ENSG00000006453.9	333	70	862	1318	235	137	99	411	168	3443	3994	2864	12	47	2392	405	4328	437	67	451	62	470	293	468	1177	2449	48	93	600	129	3703	4	47	96	846	2880	3225	334	396	190	9	59	245	115	154	205	473	220	1552
ENSG00000006459.6	984	1829	586	629	1857	803	1395	893	1177	1817	2632	10504	6855	3580	1001	2816	1045	1622	1156	904	2550	1179	1329	1163	5091	4617	1656	987	1529	937	3763	1230	1017	1676	1379	6154	519	813	2240	997	4531	3339	2614	3175	1538	830	970	1191	5650
ENSG00000006468.9	1026	1114	1346	999	494	922	5662	3649	2320	167	640	49	3492	525	2326	2487	802	2959	376	964	1099	2151	1327	539	228	42	749	2790	1619	773	847	704	2164	5318	4205	9	723	551	2292	8128	1040	2964	2940	1627	4531	711	1118	613	475
ENSG00000006530.11	2190	1992	2419	2680	1493	662	1174	1155	3341	1603	1910	1744	2413	1918	1856	1607	2295	2213	716	1329	2379	1254	924	1249	1748	1260	1752	3025	2110	1316	2783	1077	1585	1941	2406	1653	2341	3039	1398	2309	1444	2786	1980	2704	2328	1074	1156	1306	1903
ENSG00000006534.11	51	20	1465	671	11	750	1985	1979	2155	170	63	80	68	34	4437	1348	199	1147	506	38	5	3085	1078	72	2814	314	59	3150	1622	487	193	0	2018	3627	1392	332	217	11	1957	1545	20	132	2217	67	1210	455	2733	2945	3412
ENSG00000006555.6	0	0	0	3	0	0	1	0	0	1935	523	858	8	0	62	0	435	2	0	1	0	9	0	0	1	845	0	0	0	0	704	0	0	0	35	1456	178	0	0	3	0	0	1	2	0	0	0	0	3
ENSG00000006576.12	2258	1855	16228	1913	1269	1173	3597	1945	3746	1806	1164	1776	3808	1507	1611	4440	1305	5857	1066	924	1933	3222	1618	1232	5053	602	1009	7483	4820	1775	1330	1064	1950	2835	4435	821	2629	3152	2729	4924	1255	3293	4057	2605	5364	2073	2655	2838	6682
ENSG00000006606.4	0	0	7	0	1	0	17	0	0	0	0	3	0	0	4	136	0	37	3	4	0	4	2	0	5	0	0	0	24	2	1	0	4	5	8	0	0	0	15	0	0	0	28	0	18	0	7	0	11
ENSG00000006607.9	2836	4757	4442	17247	3131	2634	4087	2334	6225	5065	2656	4084	8379	5546	4727	4772	4376	7056	1271	3187	5912	6065	3027	2906	5374	2883	3700	2986	5213	4894	3581	2352	4580	13539	3934	3958	6549	3707.56	2727	6085	5256	7253	3609	7563	4088	3719	5982	6385	5231
ENSG00000006611.11	0	0	0	0	0	0	0	0	0	0	34	0	0	0	37	0	51	0	0	0	0	0	0	0	2	0	0	0	0	0	139	0	0	0	0	0	0	0	1	0	0	0	0	0	0	0	0	0	0
ENSG00000006625.13	1412	532	491.13	711	1267.74	814	633.81	963	1483	2377	1127	2635	1787	1100	378	865	1853	1225	643	758	1861.73	452.14	1218	643	632	1782	368	1222	1379.09	784	1294	666	838	335	1016	2292	1874	1442	1260.47	708	959.68	2268	776.14	1385.43	882	830	251	1168	681
ENSG00000006634.3	1513	1300	1534.95	940.97	1238.91	166	687.77	891	1698	1137	651	864.97	840.99	675.75	443	455	2242	2322.94	287	536	1829.49	343.96	283.98	419	865	569	469	1846.93	649.99	287	958	1143.87	1249.98	610	1815	423.96	2469.35	1780.88	708	2104.9	575.98	1635.9	1323.99	1722.76	3138.68	438	290	225	1219
ENSG00000006638.7	848	116	270	0	169	42	251	17	292	0	11	2	223	79	205	94	13	163	16	164	68	205	65	102	296	0	79	264	161	69	4	18	56	380	221	1	44	363	56	246	68	286	121	133	120	268	263	34	394
ENSG00000006652.9	1950	1486	2507	1053	2524	1126	2747	1760	2739	1068	5246	11801	4809	3712	1448	8081	1225	3728	2535	1222	2761	6783	1529	1531	2942	6546	1169	1939	5090	2359	6653	1465	1604	3869	1924	10827	1950	1273	8938	3550	3553	3816	7602	2918	4620	1728	1927	2387	3925
ENSG00000006659.8	0	0	0	0	0	0	0	0	0	0	0	0	0	0	0	0	0	0	0	0	0	0	0	0	0	0	0	0	3	0	0	0	0	0	0	0	0	0	0	0	0	0	0	0	0	0	0	0	0
ENSG00000006695.6	1377	820	1024	989	515	471	621	969	1303	941	1784	1486	1434	928	1599	656	1885	1123	200	814	921	1031	691	746	785	842	718	1261.95	847	464	1772	377	1035	748	1153	915	1650	1708	864	923	897	1212	842	1036	953	496	769	852	1138
ENSG00000006704.6	1388	740	1318	595	497	400	430	1488	762	1734	4124	2615	813	868	7997	487	2866	593	242	1094	1002	1049	452	972	2889	1945	825	2301	1163	524	4532	332	501	900	1655	2743	3133	766	1026	975	728	946	3923	961	3802	460	838	1708	2338
ENSG00000006712.10	2849	1469	1869	1343	2995	1317	4414	1753	2033	2695	1905	2954	2745	2518	2569	2056	4467	5727	1223	1653	4882	2236	1684	1133	1580	2139	1103	2992	4038	1623	2772	1494	1521	1767	2694	4217	4428	3008	3011	2988	1994	3489	2864	2425	4283	1598	1431	2164	2462
ENSG00000006715.11	5475	5661	6609	5644	6544	2225	11220	1859	5293	2083	7049	5412	12572	10208	4503	11361	3541	9305	7356	4271	8966	9992	2920	4068	7736	3513	3539	3696	11051	3025	9233	4247	4059	7623	4280	3568	4212	5649	9960	11843	6867	9275	12661	12133	8669	2600	4734	5282	10598
ENSG00000006740.12	42	20	126	8	4	184	778	79	339	214	806	61	70	41	597	621	759	492	371	103	26	103	143	52	338	83	9	33	34	507	946	17	239	193	304	180	254	21	227	180	37	29	248	54	285	708	167	350	228
ENSG00000006744.14	8539	5473	4597	5605	7418	2137	5931	1490	9488	6168	4963	6349	9288	8228	8694	4666	5634.36	9144	659	4615.01	10726	4931	2278	4475	2519	5470	4231	4733	7125	2981	6827	4510	4369	4468	5909	4817	9222	10713	3109	5673	5697	10620	4973	10356	8616	2640	3411	3478	3375
ENSG00000006747.10	45	57	492	29	24	0	5	0	0	56	702	28	10	5	937	100	682	19	9	46	12	6	0	6	120	45	23	0	123	0	1141	14	6	30	54	41	559	392	0	3	2	29	24	275	5	0	51	0	279
ENSG00000006756.11	2500	2077	1730	1131	2465	1246	1872	1862	1203	1534	3540	1393	4005	4383	7830	2600	1902	1613	562	3403	3455	3739	1397	2789	2166	1175	1936	2142	3037	1084	4659	2065	1106	4756	1127	3550	988	4199	1961	2482	2802	4074	3168	5054	1304	1640	3056	1396	2699
ENSG00000006757.7	550	340	551	585	266	414	460	633	771	1584	665	864	1049	282	1964	511	499	676	84	408	504	398	544	352	403	589	359	877	573	462	1105	268	558	358	746	1756	742	368	686	482	458	1012	611	361	638	635	258	1080	1012
ENSG00000006788.8	0	0	0	0	0	0	0	0	0	0	0	0	0	0	0	0	0	0	0	0	0	2	0	0	0	0	0	0	0	21	0	0	0	0	0	5	0	0	0	0	0	0	2	0	2	0	0	101	0
ENSG00000006831.9	3587	4046	5606	4225	9919	2000	3938	3718	3870	2278	2757	10224	7574	7946	3661	3436	2366	4582	631	2250	6569	3293	2354	2680	3188	5526	2463	3792	5432	3473	3296	3307	2533	3665	4270	8561	3177	3127	4663	6201	5300	10303	5358	9775	5945	3082	2363	2720	3408
ENSG00000006837.7	2	39.03	57.92	28.19	24.19	37	102.75	124	58.6	18.5	156.48	152.07	56.05	23.02	65.05	205.75	11	88.34	34	11	46.82	117.53	34.59	16.02	85.39	81.52	17.01	55	88.63	22.92	242.1	19.15	52.7	116.77	70.97	58.68	24	5.5	162.49	150.11	34.33	39.65	184.44	21.19	91.66	38	64.94	13	140.68
ENSG00000007001.8	0	0	0	0	0	0	0	0	0	0	0	0	0	0	1	6	0	0	0	0	0	3	0	0	3	0	0	0	0	0	0	0	0	0	0	0	0	0	0	0	0	0	0	0	0	0	0	0	4
ENSG00000007038.6	5	17	8	27	11	13	0	1	11	115	42	125	56	57	7	57	109	59	3	1	0	56	0	0	1	138	3	1	5	0	10	0	15	0	82	90	24	30	21	7	11	110	50	74	107	0	0	0	3
ENSG00000007047.10	1532	1607	1016	790	905	1546	549	2848	1327	1822	2179	709	1757	2242	3298	862	1610	883	625	2945	1346	1339	2027	2401	1080	564	1967	1416	1036	998	2369	339	960	1545	2135	917	967	1130	678	1155	2025	1329	830	2520	655	1521	1223	2588	1122
ENSG00000007062.7	0	6	14	166	15	0	0	0	0	0	7512	11	13	17	2463	25	10467	18	0	533	13	0	0	155	0	23	0	23	3	0	9438	19	0	4	2	22	5146	13	8	0	2	4	0	20	7	0	11	8	0
ENSG00000007080.6	3204	645	496	505	1167	1062	1318	1773	965	2102	2487	1860	1408	2077	2009	458	1823	2130	220	1756	2659	876	1109	1550	563	943	485	2361	2370	710	2733	693	634	553	2699	1713	2901	2023	942	1260	1139	1508	1010	1813	1225	1610	323	1396	599
ENSG00000007129.13	118	221	0	0	302	0	0	6	0	0	0	0	689	102	0	17	0	0	0	241	54	1	0	243	0	0	127	0	0	0	0	0	0	0	1	0	0	0	0	0	547	731	0	282	0	0	0	0	0
ENSG00000007168.8	8063	11762	14318	8707	10757	4276	13607	6992	11385	7372	8100	10512	19652	17769	7870	11930	6714	14218	7632	7367	17336.16	11891	6899	6991	15820	11001	7362	4891	16382	6369	10661	7386	7421	17074	8917	12593.25	5890	8619	12863	19850	10583	20471	15603	18097	16084	6131	10575	8182	19642
ENSG00000007171.12	5	7	0	17	0	37	15	1	0	0	1	1	46	115	5	10	3	2	12	46	3	0	23	12	5	4	0	0	0	51	9	0	0	0	20	0	7	0	2	0	37	203	0	92	0	19	0	0	3
ENSG00000007174.13	38	7	0	12	0	0	0	0	0	4	18	12	0	0	2	0	1	0	0	0	8	0	0	0	5	11	0	0	0	0	5	0	10	0	0	28	9	47	1	0	0	3	0	2	6	0	0	0	15
ENSG00000007202.10	30656	30816	27171	19083	28148	9695	37432	6797	35619	14768	19991	34044	38242	38131	24892	30774	18788	48197	6705	22472	45147	31090	12697	16543	25106	22572	22003	20381	27757	13306	24086	13576	20585	26789	20019	22560	23706	31143	22860	28812	31012	47068	28533	52214	27845	10626	21897	14598.07	31685
ENSG00000007216.10	0	0	0	0	0	0	0	1	0	0	0	0	0	0	0	0	0	0	0	0	0	0	0	0	0	0	0	0	0	0	0	0	0	0	0	0	0	0	0	0	0	0	0	0	0	0	0	0	0
ENSG00000007237.14	75	23	1683	35187	47	3371	144	1596	163	66	713	270	3665	590	2597	124	243	47	1929	35	1	1545	4606	36	1908	122	11	3304	28	4900	965	7	3239	2281	466	265	140	0	1815	1526	964	1424	1601	1474	723	2272	4109	15749	3735
ENSG00000007255.6	219	124	63	127	432	181	135	376	221	202	435	160	1418	310	1063	175	327	121	73	237	365	139	527	249	109	386	271	151	500	211	583	81	72	192	263	229	168	140	411	113	898	719	223	176	33	137	131	599	119
ENSG00000007264.9	0	4	0	3	0	1	0	5	33	0	53	7	31	11	5	9	16	0	0	126	2	0	0	1	18	2	0	0	0	0	20	0	3	0	0	0	0	0	0	5	13	84	0	7	0	0	1	0	34
ENSG00000007306.10	1	0	0	0	0	0	0	0	0	2	0	16	215	42	0	0	0	0	0	0	0	0	0	0	0	50	0	0	0	0	0	0	0	0	0	506	0	0	0	0	48	44	0	0	0	0	0	0	0
ENSG00000007312.8	175	31	0	518	492	8	86	0	0	0	4	0	28	48	36	45	0	110	0	92	71	4	33	14	306	0	10	0	2	0	0	38	0	44	0	0	1	35	12	8	2	141	6	77	2	1	6	0	197
ENSG00000007314.7	22	1	0	0	13	1	24	11	36	0	12	52	3	7	8	0	0	3	0	0	4	10	0	1	5	13	2	61	0	0	17	0	0	4	0	84	9	0	14	10	1	4	8	11	6	8	0	1	2
ENSG00000007341.14	874	782	1755	1204	746	671	1371	548	970	359	479	560	1721	1085	596	1387	250	1291	317	416	1304	592	670	432	824	545	696	833	1120	522	697	398	905	1659	850	583	631	655	1528	1018	898	1015	1031	741	1344	258	749	888	1423
ENSG00000007350.12	43	4	0	0	3	0	0	0	0	0	0	0	0	3	2	0	14	0	0	0	2	0	0	0	0	0	0	0	0	0	0	0	0	0	0	0	1	0	0	0	0	4	0	1	0	0	0	0	0
ENSG00000007372.16	0	1	0	0	0	0	14	0	8	0	7	174	0	5	0	0	0	0	0	4	11	15	8	2	22	0	3	0	0	0	49	0	0	5	0	0	9	0	0	7	0	2	0	1	1	0	12	0	42
ENSG00000007376.3	2688.51	2154	1039	1447	1799	746	768	1375	2393	2572	2317	1572	1976	1245	2423	863	2084	1880	373	1593	3090	1582	923	1480	735	1379	1796	1323	1447	1252	2726	1050	1302	1350	1758	1186	4760	3893	1089	1163	1243	2811	1263	2861	1626	945	998	1259	844
ENSG00000007384.11	3048	1880	2620	1221	2106	2310	9408	2107	3653	2565	2882	1126	1420	3757	8196	2650	2253	3977	723	3296	2814	6957	2918	4095	1959	805	1536	5921	3448	2773	3328	968	2408	3509	4980	1702	1509	2864	3063	5830	2650	2471	3944	3729	4152	3066	2238	5800	2474
ENSG00000007392.12	1645	2151	2682	1441	2116	946	1793	2896	2419	1725	2884	1425	3472	3361	2029	2621	3314	2780	1460	1745	3402	1937	1276	2713	2138	1494	1576	1118	2544	1166	3828	1597	1771	2306	1568	1638	2458	2130	2127	3107	2156	3111	3050	2135	2973	1442	1165	2076	2797
ENSG00000007402.7	4	0	0	0	5	0	4	4	11	1	74	1	6	7	228	2	0	0	0	8	0	1	0	1	2	2	11	15	0	0	28	0	1	13	1	0	4	0	3	0	5	5	10	0	6	0	9	9	14
ENSG00000007516.9	42	29	26	4	221	19	33	307	30	0	105	28	617	156	141	40	206	54	0	137	26	116	8	102	4	48	62	41	82	99	146	32	5	68	97	59	65	121	26	70	111	187	25	249	29	171	29	13	16
ENSG00000007520.3	4784	1376	1275	1169	2651	1809	2575	1187	2696	6893	4302	3429	2850	2051	3095	2578	4754	5327	1350	2820	3781	3219	2682	2609	1253	4023	1454	3815	3764	2086	5254	2348	1526	1669	3709	3258	5752	3128	3262	4061	3103	3869	4233	3391	4344	1846	1420	4203	1484
ENSG00000007541.10	2583	1748	1314	2308	1697	1384	1634	2579	2322	1806	4843	1033	1900	2051	8770	1434	4864.99	1812	684	2343	2790	2527	1494	3893	1368	1130	2082	2527	2118	1494	4943	803	1511	2007	3023	1257	3675	2052	1563	2455	1806	1837	2286	2895	2192	1678	1419	2828	1365
ENSG00000007545.11	2367.21	3058.86	1872.54	1657.5	1857.87	1445	1061.55	2361.37	2250.3	1433	3134	1475.29	4252.18	4173.65	3510.38	1171.67	1832.4	1867.12	1121.69	2174.69	2676.46	1883.81	2001	2614.16	1619.42	1097.77	2664.89	953	1507.64	1484	2841	1000.52	1402.53	2769.27	1931.05	1221.61	2032.05	1812	1396.09	2664.28	3060.45	3180.56	2232.79	5292.12	2094.23	1633	1797.2	2146.56	2228.6
ENSG00000007866.14	17	12	2116	332	10	830	674	2660	1079	1373	1566	738	32	32	4084	619	2082	948	220	139	36	1279	1035	298	588	516	19	2683	1123	957	2518	28	791	1014	3697	779	1541	110	910	1543	18	51	1585	42	1445	1146	1070	3256	539
ENSG00000007908.11	499	5840	0	4	2314	0	4	0	0	0	0	0	354	8330	0	20	0	15	0	533	1184	7	0	4366	0	0	1336	0	42	1	0	150	2	0	0	0	0	780	0	0	439	936	0	976	0	0	0	0	1
ENSG00000007923.11	3728	2644	2570	2525	2848	1980	3063	1834	3897	2673	4088	2135	4683	4986	6640	3115	3267	5763	1757	2571	5404	2927	2363	2954	2149	1287	2305	3054	3797	1787	4205	1962	1834	2061	3438	1916	4741	4344	2716	3840	3504	5215	3074	6188	3597	1913	1634	3041	2210
ENSG00000007933.8	0	0	63	0	0	162	55	285	9	1	0	1	8	5	8	806	0	41	30	0	0	347	438	0	10	2	0	2	323	48	0	0	29	18	23	2	0	0	1385	1092	2	3	8	11	0	72	20	88	60
ENSG00000007944.10	835.12	945	2071	586	3267	606	3068	344	214	96	212	478	6180	2554	670	670	518	1237	466	854	2920	797	792	791	444	572	802	155	2127	1079	391	1367	203	1583	202	671	160	357	365	886	3792	3002	448	2286	649	644	3134	1915	458
ENSG00000007952.13	0	0	3	0	0	0	0	0	0	0	0	1	0	0	0	0	0	1	0	0	0	3	0	0	0	0	0	0	2	0	0	0	0	0	0	1	0	0	2	0	0	1	0	0	0	0	0	46	0
ENSG00000007968.6	388	275	339	364	359	4	349	225	370	321	14	4	126	450	118	10	784	347	0	16	244	15	27	90	176	3	215	96	43	106	22	211	340	46	229	52	1216	402	2	335	103	722	93	1023	428	5	30	25	327
ENSG00000008018.8	10242	5633	8245	5638	11808	2996	8385	4411	12841	7890	5479	5831	15411	7370	9704	6975	7441	12199	1379	6093	15556	4398	3904	4177	6661	5993	5031	10987	13970	4201	7684	5573	7886	6429	12113	5818	12137	7808	7464	9927	7678	19215	7942	7952	11692	5946	3139	7088	6870
ENSG00000008056.8	7	0	1	0	4	122	11	70	29	21	59	9	32	2	222	11	16	5	0	3	2	13	120	28	8	3	4	22	12	193	78	0	4	2	208	2	55	0	12	16	3	10	17	8	2	87	13	100	9
ENSG00000008083.9	1762	1837	1561	3985	1966	578	1045	2161	3778	2845	2273	6229	6132	3194	2158	2077	1076	2371	285	1602	2595	2443	670	2083	1036	5774	1610	715	2397	819	3361	989	2558	1395	2392	8514	1180	776	913	2064	3095	4925	2159	4222	2148	928	823	1716	1386
ENSG00000008086.6	259	486	871	397	262	211	298	398	374	178	912	1017	1444	919	890	644	393	405	222	322	355	481	214	398	732	376	294	221	252	320	709	80	163	684	265	590	313	139	515	544	1039	919	823	981	601	300	599	405	763
ENSG00000008118.5	0	0	579	0	0	1	13	651	0	0	10	0	0	0	28	74	21	87	20	25	0	39	0	5	0	0	0	552	9	0	20	0	3	0	103	0	0	27	85	90	0	0	730	0	808	0	0	7	9
ENSG00000008128.18	465.86	321.45	439.33	244.88	531.14	255.18	533.04	592.3	453.76	451.83	522.06	374.93	649.65	787.33	367.72	405.59	958.5	682.14	746.69	381.86	785.06	766.75	380.31	743.19	464.55	177.14	302.99	444.03	521.19	113.9	865.14	278.05	299.91	493.35	323.05	386.82	591.45	292.15	422.88	437.88	424.99	325.42	556.93	427.08	535.22	435.35	201.31	539.5	362.65
ENSG00000008130.11	7126	3793	3340	4255	4237	3777	3767	2923	5223	4492	5095	3052	4593	5017	6323	2853	4122	5187	1166	6192.45	5296	4705	4940	5266	3136	3290	3769	4661	3746	4110	6330	2619	3807	3611	4638	3722	5404	7667	2609	3143	4047	6476	3373	5933	3694	4962	3950	6436	3733
ENSG00000008196.8	0	0	0	10	0	0	0	0	8	0	29	0	0	0	253	12	894	11	0	110	0	0	0	0	0	0	0	0	0	0	91	0	0	0	0	0	787	0	0	0	0	0	0	4	8	0	0	0	0
ENSG00000008197.4	0	0	0	0	0	0	8	0	0	0	0	0	0	0	0	0	0	0	0	0	0	0	0	0	0	0	0	0	76	0	0	0	0	0	0	0	0	0	0	0	0	0	0	0	0	0	0	0	0
ENSG00000008226.15	0	0	9	18	0	10	17	1	0	0	0	5	0	4	16	52	0	1	16	0	0	1	7	0	25	25	6	22	5	43	38	0	18	23	17	13	0	0	16	5	2	7	23	2	11	3	4	17	92
ENSG00000008256.11	2240	1446	3789	5675	1823	5702	4175	2006	4764	1496	3540	1528	4283	4144	7758	6939	2617	5770	1287	2581	1853	5847	7337	2548	7073	1715	1204	4183	5593	5131	4270	614	4462	6274	2407	1341	3532	1429	4210	5996	2135	3737	4249	3756	2911	7103	5842	13286	11088
ENSG00000008277.10	62	94	235	197	107	17	120	142	46	4	111	3	849	128	538	110	187	116	232	31	159	206	39	106	150	5	35	68	50	59	254	94	113	592	191	0	176	23	136	168	116	140	158	250	147	105	322	8	211
ENSG00000008282.3	4156	3024	3060	1484	4005	2780	2700	3977	2835	9316	3761	5734	11987	8077	3170	4267	4279	4078	2419	3004	4293	3310	3735	2813	4168	4894	2086	4279	2304	2516	4966	2258	2344	3197	3889	4505	4487	6055	3786	7287	6442	9518	5065	11100	5048	2660	1646	3628	5795
ENSG00000008283.11	1800.01	1952	1001	984	4578	1297	2566	279	4020	2565	1834	3244	993	1755	1319	2037	1768	1818	592	1265	3480	3275	1889	1426	1322	2082	1135	1486	1287	2276	2164	1180	2604	1394	1614	2464	1563	1380	1307	1804	980	1563	1366	3488	1080	1428	2324	663	1531
ENSG00000008294.16	11239	8292	9582	8685	10926	5522	32295	4238	12975	6662	12218	20306	29623	20076	6999	30170	10342	27525	8893	7451	15335	17196	8301	7049	18070	14102	6054	8482	19391	8307	16700	5961	10500	17831	6985	12808	6834	8042	16207	23130	15986	27788	21824	24939	20092	8925	11547	8243	25306
ENSG00000008300.10	155	232	744	494	238	359	279	1397	384	229	1802	882	52	346	1988	461	1036	187	155	318	97	1477	777	412	470	475	138	314	273	605	1953	36	255	520	1375	431	223	197	438	485	82	117	446	222	414	649	434	866	553
ENSG00000008311.10	1211	1441	5724	2328	3422	764	3399	1493	1169	577	932	1646	5341	4350	1453	3724	842	3600	1972	1092	5030	3106	1398	959	2200	1306	1312	2306	3671	685	981	3689	2137	3559	1690	959	1188	2024	3941	4245	3227	4230	4496	5375	3678	748	1667	2110	2265
ENSG00000008323.11	11	0	8	0	5	3	2	14	0	1529	247	757	0	0	87	3	353	0	0	0	2	54	0	0	0	1003	4	0	6	7	221	2	6	4	30	1407	391	0	4	11	1	0	0	5	0	0	0	0	8
ENSG00000008324.6	621	308	451	281	625	272	348	387	861	741	531	788	951	414	300	373	701	1133	64	518	1341	239	440	402	415	464	301	322	690	358	702	510	433	311	630	554	713	477	417	589	987	1523	357	588	453	227	127	517	428
ENSG00000008382.11	226	228	179	148	486	82	276	167	226	276	266	182	412	373	576	262	189	256	143	156	557	217	160	259	296	190	249	120	622	131	349	152	219	539	165	331	310	167	296	296	410	523	381	403	247	44	167	302	314
ENSG00000008394.8	561	698	3547	1930	223	8854	687	4085	7707	6324	191	2522	276	309	1152	1514	1257	3313	2778	84	251	2823	15111	386	1276	1616	265	6520	424	5659	318	329	5878	1177	4913	2202	2427	794	2271	4282	333	1017	2747	968	2275	5063	721	7440	1906
ENSG00000008405.7	1976	1635	2045	673	1493	435	690	702	1272	387	1822	1626	1624	1531	2218	898	2450	1795	563	795	1921	692	710	1098.54	1214	1038	1011	823	1591	944	2546	806	461	936	1289	1505	2843	2083	817	1283	1346	1985	1731	2067	1772	813	843	1928	1067
ENSG00000008438.4	0	0	0	0	0	0	0	0	0	0	0	0	0	0	0	0	0	0	0	0	0	0	0	0	0	0	0	0	0	0	0	0	0	0	0	0	0	0	0	0	0	0	0	0	0	0	0	0	0
ENSG00000008441.12	847	933	2620	2075	218	9697	6776	8594	6940	1596	448	393	3206	1015	1857	3138	2	2598	3777	334	1361	13785	12437	459	12087	482	983	5283	5291	4950	602	689	5041	19386	4759	417	205	608	5241	18500	1185	3074	7416	2549	5570	4145	7251	7443	13341
ENSG00000008513.10	8705	9536	6025	1979	7181	5094	6443	7245	5511	1147	7041	3296	16321	28993	5871	9624	3432	10611	5305	8209	8733	6333	6768	6289	3826	1855	8042	3361	7452	9692	8237	1953	1555	2615	6787	4013	2446	2971	6157	4669	24458	15142	8700	19498	6308	11068	4538	20647.02	5175
ENSG00000008516.12	22	10	7	5	4	0	0	0	4	55	2	17	6	5	22	10	69	0	0	6	5	0	1	26	0	5	5	0	3	1	21	0	3	4	27	12	4	0	1	24	3	10	4	4	13	0	7	0	0
ENSG00000008517.12	17586.06	3664	563	116	3511	214	90	95	1733	199	11244	45	372	7770	3218	940	15661	246	46	14582	2164	352	438	16591	24	11	1587	435	1546	2015	13538	979	74	23	3586	65	9852	6375	131	65	884	2665	210	750	47	162	4	324	107
ENSG00000008710.13	7794.37	8225.85	21543.5	14858.75	7541.12	13651.42	23616.62	19064.47	23073.06	7081.05	13344.54	13436.04	6358.65	15895.84	27302.68	28083.17	12175.64	23514.77	9327.5	8630.2	9871.56	35476.12	16445.47	13276.96	17743.04	10228.36	8803.85	17676.14	18908.93	18281.28	14948.15	4234.68	13790.04	33768.58	14906.98	17187.97	7276.31	6647.86	23392.31	29951.68	6182.59	6408.1	57290.65	13155.13	33157.14	22306.09	24451.61	28300.17	24542.13
ENSG00000008735.10	42	19	33	922	79	38	22	20	0	74	101	144	72	45	140	22	27	11	65	52	26	63	24	22	98	52	21	2	15	116	108	12	47	82	9	101	50	114	39	31	35	59	69	73	42	210	352	250	104
ENSG00000008838.13	7947	4019	2491	3412	3326	1428	2150	3642	4273	4666	5051	1669	4172	4491	7713	2173	5550	3925	672	3868	4925	3946	2017	3921	2226	1515	3717	5525	3222	1983	5957	1395	3066	2981	5524	1645	6688	8328	2061	3443	3062	5486	3026	7011	3810	2486	1969	3770	2801
ENSG00000008853.12	3159	1100	1293	1595	1176	1116	1790	1819	1743	4669	1294	1207	1484	1176	2688	1058	1457	2261	693	1407	1282	2242	1449	1475	1787	732	1152	1756	1340	2255	1162	440	1010	3061	2734	561	2008	1990	1199	1679	1243	1600	1110	1700	996	1557	2720	2314	2051
ENSG00000008869.7	3160	5226	4183	3382	5104	1219	3087	1321	3959	1971	3230	5701	11640	8816	2372	6068	2293	6069	1771	3197	6680	3841	2097	2760	3864	3991	3174	2093	4829	1484	4603	2976	2957	4468	2316	3745	1989	4479	3195	5572	6732	9924	5510	10427	6172	1620	3063	1620	4924
ENSG00000008952.12	4501	3690	8219	2665	5656	4057	9169	5109	5135	3258	4214	5739	12232	8813	3783	14625	4381	14936	3133	4301	7607	7352	6354	3742	9239	4002	2609	5444	8238	4584	6229	3934	3468	5572	6208	5035	4162	4673.01	9754	8620	8971	8987	11478	9130	9525	4179	4320	6148	11304
ENSG00000008988.5	25944.98	17089	15657	10414	42079	14913	27946	26843	48066	36623	37151	42813	50635.86	22752	20507	40313	45492.04	39040	34425	20624	59995.25	22595	25602	11050	29368	36991	17369	20029	61049.99	18522.01	46992	12066	31950	27407	38784	37967	32522	17795	41571	42963.08	30090	38170	39968	28313	27652	22310.07	8587	43515.18	27134
ENSG00000009307.11	38984	46313	53880	19779	54268	22265	69218	31976	53161	31604	42149	115015	153097	76960	33390	99576	34590	87353	41716	27837	103433	70743	29435	23078	56038	88206	34372	44447	91428	29131	65754	27648	36165	48184	42058	99272	37167	45993.21	86578	81980	72638	118934	88154	100719	84530	28037	32073	30115	76170
ENSG00000009335.13	14247	14067	16505	7938	14232	4404	13481	6061	14875	8972	10819	19742	23519	16938	9811	16600	7969	25100	1952	9420	22048	13392	5931	8182	10353	13309	9692	11635	17742	9884	14635	8664	8056	11268	13004	11682	13893	15798	13136	16038	17276	25118	16745	27134	19925	8625	11825	11201.97	12315
ENSG00000009413.11	4422	8016	10468	10710	5760	7026	7366	10551	11185	2604	4321	5131	11989	10347	4817	12066	3193	4654	11236	4921	7802	30393	11259	5445	38678	1941	6019	3764	4757	6507	5507	2519	28412	39904	3078	2694	2292	5508	14875	48218	5550	7739	12624	15669	11760	6334	17088	4440	43027
ENSG00000009694.9	2	0	0	10	3	20	8	0	16	0	38	21	3	0	66	0	6	3	0	1	1	17	0	0	71	264	0	0	0	0	36	0	1	12	4	59	12	0	20	24	0	0	7	2	7	0	9	0	46
ENSG00000009709.7	0	0	0	0	2	0	9	0	37	0	0	0	0	0	0	9	0	0	0	0	0	0	0	0	0	0	0	0	0	0	0	0	0	0	0	8	0	0	0	0	0	0	0	0	0	0	0	0	0
ENSG00000009724.12	0	0	0	0	0	0	3	0	14	0	33	1	0	0	0	0	0	15	0	0	7	5	0	1	0	0	0	0	0	0	0	0	0	0	0	1	0	0	0	0	1	1	0	0	0	0	0	0	9
ENSG00000009765.10	0	0	0	0	0	0	3	12	5	2	0	0	0	0	0	0	0	4	0	0	0	0	3	0	4	2	0	0	0	0	0	3	9	3	0	1	0	0	0	0	3	0	0	4	0	0	0	0	8
ENSG00000009780.11	1133	585	1362	2264	944	467	1562	771	995	676	515	1463	1428	585	609	1534	560	1330	702	483	1030	1075	453	458	1641	1152	315	400	1134	349	1254	603	875	2264	661	1218	952	587	1592	1658	1100	1211	1657	948	1681	376	1410	965	1901
ENSG00000009790.10	0	0	2	0	0	0	2	0	0	0	0	0	0	0	0	0	0	0	22	0	2	1	0	0	0	0	0	0	1	0	0	0	0	0	20	1	0	0	1	0	0	0	0	0	0	0	0	0	2
ENSG00000009830.7	1242	1220	1838	1560	989	738	1253	1068	1927	774	3371	1236	1146	1356	3026	1606	2446	2053	603	1704	1547	1388	1200	1783	787	867	1094	2044	1695	963	3732	751	1320	1336	2115	855	1870	1156	1203	1491	891	1581	2485	1762	2079	990	1449	1616	994
ENSG00000009844.11	3746	3128	5628	3210	1895	1590	2406	2659	5703	3221	2674	4197	3891	2424	2528	4254	3528	6470	1030	2120	4100	2884	2097	2000	4082	2932	2391	4303	3407	2578	3715	2143	2586	2927	4022	3208	4235	3941	2938	3947	2091	3884	2913	3905	4263	2216	2659	3557	5689
ENSG00000009950.11	0	0	0	0	0	0	6	94	0	10	11	10	1	1	40	0	0	0	27	0	0	10	12	0	1	0	0	0	0	47	6	0	24	10	0	3	0	0	18	0	0	0	2	0	0	0	0	1	0
ENSG00000009954.6	9113.02	9511	10954	7269	9034	5138	13774	7237	11552	6293	10191	15966	15908	12359	7336	9447	10553	19283	15405	7091	14515	9551	6779	7011	10233	8341	5442	6826	10966	5407	13911	6555	8329	10916	9800	11128	10586	7478	13546	13572	8670	15665	14895	17490	18571	4396	6073	7487	16121
ENSG00000010017.9	2308	2235	2286	2041	2553	1489	3820	2730	2086	2288	2539	4843	3937	4099	2635	3561	1486	3101	980	2175	3234	3560	2128	1869	6952	2944	1618	2213	3431	1851	2993	1176	2081	4216	2712	3941	2347	2784	4882	5032	2777	3965	3722	6027	3658	1989	2448	3601.43	7759
ENSG00000010030.9	104	17	36	237	10	36	3	15	0	26	272	8	0	18	58	123	151	24	0	47	20	47	21	72	123	1	6	8	56	1	427	39	12	48	79	6	40	75	52	12	2	14	10	6	9	0	39	0	263
ENSG00000010072.11	1425	1487	1865	1035	1432	450	1070	579	1026	818	902	1580	2169	1673	941	1132	1367	1697	451	938	2377	965	762	941	1108	981	999	1171	1260	804	1142	1013	791	1063	1092	1065	1390	1573	1233	1203	1589	2130	1137	2272	1595	938	1027	689	1425
ENSG00000010165.15	3221	1324	1135	1544	2679	1059	2635	1257	2648	1672	3001	2225	3932	4066	2257	2330	2028	4686	1013	2150	4827	3308	1436	1411	1220	2639	902	2409	3719	1437	3418	1706	1423	1285	2795	2772	4557	3031	4097	4063	2999	3505	2718	4157	4070	755	1163	2065	1703
ENSG00000010219.9	1045	677	647	520	617	439	1116	887	940	836	1018	835	2621	748.85	1378	894	884	805	125	1008	1209	717	486	663	830	427	374	1156	2127	685	1641	675	506	780	1680	931	795	592	1203	1059	1512	1647	1151	894	873	786	425	1273	1003
ENSG00000010244.12	10830	15882	14762	9913	9954.89	4432	8771	10428	16302	6864	8864	6608	16219	12970	10045	9806	10013	11469	3620	7860	15415.61	9283.12	6459	8302	16372	7399	9917.59	7690	10989	5514	11306	6833	11552	14643	11578	9063.66	13970.87	12227	8041	17389	7736	15160.6	13231	12974	15307	5906	9697	7716	17948
ENSG00000010256.6	12887	6822	10795	9044	11784	5224	9460	13032	14863	22551	14361	22049	14744	8582	18712	8285	17744	17319	2750	7654	18373	11039	6378	5278	6644	27939	6532	17378	19871	7297	18111	7145	8680	9938	21739	17340	19248.16	12236	11334	17174	8265	22833	14290	15457	21015	6873	7652	10488	6607
ENSG00000010270.9	4503	4032	4744	2626	5531	947	3995	2245	5535	1895	3104	1826	8809	5912	2792	5324	2928	7512	567	3092	7282	4025	1239	2536	2420	1779	2645	3493	5412	1910	3695	3945	2502	1249	5386	1542	4223	4659	5461	5258	7517	11009	4787	6434	6037	1728	1540	2436	3224
ENSG00000010278.7	28928	20168	5676	6418	14444	846	21207	943	2716	20551	6677	13523	52880	18518	6682	23497	9707	12128	838	39110.21	41858	14326	1239	11553	8826	20024	22954	4040	12947	2466	8704	18868	3424	12389	5794	16401	11443	31140	9604	20486	49615	63437	15333	21150	22358	3387	3708	1688	13008
ENSG00000010282.10	0	0	0	0	0	0	0	0	0	0	0	0	0	0	0	0	0	0	0	0	0	0	0	0	0	0	0	0	1	0	0	0	0	0	0	0	0	0	0	0	0	0	0	0	0	0	0	0	0
ENSG00000010292.8	12412	6216	6962	3997	8287	2729	6625	5991	7501	10474	4701	4065	4947	6017	6296	4896	10500	16643	1306	3434	10811	5053	3489	3711.04	4460	2329	3738	15284	6231	2967	5399	4224	7502	6447	12309	2019	14594	11614	2490	17436	2582	14044	7703	18430	18278	3201	3384	2265	6310
ENSG00000010295.15	1589	675	765	1160	876	1037	2588	567	976	149	732	34	1564	1324	1419	1998	813	1129	546	1896	1137	1902	1563	1716	1240	52	693	921	1141	798	1198	375	801	2877	760	54	959	1237	856	2206	1007	1577	1346	1449	1551	900	926	2493	1100
ENSG00000010310.4	0	2	1	0	2	16	7	85	0	55	1	55	3	0	58	29	16	13	6	0	2	0	1	24	30	39	3	17	133	35	23	8	0	11	1	30	21	0	1	13	4	3	0	4	4	5	0	5	31
ENSG00000010318.15	219	158	105	324	183	66	279	151	222	132	173	502	314	199	203	97	176	117	106	169	231	115	130	91	322	214	126	188	142	51	104	75	157	217	139	377	170	128	144	152	185	276	147	251	239	66	80	121	291
ENSG00000010319.2	550	1311	0	6	1258	9	11	58	0	17	0	12	15498	14224	52	11	76	14	5	466	8116	9	16	4739	4	18	3902	0	203	57	37	2658	1	99	15	10	13	75	13	6	2544	6646	6	5157	5	11	25	2	4
ENSG00000010322.11	4784	9042	8815	4786	7648	4937	6966	7362	6499	4818	8170	3515	9188	13205	15844	9514	6268	6436	4951	9341	13621	13435	5703	10652	6750	3076	8744	4957	10252	3390	9688	5540	4718	8723	4902	4353	4282	4214	7750	10224	6022	6798	12468	10498	7911	4024	8263	7342	9727
ENSG00000010327.6	35801	43808	134	12	49946	485	1340	155	33	0	146	5	152085	106119	37	240	38	206	146	48192.02	73350	33	710	51131	826	4	57872	203	28	802	76	21553	27	0	126	8	30	54739.02	30	122	61186	53210	123	131111	88	234	107	59	629
ENSG00000010361.9	748	358	449	759	1108	749	979	783	559	481	456	349	873	895	1784	1102	445	1498	517	325	910	1728	720	390	366	366	382	901	1251	425	533	620	837	645	1167	512	717	517	1441	1532	813	1160	1258	1246	995	494	551	609	678
ENSG00000010379.11	0	3	1	3	0	0	3	45	2	0	1	3	7	5	230	17	1	6	0	0	3	4	4	0	2	10	0	0	9	0	0	2	4	1	0	25	13	0	1	0	1	5	0	6	5	0	6	0	11
ENSG00000010404.13	3794	5148.25	5889.4	3224.25	3516.39	3000.57	8523.32	2729.8	7128.44	3578	8372.08	3575.6	6259.02	5369.18	6809.11	8838.54	7954.87	5598.14	1048	8404.07	5396.7	6523.77	4783	5151.88	8721.74	2174.5	4037.57	4262	6515.78	3042.53	10040.76	1503.84	3630.25	6550.04	6091.05	3602.02	5374.85	4917	3172.61	6410.98	4675.58	4930.39	8152.91	6578.01	5954.12	2086.39	3755.25	2056.09	9854.49
ENSG00000010438.12	458	236	85	0	101	44	1241	83	279	1737	23	845	90	53	25	175	74	815	60	469	1888	221	73	313	6	2380	110	1159	304	83	139	229	120	6	459	1535	80	2057	9	363	59	569	572	42	1972	172	9	412	9
ENSG00000010539.7	677	864	697	571	956	333	649	669	1227	572	620	1028	1415	965	453	961	565	1318	289	373	1118	722	672	601	660	820	614	286	940	581	561	580	379	656	543	790	625	866	744	801	1040	1292	859	1271	859	849	458	829	1038
ENSG00000010610.5	0	0	92	138	0	52	738	1370	0	16	0	0	0	0	165	40	21	17	87	0	0	94	48	2	336	1	0	0	21	173	9	0	19	285	1366	1	9	0	1710	12	0	1	5	0	0	37	122	16	186
ENSG00000010626.10	220	55.93	122.21	160.43	90	237	395.48	375.36	110	244	282.48	339.46	137.39	138.58	470.99	574.75	435	370.26	504	246.16	179.36	403.88	174.19	132.26	272.81	433	65.68	509.54	565.25	238	425	139.98	159.3	275.35	228.81	473.2	137.45	161	540	429.49	151.62	148.68	508.01	92.49	339.77	133	169.75	195	321.7
ENSG00000010671.11	0	0	0	14	0	0	0	0	0	18	0	0	0	2	0	0	0	0	0	1	6	0	0	0	2	1	0	4	7	0	2	8	0	0	0	2	9	0	1	10	0	1	0	0	4	0	0	0	0
ENSG00000010704.14	587	169	1578	865	450	955	1728	1285	974	520	215	249	487	392	1140	1600	313	1770	529	267	412	1691	1075	308	1248	276	162	1842	1014	982	248	437	803	1468	971	400	518	1220	910	3203	215	589	1634	704	2020	846	955	927	2032
ENSG00000010803.12	1789	1467	1172	993	839	958	695	1842	1039	620	1406	330	1231	1145	3295	696	1013	809	362	1120	1139	1582	1132	940	2141	291	1170	2253	1042	1250	2111	434	627	1559	2866	359	1518	2391.31	1598	1083	876	1332	1232	1281	975	1132	1731	1905	2523
ENSG00000010810.13	7901	6330	1367	3067	12671	2491	4108	2327	3534	1313	4968	6037	9596	8463	2055	9803	3194	5929	2826	6751	11780	4944	2996	5742	9173	2654	3641	2281	4494	5039	6290	5297	2701	5971	3833	4890	1794	5274	4229	3287	6011	10041	5049	11080	2349	3306	4334	3622	12266
ENSG00000010818.4	1696	1334	7931	4278	1434	2304	8321	4051	5684	3116	7984	5095	6467	5349	7778	8292	4603	7132	2044	2676	1082	4430	2904	3528	8675	2840	1304	1800	3558	3722	9539	684	2873	7019	4620	4149	3188	1273	5085	4733	5903	4069	4069	5038	4819	1751	6080	2043	10673
ENSG00000010932.11	0	0	6	0	0	134	0	0	0	0	0	0	0	0	0	9	0	0	91	0	0	17	124	0	2	0	0	0	2	0	0	0	0	3	0	0	0	0	26	25	0	0	30	0	7	0	203	218	2
ENSG00000011007.8	5998	7517	6897	6084	3561	2567	5566	3934	10410	4395	6222	4566	6598	4200	2938	4368	3848	10619	2939	4547	5988	4651	3874	4517	5360	2991	5221	4092	5028	4957	8946	1743	4447	5341	4310	3511	4474	5398	3253	4601	5027	5517	3443	6310	4434	4957	5165	4686	7244
ENSG00000011009.6	5850	4601	1555	2192	4650	792	1798	1554	2938	3530	8630	1621	8255	3821	8056	1293	6896	2785	228	5284	7269.93	1833	1298	3691	875	1431	3983	2597.02	2988.82	1599	8357	1534	1472	1196	4092	1826	6979	6176	1289	1444	4563	8779	1098	5959	1403	2453.78	1018	2283	1164.09
ENSG00000011021.17	1380	1522	1874	2209	946	862	850	2084	1155	580	2552	975	1508	1441	2690	982	1090	701	1115	1660	841	2063	863	1426	1571	604	909	2145	1266	1004	2805	757	1868	3690	2204	477	1194	806	1721	3272	1383	1762	2839	1871	2517	858	2281	1648	1443
ENSG00000011028.9	1454	1654	36136	83	512	42110	50789	42781	29975	6511	8253	1141	5925	4641	70100	39361	8146	30479	11961	8051	14524	84526	52674	10867.67	31093	1816	3886	31132	98032	37817	9404	4074	16249	45447	49772	4010	2474	1404	47778	59472	1068	3402	100996	2718	44688	43630	33170	51989	42561
ENSG00000011052.17	1211.71	592.1	1216.49	686.89	1532.28	202.59	1356.3	487.66	1636.02	779.17	537.62	994.19	746.06	1035.84	817.5	1789.18	1123.61	2415.23	0	1005.77	1548.78	611.14	307.33	359.24	478.29	2606.3	606.81	50.72	2170.46	981.3	1188.6	257.88	699.31	487.29	2796.77	1083.74	2172.21	1033.31	1181.1	928.23	1478.75	2849.41	1973.96	1481.59	694.44	401.77	81.71	706.7	837.89
ENSG00000011083.4	0	0	3	0	0	0	1	0	4	0	0	1	0	0	0	6	0	4	0	0	0	0	0	0	0	0	0	0	0	0	0	0	0	5	4	0	0	0	0	0	0	0	3	0	0	0	1	0	1
ENSG00000011105.7	5267	5651	7622	1200	7616	2147	4228	4289	1494	839	2168	809	30175	12771	6051	4774	2829	6658	1110	5531	12046	5037	2750	4942	1368	647	5728	7738	8293	3032	2693	2425	492	3031	4532	1164	2594	2291	4278	2028	15052	19969	4358	17791	2943	2987	2714	6471	1324
ENSG00000011114.10	3068	6347	6469	2062	4310	2876	5231	3415	5310	2003	4922	7115	11509	6451	6310	5821	5749	5537	3576	3939	9820	4905	3933	3789	7105	4118	4887	2373	6948	2555	7114	2710	3828	6192	3427	5172	4117	3755	5138	5855	7420	8723	6659	7791	6166	2277	5094	3173.02	9017
ENSG00000011132.7	2032	873	987	1083	1218	757	662	1615	1180	888	1885	1434	1335	1417	2458	1307	1627	1537	738	1250	1228	1526	1079	1333	450	661	872	1372	1163	840	2237	778	661	753	1565	977	1586	2196	1295	1057	1349	1556	1200	1457	969	782	684	1407	634
ENSG00000011143.12	528	477	460	631	673	294	645	420	771	537	994	696	1483	738	1073	725	1120	901	265	248	1157	647	330	378	486	594	442	1196	1079	340	1213	503	449	562	535	514	677	821	835	1282	608	1483	1204	954	1396	419	404	357	646
ENSG00000011198.3	3298	1367	1793	587	1341	654	1957	652	2608	1015	1195	3791	2182	1426	648	4238	994	4545	274	1427	2555	2802	954	463	2351	2495	980	1096	1997	782	1381	1047	1061	1621	1408	2783	1520	5366	5529	2974	1212	1952	5582	1840	6387	751	975	629	2908
ENSG00000011201.6	135	126	247	69	41	653	3156	46	0	132	1215	40	45	368	404	1182	421	418	555	557	142	0	1103	489	3690	33	515	218	3046	2157	1998	19	1	17	861	77	297	70	12	1	107	41	1709	74	2563	1807	13	3412	5977
ENSG00000011243.13	2875	2349	2557	2644	3147	1293	3916	4024	2856	4119	3836	5144	4616	4412	4801	3630	5029	3731	1786	3259	4571	3532	1875	3246	1567	4445	2077	3613	4686	2118	5531	1765	2256	3143	3353	5037	3012	2303	4058	3424	2621	4186	4302	3421	4090	2365	1902	3052	1855
ENSG00000011258.11	504	1252	1235	838	1271	606	988	1238	955	525	1206	1328	5550	2452	1384	1550	967	971	794	408	2550	866	1233	1084	1331	1082	994	393	1399	441	1574	978	818	1797	510	1042	662	618	1709	1803	2211	2863	1657	2640	1395	745	746	710	1840
ENSG00000011260.9	3020.21	1592	1869	1564	1521	906	2037	1112	2992	2658	1981	1900	3674	1608	1192	2498	4198	4763	1899	1364	3424	1950	1339	961	2081	2163	917	2685	2449	1227	2743	2286	2012	1647	3074	1628	4840	3363	1805	3528	1596	3148	3840	2609	4785	1422	1045	1363	2496
ENSG00000011275.14	6169	6401	7391	4318	4099	3976	4234	3967	6013	2636	5834	3906	9037	7144	7291	7192	5328	7613	2812	5091	6598	7398	4281	5421	6863	2494	5097	4665	6605	4806	7760	2356	3673	7107	5712	2767	5105	4031	5666	6938.98	5156	7614	7105	8065	6146	4836	6277	6448	8124
ENSG00000011295.11	2503	2414	2705	2410	3160.03	1536	3041.81	2206	3414	2484	4216	4189.66	6458.3	3606	3583	2520	5088	3777	1998	1866	4723	2093.36	2297	2208.12	2526.19	2728	2102	1658	4031.2	1625	6478	1996	2041	2254	2816	2473	4041	2912	2115.9	3698	2933	5901	3232	5367	3182.09	1755	1232	2838	2756
ENSG00000011304.12	31370	14813	8537	7083	9574	6707	4944	19759	15853	14274	22067	8911	11230	13128	24166	4413	16689	13810	954	13096	13708	6486	8132	15269	7478	5926	10845	16873	7911	11141	24391	5058	7671	5954	28338	6663	36817	25721	4458	6773	8980	15365	6068	18313	9266	14067	5114	15843.31	8036
ENSG00000011332.15	97	24	108	38	28	1	78	137	358	110	104	11	7	21	25	32	97	263	17	18	100	66	6	53	49	0	24	126	73	94	86	29	40	59	293	10	162	168	32	78	6	18	38	33	147	199	23	63	52
ENSG00000011347.5	7	14	19	14	172	102	795	212	212	195	1495	2945	47	41	339	83	41	36	589	14	15	1640	208	33	415	1714	55	158	43	70	1643	11	865	238	368	3502	1	0	1334	1568	3	44	3051	234	3799	72	34	53	446
ENSG00000011376.5	3370.07	1748	3041	2793	2432	626	2160	1731	3091	3665	2710	2477	4742	4021	3555	2189	3126	5149	555	1608	3777	3717	1126	1285	1649	2191	1464	3244	3195	1191	3525	2137	2067	1813	3748	2436	3966	2423	2966	3250	3180	3934	3884	5273	5291	1826	1714	2187	1894
ENSG00000011405.9	25375	21572	15060	9012	13230	4523	7993	4301	8779	5664	9063	17065	19568	15409	6098	19111	8472	21560	5783	11414	27763	8587	7236	8427	10337	7664	12765	8711	16582	17667	11859	17782	5454	9016	7831	8265	8200	26196.79	9708	12759	8985	17557	16034	29132	14808	18767	6581	12805	13581
ENSG00000011422.7	7241	2209	1799	206	1238	1178	4496	2911	6637	2671	11156	2325	221	1317	2038	3941	14490	7003	652	4591	4292	2136	1335	2489	1055	1028	1297	4823	2213	1696	14108	1190	3099	1293	6692	643	6373	10094	1163	3937	314	759	5642	1120	8742	2314	1916	2727	1413
ENSG00000011426.6	22725	10153	13081	6261	8737	717	11910	2636	16280	13028	1351	183	2436	5549	1414	1900	21662	23319	365	2203	16032	1428	846	3136	7870	229	3599	18072	3456	2535	2032	4730	9939	3094	12807	195	27192	23986.06	840	20610	1092	11040	7461	15365	33352	1852	1567	446.99	13680
ENSG00000011451.13	5248	1525	864	877	821	3526	813	4803	1614	2429	6778	805	982	1377	9647	939	2980	1137	470	6224.05	1178	2714	3897	5326	1056	327	1562	2620	974	3237	6541	285	734	1523	4965	576	3380	4443	928	1736	969	1054	1400	2742	869	3239	1607	5517	1506
ENSG00000011454.12	1473	4570	6754	3286	4749	1395	5210	2894	3724	1992	2493	8928	17211	10526	2248	6852	1369	3819	3287	2115	5805	5789	2855	2821	11331	4783	3705	1471	6902	1519	3328	2998	3232	9935	1994	11160	1068	2037	6879	8096	7030	11333	8542	11664	6334	1693	7212	2577	17894
ENSG00000011465.12	9	67	6561	20	51	82911	7447	66200	36994	506	54	6	0	15	23490	18973	556	5417	32941	296	19	123001	129919	353	319867	636	26	19101	16192	110134	119	153	50454	88225	9898	27	147	1	42362	63592	4	1	12954	83	5809	87216	32831	144668.98	399082
ENSG00000011478.7	1225	1086	1678	2922	489	539	641	791	2005	1639	1680	1605	648	399	1839	2465	1291	2779	115	1437	966	720	576	779	743	854	888	2003	1049	1039	1272	621	1219	1186	1572	575	1771	1603	356	737	626	1652	1864	949	1206	1202	1102	1285	775
ENSG00000011485.10	7162	3869	2007	2853	4681	1884	3669	4750	4045	4459	4210	2112	6757	6033	5807	2312	5015	6476	274	4055	7654	3438	3352	3848	2094	1904	2605	5765	5445	3478	4900	2704	2879	4964	7861	2370	7575	7295	2128	4607	4295	7675	3315	8985	6144	4159	2447	3368	2144
ENSG00000011523.9	2138	4420	1561	1217	6581	1244	1606	1442	1834	1070	1071	399	22520	7021	2347	972	1078	1465	1083	2344	6073	2964	1596	2443	1682	747	3519	1073	1209	934	1087	1697	1859	2968	1261	756	903	1349	2357	1917	7570	14986	1837	9302	1474	1217	1559	1239	2954
ENSG00000011566.10	2495	3089	8362	4536	2923	2298	4067	1484	5142	2044	2978	3301	3297	2279	4318	7622	2885	4966	1691	2141	3664	4080	3015	2609	3707	2346	2118	4111	5993	3305	3893	1715	2574	4495	4032	2616	3006	1775	3532	6630	1656	2567	6339	2677	8593	3741	3769	6049	7119
ENSG00000011590.9	0	0	0	0	0	0	0	0	0	0	0	0	0	0	0	0	0	0	0	0	0	0	0	0	0	0	0	0	0	0	0	0	0	0	0	0	0	0	0	0	0	0	0	0	0	0	0	0	0
ENSG00000011600.7	0	0	0	0	0	0	0	0	0	0	8	0	0	0	0	0	0	0	0	0	0	3	0	0	1	0	0	0	0	0	0	0	0	0	0	0	0	0	3	0	0	0	0	0	0	0	4	0	1
ENSG00000011638.6	797	804	1814	796	2585	1204	1201	619	1244	4061	2503	5169	287	574	1830	4804	2114	2216	2002	1885	1584	3571	1222	772	1710	3849	1102	1957	2600	747	2935	1139	1144	2358	1869	2847	977	1585	5870	3339	131	624	5260	592	2780	1117	1326	2658	2589
ENSG00000011677.8	0	0	0	0	0	0	0	0	0	0	0	0	0	0	0	0	0	0	0	0	0	0	0	0	0	0	0	1	0	0	0	0	0	12	0	1	0	0	0	0	0	0	13	0	46	0	86	0	0
ENSG00000012048.15	3601	1337	1569	2655	2409	108	2679	624	2780	2010	1016	617	1206	2143	434	749	3822	5714	283	693	3161	656	399	667	1401	344	454	2270	848	390	1268	1426	1659	669	2127	347	4805	2595	604	4146	580	3519	2527	4659	6278	341	368	143	2727
ENSG00000012061.11	4827	2848	2584	2693	2662	1819	5294	4122	10492	4712	2990	3318	3741	1822	4792	3474	3040	8155	1560	3442	5584	3489	2531	2456	3031	2475	2627	7070	5423	2742	3296	1628	4688	4367	9197	3029	3062	5031	3496	4116	2767	3966	4381	3169	5891	2887	2697	3808	3283
ENSG00000012124.10	15	10	0	0	115	142	14	0	4	0	68	16	6	60	93	33	16	79	0	45	2	0	115	7	4	7	0	6	69	0	64	0	0	14	103	1	127	143	2	0	1	2	14	14	17	1	0	0	43
ENSG00000012171.13	4	72	1518	248	50	244	978	1301	162	255	1310	723	89	62	5128	228	1932	102	3953	25	39	6666	242	88	1560	610	27	1668	883	142	1725	37	60	537	323	212	418	9	5238	2417	53	40	2825	35	682	80	275	1325	1306
ENSG00000012174.7	1203	908.2	1469.88	1282	636.46	1242.94	1284.61	2240	1611.3	772	1778	1158.5	1551.08	1790.72	1944.83	1691.02	837	2408.5	356	1356.9	950.01	1422	1848.12	1144	1745.43	613	535	1470	1237.39	1956	2586	546.75	1076.28	1096	2223.51	757	920.66	1823	1349.19	2943	774.14	1276.07	2304	2404.75	2314.04	862	822	1167	2082
ENSG00000012211.8	427	298	278	472	338	490	278	682	672	1235	826	1237	289	448	748	310	551	407	61	429	281	592	560	659	316	645	282	562	334	240	631	190	313	369	803	723	828	288	312	414	252	367	290	650	199	362	355	544	375
ENSG00000012223.8	25	5	3	241	21	1	0	0	0	0	0	8	35	3	0	199	0	32	0	0	2	0	0	0	4	7	6	0	0	1449	0	0	0	0	0	1	0	54	0	0	3	41	5	91	0	3	0	0	2
ENSG00000012232.4	11744	8241	6886	7189	6585	1773	4129	4823	4128	8641	8129	7757	10114	11107	12548	5334	10920	8943	2002	9706.28	11137	5655	2655	8365	3484	3932	6598	8080	5056	3376	9276	3784	2572	6350	8269	5473	10755.91	10288	3403	4933	9149	11629	5207	11531	6284	3231	5593	5482	4717
ENSG00000012504.9	0	0	8	1	0	0	0	0	0	0	5	1	0	0	82	0	0	9	0	5	0	0	0	0	0	0	0	19	0	0	10	0	0	0	21	0	0	0	1	0	0	0	0	8	1	0	0	5	0
ENSG00000012660.9	7343	6534	9421	3396	5599	3924	6502	7826	5331	5196	5872	3709	10658	11550	7036	7685	5587	9239	1844	6000	8363	6476	4587	5807	10990	3251	5663	12250	12505	6139	6590	3380	5763	7201	12910	2690	9048	7883.93	6778	9386	6947	13931	8920	13862	8557	4902	6341	10717	15137
ENSG00000012779.6	0	0	0	0	0	0	0	3	0	7	1062	3	1	11	401	15	139	13	0	0	3	0	0	1	0	9	1	0	0	0	1246	5	0	0	4	10	374	0	2	0	0	0	0	6	0	0	0	0	0
ENSG00000012822.11	2950	2640	4433	2352	4733	4569	5658	4336	3418	1405	3219	2902	9512	7845	6329	10314	2843	3996	5228	3080	4968	13601	5822	3066	7224	2445	2910	3740	6121	4259	4829	2206	3595	7577	3463	3347	1166	2301	9512	8190	6451	6107	7630	7510	4241	5163	5258	8786.08	9127
ENSG00000012963.9	3539	2391	2487	1832.64	3357.97	768	2889.61	1831	2825	1698	1367	1413.64	4888.32	3645.92	2351	1594	2622	5130.6	1020	1546	4341.51	1568.54	1119	1179.9	2270	861	1294	2412	2577.22	889	2263	1674	1748	2321	2820	1281.32	3796.52	4214	2006.97	3762.65	2903.06	5690.13	2309.99	4924.43	5362.46	654	1124	1333	4156
ENSG00000012983.7	4132	4264	7706	3414	2845	1666	3884	1306	4535	2444	4607	3103	11215	4442	5138	6120	4377	7468	1346	4103	4227	3460	2617	4434	8075	1928	3124	2727	4435	3023	6180	2245	2238	6611	4127	2410	3871	4361	3848	4637	5871	6352	6180	6457	5783	2341	6538	3338	10826
ENSG00000013016.10	1068	658	7648	1210	1200	641	11350	5051	3329	583	2249	281	3294	1218	3129	12043	809	13536	954	2571	953	5957	648	2368	1884	248	633	3949	15639	2019	2259	817	1609	14579	4965	415	904	595	2492	6694	1656	1462	4370	1669	2910	2233	10678	2641	1837
ENSG00000013275.3	6907	4716	4260	5884	4425	1944	4423	3165	10827	4331	4155	4381	5198	5359	5375	4138	5399	10396	544	4577	8708	4402	2466	3890	2927	4168	3343	6607	8420	3561	5695	3856	4085	2795	7813	4241	8533	8072	3590	6474	4100	7861	4969	7072	7492	3699	2752	4397	3286
ENSG00000013288.4	4247	2385	2531	3073	2032	5687	3741	3187	2291	2030	4309	1463	3150	4380	11583	4848	4351	3962	1647	8117	3127	6209	5686	8771	2994	923	2402	4123	3405	5030	5100	623	1745	4820	5307	1575	2684	3990	2915	4594	2254	2328	5502	4847	2433	4326	4194	5306	4856
ENSG00000013293.5	105	303	719	0	66	19	4	9	291	0	16	0	10	478	59	4668	35	573	683	972	901	2656	56	161	32	9	464	3	315	493	0	288	1286	6093	1115	0	10	20	77	1421	10	44	306	67	191	668	893	1146	129
ENSG00000013297.6	39492.97	36399	24908	40	19101	4255	201	1393	55459	107	146	41	9983	15738	5359	26857	2534	19361	12390	8185	87	44373	6056	4473	1341	295	41118	10384	13231	11881	189	6458	58895	27088	32765	14	4361	73725.99	8737	15784	2420	26571	19619	30883	26001	9709	16286	32978	2790
ENSG00000013306.11	5204	3301	2321	2984	2944	1292	3102	2322	6063	9462	5832	4373	4406	4473	7864	3085	7945	5433	1026	3194	4842	4490	2158	3321	1819	3722	3236	4172	4517	2791	7700	1488	3110	3613	4622	5084	9066	5530	2437	3535	4228	5291	3648	7045	3743	2791	2317	3578	2397
ENSG00000013364.14	35439	13445	17403	14095	29734	15692	48216	26906	37433	8702	16943	7914	19001	26185	30094	21171	18370	34098	9467	21076.03	38900.99	66180	18271	13667	24872	8367	13314	33762	40344.96	13932	20221	11341	26908	32981	34424	11432	19159.17	40447.84	37718	75545	15208	28925	44279	31061	46236	16011	31182	20029	23452
ENSG00000013374.11	5028	2206	3406	2078	3344	1646	4219	2087	2321	2153	3671	2544	4827	4443	2613	5333	4611	4497	3286	2759	4008	4261	2840	2246	3641	2587	1614	3862	4278	1964	5664	1748	1834	2734	4158	2554	3355	2506	3875	3509	3348	4314	4828	5823	4259	1996	2269	2806.95	5612
ENSG00000013375.11	6105	5578	13130	3176	7109	3259	12215	2427	11387	2792	3768	11290	13035	9921	3332	18694	4039	22632	3310	5453	14024	10034	4126	3714	10660	9182	4599	8780	31787	7823	4975	5884	4960	5429	9799	8765	4517	6032	9128	12757	6879	12406	15668	9005	16925	8044	6543	8582	12156
ENSG00000013392.6	634	390	564	385	506	279	715	651	431	334	506	669	892	567	784	853	496	701	325	480	816	481	668	486	623	268	365	333	1526	541	666	338	202	741	480	456	268	352	636	672	362	751	933	590	518	461	405	430	768
ENSG00000013441.11	1972	3913	3742	2441	5304	1535	5481	3024	2802	2187	2393	7166	11207	7986	2436	6685	2177	4055	4461	1376	7169	3696	2163	1949	6393	5901	2277	1213	3429	1570	2867	3523	2996	6282	752	5058	1731	2187	5582	5184	6656	6964	3945	5414	4203	1478	2116	1820	6932
ENSG00000013503.5	1611	1179	2164	949	1135	859	1554	612	2165	1705	1308	2346	2289	1658	965	2473	1390	4210	839	865	2746	1541	1364	858	1542	1470	918	2134	2171	1220	1411	1152	1151	1317	1756	1517	1442	2169	1547	2398	1268	2035	2188	2391	2957	1499	1010	1677	1985
ENSG00000013523.5	1983	1157	1300	1249	1431	1337	719	1111	1242	1193	1239	1202	1576	1395	2147	1663	1298	1126	473	1517	1476	1548	1717	1183	864	714	1086	1578	1080	751	1187	725	926	1297	1108	762	932	1753	981	1223	850	1257	1302	1874	999	552	1500	837	1082
ENSG00000013561.13	3858	3611	5822	5864	4635	1489	6691	2199	6341	2692	3328	4527	6568	5139	2579	7444	3372	8119	3760	3542	6280	5082	2057	2069	4379	5108	2325	4144	6871	2432	5739	2829	3067	4319	4568	4749	3501	3969	5379	6502	5319	7192	7526	5710	6638	2357	4085	3868	6468
ENSG00000013563.9	7264	5275	2748	1504	6333	1095	8279	2364	1959	1795	871	2063	8696	6564	4737	4861	1421	5906	305	4987	11127	5087	1475	2649	3053	2776	4261	5803	9631	1696	1063	2659	917	2544	3728	4962	1532	8014	1107	4293	7418	14655	4072	8654	2373	2645	3035	2523	4068
ENSG00000013573.12	1936.72	915	873.97	1246.55	1488.78	341.3	1030.41	751.12	1750.42	1832.25	2613.25	1413.76	1268.64	2262.66	1035.67	1135.47	4869.58	3023.83	256.88	349.71	1268.18	310.21	458.84	796.34	412	978.52	443.1	1206.47	669.12	331.82	3189.58	1152.37	943.78	795.15	1764.39	1322.49	4792.44	1214.98	1342.42	1584.82	696.59	1433.86	1672.21	2538.32	2906.6	493	120.04	350	1050.03
ENSG00000013583.4	1198	438	640	315	619	1506	354	894	487	378	609	203	1903	1472	1381	625	479	491	626	1032	965	1092	1936	1119	365	160	322	306	582	814	582	264	455	377	513	224	433	1084	922	1306	1433	1555	627	1534	405	492	295	1694	397
ENSG00000013588.5	10327.36	563	12642	2289	594	283	776	1467	1394	3558	6592	2032	124	630	10950	2303	13983	5711	908	1828	1909	1087	429	1365	3318	2164	868	12065	1513	2291	7011	868	275	48	5016	1977	19440	20849	320	536	150	401	1825	2023	3458	2764	49	2071	3595
ENSG00000013619.9	475	125	105	364	89	141	137	257	188	118	316	23	136	253	516	115	382	138	25	410	135	219	156	370	761	12	191	135	99	364	513	81	95	779	244	22	236	152	135	208	140	89	42	289	77	347	187	693	1286
ENSG00000013725.10	0	0	0	15	3	0	0	0	0	8	106	0	1	2	28	0	26	0	0	13	0	8	0	24	0	0	0	0	0	0	37	0	0	0	0	1	0	0	0	0	0	4	0	0	2	0	0	0	1
ENSG00000013810.14	5690	1074	783.53	598	1990.42	255	1001.42	1119	1655.05	2783	1063.73	108	520.23	1175.66	1120.74	187	7618.32	5986.02	28.72	1149	2484.76	247.97	222	1787.57	543.37	88.03	558	3016	621.11	544	1140	810.77	897.69	343.31	2968	72.64	9559.58	4945	118.06	2550.93	374.6	1846.89	974.97	3307.75	3752.24	652	135	181	857.54
ENSG00000014123.9	2490.39	2948	5340	3073	2880	1903	4592	2061	4844	2564	3016	6307	6910	3221	2476	6646	2851	6957	2083	1746	3917	3930	2999	1443	5656	2220	1840	5446	5011	2608	4457	2153	2988	5397	3940	3636	2826	3461	5077	7102	3379	5880	7781	5564	7645	2022	3304	2577	6717
ENSG00000014138.4	2956	1432	1189	909	937	471	787	686	2237	2071	628	135	613	801	614	518	3142	2301	204	726	1253	365	299	838	541	123	798	2049	633	563	1032	540	864	513	2016	149	4634	3651	290	1225	335	1355	744	1519	2558	469	306	609	857
ENSG00000014164.6	1058	871	678	747	476	633	459	856	1099	585	1650	700	979	792	1736	542	600	577	71	650	804	1298	844	1203	791	294	710	441	633	334	1235	314	655	1027	932	665	1163	826	589	1292	618	1000	801	1294	659	670	786	1016	671
ENSG00000014216.11	19084	12679	9348	7873	9955	5048	7693	6224	13555	29945	22778	13031	9586	7788	25839	4232	20191.84	19032	1918	11456.99	13690	14139	5467	8203.01	6247	11343	9973	20818	10631	9246	24604	3719	8874	12877	18999	14352	19953	16097	5336	14163	6924	14564	8704	15392	11365	11217	10643	13856	7191
ENSG00000014257.11	0	0	672	1	0	39	1	202	960	226	26	32	0	0	20	5	6	5	0	2	2	57	63	0	0	115	0	786	5	84	9	0	425	12	236	479	0	0	49	394	0	0	746	0	2268	15	4	204	1
ENSG00000014641.13	6332	2861	7471	8668	5358	2952	8419	3973	9672	6894	4227	5628	8497	5648	6251	9323	9067	11693	1984	4347	8442	7914	3966	2833	5040	4294	2429	10312	10844	4173	6871	3748	5614	4766	8911	4933	9133	5814.86	6877	13002	6812	10598	11145	7544	11592	3690	3037	5402	6332
ENSG00000014824.9	4556	5418	10096	6152	6537	1921	10127	3757	11239	4781	6054	8701	14527	9574	5656	11468	7571	14775	1843	4042	10755	6895	3422	3174	8865	7386	4158	8406	13677	4331	8340	5524	5892	6980	8173	8398	6424	5758	9211	11434	7543	13260	13809	10270	14418	4716	4421	4955	9675
ENSG00000014914.15	69	115	471	170	25	309	513	513	401	653	1065	86	19	71	2318	535	646	430	228	150	277	845	313	237	977	81	170	713	516	316	1047	155	271	1582	630	190	582	479	580	1271	24	67	622	28	423	376	673	295	1355
ENSG00000014919.8	2946	2405	3790	2711	3245	1498	2599	2641	3219	2718	3204	3764	5710	3454	2712	3972	2447	5616	1927	1990	4416	4271	2180	1055	2183	2941	1896	2786	3958	2058	4269	2627	2588	3124	2593	3126	2714	3279	4373	4665	2796	6606	3628	5617	3344	2122	1589	2101	3527
ENSG00000015133.14	3244	4547	3	0	5133	163	134	113	69	3917	4807	3812	3304	4897	3636	140	4001	152	0	4069	7825	23	180	4577	6	2955	4324	27	214	186	5603	1588	0	0	170	2989	4087.09	1056	88	11	3017	4063	87	6763	29	329	4	145	31
ENSG00000015153.10	672	1166	1496	844	1286	582	801	1211	1305	283	1057	910	2256	1994	565	1961	737	1199	538	755	1457	719	630	920	1658	880	671	1201	1326	624	1144	914	787	1062	1034	971	513	807	892	1349	1348	1897	1414	1373	1730	499	998	512	1957
ENSG00000015171.14	4825	5507	6194	4222	5201	2882	11503	4069	4774	2713	6030	8138	15239	9361	3765	8512	3664	9073	3155	3328	8646	6034	4458	3735	7172	5997	3392	3990	9210	3404	8898	3568	3871	6030	4435	7495	4394	5292	9199	7516	8778	10511	9618	10627	8485	4437	4485	4236	8364
ENSG00000015285.6	0	1	4	0	0	24	1	24	0	3	2	4	2	8	31	13	0	0	0	6	4	6	23	9	3	2	4	2	11	0	82	5	4	1	5	0	16	0	4	2	3	0	6	8	5	2	5	6	4
ENSG00000015413.5	0	4	0	0	20	0	1	259	0	0	136	2	17	62	1821	6	271	0	0	0	165	11	3	59	0	10	13	0	6	0	57	13	0	6	8	0	32	0	3	0	9	19	0	62	0	14	2	162	0
ENSG00000015475.14	5042	2040	1025	531	2811	769	463	636	1998	1701	1864	1064	6684	3116	1548	1269	2589	2026	134	2975	4437	1266	839	1992	473	1091	2059	1660	1186	1099	2325	1189	982	410	2810	743	2929	4089	1045	619	2951	5692	896	3300	825	865	330	1262	627
ENSG00000015479.13	20673	26729	26332	16036	27430	10374	22632	21765	23960	19120	22200	27762	66245	36523	13067	32681	25698	41834	22564	13689.94	44413	23370	15745	12370	28730	25670	16286	22742	34944	12292	29641	19810	17480	26864	24897	21372.96	26981	20015.25	40943	45125	29469	50688	32162	55764	40944	13681	15797	17041.69	35347
ENSG00000015520.10	0	1	0	0	6	1	0	32	0	0	146	3	0	0	250	3	39	5	0	1	0	25	0	0	4	3	0	0	0	0	261	0	7	7	1	4	164	0	5	17	0	0	17	0	4	21	0	0	0
ENSG00000015532.5	4730	2172	5739	2680	3038	2068	7196	2570	7286	5113	3546	3569	3186	3211	7332	8375	4514	13348	986	4081	5345	8308	2479	2904	2639	2319	2121	7645	9388	5004	3913	2283	2876	3387	7170	3169	4182	6084	4443	7372	2864	4126	8515	4396	10190	4586	4622	4058	3403
ENSG00000015568.8	945.04	3821.61	2660.47	944.97	1902.61	551.08	2625.11	1017.1	2098.25	2895.95	1281.67	2639.4	7257.47	5982.11	661.93	2859.34	1736.25	3944.14	367.87	2208.95	5771.8	1737.7	1785.44	1546.33	3706.8	3487.89	1580.15	1052.97	5379.35	1409.17	1789.54	3168.92	1789.97	2032.89	545.13	2484.48	1566.37	1474.67	1621.97	1973.21	3661.67	5985.67	8127.46	3754.47	4433.52	659.82	3561.23	1606.05	5538.05
ENSG00000015592.12	0	0	0	0	0	0	0	0	0	0	0	0	0	0	0	8	0	0	0	0	0	0	0	0	0	0	0	0	0	0	0	0	5	0	0	1	0	0	3	0	0	0	0	0	4	0	0	0	0
ENSG00000015676.13	8699	6269	5861	5286	10140	2623	9252	3961	9796	3869	8643	7613	12462	12094	8074	10064	6012	13435	2773	7466	15038	10276	3774	5650	4405	5895	5348	5795	12554	3126	9318	5870	5695	5388	7877	5399	6827	8982	7306	10676	9019	13153	11480	13467	14001	3554	4696	4486	6063
ENSG00000016082.10	0	0	0	0	3	0	5	0	0	174	0	278	2	0	0	0	0	0	35	0	0	0	0	0	0	270	0	0	1	88	14	11	4	0	1	116	0	209	0	0	1	0	150	0	342	1	0	0	0
ENSG00000016391.6	0	16	49	43	17	4	11	5	0	16	417	11	10	167	603	24	1216	0	108	12	1	109	18	10	756	5	2	5	10	12	431	3	37	998	13	14	1007	0	275	37	24	40	199	35	73	0	214	16	1107
ENSG00000016402.8	5	15	27	0	0	8	12	60	58	350	51	611	62	91	218	36	0	12	53	9	1	43	53	4	26	517	22	138	0	0	57	0	41	51	42	1212	22	0	114	74	55	74	67	101	114	0	19	10	48
ENSG00000016490.11	0	0	0	0	0	0	0	0	0	16	0	2	0	0	0	0	0	0	0	0	0	9	0	0	0	0	0	0	0	0	0	0	0	3	0	27	0	0	1	12	0	0	0	0	5	0	0	0	0
ENSG00000016602.8	0	0	0	0	0	0	4	0	0	341	0	29	0	0	0	0	0	0	0	0	0	0	0	0	0	1365	0	0	1	0	0	0	0	0	0	5092	0	0	0	0	0	0	0	0	0	0	1	0	0
ENSG00000016864.12	2545	1519	3259	1331	2037	2125	4375	3348	4079	1892	1320	2193	3023	3551	3902	4575	2234	5086	1142	2164	3369	4202	2447	2109.09	3249	1761	1516	4726	6225	2411	1859	1548	2387	2669	4144	1924	1994	2439	4107	5121	2112	3090	4969	3036	3928	3460	2203	4012	4148
ENSG00000017260.15	5135	5779	10858	7008	7414	4037	7776	4233	8700	4666	8941	13138	11749	15671	7360	17753	11123	22420	4043	5859	12447	11049	5851	5458	6444	6960	3636	7625	16962	8498	12078	5099	4894	9702	5853	9296	9031	7193	11000	15333	7853	10266	17439	16468	14979	6569	7584	5687	9038
ENSG00000017373.11	0	5	0	5	0	5	3	0	27	1	32	42	2	14	50	4	81	0	0	25	6	18	4	0	8	12	3	0	3	0	151	0	0	15	0	36	3	17	1	9	7	4	14	7	3	0	0	10	9
ENSG00000017427.11	35	79	23	188	23	8	3	40	0	0	0	1	182	58	42	72	23	3	247	74	15	56	36	9	1141	13	52	0	1	0	4	0	0	146	33	0	0	0	115	13	77	113	23	85	0	0	16	94	252
ENSG00000017483.10	1978	1500	493	8	1355	186	903	1900	9414	2625	1332	7732	89	495	1198	2047	1028	2915	98	128	4735	2020	408	273	901	12731	284	2569	1327	1819	1356	740	3848	1099	4368	5665	3038	2191	1136	3509	284	2375	1708	1301	2715	1108	827	557	916
ENSG00000017621.11	1	39	72	55	44	9	86	9	60	37	67	82	32	46	198	106	271	88	64	38	33	181	52	19	120	110	17	26	105	57	135	70	29	98	130	171	225	57	62	144	48	48	81	48	61	73	83	38	111
ENSG00000017797.7	7955	7547	7516	3292	10673	3176	7127	4368	7103	6475	5249	9811	13651	10110	7077	8511	6494	10311	6659	5709	12923	9427	4551	5453	7704	6958	5574	5967	9588	3753	7166	4656	4763	8397	6627	8808	6736	6491	8409	10907	9667	12358	7480	17527	9103	4030	7661	7245	9494
ENSG00000018189.8	1332	3160	4821	11593	2402	1491	2919	2499	3743	1382	2263	3212	7087	4507	1875	6705	2251	3664	4129	1539	3006	6194	1395	1373	3860	3340	1844	1486	3709	832	2581	1726	3502	8489	1545	4572	1613	991	7117	10007	2812	4024	9904	4330	7012	829	3768	1576	5494
ENSG00000018236.10	0	2	207	2038	0	0	91	1	6	5934	46	213	0	0	209	160	478	215	33	3	5	474	0	83	2	408	4	4	3033	0	130	22	35	4132	131	5637	278	4	49	1023	0	0	3076	3	5550	0	354	0	3
ENSG00000018280.12	9	7	39	15	27	0	29	1	0	1	1	16	26	15	64	42	0	24	16	3	8	37	1	0	37	13	6	18	30	3	21	1	10	33	28	25	12	0	43	6	25	24	36	6	11	4	4	55	22
ENSG00000018408.10	9592.53	35514	4758	4447	9489	6784	18211	12396	16192	4416	5895	1064	58233	20568	18036	4572	7879	11188	4597	13407.96	17153	4012	10706	13393	15240	477	34113	3002	21058	8473	6744	9985	7526	11896	7421	1161	15776	9457	2501	7437	25816	28666	4287	41321	4283	5726	7809	5292	27012
ENSG00000018510.8	11152.44	8721	6760	6028	11844	2507	6544	1483	8313	3702	4913	7114	16806	20382	4739	8374	6937	13838	3247	5509	17380	4882	4185	4461	6155	5861	6548	3612	18806	3932	6546	9388	4177	4164	7223	5832	8080	14185	5001	4724	14722	22658	8291	22562	5128	3849	4112	3430	7632
ENSG00000018607.5	0	0	0	1	0	0	1	0	0	0	0	0	0	0	0	0	0	0	0	0	0	3	0	0	0	0	0	0	7	0	0	0	2	0	0	0	0	0	0	5	1	0	0	1	2	0	8	0	16
ENSG00000018610.9	1538	829	1067	648	1965	694	1502	564	1185	908	620	1830	3131	2160.05	925	1901	547	2534	390	840	2863.19	1228	765	669	1090	2245.29	564	998	1951	727	1180	1173	491	1091.97	909	1997	1357	1338	1830	2162	1982	3100	2061	2803	1617	549	566	674	1275
ENSG00000018625.10	0	0	0	0	0	112	8	31	757	0	7	2	0	0	3	53	0	0	2	0	0	668	197	0	38	0	0	0	19	132	5	0	0	14	37	0	0	0	5767	57	0	0	41	0	0	0	0	125	43
ENSG00000018699.7	2765	2081	2253	1495	1786	599	2236	410	3259	807	1569	3483	4059	2942	1181	3074	1707	4850	434	920	3510	2052	878	771	1862	2236	956	2359	4093	836	2302	1701	1383	1735	1939	1590	2843	3885	1974	2832	1853	3524	2684	3485	2842	1338	1083	1249	2141
ENSG00000018869.12	54	112	156	179	144	139	155	184	171	98	182	193	317	217	345	226	54	242	146	76	175	187	187	142	203	98	98	20	196	85	114	40	114	164	126	160	80	51	283	208	280	186	151	204	79	170	163	193	191
ENSG00000019102.7	16	22	4	0	59	0	3	2	0	71	2	3	6	17	4	0	15	0	0	2	30	11	0	22	0	19	5	49	2	0	19	9	0	0	51	76	11	17	1	0	3	14	19	10	7	0	0	1	0
ENSG00000019144.12	12579	9619	13403	2429	6864	10457	15196	6892	21362	4544	7780	1128	3322	8055	21267	8499	6448	17808	2757	8728	12789	14538	12163	8873	11354	1425	8983	6717	19604	8169	9507	4239	16842	13805	16849	972	6972.97	8748	6257	12533	1820	4505	7470	5653	7036	9878	10383	18220.07	15700
ENSG00000019169.9	0	0	0	0	0	0	0	0	24	0	6	2	0	0	0	0	0	0	0	0	0	0	0	0	2	1	0	0	0	0	21	0	0	0	0	5	0	0	1	0	0	0	0	0	0	0	4	0	0
ENSG00000019186.5	0	0	0	0	0	0	1	0	0	329	52	242	0	0	0	92	161	61	21	0	2	0	0	0	14	417	0	0	42	0	5	0	0	125	149	326	86	0	11	0	0	0	0	0	0	0	0	0	52
ENSG00000019485.8	513	537	510	333	588	362	365	175	189	330	652	681	964	918	1104	861	376	491	170	326	702	519	306	345	357	446	605	188	624	599	550	496	275	642	197	458	581	431	438	217	862	839	305	1140	253	643	650	1216	402
ENSG00000019505.3	0	2	0	0	0	0	7	31	0	0	1270	0	1	18	2425	22	971	86	0	6	0	0	0	9	11	0	0	0	443	0	1902	0	0	0	0	0	1177	0	0	0	11	3	0	0	0	0	0	0	50
ENSG00000019549.4	82	144	4354	6116	209	6075	668	7981	5902	2267	1394	759	781	67	1484	1805	47	2219	2565	681	10	3918	9304	922	5693	1083	17	3282	911	5446	1981	8	3288	2692	4204	473	339	233	1718	4294	385	456	979	250	1380	4269	6151	7376	11218
ENSG00000019582.10	486	33	78	834	474	37	52	49	58	208	3896	90	13	175	4652	41	2066	14	10	477	20	191	50	796	60	46	21	326	6	19	4769	10	13	81	277	164	980	326	123	17	238	60	14	104	10	0	138	24	222
ENSG00000019991.11	127	566	4509	13	345	23613	116379	46694	27197	52	1	0	101	92	0	38028	0	22211	2345	48	12	10695	34819	120	16	590	178	27164	3348	13195	1	173	40333	2262	14280	6	0	1954	19707	34840	42	210	15243	1447	76178	15712	119	5279	74
ENSG00000019995.6	2242.22	3309.23	6551.65	2556.46	4500.05	1695.39	4916.25	3480.34	3033.44	1794.15	2956.93	9301.4	8236.02	5676.74	2697.43	7604.76	2714.99	5334.29	1983.09	1884.92	5978.03	4479.12	2797.73	1758.96	8059.66	5986.71	2244.92	5190.76	6512.79	2709.24	3356.7	2403.97	2163.13	3982.83	4275.42	5491.86	2478.25	2229.68	7834.14	6180.35	5441.64	6431.38	6769.97	5402.41	5906.83	3120.35	3419.63	3143.72	7790.53
ENSG00000020129.11	1299	1566	2061	3158	1041	2968	2626	2748	5737	2328	2787	1544	2463	1700	5225	3010	1585	5058	2758	1835	1822	6857	3432	1920	1891	1126	1447	2839	2804	2704	3173	632	3480	2765	3583	1058	1801	1951.02	2623	4109	1231	1861	3558	3183	2821	2413	2484	3445	2877
ENSG00000020181.13	2698	3055	5999	2697	2267	6442	6252	20299	3659	260	2737	29	12769	6050	11180	9685	244	3356	4346	5452	4629	40808	8636	9200	4761	173	5072	8577	11260	7732	3088	2406	4368	21988	18595	41	99	1060	18432	27960	7418	7399	23394	11575	12225	7656	18876	22625	3406
ENSG00000020219.8	0	0	0	0	0	0	0	0	0	0	0	0	0	0	0	0	0	0	0	0	0	4	0	0	0	0	0	0	0	0	0	0	0	0	0	0	0	0	0	0	1	0	0	0	0	0	0	0	2
ENSG00000020256.15	1942	1798	1460	1000	1187	520	359	1737	1145	1235	2561	3270	2401	2600	3580	1051	3158	1146	379	2292	1875	1553	781	2377	1374	2366	1585	1156	2070	846	3686	1170	675	1000	2928	1697	3299	1734	1156	1895	2627	3680	1478	3625	1237	861	724	1114	1457
ENSG00000020426.6	1333	1435	1740	629	1200	234	1317	592	1590	1391	991	2773	2122	1482	643	1755	1821	2297	1006	839	2544	1033	273	610	1302	1601	884	1170	1791	506	1449	1227	875	1339	1271	2228	1561	1057	1381	2618	1043	2137	1958	1656	2246	417	641	618	1694
ENSG00000020577.9	10853	7508	9500	3424	6305	893	3817	1605	4638	942	3251	2148	4203	21444	7727	6367	4270	3424	892	7989	6571	7412	1187	9973	10514	2527	8572	1927	3181	2971	2996	2299	2050	8101	1983	2530	3869	7036	5917	6086	10069	8147	4160	10127	5227	3216	6835	2793	9535
ENSG00000020633.14	0	0	0	1274	0	2	0	4	0	207	51	9	1	0	1	0	0	0	0	0	0	12	0	4	2	33	0	1	0	0	53	0	0	554	145	19	1	0	44	0	0	0	5	1	0	0	622	0	1
ENSG00000020922.8	1595	1232	1239	1063	1632	424	1338	559	1445	726	648	1035	3362	2036	477	1379	1514	2551	605	618	2371	955	516	594	1297	1279	822	899	1364	528	780	1224	1245	1188	918	619	1555	1182	1043	2061	1499	2981	1492	2493	2710	580	603	666	1244
ENSG00000021300.9	9	0	5	73	8	25	19	69	0	0	128	0	32	67	832	27	174	9	36	21	17	130	77	5	47	0	24	1	44	8	100	11	0	25	18	3	110	0	70	77	12	33	68	23	7	2	2	121	63
ENSG00000021355.8	5815.56	1745	1418	947	4177	703	1694	1160	763	13032	2467	10105	1517	1259	949	942	2049	1984	366	2054	2162	1175	818	1103	3395	9153	1202	2237	1516	1083	3626	1758	1176	2200	1774	21840	1926	4980	1532	2380	436	4786	239	3525	474	958	1386	738	3901
ENSG00000021461.12	0	0	0	0	0	0	0	0	0	0	0	0	0	0	0	0	0	0	0	0	0	0	0	0	0	0	0	0	0	0	0	0	0	0	0	0	0	0	0	0	0	0	0	0	0	0	0	0	4
ENSG00000021488.8	0	0	1	0	6	0	2	0	0	0	79	2	0	0	2	8	0	11	0	0	0	22	0	0	5	3	3	0	3	54	1	0	7	2	0	9	16	0	17	0	8	3	6	1	0	0	0	0	15
ENSG00000021574.7	2804	3138	2639	1663	3514	1059	2494	922	1879	1960	2288	5284	7578	4424	1912	3149	2346	2947	1425	1711.02	5514	2498	1982	1611	2879	3015	2255	2368	3111	1457	3325	2262	1297	2430	2268	2931	1843	2636	3317	3639	4068	6508	3511	6373	2419	1337	1593	1642	3369
ENSG00000021645.13	63	54	915	175	29	15	10	3	5	143	161	15	1	28	995	685	161	326	27	100	632	16	46	432	1	4	69	340	6	600	194	10	59	46	304	0	256	24	110	13	1	3	108	5	38	455	40	675	7
ENSG00000021762.15	3454	2356	3651	4468	3687	2352	3429	5191	3947	1813	935	596	7272	4366	4034	3261	1248	3955	535	2497	2854	6834	2429	2144	3181	1485	2522	5206	3149	2883	1477	877	3352	5462	4455	1068	1082	3135	3374	6202	6204	9293	3882	9766	4280	3322	5696	3058	4201
ENSG00000021776.6	6502	7380	8268	3166	5524	1958	4905	3028	7341	4472	5053	5635	12124	8471	3776	5666	4814	7565	4198	3644	9335	5338	2639	3352	6683	4006	4491	4661	6192	3007	7019	4049	5104	7100	4761	4115	5162	5693	6305	8727	6241	11250	6985	11643	7827	3203	4493	4016	7955
ENSG00000021826.10	81	395	2356	2678	301	786	2010	1801	1947	1455	177	2472	257	80	932	4934	498	5040	1388	48	649	2931	988	43	2956	1626	291	1982	4864	1257	359	51	1657	3415	2277	684	305	149	3039	3770	43	607	2502	93	1695	1606	1965	1030	3902
ENSG00000021852.8	0	0	0	0	0	0	0	0	0	0	0	0	0	0	0	0	0	0	0	0	0	0	0	0	0	0	0	0	0	0	0	0	0	0	0	0	0	0	0	0	0	0	0	0	0	0	0	0	0
ENSG00000022267.12	10155	2870	6897	290	4181	3894	12358	9964	3284	1105	2549	9186	9311	9110	4954	8855	1160	4495	1566	4642	5199	8485	5209	3317	28248	3678	2911	3791	9557	7558	3260	1128	1918	7897	3928	3260	441	5030	11546	6929	12587	15124	6675	5059	3253	12815	8110	20135	35525
ENSG00000022277.8	5052	3986	4803	2959	6980	2333	5991	3569	4750	2895	3432	6264	12424.96	6639	3400	7035	3691	9465	1652	3546	10898	7414	2812	2167	4140	4150	3140	6183	10312	3237	5246	3994	2829	5284	5096	6127	4124	5002	7056	9370	8810.22	11523.66	6015	8355	7702	3988	3734	4537	5267
ENSG00000022355.10	0	0	0	0	0	0	4	0	0	0	0	0	3	0	2	0	0	2	0	0	0	0	0	0	2	0	0	0	0	0	0	0	0	0	0	0	0	0	0	0	2	0	0	0	0	0	0	0	0
ENSG00000022556.11	34	46	126	353	83	0	6	2	0	3304	2682	1131	85	1566	3930	52	3450	93	0	1157	47	50	0	929	0	1045	28	0	22	0	3807	20	38	0	100	4165.99	1335	206	8	18	296	0	3	1043	20	0	0	23	66
ENSG00000022567.5	141	277	315	386	276	330	459	249	407	830	1231	1137	18225	1819	1008	500	965	725	263	990	1291	608	375	1919	492	610	223	181	689	307	1933	995	196	516	379	1417	948	198	423	412	4669	7869	749	9187	385	357	295	528	521
ENSG00000022840.11	10424	7819	8480	3308	6482	4183	5352	6567	8525	4762	7498	7759	6856	9602	8724	5044	6772	8698	2282	7150	7462	7354	5191	5680	6776	5174	6166	8567	5048	6792	8643	2499	4998	5605	8962	6769	7167	10585	4695	9730	6349	8154	6608	15476	5632	5581	5513	8088	7827
ENSG00000022976.11	489	534	655	752	670	209	653	418	801	732	650	665	907	558	641	733	1482	961	131	499	731	609	390	451	594	614	452	731	699	363	935	411	464	818	777	716	666	469	651	899	392	716	1094	625	1020	403	397	461	685
ENSG00000023041.7	1684	1558	1856	902	1766	547	1624	712	2166	773	1100	1734	3279	2246	532	2082	1043	3248	433	1158	2994	1577	847	913	1430	1544	1028	905	1924	718	1541	1400	1089	1029	1292	1393	1561	2810	2231	2307	1916	3348	2473	2348	2655	1010	777	1130	2316
ENSG00000023171.10	1875	463	641	313	158	5	793	197	255	99	356	23	414	168	1916	1327	397	1309	199	476	289	203	4	378	774	21	127	517	137	252	652	188	5	3801	19	133	287	5777	26	378	298	1116	347	1106	607	115	1690	43	854
ENSG00000023191.12	18381	8348	11857	11588	13959	14415	24889	9058	32473	17794	12332	22556	16047	14592	21070	12119	9396	19064	9087	6830	15916	35177	15831	8661	13530	18864	7241	22148	27919	18546	14124	4801	20108	18040	24028	23724	11655	14820	28437	34026	11613	21849	28590	19335	23771	22744	14987	38971	16453
ENSG00000023228.9	9486	10849.47	14801	10309.07	12499	4941.16	13789	5327.26	12634	8356	8477	10516	19288	16327.12	7615	15837.68	9798	23385.03	7618.02	6198.98	18960.01	12384.75	7748.7	5953.73	11167	8107	6651	12644.17	16850.27	5468	11580	9917.41	9844.91	11679.73	10758.96	7735	9471.02	11468	12643.4	21813.5	13899.54	24114	17887	21251.96	22063	5332	8109	6947	13989.14
ENSG00000023287.8	5735	8204	9707	6189	7440	3684	9595	6784	7547	2999	6964	16919	22273	9779	3730	16329	5764	14101	6797	5080	11804	11355	5186	3684.35	12443	11069	5890	5006	11753	4390	9634	4748	6564	11027	6748	9807	4893	4584	17268	14758	10710	15271	17769	15995	14303	4472	7266	5222	17050
ENSG00000023318.7	3189	2284	3328	1411	1296	1885	1691	1979	3577	1854	2956	2294	2602	2660	1699	2732	1444	2644	720	2844	1836	1524	2497	2800	3483	1132	1706	3373	1613	3583	4208	936	1677	1846	2963	2181	1700	2890	1421	2434	1761	2060	2493	3444	1763	3225	1435	3942.08	3580
ENSG00000023330.10	4234	4371	3243	4717	3085	827	1726	2548	5644	2261	2871	5279	3975	3143	3334	2160	3882	3121	681	3920	4999	4116	1004	3038	1812	2389	3307	3212	3025	1595	4172	1531	1882	2542	3808	4716	4574	4077	3154	3763	2225	5150	3045	4160	3593	1045	2218	2071	2183
ENSG00000023445.9	2156	572	1182	1156	597	7	147	96	483	259	1065	554	303	2850	1028	1555	3216	306	18	766	368	253	8	782	448	187	226	101	49	88	1552	773	45	70	797	248	2983	1132	659	72	565	581	109	736	170	4	120	16	1493
ENSG00000023516.7	4030	7417	10124	6808	5006	4784	8584	10234	9140	3698	6469	9413	14956	14171	5895	12210	3547	14167	6604	5724	9808	9760	7314	5179.07	9937	4855	4977	5802	6697	3837	7913	3107	7646	9733	11218	6052	2919	6643	11050	14282	9069	11070	14432	16169	15225	3522	5764	3659	16665
ENSG00000023572.4	375	180	459	273	292	105	395	201	642	390	278	304	309	351	130	451	399	775	64	159	534	219	115	94	350	248	112	353	446	314	272	174	398	253	300	320	396	299	249	465	349	575	467	345	514	119	117	197	382
ENSG00000023608.4	1554.02	1210.67	2129	428.59	960	618.79	1009	524	2439	728.49	809	1839	2846.4	5775.19	767	3696	2521	3529.38	1030	670	1767	708	899	660.79	6362.96	1548	2204	1143	1220	1151	1564.32	1827.62	908	1075.61	1478	699.55	2779	448.74	2086.97	1022	3063	1631	1038.38	2992	1866	1495.59	802	613.39	5073.32
ENSG00000023697.8	3709	2510	1908	2374	3537	812	1665	1689	3912	3158	1557	2737	3745	2134	1626	2113	2778	3950	771	1706	3706	1948	1248	1038	2395	2401	1614	4376	1948	1174	2221	1672	2120	2024	2836	3947	3725	3310	2094	4300	2262	4413	2234	3570	3919	1684	1486	1886	2799
ENSG00000023734.6	6498	4773	4766	2952	3711	2802	3826	4028	10310	6215	6536	6822	8252	4669	4948	3678	7604	9318	2460	4010	8471	3051	3374	2648	5053	4761	3451	8788	7520	6361	9543	3272	4384	3158	9142	4826	10258	8153	3194	6707	3931	9321	3886	6795	6100	6041	3590	5904	5307
ENSG00000023839.6	76	122	58	7765	81	34	23	107	512	42	3	77	129	64	25	55	9	23	26	15	105	47	69	42	86	91	66	9	27	37	5	55	1644	54	35	79	23	126	52	61	47	127	57	127	108	81	54	82	79
ENSG00000023892.9	37	29	78	9	34	23	4	161	0	2930	243	2019	157	94	289	46	503	89	39	134	43	43	30	59	59	1979	55	459	53	0	267	17	15	12	225	1893	328	118	31	77	26	82	72	81	84	66	6	53	67
ENSG00000023902.9	5940	1801	2591	932	5455	1177	1882	2320	1777	479	4436	388	3124	4603	3725	3332	5134	2322	1446	7112	5350	3122	1356	7100	1901	448	1842	1852	4902	917	5220	1885	2128	2512	4007	216	3918	2717	3738	3543	3313	3383	5244	2278	5141	1112	2457	1834	2248
ENSG00000023909.5	4773	4413	4504	817	4157	3775	2816	1723	4327	2206	1347	1433	3238	2513	728	3014	2654	5544	1068	2687	4789	3514	5690	1799.19	9534	965	1501	2616	1197	4422	2120	2558	2345	2159	3932	1504	3959	7615	2895	4182	1439	4736	5956	6076	5407	2531	2652	1340	10094
ENSG00000024048.6	3667	5965	7626	5092	6836	2937	7712	2864	6225	3011	3485	8933	14657	10655	3370	11070	2517	10352	4120	3476	8563	9151	4051	3004	8008	4778	3282	3771	8363	2987	4107	4222	5922	8847	3551	6473	2808	4329	9489	11390	8521	13419	12017	13630	10204	3543	5880	4174	12207
ENSG00000024422.7	24014	14082	14658	1447	15596	30961	13150	29669	27181	13048	3885	6434	15481	23492	23923	14999	6890	16086	3337	23459	13091	37775	35421	20142	14593	5816	12811	16893	13487	23069	4398	4198	12570	21039	21948	6183	4186	22208	12472	27980	12984	16735	20197	44523	16522	30699	19175	36782.96	14687
ENSG00000024526.12	4348	1881	4242	2077	2503	90	3010	1175	4064	2214	642	129	785	1700	303	840	5542	10680	46	280	4760	249	171	587	1031	19	729	3979	1187	690	881	2357	2793	475	4193	79	7435	4274	124	5186	392	4288	3506.92	5336	9492	599	175	116	2219
ENSG00000024862.12	529	238	433	259	748	169	552	503	267	235	495	494	1758	669	529	534	416	689	170	312	856	363	216	277	384	410	196	826	753	373	508	326	270	510	666	450	328	889	893	1147	684	1448	782	1079	756	334	164	344	652
ENSG00000025039.10	479	62	26	4566	109	85	547	27	241	232	4379	962	123	131	1015	1437	2362	62	1316	492	20	213	30	375	1002	622	30	2	166	64	6577	33	305	1093	206	1002	1129	0	354	112	118	80	622	64	464	1	172	206	3003
ENSG00000025156.8	869	877	1729	933	744	656	798	853	967	648	710	1349	2315	1302	870	1731	1299	928	824	436	1208	1295	755	763	990	881	568	1008	1206	793	918	914	687	1336	1098	731	1383	1209	1563	1930	1255	1978	2255	1328	2186	977	986	878	1503
ENSG00000025293.11	3991	3632	4100	1762	3322	2119	3504	3502	4216	2691	3710	4452	5708	5227	3688	4869	4047	6668	2345	4440	5622	4951	2818	3348	7792	3327	2728	3176	4525	2211	4817	1662	2307	5032	3719	2977	2808	3900	4198	6018	3466	4987	5227	5920	4794	2543	2763	3578	9722
ENSG00000025423.7	2	0	134	25	5	16	22	105	33	32	14	8	6	21	33	132	14	48	49	0	8	11	24	0	19	3	3	115	29	3	37	9	41	20	23	0	18	2	72	18	2	19	1050	9	132	1	20	24	37
ENSG00000025434.14	460	102	1285	416	592	748	698	1888	930	283	219	642	3756	510	767	620	230	1054	283	148	237	1958	906	86	309	403	196	1577	798	616	181	309	1710	468	1332	401	283	169	2455	1210	1453	2302	647	1762	645	711	347	845	412
ENSG00000025708.8	1828	225	754.83	15085.11	2601.79	1058.77	771.72	1463	3160.08	2582	2758	6642.93	2276.62	1624.11	2405.29	839.66	716	498	631	453	279.99	2380.08	1636	758.95	2970.49	2968.83	304	1409	772.39	1862	2919	719.93	2108.4	1192.43	4675.27	6967.06	396	816	2517.18	1249.93	1352.43	1315.1	744.97	1838.4	317.66	2303.98	2554.86	3290.87	2664.82
ENSG00000025770.14	4484	1272	1494	1757	2766	711	2385	764	3123	2829	2173	1885	1631	1838	2128	1282	4089	4499	923	1056	3076	1665	855	1023	1128	2118	1188	3756	2350	1193	2631	1295	1800	1310	4232	1879	5276	3247	1492	3207	1219	3031	2339	2914	5388	1127	958	1653	1293
ENSG00000025772.7	4825	2278	1297	917	1174	947	1607	1420	4578	2519	4154	1415	2175	965	3681	1848	5324	3726	239	2210	3008	1916	1079	1526	834	1202	1382	6747	1882	2185	4528	798	1388	1393	4500	1796	6508	4286	837	1898	1345	2021	3157	1833	5655	1265	1000	1390	1105
ENSG00000025796.9	1568	2106	2889	1076	2200.99	4063	2983.97	3705	3230	2119	3634.97	7473.95	5890.99	4379	2273	3914.99	1008	3824.99	2236	2344	3593.99	2995.99	5677	2857.99	3606.96	3037.98	1448	2138	4082	2708	4948	1159.97	1709.8	2729.95	2975.96	4444	1075	1897	4279.99	4867	2229	3937	5824	6965.99	4250.99	2693.97	1593	2871.96	3917
ENSG00000025800.9	12796	17237	22515.59	10135	6932.3	4673	7736.54	8658	14506.02	9928	10612	11377.01	13677.37	11152.35	12061	10576.14	11361	18209.56	5655	10488	11986.23	12222.64	6794	8273.68	15100	6386	12353	12424	9946.22	8509	13779	5717	8965.75	12019.37	13488	8513.11	13002	14238	8434.75	12226.93	9632.1	15135.26	10233.54	15939.28	10547.54	8266	11717	9722.61	19556
ENSG00000026025.9	409598.61	456497	235012	168493	253566	422918	429470	214554	867303	30035	280580	4183	599706	322637	561684	212685	309716	424892	305167	555418.33	490777	889903	537314	340040.13	506900	7017	490340	482130	434332	324039	340727	152634	539052	1577566	387490	1586	304237.18	316153.69	323950	772171	230197	537579	420880	510816	468107	426360	1066770	438809.99	491078
ENSG00000026036.16	3993.07	819.33	1400.83	959.57	1454.61	244.38	1330.32	767.59	1364.77	1254.8	2150.89	472.66	457.1	1213.47	4120.06	1040.24	8666.57	1941.38	337.05	2390.26	1917.18	1278.36	803.24	1641.26	909.59	478.98	1331.53	2507.15	1011.86	382.89	2016.12	660.83	1466.73	1672.71	2206.9	401.49	6042.74	2353.76	801.72	3050.48	583.78	915.6	2261.77	1218.23	3595.09	424.48	569.54	1257.97	800.76
ENSG00000026103.15	1127	736	4608	1227	1025	1172	4143	1237	3366	747	1946	2140	604	1505	836	5240	2988	5075	953	1043	1542	3805	1978	495	1538	1634	289	2565	4009	1547	2998	291	3440	2869	1426	920	1973	417	5469	4572	165	813	4031	1266	3249	1296	2575	2390	3182
ENSG00000026297.11	948.52	175.24	725.52	222.7	468	951	1812.37	372	515	1310	3749	406.84	1305.73	478	6408.02	1919.32	14462	658.68	1227	980	361	2067.82	909.13	562	797	488.47	201.81	1439	1183.93	1515	5658	295	374.12	1375.9	1553	535	2387	1362	1067.68	914	279.03	885.08	1624	418	535	1944	401	1304	2803.18
ENSG00000026508.12	6061	1844	52562	18502	2245	15177	25476	21583	42603	21506	26212	13384	244	1591	9036	30181	30832	41559	7191	7856	12140	66382	21269	6305	45811	12518	2521	56506	18545	14213	31123	5454	26924	71001	55054	12218	20447	31259	56653	86807	109	1355	43537	562	46555	7070	38331	5399	53589
ENSG00000026559.9	118	126	166	65	314	228	9	651	826	1450	2793	9377	174	87	2364	847	722	396	416	545	573	817	151	879	162	5301	66	2705	565	311	3191	63	201	18	15321	5443	158	25	1733	224	172	298	6403	40	5056	323	105	940	71
ENSG00000026652.9	1197	1293	1712	789	1936	513	1119	1291	1798	598	1922	724	3255	2479	1885	1345	1957	1028	692	1663	1863	1946	710	1743	3241	530	1070	1437	1987	515	2446	719	2396	2451	1756	978	1595	1222	1520	3000	3446	3257	2454	2626	3183	499	1724	1135	3823
ENSG00000026751.12	0	0	0	0	0	0	0	34	0	11	3	222	0	0	0	2	3	0	0	2	0	0	0	0	0	66	0	0	1	0	9	0	0	0	53	307	0	0	0	0	0	0	4	0	1	0	0	0	0
ENSG00000026950.12	1681.2	345.44	3241.56	3553.64	1561.3	1058.07	1443.32	782.47	858.12	387.18	943.85	423.89	2038.61	2601.57	1471.96	5666.95	470.81	4217.52	1909.39	852.99	962.54	3468.13	1184.19	864	1567.34	343.7	453.72	2480.02	1910.64	524.5	1368	1402.4	1046.17	1802.41	1770.33	166.28	711.63	2035.56	4347.78	3624.06	1468.41	1696.91	3546.52	2482.26	3154.91	742	1768.88	1169.35	3198.55
ENSG00000027001.7	1328	993	2407	2247	726	595	910	1413	2392	1995	1349	1693	1272	555	1289	1488	1227	1998	1453	885	1633	3194	659	759	1171	1115	520	5497	1120	586	1988	672	1091	1218	2509	1241	1840	2023	5641	3966	516	1704	2638	816	5039	363	831	378	1647
ENSG00000027075.9	14421	17082	33	2169.52	24691.57	211	1432.58	113	419.24	3231	463.51	2649.83	30488.66	35264	93	598	449	814.17	260	10446.06	23898	273	300	8704.88	310.73	2593	14442.35	337.34	194	1064	629.89	11501	57.09	57	511.46	4292.91	339.65	13655	258.45	430.43	31143.76	32216.04	40	43124	46.9	733.29	42	818.64	914
ENSG00000027644.4	0	0	0	0	0	0	0	0	0	0	0	0	0	0	6	0	0	5	9	0	0	7	3	0	3	0	0	0	0	0	0	0	0	5	0	0	0	0	0	0	0	0	11	0	0	0	3	0	1
ENSG00000027697.8	4534	3680	2712	1871	7421	3930	3872	3526	2881	2464	2945	7650	11211	7468	1750	6965	1786	3648	1818	2724	6495	4269	5230	3200	4083	5631	2607	3469	4684	7917	4141	4720	3057	2317	3260	6726	2176	5140	7952	5192	6370	8323	3755	8737	3078	3587	2536	3035	5953
ENSG00000027847.9	2251	1446	1387	789	1426	958	1610	1171	3130	1420	2040	2641	2083	1802	3322	3346	1561	3050	252	1538	2701	2668	1471	1597	1030	2089	1527	3168	3831	1882	2432	910	1076	1145	3165	2056	1922.97	2502	1430	1981	1788	2380	2575	2104	2142	1902	1155	2643	1261
ENSG00000027869.7	20	0	1	0	0	5	10	12	0	40	65	37	1	0	62	5	35	45	0	5	4	0	39	8	7	44	5	0	9	0	44	2	1	0	48	34	61	3	1	0	0	3	4	0	0	5	7	4	2
ENSG00000028116.12	2635	2768	1582	1145	2467	317	2151	565	2180	1743	1136	7400	2652	2321	539	1544	1361	2007	502	1192	3118	1305	377	970	2241	4089	1700	1489	1404	654	1810	1913	1611	1908	1099	7446	1830	5782	1135	2602	1430	3446	1431	3818	2269	465	1039	586	2801
ENSG00000028137.12	3418	3773	2863	582	8524	970	859	3866	945	0	30	0	5174	3307	103	1859	8	1678	521	1086	3396	5364	1210	2511	3139	14	2778	1942	130	1682	30	2161	1801	1067	1251	5	34	1445	3519	2578	641	3919	1180	11211	1903	3383	2452	1079	2942
ENSG00000028203.13	4042	6774	6044	2292	5794	1391	4927	2241	5112	3643	5504	7464	13650	8845	4807	7352	8215	6627	1422	3689	8736	6087	1687	3212	4499	4868	4769	5195	11046	2360	7020	3308	3194	6685	4903	5658	5891	5698	5050	8839	7142	12668	7193	11803	6293	2520	4438	3436	6519
ENSG00000028277.16	254	196	268	0	75	0	18	29	27	106	244	93	19	257	63	131	90	41	6	794	70	9	0	1176	32	47	83	33	22	45	294	32	46	301	747	23	213	202	15	0	27	107	121	81	177	0	311	0	113
ENSG00000028310.13	3544	2716	2224	1373	3610	1098	2971.07	1329	3361	2045	3346	1835	4149	4583	3094	2950	3517	5055	4077	2422	5619	2997	1502	2254	1651	2511	2136	2379	4001	834	3909	2119	2037	2221	3025	2363	3328	2677	2596	4127	2769	3992	4099	4733	5686	1512	1447	1882	2065
ENSG00000028528.10	4080	3216	3603	2312	5023	4765	5570	3606	3411	1880	2769	2832	9239	6850	3621	5088	1959	6217	3371	3402	6620	6106	5856	3579	5360	2752	2644	3810	5680	2552	3740	2644	3368	5902	2892	3076	2003	2842	6799	8210	5709	8003	7906	7664	5754	2724	3653	3330	6545
ENSG00000028839.5	1095	896	882	339	764	443	874	750	1513	428	470	1030	2870	1808	655	1374	719	1715	560	577	1393	906	613	498	1304	735	502	918	1307	963	813	757	737	700	1155	784	1199	1314.84	1270	1244	2910	2804	1049	1680	1008	837	517	1192	2171
ENSG00000029153.10	5059	3689	2453	110	4110	63	6184	155	4500	4594	3857	24767	6396	6012	1745	4530	5013	13222	122	3376	8701	3785	56	2735	8912	14103	2796	3636	5449	421	4499	3898	2204	1759	2688	13666	6056	8366	3262	10652	3816	9055	11332	8180	19041	333	882	132	9669
ENSG00000029363.11	13396	18628	20202	11447	14180	5825	16292	9783	18597	7580	11899	7962	28885	18622	6247	12182	11455	25017	12847	7893	25086	9269	8039	7278	19776	7206	11580	13478	18014	6553	16112	11064	11813	15814	13957	9699	13927	13504.01	12716	24022	14448	25592	18004	28039	26889	7018	10859	7698	23614
ENSG00000029364.7	7485.99	11534	15583	11023	9120	4560	14715	7609	14597	7069	8624	17061	21485	13452	9534	22305	5727	21869	4027	5436	15320	12431	6235	5027	11547	15188	9333	9977	18181	9165	10908	6211	6951	10108	11274	12922	7103	8398	10413	15361	15712	20894	13305	16105	14630	8797	11170	9263	14518
ENSG00000029534.15	111	72	84	6	37	340	1539	8	598	51	261	24	66	35	249	690	558	297	126	285	175	274	416	275	213	18	77	18	846	213	243	139	726	112	48	9	367	89	12	259	5	83	9	161	15	32	99	50	773
ENSG00000029559.5	0	0	0	0	0	0	0	0	0	0	0	0	0	0	0	34	0	12	0	0	0	0	0	0	2	0	0	0	56	0	0	0	0	0	0	0	0	0	0	6	0	0	0	0	0	0	0	0	6
ENSG00000029639.6	1221	431	866	265	588	151	378	333	1169	602	596	621	657	612	575	1380	819	919	327	610	590	437	299	291	344	367	335	936	748	267	782	528	496	477	1526	437	1077	1107	533	1006	413	741	1176	704	1221	504	205	410	473
ENSG00000029725.12	5439	4311	6079	3865	5193	2501	7182	3182	5771	2940	3359	6547	12347	7709	3716	7780	3118	9747	4330	4190	8832	7890	3407	3316	6142	4774	3452	4179	7543	3479	5014	4121	4108	6290	4731	4772	3176	5681	8259	8981	7038	8633	11701	11310	10325	3036	4011	4837	8115
ENSG00000029993.10	2790	2423	1505	885	3960	206	1891	880	1357	9399	2875	3141	7559	3112	2155	443	4176	3251	461	1297	6849	770	175	1230	1018	8802	1292	2297	2461	423	4607	2971	1105	1262	2606	5553	5121	2480	713	2672	3815	8293	3495	5128	5502	381	521	635	1513
ENSG00000030066.9	2944	2823	4039	2361	3962	2152	3935	2153	5838	2108	3266	6593	7764	5935	3658	4922	2454	8245	2026	1766	5938	3887	2627	1716	3806	5008	1591	3151	6800	2403	4093	2970	4076	3152	3493	3577	3753	3468	5315	8152	3154	7357	5748	8373	7910	1636	1807	1726	4818
ENSG00000030110.8	2342.73	1634.01	1835.51	1184.27	1589.66	338.39	746.6	920.03	1716	1651.91	1225.19	2597.35	2477.63	1656.98	1723.97	943.86	1314.81	1415	195	1263.64	2767.8	753.44	402.22	1385.48	677.88	1791.97	1255.01	935.88	2016.87	552	1734.25	917.9	606.33	622.89	1287.84	3501.77	1242.45	895.43	791.77	813.52	1066.49	3297.43	982.37	2058.84	1445.28	470	685.19	1110.13	746.6
ENSG00000030304.8	0	0	3	0	0	4	11	26	640	0	0	0	0	0	0	34	0	22	0	0	3	123	3	0	36	4	0	6	1	4	0	0	0	0	3	0	0	0	12	212	0	0	22	0	12	32	5	2	115
ENSG00000030419.12	135	274	1946	536	136	1020	702	301	4596	2225	443	935	293	1565	738	1613	207	1759	516	157	34	1250	1412	367	952	1304	226	2579	1539	1665	843	70	686	804	983	3029	428	734	1467	2246	262	213	908	353	1112	1478	1117	872	1649
ENSG00000030582.12	26961.09	10929	4597	11757	17181	16439	6836	22058	8981	22171	27343	19932	27068	30203	60156	12243	22508	4624	9922	45203	12274	33955	20807	38369	5258	7282	12066	9628	9324	19031	27943	3126	7241	15907	20745	15374	8839	19672	13755	12125	18918	19113	11587	35479	4957	19427	7049	33757	5557
ENSG00000031003.6	869	2559	3855	4440	1658	1345	2544	908	2281	251	1646	1621	5814	3300	890	2411	516	2527	2683	1055	2964	2213	1892	1146	4707	1537	1924	411	1812	941	2168	967	1401	4736	571	1234	599	871	3212	3799	3852	3102	3314	4110	3123	755	2865	1643	6718
ENSG00000031081.6	13791	18216	4493	5933	11431	1583	2247	807	2658	388	4934	58	17482	15388	5722	3014	1835	4911	2144	14123.97	12805	2122	2319	15333	6339	62	13274	2666	2562	2697	6874	4412	509	3729	6255	78	1317	13477	1287	1679	9522	14702	1965	26432	2260	1911	5647	4017	9389
ENSG00000031544.10	0	10	53	0	0	0	11	0	7	0	1	13	22	30	6	2	0	31	12	4	13	0	0	18	1	21	2	8	6	0	0	3	11	7	0	0	1	100	57	27	12	12	24	5	20	0	6	7	2
ENSG00000031691.6	578	328	382	274	518	84	473	272	663	571	485	223	303	291	72	452	764	946	81	244	543	188	130	108	155	128	145	426	198	113	194	194	598	236	619	99	777	220	300	454	141	368	598	590	2054	265	117	238	467
ENSG00000031698.8	12490	7899	11579	4859	11821	5979	10729	8146	14377	11524	17605	31328	16781	11022	12645	17958	8652	21302	16594	6971	17720	15422	6893	5326	12312	30887	6280	21714	25893	8366	25683	10508	7372	7248	20416	27363	10125	15184	28873	16711	13637	16638	31441	14209	26284	10503	11380	13718.22	15993
ENSG00000031823.10	4221	2036	2104	2354	1688	1806	1688	2116	2680	2663	2804	1584	2507	1898	3945	1462	3522	2350	743	1909	2380	2935	2872	2463	1884	1145	1785	2558	1985	2078	3226	821	1734	2323	2906	1281	4381	3376	1886	2622	1837	2519	1789	2912	2235	1859	1966	3121	2110
ENSG00000032219.14	884	1326	1080	1046	1729	685	1106	914	676	466	792	746	3719	2851	579	1012	708	1306	2944	937	2054	992	1071	1035	1518	541	891	417	1260	538	1005	746	703	2331	504	889	482	766	1556	2186	1712	2131	1480	2855	1291	337	748	588	2137
ENSG00000032389.8	3598	1764	1447	1077	2386	540	1671	622	2310	1994	2714	1808	2394	2669	1850	1766	2546	3464	368	2182	3819	1537	774	1357.48	779	2352	1169	3271	2732	1556	3554	1557	1615	892	2573	2407	3494	3364	997	2281	1999	3445	2273	4187	3210	1422	869	1499	1054
ENSG00000032444.11	13838	11355.71	8202.81	5723.07	12617	3975	5859.61	6694.62	7484	8285	13625	5802.39	10520	17847.75	23288.44	7570	10891	11102	2677	14928	13492.44	15806	4140	12125	4006.7	4343	9918.55	14115	8349	5684	15334	4955	5320.68	7197	12689	3941	10204.93	15867.81	7241	10682	10649.82	13896.43	12956	29227.36	8336	6055	6984.97	7029	6155.23
ENSG00000032742.13	536	638	897	938	700	461	1293	606	1077	307	613	521	1322	892	484	1190	1261	1605	893	577	1217	931	621	415	1074	322	259	981	952	573	1169	498	942	1105	954	503	774	678	1782	1676	604	1205	1748	1060	2167	386	637	578	1695
ENSG00000033011.7	3869	1585	2261	2264	1948	1848	2362	2124	2731	1557	1991	1391	2899.01	2137	2628	2772	1621	4842	1058	1389	3699	2006	2409	1156	2249	1432	1071	3469	2915	2119	2438	1588	1638	1767	3166	1062	2219	3203	1911	3381	2802	3614	3013	2549	3529	2017	1383	2479	2088
ENSG00000033030.9	1605	1294	1498	840	1222	470	1005	889	1697	978	1881	2409	2289	1806	1435	1307	2520	1590	537	616	1457	1101	627	1133	1314	1239	920	1486	1455	743	2678	746	799	1221	1061	1498	2296	1640	2154	1688	1629	1872	1951	1709	2072	774	685	1301	1785
ENSG00000033050.3	9981	8241	7277	5420	8253	3385	8600	4193	12437	5156	7816	12105	9656	10142	5830	9061	4917	15130	2803	5497	14524	7665	4181	4399	5396	10904	5620	8078	10041	4626	9819	5359	7705	4557	8153	8767	9744	10744	6789	9095	6116	11586	7815	11915	11842	4902	4305	4515	6449
ENSG00000033100.10	9708	8801	10440	4245	4795	7718	10450	8186	11575	4618	8366	3722	5721	8356	12219	14319	4921	12324	2217	11427	9049	15728	9463	10420	7875	3216	7756	9206	13027	10752	8357	3777	6162	9043	11387	2913	5547	9427	4944	10659	5080	7645	12589	10233	9266	10241	8424	12658.02	9863
ENSG00000033122.14	16	58	40	0	3	2	0	0	23	0	0	3	13	22	2	12	0	8	0	1	3	2	1	12	1	0	43	4	2	0	4	5	5	8	27	0	0	2	0	3	10	44	1	56	0	0	7	1	7
ENSG00000033170.12	1472	1713	8195	1813	1651	4557	5804	2310	6123	884	2890	2517	1752	1164	3562	12530	5490	17019	4720	1853	8211	9835	6514	1030	5581	1321	1248	6018	14422	2854	3352	2245	3917	8264	3386	2273	4123	2922	9981	15373	796	1652	12127	1531	12386	2853	7773	5481	6706
ENSG00000033178.8	8232	11730	14894	6583	11343	1499	10525	1655	13397	6883	9161	19682	20659	15588	4416	21118	12148	27573	2959	6222	17984	10072	2119	6018	8783	13142	6594	7605	14456	3512	12751	9548	5748	8470	8387	12261	9380	8805	13177	17777	13394	21384	21335	21392	28602	4097	7704	3406	12598
ENSG00000033327.8	3199	5213	1316	3040	3258	755	2646	656	806	175	2650	1399	7178	4550	1487	3429	2593	2110	800	2213	5497	3037	893	2364	3142	956	4989	1052	6303	805	2851	1545	1361	3088	1396	1602	2165	3701	3013	1749	5759	4895	2311	5955	1567	1234	2373	3149	3240
ENSG00000033627.10	2701	2165	3796	10900	1577	982	3507	2386	3364	4023	3603	1857	1917	3115	5638	7416	2971	3707	2275	3356	2069	4644	1744	2433	4604	1459	1482	2298	2882	1461	5262	1659	3345	4580	3314	2763	2113	2745	2419	4540	1343	1901	4271	3662	3998	1816	3212	1849	5704
ENSG00000033800.9	1320	1672	2023	1484	636	860	793	1248	1393	951	1215	689	1594	1261	1444	832	1558	904	1013	1076	870	1124	1234	994	2308	357	1291	1123	718	1051	1261	296	1310	2161	1239	669	1163	1716	926	1262	1166	1306	719	1452	777	1126	1415	2558	3082
ENSG00000033867.12	3508	16988	12026	6873	7532	3906	30542	2212	22176	11132	4645	26875	14525	13088	4183	51532	12340	51973	10649	7662	21727	40234	5749	8225	18741	14840	7430	2229	26290	6821	6328	7559	10397	14857	6396	14914	7205	4440	30226	54466	8956	12933	27086	10778	14014	6948	10434	3084	32222
ENSG00000034053.10	3723	1562	423	2778	510	427	1291	2788	758	1729	5260	620	8181	3915	4390	1790	3745	1876	248	4687	8059	1356	678	3965	154	613	1593	528	3554	956	6206	2198	282	546	4164	505	3906	2177	2520	291	3978	5549	1200	3273	352	1376	563	1301	285
ENSG00000034063.9	7465.32	2955.92	3705.66	640.85	7677.24	393.07	7769.09	1918.96	5242.56	4852.02	2128.46	607.35	1273.09	7327.41	2789.07	993.97	11161.26	28794.46	139.91	1087.01	11611.61	1370.96	337.97	1729.06	1311.13	564.29	1490.15	4207.71	4812.38	1020.16	2526.74	5074.22	2838.4	1168.81	7942.52	277.56	23699.17	7762.23	673.01	6183.96	1176.19	7266.7	4655.69	8462.68	17628.26	981.68	1002.97	751.53	2177.92
ENSG00000034152.14	2704	1010	1585	1077	968	961	1088	1098	2429	1613	2361	473	1398	1721	2467	2216	1332	2923	627	2188	1048	2459	1170	2303.01	2607	331	831	794	807	1236	2252	360	1192	2117	1173	493	1433	2380	716	2645	865	1916	1388	3138	2460	681	1154	985	1896
ENSG00000034239.6	0	0	12	27	2	3	2	26	14	52	59	8	0	3	19	0	0	5	6	0	0	13	0	0	29	21	0	32	2	0	13	0	24	38	18	15	3	0	17	29	0	0	71	0	62	0	29	0	47
ENSG00000034510.4	112382.1	27678	27460	18137	214916	39200	147874	51122	69358	120847	29940	45706	152844	101019	48214	76550	130609	85332	19123	55983.28	171604	76006	51984	44454	15288	72954	31677	71290	236127	44736	45416	38485	59561	39669	92910	117586	81804.95	57063	113896	120004	99991	182917	104827	75870	66636	63783	14980	68041.26	12082
ENSG00000034533.7	465	356	512	365	342	130	430	182	606	212	443	597	886	517	401	482	228	727	169	142	571	661	197	191	573	371	180	231	726	328	406	220	405	529	401	435	458	280	787	647	501	686	491	561	641	224	327	418	755
ENSG00000034677.7	4855	9815	5904	5689	14819	1491	5398	1524	2661	2766	3750	7552	19990	23489	4281	5489	7588	6303	6157	5926	22692	3332	1980	7560	5543	7090	5376	2778	7080	2154	5783	6225	2108	4088	2831	6198	4113	5194	7543	6115	17156	16060	7090	16535	7375	2751	3156	2516	7266
ENSG00000034693.10	1097	643	1125	771	711	457	896	722	1755	749	489	1195	1284	934	526	1185	533	1585	466	487	1367.93	949	777	348	1162	674	410	1060	975	492	767	475	873	1064	682	955	804	1435	1038	1579	842.8	1235	966	1331	1338	458	707	744	1559
ENSG00000034713.3	1481	887	937	708	1446	1125	1139	1389	1074	1924	1660	830	3994	2580	1111	1325	2322	1353	1449	1171	1576	896	1703	2034	1003	798	665	1520	1417	1204	2035	747	517	807	1713	973	1607	1487	949	1777	2929	2913	1423	3123	1261	1187	617	2017	1391
ENSG00000034971.10	0	0	0	0	0	2	4	0	0	0	0	1	0	0	0	25	0	0	130	0	0	78	5	8	259	0	0	0	19	0	0	0	0	3	14	1	0	0	164	108	0	0	20	0	8	0	0	58	196
ENSG00000035115.17	359	920	1411	971	541	842	2238	878	1828	2207	1522	4396	1482	1605	1067	2632	1118	1194	1398	648	1468	2749	1408	614	2540	4802	849	512	2394	900	2222	466	1165	2750	739	4614	688	673	1517	2312	853	883	2190	1052	1470	886	1153	1075	2458
ENSG00000035141.3	3631	1728	1553	1036	1313	697	1289	1427	2539	1529	3225	1578	2112	1231	1364	1277	3332	3100	1076	1598	3392	1033	1002	1038	1147	1296	1088	2432	2284	1061	4041	1176	1175	1152	1753	1304	5184	4902	1100	1648	823	3787	1167	2793	2245	1441	662	1117	1421
ENSG00000035403.12	41135.99	35619	96055	10745	25522	21669	43780	18768	38471	15395	27658	18596	23103	38521	41299	48205	36155	55562	11012	40585	51086	56936	26610	31125	30155	8388	27111	27213	54603	32292	34738	20170	27035	48764	46974	12131	37967	46158	33972	59537	12304	34542	48080	40561	51560	42409	81967	67983	39475
ENSG00000035499.8	1567	491	528	489	1143	53	378	471	568	1272	693	241	363	504	237	90	1894	1387	31	66	1613	94	8	154	205	172	228	959	318	156	842	741	278	131	961	189	3069	1673	124	616	157	1652	318	1776	1749	97	69	206	373
ENSG00000035664.7	199	525	487	43	930	155	167	0	142	17	47	113	475	1900	19	240	84	50	44	176	397	105	174	615	1008	42	337	42	35	82	13	84	189	1874	82	293	14	37	611	162	1070	788	352	450	239	22	656	65	887
ENSG00000035681.3	4269	2837	3951	1965	2437	1069	3271	1148	4461	1408	3147	7314	3298	2894	3211	3950	1753	5145	1914	1570	4225	5992	1609	1347	4283	3850	1761	3914	2930	1882	4165	1529	4146	5990	3059	3998	3307	5168	8152	6260	1961	4207	7932	4835	6745	1525	3324	2493	4511
ENSG00000035687.9	5767	6816	5318	2459	7381	1337	3893	1383	5296	3509	3327	6001	12739	10134	2907	6239	4303	7221	2646	3131	10415	3589	1819	2194	3847	3804	4477	5137	5131	2391	4270	6237	3311	2614	3993	2991	3900	5794	5378	4366	8020	11995	5322	14006	6088	2593	1764	2650	5704
ENSG00000035720.3	0	0	0	0	0	0	0	0	0	0	0	0	0	0	0	0	2	0	0	0	1	0	0	0	0	6	2	0	0	3	0	0	0	0	0	0	0	0	0	0	0	0	0	1	0	0	0	0	0
ENSG00000035862.8	18130	9403	19439	18277	5820.96	31773	9313.95	24999	10595	725	14881	371	12366.99	16573.79	53634	7299.99	8095	7587	7557	26212.05	5919	23829.99	43167	24123	18995	239	10196	27326	9458.98	18571	17050	1827	13027	34655	29799	261	9691	12437	12244.98	24396	10605.96	8489.97	20508.98	13960	11128.99	19198	21249	41724.87	18541
ENSG00000035928.10	5308	4423	5449	3642	4424	2165	4687	3705	4659	3874	4108	6620	9447	7179	3840	6427	5820	6944	2628	2739	6680	3627	2992	2594	4908	4313	2768	4645	5966	2222	7142	3309	3250	4926	4156	7939	5024	4781	5152	6766	7112	8740	6976	10077	8773	2237	2494	2911	6568
ENSG00000036054.8	3508	3577	9483	3247	5026	1652	7852	2229	8575	2229	2451	6107	8501	6033	1988	14359	2788	11091	3545	1785	6558	9992	3128	1857	7038	4539	2465	8384	9550	3872	3402	3154	6062	6576	4917	5817	3023	3638	11684	16400	4354	8405	18092	7438	21348	3144	4519	3591	10479
ENSG00000036257.8	3918	4577	5660	2678	4539	1944	4441	2693	4449	3015	3434	7951	7385	9059	2434	3942	3317	5582	2458	3314	7732	4038	2771	3184	4948	4656	2733	3408	4980	2370	4435	2831	2750	4068	3892	6593	3491	4695	5534	7387	3838	6168	6591	10548	6945	1990	2380	2556	5368
ENSG00000036448.5	30	8	10	37	9	0	110	78	114	30	163	45	45	69	227	79	14	93	52	46	4	47	8	4	17	36	21	47	52	40	202	20	34	21	7	10	222	0	140	42	38	55	52	24	36	86	32	52	49
ENSG00000036473.6	2	0	0	0	0	0	0	0	0	0	0	0	13	39	0	0	0	1	0	0	1	0	0	0	0	0	0	0	1	0	0	3	0	0	0	0	0	0	0	6	62	26	0	272	0	0	0	0	0
ENSG00000036530.4	44	30	17	16	23	10	24	0	40	0	0	0	32	16	10	57	6	32	18	85	14	57	39	20	124	2	2	0	8	5	2	3	22	259	0	5	0	0	6	72	15	5	43	18	23	85	54	99	224
ENSG00000036549.8	5072	6023	9466	5633	5373	2226	5109	4004	6576	2614	5399	9496	13786	13059	4284	11551	3836	10514	5378	2690	9891	7983	3511	2434	6620	8759	3964	3941	7836	2397	7857	6487	5487	7579	4923	7498	4702	5077	11068	11685	9606	11494	12088	13115	11909	2860	6086	4084	9195
ENSG00000036565.10	0	0	0	0	0	0	0	0	0	0	0	0	0	0	0	0	0	0	0	0	0	0	0	0	0	0	0	0	0	0	0	0	0	0	0	0	0	0	0	0	0	0	0	0	0	0	0	0	0
ENSG00000036672.11	0	27	30	93	0	1	5	25	152	251	80	85	17	6	858	12	76	7	0	0	6	41	11	32	68	32	0	97	4	0	203	10	19	58	37	54	108	0	56	40	5	21	54	27	11	0	11	37	166
ENSG00000036828.9	0	0	0	0	0	0	0	0	0	0	5	0	0	0	433	3	5	2	0	0	0	0	0	0	0	0	4	0	0	0	4	0	0	0	0	0	0	0	0	0	0	0	0	0	0	0	0	0	0
ENSG00000037042.8	147.93	227.04	458.78	555.47	144.25	288	292.11	970.35	724.99	403.3	637.29	168.01	312.35	353.27	1279.34	574.29	686.44	258.08	82	828.77	239.15	550.36	329.06	557.33	512.27	223.41	276.45	697.11	369.76	396.75	616.83	111.15	498.73	784.79	342	323.72	408.89	297.59	345.37	625.84	293.02	295.25	554.13	385.92	358.2	428.21	515.86	998.38	639.47
ENSG00000037241.3	1176	520	851	555	770	197	1227.33	501	1575	1285	963.96	1210	1014	781.98	773	672	1292.91	1840.99	412.91	632	1942.39	572.98	496	470.99	594	770	397.79	979	1917.97	471	1349	478.98	757.13	705.89	854	1021.99	1448.99	926	1051.91	1244.15	659.97	1251	1000.72	656.99	1427.92	471	291	728	767.21
ENSG00000037280.11	10141	11752	15	2	18843	231	16	86	0	0	118	3	167094	67835	54	122	130	135	0	13016	1480	12	392	21219	3	11	12745	28	2	243	222	1456	8	4	267	0	49	5199	23	20	71755	96070	18	102105	19	12	0	19	2
ENSG00000037474.10	7100	4167	3800	2977	5704	1570	4784	1527	6042	6002	4485	6975	8564	8437	2696	4207	6334	10297	1117	3468	9828	4300	2101	3620	2471	6236	3233	4046	6348	3006	6775	3420	2903	2581	3164	7311	7111	9539	3712	4444	5281	9336	5348	8905	6958	3451	2701	2943	3337
ENSG00000037637.6	2152	2145	2490	2228	1366	1011	1955	2132	2452	1601	2229	3418	2415	2246	2713	2099	1329	2154	1763	1472	2153	2217	1488	1741	3037	2204	1751	1324	2253	1477	2663	1021	1314	2382	2466	3362	1440	2423	1910	2261	1576	2504	2374	2570	2265	1434	2170	2735	3677
ENSG00000037749.7	4664	6380	7131	3669	10901	2190	5114	4137	4809	2208	3674	7607	20023	9709	4972	6256	1814	6957	998	3837	9774	3547	2684	4130.77	6074	4449	4397	2973	6632	3859	4522	6370	2891	3346	3967	5784	3035	5864	5578	4168	11472	17092	4186	13281	3673	3846	3875	5115	7787
ENSG00000037757.9	2643	1862	1384	1358	2061	722	1500	2057	2862	3015	1485	1193	2101	2187	4021	1677	2737	2347	966	1176	1646	1955	1082	2259	1026	1373	1333	2954	1430	1454	2129	1491	1404	1580	1480	879	3057	2476	1311	3164	1758	3311	1772	3343	2921	1539	744	1596	1198
ENSG00000037897.12	665	204	198	147	141	227	193	93	370	728	628	246	193	193	649	195	968	706	125	435	329	215	417	213	228	172	156	315	290	329	683	117	228	131	612	73	1591	717	226	149	155	211	199	178	329	344	208	294	246
ENSG00000037965.4	0	3	56	0	0	0	0	13	287	0	21	0	0	3	222	0	99	19	183	9	0	21	0	47	298	0	2	6	2	0	73	0	356	11	64	0	103	52	3	3	0	0	0	1	0	0	2	251	262
ENSG00000038002.4	975	665	809	1651	1019	247	1346	672	319	870	402	1566	2003	1435	1212	1266	1177	540	620	828	1300	1459	351	403	1776	2061	594	3153	2017	945	734	522	271	1329	1995	4116	1080	909	951	2718	1213	1769	3341	1279	2844	1097	798	361	1761
ENSG00000038210.9	3536	2961	2805	1718	3712	1207	2936	1492	3838	2029	1026	2130	4546	2703	1219	3947	3612	7804	1365	1406	4135	3833	1581	1398	3603	1806	1414	2111	3021	2368	1489	2132	2766	2985	2643	2025	3035	3847	1730	7474	3972	6380	4007	6156	7840	1312	2133	1799	3608
ENSG00000038219.8	4798	5964	5001	4300	5260	3985	9062	4411	5899	2983	6254	7726	15014	11327	3256	8306	5586	9862	6246	5273	12200	6670	5547	5680	8085	4982	4123	3139	8644	2218	9112	2960	4356	7147	3704	7102	3542	2396	7693	9302	7221	9183	11250	12463	13648	2972	4006	3297	9592
ENSG00000038274.12	9213	5401	4577	2168	8656	1720	4292	4325	3436	2349	3330	4625	14900	7408	2908	5049	3491	9221	1173	4491	12532	6154	2185	2537	3854	5010	3611	5090	4845	2356	4688	5500	2216	3062	6015	3060	4580	12655	13407	11125	7592	13682	5358	9063	7749	2448	2432	2485	5185
ENSG00000038295.3	657	1924	2923	0	1847	34	5	7	95	260	544	261	13688	2729	1907	173	557	80	134	517	2588	10	45	418	1115	89	1398	6	3	23	948	648	4	39	61	28	382	1741	38	13	9792	6719	19	9487	4	3	166	29	696
ENSG00000038358.10	8617.02	7418.5	7054.71	4967.02	7127.59	2462.6	4848.99	4713.43	8546.5	5885.47	6757.84	3788.54	7786.85	8143.91	9672.02	4105.67	8819.49	8514.55	1205	7298.98	9934.13	7259.34	2488.23	5895.23	3674.78	2671.4	5885.61	6486.01	6177.36	2401.66	7596.8	2888.92	4857.84	5624.65	7173.2	3544.89	8619.35	7313.81	4335.67	7365.27	4805.98	9770.42	5912.44	11367.9	8576.23	3181	4634.94	4878.16	4882.08
ENSG00000038382.13	32267	36340	59548	24487	28446	6202	17855	8929	93302	8444	33963	17168	37422	56548	31237	52802	24275	50665	8496	28173	44777	57568	7153	29345	27612	12364	27574	14472	44782	8363	39162	16214	35068	36717	27610	13547	21246.81	22062	34464	50629	24241	36667	47291	47453	47455	6691	44541	11792	34348
ENSG00000038427.11	839	1894	94251	397	1474	174634	425331	57320	35658	14280	34338	851	223	746	301930	227293	69023	104015	30050	16923	3321	74005	244791	9862	81915	6465	4546	7937	432533	182524	42557	1335	69073	59213	226751	1231	41401	833	53357	105956	167	126	150047	1255	42539	146879	87507	51074	134297
ENSG00000038532.10	2747	3061	3406	2262	1948	1542	1553	1902	2322	2028	3038	2000	2817	4811	5259	2187	2440	2867	1070	2653	2963	2871	2068	3463	2056	1247	2775	2120	2419	1058	3780	862	1814	2385	2599	1861	1904	1780	2015	3577	3015	2733	2373	4232	2390	1195	1963	2786	2488
ENSG00000038945.10	56	150	0	0	311	5	16	23	16	0	58	0	22	215	18	83	5	12	1	190	66	144	0	261	0	0	72	7	4	0	64	6	83	47	26	4	11	1	30	178	15	48	33	26	46	0	4	11	3
ENSG00000039068.14	0	0	4	6101	0	0	4	144	0	28875	12221	80575	0	2	3976	10	8781	22	43	0	0	0	0	1	1	32518	0	1	17	0	16135	0	1	4	2721	56950	4775	0	5	0	0	0	0	3	0	0	39	1	6
ENSG00000039123.11	5237	5688	7156	3918	5958	2055	7149	3237	9114	5097	3694	8656	11262	8464	2670	9594	6406	14648	3717	2995	12327	5752	3585	2275	5578	5648	3627	5238	7499	2910	5362	5721	5556	5200	6335	6631	6056	7796	9848	11441	5336	9876	10814	12807	15267	2957	3033	3916	7731
ENSG00000039139.9	189	316	659	0	39	13	107	595	501	145	876	89	72	493	543	521	859	216	9	934	54	1307	28	652	378	61	67	85	80	57	1121	62	371	274	744	31	184	102	389	1213	8	81	163	119	108	0	356	2	629
ENSG00000039319.12	3360	4760	7154	35010	5534	1705	4016	3399	4351	2117	4088	6069	18524	9837	3594	7099	3180	7589	2455	3331	7562	5060	2489	3179	7059	2824	3113	3355	4696	2714	5429	3854	2564	5903	3542	4348	3714	4314	8306	7188	8828	11011	9899	12815	9966	2391	3678	3593	8203
ENSG00000039523.13	7927	4353	1781	1570	4270	2104	1948	1820	3010	2008	6281	1057	4626	6650	6692	2012	5853	1986	941	7125	3747	3388	2706	8921	1469	650	3080	2839	1822	2054	7266	1468	1360	2303	3217	763	3476	5298	1551	3143	2886	4879	2335	10418	2635	2631	1857	3457	1801
ENSG00000039537.9	0	0	0	0	0	1131	1	81	30	0	0	0	0	1	0	0	2	4	165	3	0	0	2014	0	0	0	0	0	6	2104	0	0	6	0	1	0	0	0	11	0	0	0	6	0	3	2126	0	1151	0
ENSG00000039560.9	20506	29991	32906	4686	15065	2542	7637	5646	22200	5323	15141	5289	40262	46227	15676	25625	20820	24100	5159	24054	28865	16732	3634	21845	10133	6823	23469	17433	19797	7892	19893	6476	10135	5481	41562	3527	18428	16190	12059	14194	22427	35191	35422	37402	30126	10462	7197	17654	17531
ENSG00000039600.6	3	0	7	0	0	2	0	0	9	0	0	1	2	0	54	6	25	0	0	0	0	5	0	2	1	1	0	72	1	0	7	0	7	0	0	4	1	0	6	0	0	0	13	9	1	0	1	0	3
ENSG00000039650.5	2788	1338	1173	1452	1955	745	2192	1008	1982	2270	2717	1340	2014	1732	2589	1307	3406	2461	1112	1869	2307	1568	957	1789	843	1415	1364	3118	2523	896	2768	1076	1200	1241	2997	1074	2764	2167	820	2730	1295	2463	2765	2307	3465	1473	1224	1187	994
ENSG00000039987.2	0	0	0	3	0	0	1	71	0	0	0	2	0	1	26	0	0	0	0	0	0	0	0	0	2	0	0	0	1	0	0	0	2	2	0	0	0	0	0	11	0	0	5	0	0	0	0	3	0
ENSG00000040199.14	1638	1510	3610	1207	1377	527	1630	730	2918	509	1581	1376	2595	2718	2048	1684	1957	4735	1164	1100	2040	1793	907	1217	2660	623	934	1537	1522	712	1759	905	1551	2939	1556	1125	2554	1941.75	1887	2136	2160	2409	3347	3431	3570	919	3658	1315	3297
ENSG00000040275.12	1936	1577	2162	662	1202	981	1093	785	2783	1242	1082	785	714	1124	329	2275	4661	5027	2242	723	2449	897	1366	855	619	569	729	1132	1087	1005	1844	1132	1033	812	1986	559	5090	1765	474	1314	362	1417	1381	2213	2472	1086	581	997	1406
ENSG00000040341.13	3286	3601	2603	2388	3644	801	2917.81	3107	2157	1838	2858	1961.95	5561	5189	2924	3879	3815	3020	1158	2716	5919	2685.84	1075	2700	3200	1256	3006	1591	4421	1320	3656	2745	1516	3215	2856	1979.77	2979	2930	3172	4468	4685	5629	3846.97	6944	3367	1462	1364	1840.65	3871
ENSG00000040487.8	1433	740	792	1619	869	747	1111	732	1341	737	2321	1473	1027	1093	2394	848	1323	940	281	874	992	1742	549	631	738	1426	497	1311	1215	710	2838	461	1050	1063	1357	1372	1228.95	1790	1152	917	825	1234	1382	932	1397	1000	762	1229	843
ENSG00000040531.10	2221	959	855	1966	971	733	841	1399	867	583	2628	1435	1749	2079	2381	1664	530	651	227	1290	1356	1663	992	1314	933	1164	658	815	1254	672	3024	547	909	1057	830	805	1108	1825	1436	1431	2091	1941	1996	2357	1346	789	767	1292	762
ENSG00000040608.9	44	37	86	75	9	0	10	16	5	461	1136	322	89	87	1685	18	1208	39	0	118	49	18	4	62	6	169	21	162	24	40	1159	19	0	0	73	189	744	0	19	10	57	148	73	220	57	23	2	76	16
ENSG00000040633.8	1724	2307	2536	2429	2543	1423	2025	2138	3154	1515	1980	1863	4194	2603	2984	2270	1582	2982	865	1946	4450	2768	1527	1657	1538	1555	1762	1935	3559	2188	2561	1196	1567	2221	2754	2272	2360	2620	2817	2750	3096	3833	2549	2354	2485	2323	2171	3029	2295
ENSG00000040731.6	0	0	203	0	0	1	3	5	0	0	56	0	3	62	15	500	17	279	40	146	7	70	0	23	0	0	14	24	576	9	22	0	0	73	350	0	41	0	6	4	1	1	99	0	172	0	11	0	1
ENSG00000040933.11	3151	3725	3524	2969	4606	1739	3496	1793	2810	2107	3400	3345	12744	7336	3057	5114	2716	5037	892	3685	7362	4840	1742	3257	3126	2795	2995	2559	4917	1883	3888	2070	1998	3800	2710	3078	2455	4066	3544	3883	5060	9254	5442	8151	5285	1228	3794	2157.96	3883
ENSG00000041353.5	4	19	1376	89	4	200	851	9	2962	3773	220	9235	7	1	459	3287	578	1278	153	25	232	506	287	158	2071	18374	3	8461	428	347	460	57	1707	80	1358	16857	466	89	254	314	2	1	5507	13	5329	120	588	53	6554
ENSG00000041357.11	7774	5639	5829	3748	5907	1815	3635	2598	9183	6175	3859	4554	9537	4823	2954	5252	6323	10786	1520	4171	10009	3384	2234	3086	4735	4351	3426	6667	6196	2617	5483	5709	3744	3469	6235	4039	8025	6558	5559	8367	4424	10713	5993	8478	10738	1883	2068	3603	5316
ENSG00000041515.11	7	3	200	441	6	2	4	14	0	85	58	35	1	14	178	42	171	0	12	3	1	20	18	15	10	0	0	100	2	22	65	0	1	9	6	0	68	0	5	46	0	1	5	0	2	169	5	153	21
ENSG00000041802.6	4255.99	5014	3482	2683	5396	854	2782	1166	3985	2000	2628	4509	5438	5622	1069	3252	1985	5515	1377	2485	9378	2144	1654	1850	2333	3755	2706	1757	3579	1893	2955	3590	2532	2290	2887	2843	3123	5540	2658	2723	3901	5960	3449	6631	4594	1568	1904	2057	2907
ENSG00000041880.10	1553	531	1021	611	832	962	2582	386	2060	93	1313	205	386	831	1477	1264	1283	1608	435	457	707	1544	1145	309	2267	239	395	1641	1979	930	1558	250	1195	1890	673	190	987	1201	1061	1540	295	633	1291	1118	863	1153	1517	844	2412
ENSG00000041982.10	2139	497	74259	4817	564	195	10565	8093	23771	10847	54096	75892	8	8075	30147	8075	15403	16910	339	8674	197	17361	306	4194.98	246908	26901	105	5314	805	330	63982	362	12126	92849	72472	49333	12970	98	122982	78391	4	2153	145536	443	95910	40	121953	309	286616
ENSG00000041988.11	741	317	597	489	947	484	659	835	691	578	600	1160	1099	710	1479	1025	646	1161	244	573	926	1078	757	378	433	906	331	751	988	424	1193	463	630	906	1094	969	947	1078	1437	1073	925	1199	1317	915	1112	659	371	739	555
ENSG00000042062.7	0	2	2818	0	11	218	9	1403	459	5	27	2	0	59	55	1723	130	885	113	0	3	2978	199	37	67	38	2	48	226	420	7	17	1839	2506	446	5	44	0	782	1540	20	0	1827	2	2177	185	2281	662	93
ENSG00000042088.9	2342	1329	1438	887	2040	311	1296	589	1784	1693	1280	1333	1934	1229	1574	1480	2577	2517	256	948	3609	942	651	727	696	881	894	1929	1472	646	1694	1416	1214	1109	2089	1169	4284	2678	865	2118	654	2127	1358	2188	3034	662	559	447	895
ENSG00000042286.10	752	208	638	815	334	668	958	624	451	113	1188	2541	97	175	929	841	403	1069	144	218	578	974	623	158	767	1585	131	835	690	883	1351	395	581	828	984	2950	1241	1030	1165	1071	57	335	721	391	834	1078	644	1025	867
ENSG00000042304.6	0	0	0	0	0	0	0	0	0	0	0	0	0	0	0	5	0	2	0	0	0	0	0	0	0	0	0	0	0	1	0	0	0	0	0	0	0	0	0	0	0	0	0	0	0	0	0	0	0
ENSG00000042317.12	349	448	624	449	393	430	685	744	676	187	669	329	1008	506	735	1002	321	428	354	385	784	1152	614	455	1006	434	405	510	798	348	678	251	730	1197	581	435	194	293	1168	1092	409	635	1110	542	777	135	513	476	1473
ENSG00000042429.6	2111	2531	2919	1947	2002	911	1778	1841	2952	1849	3449	2194	5127	2775	2921	2212	2406	3723.68	979	1711	3740	1737	1425	1786	2366	2165	2022	1644	2363	1007	4988	1569	1607	2304	1989	1686	3039	2557	2310	2775	2881.47	3368	2737	3238	3249	1524	1624	1712	2978
ENSG00000042445.9	6187	3516	3773	8057	6060	2430	4788	2430	4452	4014	2205	7532	9493	7446	4244	7271	2098	6458	588	2954	6316	7485	2372	2507	3259	6839	3577	5398	6899	3474	2911	2493	3087	4938	3958	9072	2173	4719	5602	5500	6830	9293	6891	8077	5487	3187	2948	3072	5686
ENSG00000042493.11	4501	919	1360	378	3220	890	647	1777	2383	13326	6077	13585	1571	776	16071	775	11977.74	1000	1577	4262	1135	13100	1238	1019	7561	21682	612	6024	3049	554	8391	660	3448	8243	6415	22060	9655	2277	2648	12208	642	2972	6381	1611	5492	794	4924	1999	9307
ENSG00000042753.7	7177	3050	2324	2556	5229	2895	4703	3516	4352	7633	3995	3010	6936	2831	6262	4086	4417	5531	1291	5067	9901	4080	3307	3044	2958	2632	2795	7312	7031	5967	3915	1857	3002	2406	8320	5141	6956	6428	3196	4606	3548	8445	3239	6611	3762	5673	1348	6666	3295
ENSG00000042781.8	0	1	3	6047	0	7	4	0	0	0	0	0	2	0	0	2	0	0	0	0	0	2	0	0	25	2	0	0	5	0	0	0	2	46	0	8	2	0	3	19	1	0	3	0	2	0	12	0	22
ENSG00000042813.3	0	0	0	0	0	0	0	0	0	0	0	0	0	0	0	0	0	0	0	0	0	0	0	0	0	0	0	0	0	0	5	0	0	0	0	0	0	0	0	0	0	0	0	0	0	0	0	0	0
ENSG00000042832.7	38	33	227	91	23	81	231	38	84	3	401	65	14	128	290	293	30	187	28	488	78	287	154	207	110	54	56	33	88	141	484	6	103	76	101	64	13	14	140	10	30	29	119	24	16	77	123	152	256
ENSG00000042980.8	0	24	14	0	14	0	31	122	17	202	0	7	17	21	5	62	6	6	22	10	10	0	0	27	18	62	34	0	0	6	0	9	0	288	44	233	0	0	12	0	3	7	11	12	17	0	41	0	37
ENSG00000043039.5	0	0	0	0	0	0	0	0	0	1482	3	262	0	0	0	0	24	0	0	0	0	0	0	0	0	188	0	0	0	0	0	0	0	0	0	533	14	0	0	0	0	0	0	0	0	0	0	0	2
ENSG00000043093.9	2588	3544	5977	3437	3570	1510	5305	3051	5108	2747	2763	7644	9659	4652	2159	5966	2031	8040	3108	1478	5622	4741	2303	1522	6014	5412	2310	1993	5141	2211	4246	3750	3555	4471	3577	6812	2728	2386	6035	7157	4444	7987	7865	6487	7954	2420	3421	2476	7852
ENSG00000043143.16	3682	2559	4227	6960	2544	4096	3642	2495	5654	4057	1974	2409	2701	4223	5086	3054	2798	4779	1654	1515	3648	5449	5493	1914	2737	2171	2590	3295	1893	6755	2041	1762	3783	4565	3369	1700	2586	3262	3671	5366	2391	2765	2836	4798	2984	6639	2410	2459	3505
ENSG00000043355.6	0	2	0	0	0	0	0	19	0	0	0	0	24	0	0	0	0	0	0	0	0	0	0	0	0	0	3	24	0	0	0	0	0	0	0	0	3	0	0	5	22	18	0	31	2	0	4	0	0
ENSG00000043462.7	628	32	0	64	106	7	2	0	0	0	7	0	2	50	0	0	0	0	0	153	2	0	4	133	0	0	2	0	0	0	3	78	0	0	4	0	0	1130	3	0	17	27	8	1	0	0	0	0	0
ENSG00000043514.11	860	973	1036	557	1166	672	1007	881	1561	1374	803	2412	2356	859	860	2193	1103	1975	497	760	1678	967	886	650	1045	2455	709	997	1902	485	1632	1070	896	677	1001	2126	1212	471	1298	1706	852	2103	2278	1121	2364	549	557	479	1559
ENSG00000043591.4	233	221	0	0	41	5	1	0	0	21	15	846	461	5047	1	15	4	5	0	4	0	6	0	56	0	186	749	0	0	0	6	3	0	0	12	227	19	254	0	0	6987	1479	1	2263	1	0	0	0	0
ENSG00000044012.3	0	0	0	0	0	0	0	0	0	0	0	0	0	0	0	0	0	0	0	0	0	0	0	0	0	0	0	0	0	0	0	0	0	0	0	0	0	0	0	0	0	0	0	0	0	0	0	0	0
ENSG00000044090.4	2782	3797	8883	2747	5266	4535	5231	5602	7331	2781	5237	4877	5815	8045	12986	11618	4145.99	10480	2635	3887	5886	14183	5537	3712	5261	3802	5749	9045	12148	4397	5856	2772	5504	9721	7626	3321	2288	2997	6647	12247	4460	6617	17306	8931	12783	4470	10905	4589	8230
ENSG00000044115.16	61414	49770	38597	29073	65524	13286	60517	21795	31470	27540	42271	48980	108903	76875	42734	55361	39769	56898.98	11641	36826	80875	48535	17110	29585	33005	49444	36933	35422	63582	27189	53500	28901	21543	39425	41413	64175	48237	48927	43200	65437	60476	104053	55594	110820	60030	26903	25861	33499.01	43053
ENSG00000044446.7	698	983	837	824	1134	778	810	860	1147	1663	2154	1900	1562	1317	2946	1196	1956	1069	720	729	1428	1533	1133	651	1209	1977	808	1954	1638	822	2516	618	743	1446	922	1462	1638	2486	936	1836	850	1436	1599	1763	1727	916	998	1210	1285
ENSG00000044459.10	1178	1456	2039	1522	1655	758	1916	1339	1945	717	595	223	2431	2081	612	1904	959	2038	2424	561	2107	1918	1227	955	3200	132	819	583	1303	453	862	1105	1580	2116	1102	298	1260	851	3215	4778	1329	1813	2428	2472	3070	686	1576	1076	4046
ENSG00000044524.6	0	4	25	10	40	1169	584	72	775	0	7	0	8	5	612	2107	11	1725	99	35	1	255	1393	135	42	18	0	128	10	871	4	5	33	177	190	3	1	35	84	662	0	2	371	16	381	933	17	414	84
ENSG00000044574.7	44495	13613	15538	7411	21699	26698	24026	28637	43197	34425	45055	244086	39220	37527	23132	56925	30588	100460	8632	37919.02	41489	33132	37564	34606	17596	71790	11480	43918	42816	30937	61178	14648	8729	9918	81006	135043	33450	48442	31189	39260	23758	28861	167935	63332	64530	33870	12982	41379	20203
ENSG00000046604.8	433	23	445	508	997	4	9	2303	3471	13380	27745	24238	5351	1296	13767	108	13102	52	591	2497	3	72	8	1991	865	23133	2	3170	7	251	35206	38	663	21	7351	19861	13143	2	245	178	1598	1443	7053	2469	5388	362	15	2298	2575
ENSG00000046647.9	478	367	351	316	502	870	503	336	343	632	458	262	616	582	1255	808	905	543	148	1016	829	607	853	490	392	274	314	1246	569	354	820	334	448	635	505	468	677	837	417	734	355	729	722	494	713	674	585	494	1029
ENSG00000046651.10	615	769	1150	559	753	390	911	683	2939	1336	1610	1619	1255	898	1447	1463	1011	1185	1844	662	930	1213	390	608	1366	1344	515	818	1110	406	2092	393	916	2036	488	2724	971	269	1330	1657	827	1226	1873	1355	2473	371	1067	554	2525
ENSG00000046653.10	10	5	14	5168	8	1079	3667	229	7205	316	100	30	10	11	15	144	125	662	37	43	32	318	1838	3	307	6	6	45	27	3171	217	32	4419	1267	762	91	206	0	129	1175	0	5	266	8	629	1555	425	2537	1061
ENSG00000046774.9	0	0	0	0	0	0	0	0	0	0	0	0	0	0	0	14	0	0	0	0	0	0	0	0	0	0	0	0	23	0	0	0	0	0	0	0	0	0	0	9	0	0	0	0	0	0	0	0	0
ENSG00000046889.14	11290	19789	37	3	38428	595	118	32	9	0	866	0	27694	27274	2171	98	631	82	483	4813	30237	5	707	10137	59	0	15008	1	8	504	1087	27196	6	3941	26	1	89	9568	67	122	17469	21150	299	46984	77	182	5614	38	512
ENSG00000047056.10	2293	2596	2703	1872	2480	1120	2122	1167	2067	1076	1935	1950	3402	3371	2415	1478	1470	2741	1071	1422	4425	1856	1482	1666	1413	1471	2352	2312	2479	1359	2225	1246	1509	2174	1935	1682	1270	1347	1568	2497	3029	3864	2038	3970	2831	743	1695	1869.97	1858
ENSG00000047188.11	3893	4593	3953	2872	4331	1106	2775	1214	3309	2542	3022	5057	12775	16389	2078	3534	1649	4569	1700	2047	6587	2620	2037	2588	4565	2729	2695	2251	4461	2319	3664	3742	2580	4345	1775	3394	2236	3608	3799	4969	8203	13601	5221	11901	5005	1892	2693	2127	4444
ENSG00000047230.10	1193	1349	1003	1280	1436	495	1072	600	1004	1184	2009	756	3514	2208	1903	1311	2264	1787	396	1282	2621	1298	701	1101	855	734	1433	1364	2127	468	3000	1418	683	1366	1588	937	2336	1201	1440	1591	1702	3412	1388	2503	2094	294	615	749	1229
ENSG00000047249.12	3546	2959	3948	5022	3199	1740	4545	1868	4268	3190	4463	5123	5407	4591	3502	6590	3638	5766	2318	2507	4703	3919	1517	1809	4018	4059	1969	3599	6091	2726	5665	2220	2183	2463	2818	5184	3525	3738	3663	4801	4330	6041	5361	4505	5246	2434	1732	3251	5017
ENSG00000047315.10	11109.58	14085	12958	9981	11344	4611	12505	7631	13056	8612	8112	12110	20771	18659	6046	12864	9883	20273	5667	6210	25958	10501	6798	5030	9405	11700	7891	11040	15744	6676	13109	12999	8100	9921	9715	9795	10905	11402	14341	17377	10322	20694	16757	22881	21344	6922	6496	8286	12129
ENSG00000047346.8	1887	3302	1732	1177	5416	1088	1518	1367	1239	887	918	1637	5246	6419	1467	1426	392	1191	1527	1297	2332	1516	1625	1808	2994	1188	2007	693	1234	794	1715	902	1069	3992	768	1415	329	1204	1384	3199	3310	4085	1602	7643	1529	792	1380	981	3418
ENSG00000047365.7	172	13	1032	2390	226	48	45	4	32	3291	1899	10803	9	236	2746	359	1568	202	138	94	100	300	112	164	846	7657	1	495	78	24	1975	362	4	470	284	10841	1471	371	438	311	45	24	2888	75	2577	33	594	24	1847
ENSG00000047410.9	15082	16292	14063	8924	17024	7518	22913	7596	16368	8715	11164	15893	38967	30230	7934	22750	14271	30653	16237	9135	31205	14079	11390	9873	15319	9027	10583	8246	21753	7814	15229	11931	13191	15046	9701	11928	11359	9699	15166	26218	21937	31591	23121	51517	30161	7768	7332	10817	20323
ENSG00000047457.9	0	2	0	0	53	202	4230.79	98	0	16	10	0	4	110	0	353	0	20	0	30	0	6	287	0	7824.17	0	4	0	21	817	0	2	49	189	73	4	0	0	9	0	37	2	0	15	0	165	43	45	15206.16
ENSG00000047578.8	1831	2158	2293	2488	1659	1175	2585	764	2015	1595	2933	1809	3517	3620	4654	2145	2262	2485	848	2703	3182	3558	1392	2127	2116	1356	1916	1965	2933	1140	3467	1030	2134	3591	1798	2223	1459	1410	2285	3374	2207	2906	3527	3516	3110	1307	2557	1920	2425
ENSG00000047579.15	210	312	82	130	769	174	210	86	141	111	441	300	424	672	488	184	277	253	154	349	440	204	170	444	145	173	125	148	300	78	491	170	154	243	103	269	256	52	221	405	372	484	246	501	206	86	131	121	184
ENSG00000047597.5	4	13	145	3	16	3	14	29	0	49	53	187	4	4	35	9	129	36	0	0	10	3	0	0	20	49	15	3	36	44	221	4	0	0	144	88	266	0	31	12	0	8	48	7	45	3	5	16	46
ENSG00000047617.10	849	2341	4	0	3785	5	7	1	0	0	57	6	2974	5495	106	15	28	10	0	454	3964	0	3	980	9	0	2115	0	2	0	55	1015	2	46	6	1	81	435	2	7	6453	2064	1	2595	6	3	0	0	18
ENSG00000047621.7	2041	1912	4370	2535	1544	956	2504	1250	4166	1189	1748	1567	3589	2569	903	3874	1322	5204	1600	1182	2834	2252	1395	1176	2865	986	1323	2158	3061	1831	2315	1335	1906	2318	1908	1314	1998	2395	3487	2981	2038	3017	3202	2901	2672	1261	2094	1926	4442
ENSG00000047634.10	1362	705	1139	803	732	370	936	238	1258	470	253	1108	907	895	372	594	378	939	368	554	987	695	630	479	1560	391	417	651	596	568	442	535	989	1359	620	374	578	1030	837	1243	641	917	1086	1179	1315	554	793	383	2243
ENSG00000047644.13	7085	6204	7693	4535	9378	1381	2783	1849	2037	2984	4830	3728	9230	15406	9259	4699	1994	5786	1283	6453	8323	2764	1691	9697	3192	2018	6555	6214	3142	2261	5765	4383	1423	6111	6189	3279	1832	8337	3137	2665	14703	8264	4158	14889	4076	1684	3941	3269.14	4491
ENSG00000047648.17	12	66	206	0	15	4879	1237	1962	3924	10	216	2	255	6	1657	796	951	740	1474	208	49	1477	7044	133	75	6	89	313	224	2062	339	11	2941	972	834	47	288	122	1140	1617	4	87	789	35	476	3910	75	4595	194
ENSG00000047662.4	0	0	0	159	0	1	0	0	0	0	4	2	1	0	1	42	50	13	0	0	3	3	0	0	0	0	0	0	6	14	4	0	5	6	0	0	9	0	3	0	1	3	2	1	3	0	6	16	0
ENSG00000047849.17	34899	24758	17846	13353	13626	11208	16162	24190	27006	15136	19733	12502	12655	23578	34898	14832	21268	13754	6483	31709	17179	28307	14616	28944	30004	8486	17130	26663	18464	18806	23585	4733	17127	30381	36243	14500	21839	28605	17529	35953	9003	16574	21135	26934	18397	19953	25257	27812	31623
ENSG00000047932.9	2671	3681	11570	1981	4198	2951	5200	3913	7699	3480	2773	8425	12592	6859	3206	9656	2284	9622	4132	2991	6648	6129	4096	2726	7822.02	8025	2467	8471	11193	2298	4589	3878	2805	5453	7971	6901	2694	3662	8037	6118	7247	8537	28608.5	8823	13090	3073	5688	4621	11624
ENSG00000047936.6	0	0	99	0	0	1	0	24	694	140	3	4	0	0	26	28	0	25	0	1	0	1	55	10	505.98	54	0	347	4	0	18	0	88	5	305	91	1	0	3	0	0	0	618.5	0	610	0	22	83	918
ENSG00000048028.7	2755	2386	2849	1670	3479	651	1602	1135	2024	1760	1631	3194	5539	3436	1975	3211	1539	3940	396	1137	4488	2683	1035	1305	2183	2423	1559	1934	3225	1001	2042	2355	1620	1757	2607	1735	2230	1975	4017	3186	2435	6330	4020	5063	3670	1046	1711	1574	3028
ENSG00000048052.17	5565	3019	1531	670	2040	67	2319	2	1388	190	8593	3615	1436	2552	1736	6268	4317	2446	808	2732	848	938	54	1734	3575	1228	828	572	3613	523	11436	185	371	1764	347	1840	3225	665	523	710	110	1224	2275	260	4417	659	1046	356	5573
ENSG00000048140.13	3604	2865	2268	2004	3588	886	2453	1169	3093	2442	3866	2820	4653	3713	4719	1491	2574	3457	828	3196	4111	2655	1456	2295	1682	2889	2307	3103	3031	1399	4322	1799	1511	1403	3016	3851	3056	3700	2327	2681	3437	5102	2632	3628	2622	1231	1574	2471	1887
ENSG00000048162.15	942	552	350	243	569	333	468	136	1527	1129	472	821	566	607	325	285	785	999	634	437	1535	195	531	452	245	1039	283	211	775	246	562	472	607	152	512	764	1264	829	332	147	402	624	367	346	691	465	98	462	273
ENSG00000048342.11	359	2022	2288	3126	509	1082	3387	1694	1909	1087	1285	771	1114	936	2224	1906	816	2178	1857	1241	2038	3219	1211	964	3547	515	1094	2491	2078	938	1470	315	2557	3919	2246	565	1081	86	3618	4854	511	840	2565	1168	3251	1115	1338	1360	4312
ENSG00000048392.7	5867	7161	9921	2812	6628	2103	9584	2928	4575	2367	5358	10198	10343	9549	2342	22539	4725	12337	5252	4824	9091	8874	3674	3331	5689	4848	4508	6110	12223	2642	6818	5796	3920	4714	4623	6743	2825	7283	14439	6611	6189	10407	11354	9575	6447	2048	3189	2352	12329
ENSG00000048405.5	1748	3424	3026	2198	1302	1228	1478	1815	4143	1182	2127	2558	3061	2250	1624	1856	1309	2251	737	1276	1833	1850	1913	1998	2976	1895	2433	1415	1301	1024	3139	980	2636	3309	2042	1949	1574	1662	1742	2288	1846	2025	2339	2644	2554	1067	2195	1657	4006
ENSG00000048462.6	0	0	0	0	0	0	0	0	0	0	0	0	0	0	0	0	0	0	0	0	0	0	0	0	0	0	0	0	0	0	0	0	0	0	0	0	0	0	0	0	0	0	0	0	0	0	0	0	0
ENSG00000048471.9	2914	2535	4655	2764	1686	2122	3334	1882	3545	1061	3329	1245	6382	3581	6930	3313	2044	2397	1966	3134	2364	7094	2578	2819.97	5435.65	655	1747	1947	2327	1503	3835	790	6242	15317.91	1844	1707	1124	1923	2586	6429	2250	3799	3317	3648	3829	1085	10005	1986	7324
ENSG00000048540.10	0	4	27	119	0	1673	32	88	25	689	0	35	0	0	0	46	0	13	227	0	3	110	2409	0	27	22	0	64	33	649	0	3	1026	1117	0	260	0	0	13	63	0	0	1488	0	936	292	177	854	4
ENSG00000048544.5	3663	2572	4029	2113	2934	820	3267	2091	4446	2425	2642	7142	5212	2185	1742	3455	2966	5485	544	1956	4514	2801	1506	1488	3185	5011	1575	4555	4093	1648	3961	2572	2356	2644	4416	5458	4394	3501	3817	5232	2851	7899	3827	4067	6063	1621	1611	1788	3401
ENSG00000048545.9	0	0	1	17	0	0	0	1	0	1	39	0	0	0	65	0	113	0	0	0	0	13	0	12	2	0	0	54	34	0	13	1	0	4	12	0	69	0	7	5	0	0	0	0	1	0	6	1	5
ENSG00000048649.9	3353	5162.67	5326.12	2889.58	3656	3654	4204.63	5839	4303	2596	4716	3539.72	7698.46	5495.54	3031	5950.79	3667	7586.22	5710	4069	7057.44	3687.73	5990	4537.08	4928.2	2029.43	3558.52	2976	4821.86	2539	5305	3073	2833.23	5561.15	3970	2790.32	2535	2827	4861.13	6651	3743.61	5712.75	6894.98	8460.71	5949.51	2442	2905	2739.32	6950.36
ENSG00000048707.9	8812	12462	18036	9130	9053	4963	8980	5260	11480	7637	9093	13424	18362	14533	11714	13874	5197	12178	7809	8165	13012	15462	7342	8758	22559	8354	8933	7682	10074	6889	11062	5481	8120	14535	7725	10719	4506	7621.01	11351	15621	12137	15948	13733	19262	13680	6726	11683	7128	25871
ENSG00000048740.13	2980	3974	236	20446	1047	1594	1710	1548	2602	502	2845	1029	343	4102	2462	3417	2223	1203	3035	4199	2823	5180	2297	2976	3954	430	2354	6	1406	3060	3432	438	6390	11729	735	613	1232	345	4350	4316	1120	1728	1772	3463	908	2069	2304	8729	2341
ENSG00000048828.12	19086	15348	19732.92	10347	10214	9542	10534	8702	22874.99	10597	9451	15659	15470.6	15233	14704	10925	11540	19917	3682	9883.44	14637	17807	12740	10027	16173	7450	12033	15509	13363.57	10304	11171	4914	13821.98	17702	13570	10966	11839	19800.07	11279	17151	9252	17452.95	15963	29750.75	15541	10646	13012	9998	18812.95
ENSG00000048991.12	1886	1180	1370	595	510	1237	451	1424	1437	1291	1538	833	1109	1026	1664	582	1329	909	279	1239	856	625	1670	1702.45	1444	349	749	1127	675	760	1729	313	843	1023	1238	613	1596	2132	656	1579	737	1024	865	1733	978	602	643	1195	1376
ENSG00000049089.9	13	9	31	12	16	65	46	315	0	36	1292	64	69	45	1062	76	481	18	61	84	7	377	114	7	53	4	9	45	140	110	1770	6	48	100	260	8	664	0	124	127	45	36	54	48	26	153	100	224	60
ENSG00000049130.9	16205	4298	2239	487	4967	1442	21154	7073	16231	1662	2086	15973	2146	5342	5677	14309	8777	13439	1335	11936.05	7402	12295	2257	7420	2266	4206	1090	2128	2852	2882	2408	4804	4515	22702	5925	3619	9396	10060	9936	21023	399	2735	21864	2012	37721	2522	10394	2563	4171
ENSG00000049167.9	748.55	576.22	949.71	500.69	521.58	359	704.66	408.17	1011.94	579.29	920.87	1167.92	1573.15	1022.67	670.96	810.17	549	1359.35	128	398	1170.39	852.6	417.69	258.04	1029.58	1111.4	465.13	668	1289.63	403.72	1463.54	411.79	817.6	819.15	756	825.23	764.71	426	906.78	1435.28	966.37	1627.42	1128.22	1366.17	1226.56	520	579.88	713	1139.1
ENSG00000049192.10	2635	3619	7492	131	3412	70	1933	1071	5151	287	1371	2336	5452	17866	721	17790	932	20699	2317	822	6432	2023	139	1705	11417	1185	4077	2444	12124	290	1726	4634	3015	4199	4252	546	1025	3520	3915	3789	7316	7569	13832	4881	16601	310	4817	388	8613
ENSG00000049239.8	5297	7694	7163	3960	4115	20123	9442	18478	11167	1979	7472	4045	13147	5882	23879	7462	3805	4838	4940	9123	6161	16147	26027	10786	17642	1825	6296	33810	8056	8274	8882	1902	11950	15357	19482	3394	2505.07	6681	9514	20752	5233	9657	18385	12687	12206	10324	10498	13460	18655
ENSG00000049245.8	14275	8078	7029	5387	8042	4892	7430	7956	7922	5834	7703	3971	12315	8824	7146	6516	6687	5889	1359	11279	8906	6330	6410	8658	8826	3577	5985	9552	7302	7039	10054	3495	4667	7870	8863	3640	7234	12927	5821	9525	7990	11342	6203	12635	5795	6813	5060	8983	12855
ENSG00000049246.10	469	331	654	1982	369	539	945	467	695	265	462	1055	640	970	875	440	399	502	1323	357	143	1543	619	518	2014	564	455	539	460	158	897	222	282	3939	768	973	390	274	1732	1470	365	318	1344	393	1230	184	2066	247	3061
ENSG00000049247.9	0	0	0	3	0	0	2	0	0	5	0	0	0	0	0	10	0	0	0	0	0	0	0	0	1	0	0	0	1	0	0	0	0	0	0	13	0	0	0	0	0	0	7	0	0	0	0	0	5
ENSG00000049249.4	70	49	28	0	26	0	0	0	29	0	326	317	1	260	42	17	46	11	27	119	45	13	49	263	10	46	56	37	134	44	329	11	0	0	134	560	98	0	2	0	7	28	0	6	2	0	0	2	41
ENSG00000049283.13	7	5	4	0	6	0	12	7	14	2498	38	278.26	3	8	55	1	95	1	0	451	7	4	0	7	0	159.18	1	8	3	0	54	9	0	0	28	626.82	105	0	7	0	1	8.1	0	0	7	0	0	16	0
ENSG00000049319.2	0	0	0	8	0	0	0	0	0	0	3	4	0	0	0	0	0	0	0	0	0	0	0	0	0	1	0	0	0	0	27	0	3	1880	0	3	4	0	0	1	0	0	0	0	0	0	309	0	0
ENSG00000049323.11	4770	5423	4595	1421	1987	12065	76231	60628	56537	7167	6835	1173	44628	4716	20209	67674	7605	46638	6433	9735	2528	73458	15958	6045	35730	1242	14118	64846	62920	13935	7260	2331	39664	45230	64314	1861	1975	23909	31624	122835	7323	6998	96339	25382	91404	20300	36928	5803	41372
ENSG00000049449.4	27475.73	21423.1	27685.68	2861.68	33183.31	23949.2	15407.1	14613.21	22855.44	2878.93	11886.57	13381.74	23192.12	35716.7	12140.79	42101.6	20412.01	38441.5	18425.23	19062.68	57666.51	32895.98	35178.59	17711.14	21690.76	9825.38	20310.36	29457.66	37705.92	31773.1	16568.08	17230.42	16657.23	18627.04	26944.1	9649.82	10343.78	19249.82	25734.66	34375.17	16575.3	30125.58	44436.04	58996.72	31164.49	33239.99	25409.47	28397.04	23409.01
ENSG00000049540.12	27	23	18	0	24	1045	4415	995	7224	1	3	1	1776	9050	54	487	9	765	1091	15	13	573	1673	23	15552	3	1168	11	52000	2275	0	17	106	1642	43	6	0	0	669	395	1742	1148	195	438	111	1327	1938	16612	19682
ENSG00000049541.6	2486	1172	935	892	1812	274	1271	860	1726	1489	888	659	1115	1159	870	616	2809	3044	60	596	2214	453	385	573	570	564	643	1868	1098	595	889	975	867	539	1805	707	4431	2260	629	1619	953	2112	829	1611	2792	322	252	613	681
ENSG00000049618.17	3872	3659	2638	3605	2835	3861	2715	5713	2848	2774	7110	2439	6806	6130	8458	2763	2688	3790	1552	5464	3929	4642	4707	5495	3867	1546	3008	2185	3179	2474	7520	1311	2354	4433	4220	2346	3193	4190	3489	6602	3953	4904	3960	6804	3781	1914	3375	4229	4605
ENSG00000049656.9	9748	6734	7326	4942	9549	2954	9660	3123	12138	5872	8018	14329	14851	13897	7084	15171	5939	20767	1548	5918	15219	7657	3701	5353	5574	14566	5124	6647	11252	6583	10233	6824	4313	3829	7045	11867	9688	9958.97	7297	9282	14555	16832	14083	18263	12758	5183	3869	6145	7176
ENSG00000049759.12	10594	2749	3404	24655	2527	581	126	1247	740	3363	10962	1262	2147	5137	9770	2000	13869	1050	488	3930	880	1571	626	4526	3794	968	2186	1073	455	659	15166	417	531	1362	1660	1092	10316	4442	1283	494	1462	2367	985	3677	729	960	1841	1191	10995
ENSG00000049768.10	4	0	7	12	0	1	1	1	0	0	12	1	0	0	2	0	0	4	0	0	1	0	0	1	3	0	5	0	2	0	27	0	15	7	15	0	3	22	0	0	0	0	0	0	0	0	0	0	1
ENSG00000049769.8	138	183	404	538	184	473	363	233	262	381	319	404	264	322	512	923	246	508	405	309	181	938	458	308	207	190	82	210	445	179	427	172	157	539	277	286	78	55	950	371	465	231	746	244	321	7	426	616	291
ENSG00000049860.9	12546	4370	8387	9635	8300	4374	9612	4439	8968	3516	5653	10448	12488	6958	10785	19045	5125	8037	4109	8487.01	9488	21868	7734	6911	12357	8924	3321	11151	10522	6519	6600	4688	6404	9015	8183	9416	6963	10287.23	10677	21956	6330	9713	19709	10731	13979	6690	4956	8361	12909
ENSG00000049883.10	550	539	839	979	308	479	582	846	1433	465	674	910	482	426	518	1109	385	1175	414	335	600	900	569	316	778	402	332	945	608	353	814	476	1070	1073	754	406	538	613	1014	1353	299	564	1058	562	964	617	653	431	1449
ENSG00000050030.9	7	12	0	0	0	0	1	0	5	0	63	6	1	11	33	24	10	5	0	5	0	0	0	0	90	12	0	0	8	0	93	0	0	0	3	18	24	0	1	4	5	3	4	0	10	0	1	3	132
ENSG00000050130.13	2904	2949	4164	3395	2568	1242	4364	3720	5247	1833	2510	2339	3797	3309	2364	6041	3166	6681	956	2072	3522	2660	2053	1599	3799	1642	1593	3492	4552	3143	3181	1596	1672	2596	3194	2131	2991	3606	2957	4610	2589	4065	4179	4022	5730	2793	2359	2993	4763
ENSG00000050165.13	12295	12797	18185	197	6851	3457	13407	11403	1249	10578	10203	5970	37310	24757	8054	25109	7587	7261	5310	65183.99	17077	31434	4371	40064	2977	3634	9839	13911	24985	4411	13493	7877	664	21833	26040	8014	3873	12741	32031	29907	20631	59881	29162	14587	18176	3534	25216	9387	9340
ENSG00000050327.10	118.87	43.3	488.79	460.16	41.32	281.81	272.37	123.71	275.09	5536.24	3202.17	2693.81	57.77	8.83	5187.65	204.9	4692.12	419.6	93.07	399.09	83.46	730.67	335.19	125.97	555.87	1414.35	26.39	921.47	326.54	232.71	3458.93	91.75	237.74	312.16	734.95	2648.65	3631.16	402.07	428.7	563.69	15.72	54.3	633.54	42.37	282.51	387.98	710.17	1012.64	1259.81
ENSG00000050344.8	7992	3936	775	2515	2513	107	106	612	52	1467	6197	1141	1139	9591	4115	856	10205	214	70	8245.75	6639	640	31	6327.23	84	726	4765	3742	602	230	7514	5929	1	13	6659	846	12746	10839	798	169	1733	4348	423	5196	784	123	26	152	298
ENSG00000050393.7	2739	1525	1739	1355	1415	934	1644	1309	2499	1717	2589	3164	1852	1255	2346	1928	2726	2521	766	1483	1577	1661	1248	1234	2114	1833	851	1483	1329	1205	3176	624	1252	2307	2320	2147	4156	1892	1172	1867	1661	2169	1979	2769	2261	1085	1259	2326	2247
ENSG00000050405.9	13233.26	11700	32998	14333	4666	6165	8770	3254	11636	11531	8847	22491	4192	10379	6258	16028	7737	17251	8029	9407	9090	11137	7766	5826	47652	10966	8447	20047	27001	8005	12704	5354	9712	15600	7522	11182	11641	16138	8551	19442	2920	7573	9708	10125	11798	9383	22112	13676	57811
ENSG00000050426.11	806	846	761	1013	1256	1447	1426	4347	1210	1122	1661	2521	3063	1376	2337	2389	1275	954	640	897	1425	2786	2032	727	2072	2733	981	1386	1814	1079	1895	499	1522	2203	1537	1774	944	1058	3128	2302	1107	1982	2242	1840	1483	1033	963	2077.47	2180
ENSG00000050438.12	329	353	769	22	307	6	545	188	71	13	207	208	546	298	326	93	99	365	52	437	1619	826	54	313	518	63	185	363	27	23	248	301	36	1196	262	89	201	900	707	2282	106	424	663	198	1483	2	722	1	1045
ENSG00000050555.13	20	10	49	133	5	458	12	371	0	1	1827	2	583	71	342	10	63	12	6	103	9	73	766	16	7	0	3	82	69	0	1813	7	55	185	485	1	23	0	3	15	569	545	157	715	108	0	199	348	8
ENSG00000050628.16	0	1	152	9	18	2	22	18	0	0	132	10	4	1	0	336	200	224	657	3	9	2412	0	6	8	6	0	0	59	14	40	7	72	900	38	4	88	65	161	749	11	1	701	1	2584	9	1244	125	5
ENSG00000050730.11	142	32	5	20	32	6	2	0	46	0	6	0	4	20	48	12	10	8	0	133	38	15	9	169	10	0	0	5	3	9	25	15	31	37	27	0	3	52	12	31	5	7	11	9	37	34	78	0	73
ENSG00000050748.13	2710	2160	2576	1294	2116	1258	2191	1532	2641	1643	2832	1973	3815	3183	2045	2225	2534	4092	1122	2026	3191	2188	1343	1851	2628	1752	1415	2215	3780	1730	3202	1568	1395	2441	2619	1924	2397	2671	2586	2816	2735	3427	2701	3682	3111	1559	1495	2022	3085
ENSG00000050767.11	0	1	0	24	4	37	1	0	30	24	21	10	80	6	0	36	0	10	32	3	2	3	29	0	0	22	1	0	6	100	14	8	7	717	0	14	0	0	5	9	49	21	0	10	3	0	1007	1	3
ENSG00000050820.12	31181	18102	8175	3067	9111	3116	3881	6251	6230	6256	10508	3814	16005	23790	24582	6339	14698	7452	1390	21448	18472	6289	4259	18073	3799	4668	22794	8790	5333	5594	10707	5355	3013	6811	10492	3998	14686	28182	3742	4455	15758	19421	6701	39015	6311	6477	7647	13155	4603
ENSG00000051009.6	1340	1247	1101	1645	772	917	767	1135	1974	1478	1614	1151	1240	1137	2060	1118	1129	1167	355	1293	920	1409	1129	1200	834	775	1141	1074	1025	677	1837	525	1186	1432	1503	963	1214	1437	817	1429	916	1152	1569	1276	1434	1296	1393	1415	1226
ENSG00000051108.10	3845	2648	3872	2397	2755	3357	2741	3730	6659	1401	8900	9836	10214	4068	6058	4593	1395	4675	1090	1994	3070	3001	3698	2144	4971	5418	1995	5346	8110	3797	11841	1155	1937	3709	8713	4608	2955.07	2228	5809	4476	9691	7570	18757	5638	4938	4362	3421	7848	7421
ENSG00000051128.14	4855	5065.76	1781.81	1281.92	7277	1909	5128	2075	2767	4530.57	3150	2185.99	6356	9963.7	7776.81	4129	4627	7569.88	1539	9063.99	11523.45	3103	2385	14182	1717	5947.63	4173.23	2904	6097	3460	4009	4115	1612	3524.85	2932	3469.97	3488.01	3306.69	2848.92	4146	15899.51	8336.82	4133.18	7080.77	4414	2075	3746	3590	2301
ENSG00000051180.12	893	271	205	191	882	25	519	61	389	652	123	26	283	590	162	81	1358	1302	87	88	873	53	99	234	117	10	136	367	330	250	98	367	186	77	812	38	1534	844	46	314	177	953	260	901	799	215	46	155	277
ENSG00000051341.9	2043	1198	1680	1586	2301	37	1422	281	1690	1178	360	219	601	1691	163	532	2484	4482	81	113	2567	242	198	325	588	161	351	1163	728	224	703	1527	1135	495	738	200	2156	1513	484	2110	271	2048	1607	2655	6289	119	169	19	1338
ENSG00000051382.4	1601	1543	946	2356	1746	648	928	595	1324	1271	1893	2681	3209	3794	1957	1947	1513	2057	266	1075	2247	1369	873	1402	1486	1301	968	915	1421	1031	2227	918	444	1339	1493	1763	1041	2911	1130	2411	1726	2990	2244	5398	2162	515	566	389	1945
ENSG00000051523.6	4759	1879	3395	3911	4012	3213	10226	3396	4217	4993	17074	1805	13098	5922	31482	9385	18672	7625	401	7776	4246	6568	4246	4436	2837	2955	3896	5768	12285	8531	14933	274	630	3364	16055	4353	19217.02	3060	3529	5248	14361	16856	4838	3381	3216	8081	2815	6357	3720
ENSG00000051596.5	4721.95	1670.9	1841.39	1329.99	3771.3	547.37	1664.66	2027.84	4051.81	7064.31	1715.88	3076.41	4151.2	3206.3	1709.11	2429.95	7602.46	5630.13	369.55	2273.67	7972.13	1908.42	743.36	1738.45	584.47	8656.52	1784.28	2147.15	2022.33	935.81	2353.06	3123.67	1978.14	876.14	3551.97	4986.6	3707.57	3333.82	862.18	3778.37	2382.83	6123.81	2362.8	2422.4	5098.19	810.02	321.61	1927.59	1313.52
ENSG00000051620.6	5832	2375	2514	959	4044	1426	3131	4055	3790	7069	4721	10078	3832	2455	2452	4699	7048	4669	898	2026	5296	3978	1601	2445	6581	10585	1937	3952	4190	1767	6182	2029	2566	3171	4808	12306	5740	3294	4561	6239	3680	4767	5155	3169	5134	2503	2849	1413	8706
ENSG00000051825.10	2869	2775	4079	2709	3506	606	3102	1535	3037	1580	1262	1904	4485	3660	2075	2326	2901	4741	643	1357	3823	1716	1066	1131	2591	1286	1788	2570	2970	1237	2444	2559	2253	2761	2156	745	4388	2936	2383	5084	2432	5844	3638	6733	6834	1437	1683	1089	3859
ENSG00000052126.10	630	1190	3459	20136	1263	2042	2582	3731	1426	1868	2025	2555	1822	1728	4695	3871	2653	1954	1254	1213	2289	5289	2596	864	2263	2749	891	2562	3213	1190	3253	726	2385	5070	2503	3430	2379	1225	3588	7663	1708	1566	3508	2068	3758	1051	3039	1646	2664
ENSG00000052344.11	0	0	0	8	0	0	0	0	0	4653	8487	2036	0	0	959	0	3395	0	0	43	0	0	0	4	2	846	0	0	0	0	8852	0	0	0	259	1888	1660	0	0	0	1	0	0	0	0	0	1	7	0
ENSG00000052723.7	3351	3352	7219	2506	3446	1892	3528	3502	4065	1854	4689	5200	5241	3749	3652	5718	3332	6356	1945	2366	4772	3884	2746	1832	6477	4206	2633	3545	4822	2376	6311	2420	2920	4386	4423	4823	3726	3539	5508	5489	3027	4784	5503	4543	4507	2929	4102	4031	7548
ENSG00000052749.9	5012	2340	2832	2197	1185	1263	1681	579	6289	3140	5344	7008	2034	2600	3828	1936	3447	7001	710	1560	3737	2012	1456	2064	1402	4221	1837	3440	2185	1197	6135	1093	2401	1267	3088	3518	6137	4162	1488	1586	1591	2426	2385	2678	4337	986	1502	1326	1607
ENSG00000052795.8	3386	2459	2348	6981	5572	1411	7110	1036	3450	1015	4476	3010	16512	6611	7521	5114	2417	3012	1740	2104	3001	5192	1392	2312	10212	2292	2050	748	8091	1240	6066	2176	2547	2552	1519	2696	1907	2897	2435	5119	6503	8458	5295	10877	4204	1080	2146	1780	11025
ENSG00000052802.8	7529	6573	41232	14029	9591	2014	9056	2486	7572	21488	11672	30189	5028	3665	9471	14108	7079	11600	3779	4355	5627	5295	2649	3354	5305	13462	2171	40627	14115	7094	17468	10294	16275	13282	25838	11900	16793	3504	18533	16083	7924	16972	47953	12389	32383	4979	11805	14042	10438
ENSG00000052841.10	3624	4391	6857	3563	4744	2758	5580	11083	5148	1822	7392	11518	13824	9204	5881	8873	3090	6382	1586	4037	8868	8815	3955	4271	5784	9673	4488	2997	6700	3084	7383	3629	3968	5088	3950	6777	2791	4531	10909	10129	7320	8728	10227	9337	7077	4061	4404	4645	7455
ENSG00000052850.5	0	0	0	0	0	0	7	0	17	0	0	0	0	0	0	0	0	0	0	0	0	410	13	0	30	9	0	0	0	0	0	0	0	6830	0	0	0	0	0	146	0	0	0	0	3	0	2002	3	9
ENSG00000053108.12	0	3	0	15	0	0	1	72	0	32	0	18	24	29	63	9	0	0	0	0	0	6	0	8	0	0	6	0	0	0	0	0	0	1	23	5	0	0	1	0	11	3	0	10	0	0	0	0	3
ENSG00000053254.11	6337	4370	4920	3073	2894	5479	1681	7762	4061	2097	6050	1645	6012	8195	6604	3924	4339	2503	4979	2991	3180	7495	9287	3812	10121	1009	3774	1752	3150	6083	8143	1070	3133	9067	7020	1372	4152	7103	7242	5981	8967	5575	3128	10821	1314	5282	4852	7957	9983
ENSG00000053328.8	0	0	1	0	0	0	74	1	0	0	29	0	0	3	256	35	24	3	3	20	0	11	0	0	9	0	0	1	20	0	75	0	0	33	1	1	14	0	95	16	0	0	16	0	19	0	4	1	29
ENSG00000053371.8	5447	1951	1956	2172	2464	3625	4285	4936	3253	3707	3119	1454	3578	1945	5792	2141	3809	3081	765	4014.2	3535	5431	3770	2230	1947	2101	1554	6225	4150	3226	3379	1684	2158	3839	6052	1954	3931	2772	2782	4681	2235	4223	4640	3657	3800	3290	2132	5387	2926
ENSG00000053372.4	5854	2549	1717	981	2063	1201	1969	1297	4117	3467	2801	3473	2386	2282	2105	1732	3846	5946	259	1891	4929	1200	1227	1403	1123	4254	1605	4288	2307	1466	3860	1838	2282	1008	3745	2030	8925	5546	1389	2269	1616	3064	2191	2695	5060	1851	673	1735	1258
ENSG00000053438.7	0	115	34	0	20	2	0	336	0	45	533	2	5	2	806	0	2277	7	50	441	0	50	0	300	5	2	29	119	12	8	667	0	1	45	359	0	1203	0	12	65	2	19	51	10	76	0	43	14	11
ENSG00000053501.8	355	201	374	299	448	343	674	523	493	237	262	268	606	559	641	446	400	909	242	448	772	408	482	282	424	285	279	250	1037	452	322	225	452	609	646	235	178	224	664	649	443	553	920	496	564	286	254	497	473
ENSG00000053524.7	31	153	49	160	125	21	205	41	47	5	122	62	10	47	101	58	60	12	0	169	179	1	61	238	109	17	50	49	26	15	108	85	37	155	94	35	26	136	3	30	31	61	162	42	70	4	12	17	94
ENSG00000053702.10	0	0	15	0	0	14	3	0	0	0	1	0	1	0	4	6	0	3	0	0	1	7	127	0	7	0	0	37	0	0	0	0	4	9	32	0	2	0	7	19	0	3	6	0	15	0	0	5	37
ENSG00000053747.11	1888	1552	839	16	4130	333	3745	317	797	71385	21695	175237	2653	3677	17726	1671	15005	285	862	1019	1437	4041	496	392	869	105824	1150	200	186	298	26944	628	1464	1288	4364	74914	9166	2952	2881	2698	1056	3671	9524	5886	1869	179	746	1179	2114
ENSG00000053770.7	2262	3386	4791	3322	2853	1284	2786	1370	2912	1877	2465	2038	3846	3078	2140	4255	2979	4046	1542	3480	4338	2542	1937	2253	3375	1316	1476	2064	3069	1734	3041	1651	2033	2983	1934	1808	2492	3250	2741	3647	2370	4017	2784	4547	2597	1339	1879	1924	4020
ENSG00000053900.6	1355	1235	1819	1262	1705	671	2484	610	1767	804	1098	1523	3920	2108	861	2135	864.96	2440	1073	1199	2458	1914	800	751	3017	1263	846	1976	2010	873	1621	1108	1467	2008	1285	1160	1545	2076	2090	3740	2036	3276	2515	2516	3176	1149	1097	1420	3150
ENSG00000053918.11	27	1	0	0	7	12	0	1	0	39	266	7	35	8	59	0	55	0	0	4	6	9	9	72	0	44	4	0	0	17	278	1	0	4	7	127	46	0	1	4	1	16	4	0	0	0	0	0	0
ENSG00000054116.7	3607	2306	2609	2094	3048	1035	2652	1416	3139	3222	2577	2685	3825	2912	2377	3827	2933	4585	1444	2358	4696	2635	1482	1871	2383	3204	2004	3548	3998	2010	3231	3117	1628	1821	3367	3111	3478	4130.13	2757	3630	3634	5182	3145	3095	3746	1804	1952	3419	2926
ENSG00000054118.9	14766	19330	13915	12176	13895	8146	10810	12694	16867	8704	13392	13673	25901	12957	11743	10891	8360	27602	3078	10131	19658	12636	10787	9979	17152	9459	13692	13472	14881	7388	17854	9689	11111	14503	15435	9643	13608	15153.64	9286	23169	16497	26668	12986	25919	22450	7764	12274	8833	18132
ENSG00000054148.13	4189	1363	1730	880	6738	1522	3886	1661	1788	2409	2423	2009	5851	4390	3899	2839	2777	2606	279	2669	5809	2683	2077	2433	903	1326	1289	2288	6607	2242	3209	1065	1294	1625	3346	2467	2209	2090	3776	1973	5603	9092	1905	2461	1135	2347	780	3461	1100
ENSG00000054179.7	0	0	0	0	5	0	2	25	0	65	1	208	0	0	0	0	0	0	0	0	0	0	0	0	1	38	0	0	0	0	10	0	0	0	0	74	38	0	5	0	0	1	0	0	0	0	0	3	0
ENSG00000054219.9	3726	6565.94	130.85	62.37	7638.06	325.19	586.11	121.12	19.1	145	708	289.17	5398.9	6961.56	183	355.42	1356.91	156	89	1773	9404.13	158	402.93	1998	1989.7	316	5047.06	137.82	715	887.27	1065	3838	260	3952.61	147.12	567	405	663	838	117.13	2484	5953.98	7	15056.56	64	1188	2176	76	4285.09
ENSG00000054267.16	2488.47	4161	4114.96	1899.89	4773.68	1620.51	4288.37	3179.82	2662.57	2025.19	2892.38	4149.7	13857.65	8408.9	2101	5999.16	2819	6323.44	4364	2963.26	7596.78	3495.98	2543.07	3361.67	3775.08	1880.08	2964.73	1719.2	5461.91	1701.07	3792	3546.83	2112.72	4220.75	2174.52	3722.82	2228	2158.68	5074.89	5761.3	6983.53	7678.25	6337.32	9879.39	5692.53	1780.77	2077.74	2106.59	5398.51
ENSG00000054277.8	934	644	2536	1527	1064	408	831	727	2181	1714	1432	1736	2386	1960	7981	3427	5114	2456	85	1851	1563	1680	621	1133	210	1179	1066	1801	1939	493	2172	1073	1268	699	1346	1838	5527	1773	1851	885	2651	2015	1515	2411	1223	704	784	3333	388
ENSG00000054282.11	1271	1939	1730	752	1652	1377	6508	1134	2548	896	1609	1847	2745	2000	1103	10217	1925	9232	2868	1550.83	3159	2615	1819	1244	1477	1659	1395	1444	4008	989	2261	1313	2501	2096	1802	1837	929	1255	4070	3883	2052	2522	4661	2662	4712	1445	1026	1881	2298
ENSG00000054356.9	0	0	49	35	4	264	32	4416	114	0	189	0	0	1	82	1558	83	280	103	95	1	2605	174	11	12	39	0	137	5	58	185	30	84	45	2151	3	97	0	1292	477	2	0	6399	0	1134	32	27	334	27
ENSG00000054392.8	229	230	1223	983	265	364	700	27	254	206	1320	347	463	338	2822	1200	1590	646	291	708	265	394	675	308	326	351	150	170	186	164	1767	98	77	531	435	409	1144	193	342	101	188	253	842	241	257	105	598	222	936
ENSG00000054523.12	8687	9012	8178	4666.66	7487.81	3636	6000.44	5724	8737	4785	8455.5	9651.18	18625.05	17564.3	8928	7844	6608	9937	4010	8136	11132.5	7818.08	4364	7163	8148	4977.42	4724	4770	8002.1	5266	11125	4701.66	6129.32	14760	7075	7462.04	4866	6949.85	6313.52	13630.14	9711.07	14173.5	9891.81	24885.23	12300.2	3893	6574	4600	10476
ENSG00000054598.5	1377	1354	247	95	583	416	4579	157	973	984	2845	908	964	969	5155	429	3695	383	292	517	1237	869	476	610	8202	418	1510	278	695	1285	3791	311	271	426	508	472	2348	505	137	728	938	787	217	1842	209	691	176	1071	11354
ENSG00000054611.9	2295	2012	1261	1161	2033	1058	1430	1739	1725	2034	3150	1275	3072	2290	4209	1604	2927	3006	788	3195	2954	2533	1615	2449	1887	1072	1883	2013	2240	1988	3221	1033	1276	2081	2414	1528	2109	2489	1436	2092	2476	3336	2049	3307	1599	2156	1781	2384	2229
ENSG00000054654.11	17959	11430	4076	14073	26296	3700	3437	998	1493	10596	9768	24317	39921	37972	17487	4537	17251	4472	6933	4968	13095	3276	5232	7343.69	6383	9548	9330	3470	10174	3693	12005	6840	4234	12866	2582	12138	7885	4930	3644	8686	17293	42379	8910	53725	14271	6308	4964	8605	7505
ENSG00000054690.9	18	12	54	6606	15	22	25	68	17	532	1777	418	24	59	2359	95	1052	29	0	250	48	27	9	80	32	403	27	3	39	4	1873	9	37	62	44	605	1139	76	51	39	18	32	86	16	149	1	51	75	49
ENSG00000054793.9	9636	7555	1719	2135	5579	3743	11605	453	3492	1658	9528	11776	29769	16416	17488	13188	7035	9334	3321	12949	10003	25932	5190	8861	5950	7387	7317	581	10308	1759	12067	4229	7501	12446	8001	6801	4896	8857	17221	22487	20748	32490	10135	19071	4656	2010	7566	2488	7750
ENSG00000054796.8	0	0	0	0	0	0	0	0	0	0	0	0	0	0	0	0	0	0	0	0	0	0	0	0	0	0	0	0	0	0	0	0	0	0	0	0	0	0	0	0	0	0	0	0	0	0	0	0	0
ENSG00000054803.3	0	0	0	0	0	0	0	0	0	0	0	0	0	0	0	0	0	0	0	0	1	0	0	0	0	0	0	0	0	0	0	0	0	0	0	0	0	0	0	0	0	0	0	0	0	0	0	0	0
ENSG00000054938.11	0	0	0	0	0	1	0	0	0	0	0	0	6	0	0	8	0	0	0	0	0	0	0	0	11	0	0	0	0	0	0	0	0	0	0	0	0	0	2	0	1	3	0	0	0	0	0	1	2
ENSG00000054965.6	2740	2361	4289	3370	1883	4030	3287	6453	4797	3022	3325	1880	4550	4908	8841	6394	2671	5913	1801	3172	2970	7771	5155	3096	5109	1139	2766	3791	7184	4621	3688	974	3482	6767	6285	1347	2514	3202	4282	8264	3041	3874	6040	6393	4198	4050	5779	5294	7653
ENSG00000054967.8	859	1120	387	336	682	80	364	318	1084	748	732	560	997	1208	337	1266	1118	2196	36	840	1354	237	121	1246	420	420	622	380	1112	512	1066	488	264	260	432	387	1478	1083	99	171	390	1167	430	908	705	469	400	318	401
ENSG00000054983.12	1492	1052	1713	1129	1292	1004	3562	2505	2155	1024	3592	1723	3957	1903	2714	4539	1743	1994	701	982	2466	2286	1808	1695	1287	1498	1409	1745	3885	3037	4894	1164	1594	2094	2169	2046	1804	1552	2354	2460	1559	2697	3075	2025	2276	2605	2310	2192	1933
ENSG00000055044.6	3406	2537	2517	1512	1818	884	2431	1645	4857	3451	3020	4651	3477	2866	1373	2449	3930	5573	1374	1381	4753	1624	1847	1445	2230	3219	1451	2269	3097	1767	3599	2973	2280	1485	2950	2685	5396	3434	2159	3572	1920	3283	3235	4068	5063	1395	974	1490	2485
ENSG00000055070.12	11674	9375	7480	6238	2753	6101	2854	7329	10997	6384	10534	2403	4826	3793	9955	1881	10579	7862	3823	7300	4621	4644	7779	5826	7534	1267	7600	8925	4512	5679	12539	1342	7212	9880	10368	2216	12666	10099.71	2821	6432	4229	6362	3053	6852	3533	5647	6522	7433.03	8130
ENSG00000055118.10	0	0	182	0	0	0	2	12	37	0	304	9	1	4	175	0	165	0	0	53	3	30	0	2	38	3	6	709	5	3	232	6	0	12	4	11	160	0	657	0	2	4	422	3	542	0	0	17	158
ENSG00000055130.11	5410	4093	5667	4540	3963	2381	4537	4058	5014	3731	3460	8237	9037	6610	3445	5853	3640	8004	1007	3658	6882	4562	3735	3032	4953	4310	2613	5875	5634	3235	4714	2585	3005	3752	5213	4561	5305	5609	4933	6106	4406	8566	6617	9110	7649	3700	3183	4015	6915
ENSG00000055147.13	1925	1701	3437	1537	3350	724	3086	1070	3119	723	1204	2816	4912	2432	818	4273	629	5104	1233	1135	3436	2786	1308	999	2680	1792	1347	2089	3645	1529	1845	1955	1574	2556	1819	2370	986	1388	3924	4194	3473	4146	3569	3227	2850	2059	2164	1603	3361
ENSG00000055163.14	3367	2233	1227	1047	1244	104	1644	432	676	975	8531	195	859	2972	4015	2312	5154	1167	72	4774.99	3053	2799	121	1666	274	203	1230	181	799	205	10946	646	1246	543	1317	664	4251	1311	1805	510	215	1698	2437	1504	781	54	360	26	770
ENSG00000055208.13	2608	2702	3777	2842	1641	2387	2012	3902	2458	2382	3443	4014	3401	3481	3356	2460	2957	1972	1154	2902	2745	2309	3867	3075	3850	2571	2007	3021	2833	2289	4439	1185	1730	4443	4350	3325	2189	3693	2730	4030	2122	3010	3594	4430	3055	1485	3404	3302	5842
ENSG00000055211.8	2595	2028	3723	1535	2768	3432	4382	2226	3184	1912	2357	3527	5781	3484	2625	8513	2662	4393	2912	2379	3133	3613	4507	1999	5553	2048	1893	3018	3298	4023	2776	2153	2771	3358	2564	2821	2353	2783	4380	5227	3414	4926	4922	4374	3027	4333	2361	3095.02	6056
ENSG00000055332.12	10783	6843	12689	17351	5880	4544	6506	5432	8869	2399	6243	5424	10167	8543	4445	9143	5047	12795	7125	5958	6894	8254	6745	8422	13046	3313	3851	5701	6528	4910	8466	11982	5467	11399	6856	3021	4375	7950	9291	12045	4568	9959	14026	12891	11418	4133	7897	4247	17343
ENSG00000055483.15	2223	2733	2597	3234	1242	1567	1684	1346	3416	1480	4339	2986	1911	2722	3298	1383	3162	1692	1074	2158	1854	2218	1932	2545	1770	1539	2154	1318	1520	1327	6242	666	2481	2876	1528	1803	2774	2122	1524	1677	1254	1521	2606	2091	3070	1305	2626	2053	2295
ENSG00000055609.13	7555	14842	14027	11666	8037	7742	7340.97	9765	12309	5724	11435	11844	20423	19883.93	10907	12146	6891	9658	8690	9334	10563	12220	10829	11933	15349	8811	10895	4016	8684	6247	13084	5581	9035.9	18988	6995	9951	3828	7395	10719	17065.95	14101	13574	14109	18992.96	13450.99	6431	10651	6495.32	19528
ENSG00000055732.8	0	0	66	666	0	16	482	0	209	227	1005	447	0	0	120	17	310	6	43	0	1	520	48	0	585	214	5	7	5	0	1100	0	378	238	4	448	296	0	218	647	0	0	674	0	409	0	14	1	1255
ENSG00000055813.5	1990.12	1614.79	643.49	81	4061.86	8	19	0	377.31	0	29.93	1	162.02	1560.28	121	60.9	30	1038.46	127	855.63	2520.82	99.3	39	779.79	90.38	1	528.25	210.13	572.01	8	44.67	1908.44	84	611.13	133.12	21	8.15	1638.68	1	123	237.99	665.68	720.15	2685.29	399.61	46	270.77	173.62	284
ENSG00000055917.11	3974	7316	6764	4918	5719	3493	3841	6159	5488	2709	6402	10925	14475	13002	7476	5776	2933	7123	2097	5034	8313	6355	4628	5731	5942	6593	5295	2498	6679	2730	8180	3433	3810	6462	4930	7514	3173	5580	7775	8502	8034	11862	8972	14111	9030	2261	3899	2356	8710
ENSG00000055950.12	2768	1011	1200	1165	1735	1207	1581	1715	2196	2644	1816	1511	2153	1115	4056	1425	2781	2241	420	1638	2097	1720	1299	1325	1000	1855	841	2859	2394	1297	2517	1018	1488	1457	2890	1339	3613	2263	1691	1863	1591	2806	1444	1635	1794	1762	962	2428	1164
ENSG00000055955.11	4	9	15	102.02	0	5.33	148.55	0	0	0	19.38	29.17	13.94	10.96	12.08	95.02	0	26.78	0	0	18.07	92.99	7.98	4.48	143.21	3.31	8.03	0	34.81	44.88	10.93	15.71	13.36	47.97	0	55.8	3.63	0	75.71	32.63	7.2	12	47.11	5.51	25.43	193	40.31	18.87	109.91
ENSG00000055957.6	0	0	0	0	11	0	10	0	0	0	0	0	1	0	0	11	0	0	15	0	0	0	0	0	0	0	0	0	0	0	0	0	0	1	0	0	0	0	0	0	0	0	0	0	0	0	0	0	2
ENSG00000056050.6	644	369	626	669	588	413	793	540	914	586	579	372	1170	539	481	607	1262	1236	484	401	950	457	672	393	726	374	297	1181	753	545	804	581	571	520	1240	382	759	751	747	1571	580	1171	1053	946	1579	392	307	586	1039
ENSG00000056097.11	8208	8799	14684	7671	6936	4643	11784	8210	12627	4049	10217	12955	15180	11682	6644	11963	6631	13841	3283	5956	12274	9662	6159	5822	11033	7897	6968	9063	10866	6838	11901	5246	7722	8757	12240	11272	8327	7001	11184	10497	9757	11978	10634	13315	11542	6638	9930	9142.41	18357
ENSG00000056277.11	1076	1231	1733	653	291	451	276	1090	1191	324	614	212	751	487	711	349	482	635	319	647	511	562	523	454	994	135	791	774	395	365	941	198	785	1124	919	143	865	892	471	910	337	553	648	780	751	341	1084	302	1212
ENSG00000056291.13	0	0	31	239	7	3	1	0	0	0	304	2	0	3	213	0	140	0	0	65	39	3	0	112	0	11	0	0	0	0	285	33	0	0	0	0	168	43	0	0	1	0	0	0	0	0	2	0	4
ENSG00000056487.11	0	0	0	0	0	0	0	0	1	0	186	2	1	0	0	0	29	0	0	0	1	0	0	0	1	0	0	0	0	0	202	0	0	15	0	0	8	0	4	0	0	4	0	3	7	0	0	0	0
ENSG00000056558.6	1107	499	187	487	331	216	1746	71	220	68	1608	228	137	2737	529	494	885	247	161	444	414	630	413	409	706	159	127	569	414	95	1244	316	335	479	699	212	746	954	563	311	131	349	149	195	130	83	179	232	1257
ENSG00000056586.11	8685	12247	11605	8661	9153	3453	8633	5093	6912	3969	10478	13440	33277	18682	8368	9006	6415	14374	2126	7899	13289	5196	4919	8783	6926	8197	8792	3272	10898	6190	13632	6852	3081	7405	6344	10768	6449	7507	8134	6608	21155	22173	9581	23117	8128	4742	8365	4983	9935
ENSG00000056661.9	995	425	381	212	411	593	219	1005	364	366	1726	154	447	526	1735	181	623	245	128	563	512	200	805	1272	253	102	468	322	320	195	1995	168	268	407	498	106	462	636	184	389	398	377	207	571	234	325	187	766	324
ENSG00000056736.5	0	2	13	0	0	0	2	3	0	0	17	3	5	30	72	10	183	0	0	0	0	6	0	0	94	0	0	0	0	0	4	0	0	182	0	2	124	0	19	4	2	14	10	12	6	0	11	0	260
ENSG00000056972.14	1397	896	1438	2582	1109	2012	1286	1290	3100	4709	1941	4536	583	801	3732	2141	3026	1154	952	969	911	2342	2542	871	4912	2904	734	1271	794	1740	2606	244	3134	3937	1494	2692	2277	1888	1279	2483	477	667	1060	1174	1449	1433	2812	1018	5868
ENSG00000056998.14	4	0	202	2147	3	147	22	611	143	3	152	0	20	135	424	470	44	274	230	14	4	687	160	21	238	29	5	144	135	287	201	45	54	70	242	3	54	1	491	438	37	41	154	27	85	260	18	729	104
ENSG00000057019.11	12153.98	14462	34787	15389	2555	6647	32672	12749	128113	16291	98425	21451	7271	9384	143690	116689	194774	230678	13110	31595	29729	21619	10499	21316	7874	19772	12954	32924	50465	15273	126856	8935	38111	15700	78341	16098	135321.02	13699.88	14070	30615	3314	7806	69947	5670	107033	10575	9745	12597	17043
ENSG00000057149.10	0	0	0	0	0	0	0	0	0	7913.81	0	1915.51	0	0	0	0	7	0	0	0	0	0	0	0	0	1205.97	0	0	0	0	1	0	0	0	4	9445.74	0	0	0	0	0	0	1	0	0	0	0	0	0
ENSG00000057252.8	4012	2780	7969	24072	3237	3479	4711	2769	5856	1754	6382	2925	7531	3897	3880	7407	7352	7911	5011	3236	5032	11091	5969	2766.1	9243	2107	1362	4576	3092	3472	8509	3410	6571	8588	4265	2274	11345	4238	8642	13295	4596	6824	14056	5504	11698	3275	4100	6268	12176
ENSG00000057294.9	324	364.59	1106	3	53	724	1	81.01	55	2633	2492	8693	184	6034	3332	1184	982	68	1209	20	1303	0	999	115	0	10172.98	1374	980	513	1665	2269	1184.96	0	0	1242	7795	1887	236	4	0	830	402	14	861	2	1074	1	3223	0
ENSG00000057468.6	5	10	24	31	10	8	8	0	12	0	23	25	27	32	0	171	88	61	11	0	29	45	1	0	15	15	12	0	17	6	12	27	17	3	0	59	0	0	112	6	64	18	36	16	20	5	5	0	490
ENSG00000057593.9	0	2	0	18	0	2	0	0	0	0	38	0	1	1	6	0	6	0	0	0	0	4	0	0	0	0	0	0	1	0	29	0	10	38	0	0	0	0	4	0	0	0	0	0	0	0	9	0	2
ENSG00000057608.12	26994	33678	31939	16811	36179.97	12444	28606.94	17361	45518.99	19952	20054	23771	61752.99	30055.86	20723	31921	25711	50707	15218	18887	59227.22	29986	19689	13915	31913	27485	26111	28771	40701.79	16851	26216	20556	29542	33034	29282	16301	30982	29999.99	33963	39934	26234.99	65754	36277.94	52735.61	43629	16908	17931	20530.98	37471.99
ENSG00000057657.10	520	957	4094	11	1004	74	33	193	96	315	456	2611	250	618	14	116	184	84	51	531	550	286	121	1020	192	571	290	304	24	234	548	27	110	2405	729	829	31	955	229	554	40	451	303	257	372	11	1510	13	184
ENSG00000057663.8	3438.82	3004	4045	1577	3872	799	2712	1390	3934	3002	2521	5111	6895	5125	1418	5422	2841	5636	1436	1854	5636	3402	1164	1437	3349	4340	1850	2648	3855	1114	2680	3131	2177	3041	2775	4446	2879	3762	4156	5624	4115	6689	5308	6136	5232	1519	2449	2441	4044
ENSG00000057704.6	4052	4246	321	2642	6356	96	204	9	1003	1148	4053	3108	469	1920	1231	199	2592	31	73	3295	10216	185	122	2460	5	1200	2010	361	8	159	5017	2444	369	119	333	1868	1454	6006	158	154	883	1778	2174	6918	2659	69	33	834	21
ENSG00000057757.5	2484	1149	1228	1648	1828	1077	2219	1548	2186	2895	1419	3129	4295	2256	1547	1921	2077	3094	1095	1051	3081	2429	1522	1466.13	1644	3276	733	2095	2290	1101	1922	1181	1073	1147	2400	2754	2377	2828	1733	2726	1910	3231	2469	2677	3575	914	950	1600	2118
ENSG00000057935.9	957	1885	1790	1614	1494	1147	1343	1989	1287	881	1455	1280	3613	2351	2351	2080	1289	1767	1003	1854	2635	2488	1953	1591	1762	1246	1412	1394	2014	943	1842	1003	1281	3050	1569	1974	1436	1527	2355	3020	1785	3003	2529	3225	2116	885	1584	1565	2525
ENSG00000058056.4	3338	2616	1687	2232	3008	830	1702	1170	3123	801	989	436	15072	6502	1701	1662	1661	3805	1752	1769	2562	1984	1025	1677	2284	191	1333	2267	1650	1085	1431	994	1877	2363	2613	142	1938	3761	2065	5140	13476	11466	3294	12336	4664	450	2210	1033	3030
ENSG00000058063.11	8379	7490	10153	6886	8612	3426	9700	3701	8763	7096	4848	16893	24698	25084	5729	14483	5248	12551	3207	4876	10485	9242	5105	4781	14017	12021	6955	9089	14965	5061	6218	6068	6855	9312	7238	16294	4379	9756	11776	13895	18912	29893	16536	37651	14571	5016	6956	6995	18122
ENSG00000058085.10	3792	360	4131	43	4837	264	812	762	3362	143274	172773	242504	36	13745	9488	567	70756	909	119	22585.01	285	388	366	13935	620	321914	256	270	370	682	221720	840	790	59	23904	189929	44817	448	569	1537	702	14904	263	152	1242	585	253	876	226
ENSG00000058091.12	931	1292	4898	207	742	2611	5429	3560	4630	977	2135	400	299	560	2723	8477	1183	7905	1961	530	4281	5556	3685	749	7418	1292	672	5845	12904	1972	3015	1392	3722	5844	4955	909	919	1274	6416	11022	297	438	8570	617	9676	2300	3404	5091	8297
ENSG00000058262.5	34796	29737	41369	15401	23652	27390	35297	21711	55378	17522	41205	44949	41640	34945	33780	49383	19900	70143	7502	28160	43864	49023	38211	22413.97	41347	31742	21384	49432	53505	36493	48172	14930	22191	28400	57412	25414	30620	38033	33096	53527	32618	44431	55479	51942	52365	36010	26923	43978	49554
ENSG00000058272.11	6185	9173	16367	4396	11125	2546	14733	5071	9541	3889	5727	11171	17725	14859	4769	15439	7329	20447	6610	4443	15233	8157	4207	4977	9414	6221	5437	5765	16053	3927	8777	6459	5500	11105	7361	8373	5637	4576	11554	17448	9921	15419	19016	17433	21587	4725	8299	7718	14637
ENSG00000058335.11	12	2	8	28	0	0	0	0	0	0	31	0	97	12	19	0	106	0	0	11	0	0	0	4	0	3	0	93	0	0	90	0	0	0	0	1	137	0	0	8	47	21	11	10	5	0	0	10	0
ENSG00000058404.15	12	32	0	0	7	20	65	0	57	0	30	0	5	20	17	10	0	14	0	5	338	10	81	28	8	2	49	0	26	54	2	5	50	9	0	3	0	0	16	24	5	15	1	6	9	56	0	18	22
ENSG00000058453.12	2764	747.47	807	901.42	1971	1053	2860.94	696	942	1760.96	2189.24	919.26	2770.39	2304.27	3413.2	2079.22	2081.08	2015.5	1591.65	1951	1715.1	1234.52	1322	1533	868.03	1733.31	1010.83	1110	2664.29	496.18	3265	1078.31	921	1882.24	1114	1311.36	1850.69	1176.13	2529.32	2395.27	2326.82	2431.61	2976.85	3387.35	2074.54	948.57	1335.69	1803	1139.85
ENSG00000058600.11	3395	2095	2272	1526	2855	1368	2946	1510	3289	3063	2589	5781	5547	4101	3316	4094	2680	4981	525	1488	4947	2543	1997	1430	1398	5584	1849	2821	3945	1380	2890	1814	1935	2381	2474	4561	4328.99	2938	3205	2216	3685	4714	4000	5524	4402	1817	1507	2484	1586
ENSG00000058668.10	27683	46119	43453	14732	26971	22140	52790	10177	85469	12106	10696	12393	25293	31901	19990	45360	15210	45351	13913	29668	45464	95570	29801	26899	49666	6510	27755	26042	14508	14051	12146	6251	56005	56356	10947	17277	5587	17755	39672	102364	9368	28389	48399	41066	50844	9454	51639	17713	57100
ENSG00000058673.11	12300.52	21826.89	27620.13	13425.91	15545.12	9831.81	14383.57	16385	17557.04	7587.91	12583.03	18648.25	38096.72	23777.83	11116.83	17397.89	12519.38	18259.67	11054.08	11860.84	22889.1	16131.19	14761.58	11770.12	26225.85	9976.44	17106.81	11108.66	18937.76	12841.14	16190.66	9141.55	13892.65	26090.41	14088.59	12359.95	8279.87	13550.9	20319	23134.94	19613.55	30844.95	21738.7	33289.8	18511.27	10876.96	18501.41	11184.04	31313.8
ENSG00000058729.6	1418	1282	2535	871	1306	1061	1898	857	2010	1089	1102	2736	3165	1846	638	2576	999	4439	717	1259	2996	1414	1621	781	2366	1526	798	1436	2475	1274	1142	1345	1372	1597	2435	1141	1105	1949	2156	2705	1671	2440	3205	2482	2963	1187	1345	1260	3370
ENSG00000058799.9	963	519	1283	1314	1288	550	1288	1153	1375	1031	1750	1369	1424	1094	1667	1134	1721	1402	881	1069	1267	1260	532	898	976	914	441	1678	1607	1070	2153	621	735	957	1574	1511	1339	1147	1818	1298	1328	1241	1063	890	901	839	633	1564	1102
ENSG00000058804.10	6201	3854	4500	1961	4107	933	2747	1680	6506	3779	2797	3418	3412	3252	2358	3101	7917	10235	434	1471	6840	1382	1174	1242	2427	2611	1769	5065	2198	1277	3653	3548	4114	990	5446	1373	9799	6735	1841	5116	1923	7998	3437	7284	9533	1099	724	1349	3681
ENSG00000058866.10	95	7	9	396	7	10	58	0	89	0	30	16	35	28	18	185	121	262	5	66	6	9	0	59	712	0	5	18	94	23	14	2	23	15	76	0	37	133	25	35	0	154	86	40	335	76	5	0	890
ENSG00000059122.12	5856	2570	2509	9475	4204	2515	3778	3605	4721	4233	4831	9572	3890	3857	6795	6076	5066	6179	2473	4981	4764	8452	2911	3978.01	4345	5350	2397	4507	6437	2207	6367	2263	2148	3769	6624	9326	3463.07	4575	5776	6131	2544	4397	9421	5857	7070	2264	2791	4022	5999
ENSG00000059145.14	1313	1292	993	438	943	1652	615	1836	1273	705	818	472	1238	1727	1618	1017	2014	1439	877	1006	1616	1123	1816	1493	1037	271	803	895	940	1422	1101	333	638	1505	1102	418	1338	1404	773	1329	774	1367	1097	2101	964	1448	1016	1389	1216
ENSG00000059377.11	38	68	0	76	26	190	26	231	185	92	312	6	34	8	1116	58	1218	11	72	225	356	50	400	203	12	7	98	219	21	255	471	569	133	11	249	20	413	195	64	13	14	50	28	83	2	50	4	187	58
ENSG00000059378.8	6085.91	4246	1544	5542	4045	695	1634	647	850	834	3509	954	5027	4987	2218	1650	1891	1761	413	2428	4653	1705	843	4279	1065	516	3105	1231	1640	655	4061	3688	1008	1070	2003	648	2372	6355	1351	1100	4918	8372	1502	7760	1303	554	1894	955	1337
ENSG00000059573.4	7328	6812	15129	3744	7758	6792	15014	4416	16345	7842	4822	9027	14224	12180	10342	24539	9411	30926	2101	5527.79	15703	14694	9728	4873	10337	8008	6418	12032	34017	9216	6190	8546	6585	7553	13441	6434	9540	10317	10856	12140	12156	16728	18659	14351	12694	9907	10103	10406	11162
ENSG00000059588.5	1580	2002	1669	2531	1971	852	2416	774	2701	1526	1803	2943	3251	2648	1931	4059	2919	3837	788	2844	3265	3038	1232	2898	2204	2002	1378	2038	3021	1218	2824	1966	2301	2357	1592	1211	2462	1954	2723	4113	1829	3062	4992	3034	4763	886	1357	1645	2356
ENSG00000059691.7	2418.14	1000	967	1381	1026	773	1113	1349	1653	1687	2037	1112	1108	1525	2126	1288	1636	2273	428	853	2169	1733	881	707	1030	871	733	2300	1994	575	2430	691	1384	1365	1602	1100	2263	1957	1600	2019	801	1874	1906	1798	2462	845	717	956	1339
ENSG00000059728.6	875	875	937	779	615	768	1159	826	579	1848	2399	10795.29	1123	949	853	1197	472	1286	402	707	839	719	974	594	1079	5136	641	577	1540	786	2987	461	481	951	1302	8142	695	784	1524	830	1132	991	2546	881	1079	787	522	1047	1389
ENSG00000059758.3	17830.91	19187	5248	4835	14895	1266	5447	4694	5433	2725	5020	5627	18413	16535	2575	6954	2014	18953	1538	12697	23270	5482	1962	11315.99	4242	2775	13187	3195	6359	2884	6098	11954	4547	7683	9787	3182	3741	20435	5814	8509	15098	18274	6596	20977	9310	2825	5963	2370	5725
ENSG00000059769.15	397.04	272.95	655.4	399.73	467.08	656.54	723.11	1277.04	995.23	990.41	377.3	820.85	414.45	522.59	606.13	1569.3	926.56	1191.59	1161.3	394.78	770.86	623.83	857.59	482.29	1182.98	766.17	147.94	751.33	618.11	924.12	673.84	245.54	382.31	334.08	948.82	503.6	555.21	696.57	906.55	838.68	361.88	642.04	898.62	692.47	1012.79	745.43	333.41	1070.39	1569.31
ENSG00000059804.11	1686	2480	8690.99	3312	3782	4536	3602	11029	12268	1171.97	2094	2223.99	9901	2397.96	2375	34745.43	2214	18510.98	2548	2042	5024	7337.98	4819	1843	7461	1394	2690	7172	7433.99	6331	2985	2972	9256	3900	6156.92	1147	321	2079	12345	7287	2801	8749	14997.97	2909	14951.95	9416.99	5444.98	6538	12058
ENSG00000059915.12	0	2	90	20	11	597	17	313	37	12	128	50	12	18	352	153	63	37	30	16	10	694	601	10	53	12	10	343	24	88	154	12	54	34	534	18	31	0	298	64	24	12	416	10	210	79	14	365	92
ENSG00000060069.12	3660	2745	2157	2302	4263	1370	2562	2463	3477	3089	3333	4061	5246	4542	3148	3448	2075	5571	1036	2638	5813	3627	2103	2616	1945	3642	2593	2024	4105	1852	3917	1856	1839	2360	3205	3989	2714	2974	3115	3302	4372	5325	3935	6050	4113	1683	2514	2602	1864
ENSG00000060138.8	21141	11606	4696	3952	6296	8870	4265	5769	14519	20222	13305	9666	11121	7759	13937	3986	13058	10200	5735	13821.02	13568	6644	12411	12202	7871	6435	10803	6204	4711	7147	15540	6943	8891	6079	11280	6900	9831	13353	6156	5440	9484	12567	5137	12066	3858	7982	5902	13216.27	8644
ENSG00000060140.4	929	784	76	1	482	0	34	0	52	125	93	115	703	514	27	223	496	519	0	116	1619	10	0	96	12	62	734	33	19	0	111	236	0	98	33	344	242	714	6	0	322	1046	23	634	33	0	146	0	12
ENSG00000060237.12	14202	17456	14491	11935	8928	10666	8872	11002	17713	11911	15596	15246	22978	21984	18773	9081	9570	7719	5414	14872.01	8027	15984	12979	16292	22288	6950	13270	9016	8839	9404	16916	3149	11962	15528	10876	11248	7427	14980	8893	18148	14076	19410	13570	31393	12573	7059	12363	10055	25937
ENSG00000060303.5	0	0	0	0	0	0	0	0	0	0	0	0	0	0	0	0	0	0	0	0	0	0	0	0	0	0	0	0	0	0	0	0	0	0	0	0	0	0	0	0	0	0	0	0	0	0	0	0	0
ENSG00000060339.9	4094	4947	4459	3129	2664	2150	2680	3094	4035	2542	5105	3174	5239	2978	3036	1961	5309	4260	3470	3109	5036	2341	2740	3218	3691	1738	2971	3242	3029	2227	6109	1588	3471	3262	3184	2995	5601	3748	2302	3402	2104	4700	2433	4914	3865	2169	2312	2773	4968
ENSG00000060491.12	6128	2264	2600	3414	3857	2740	2628	3089	4102	3199	3831	1276	2968	3692	4070	3168	5005	4446	1985	3894	4487	4822	4166	4042	2175	1355	1873	3314	3009	2494	5462	3597	2534	3750	4877	1507	5046	4729	3074	3109	2518	3217	4939	4988	4711	3314	3090	4444	3011
ENSG00000060558.3	34	0	8	111	5	0	1	2	0	7119	90	7377	6	3	0	6	89	4	0	29	5	6	0	3	1	6021	4	28	6	0	69	5	0	0	287	7872	82	0	0	5	0	8	10	9	12	0	0	0	0
ENSG00000060566.9	0	0	0	0	0	48	1	0	0	0	0	0	0	0	0	0	0	0	0	0	0	0	1	0	0	0	0	0	0	0	0	0	0	0	0	0	0	0	0	0	0	0	6	0	0	0	0	0	0
ENSG00000060642.6	473	302	905	1093	464	477	754	1274	601	445	380	1406	738	403	1123	1546	556	722	250	236	504	1569	715	311	720	910	329	1004	992	426	715	308	593	1014	796	1425	526	386	1219	1019	596	800	1254	605	980	689	613	446	1001
ENSG00000060656.15	52	1006	989	3283	605	3447	1623	3275	2435	10637	10125	7667	345	843	6697	1793	3856	645	596	5327	1823	3424	4192	1875	1455	7211	258	1268	1246	2778	11989	186	1395	4787	4907	5293	4156	313	3149	1218	287	703	2723	262	4148	2369	3807	4018	1860
ENSG00000060688.8	5694	4693	4632	2429	7369	1102	4533	1786	6791	3126	2615	7817	9343	4863	2565	3984	3406	9986	1071	2213	12057	3274	1372	1679	2805	6631	3063	4460	7307	2542	3932	4444	3668	2608	4320	6509	6352	6752	4709	4907	5340	12346	5145	6266	8888	2742	1910	2635	3534
ENSG00000060709.9	0	0	0	1	0	3	0	0	0	0	75	0	0	0	68	0	49	0	22	0	1	0	27	0	36	0	0	0	1	0	84	0	0	8	0	0	26	0	6	0	0	0	17	0	5	0	3	17	55
ENSG00000060718.14	0	4	1861	6609	6	5	1	571	3969	37	63	3	0	27	2871	2771	1290	1514	948	0	7	249	17	21	14814	20	3	375	124	0	103	150	28	2941	1772	3	857	0	68	640	2	3	35981	8	18740	14	15089	1016	5864
ENSG00000060749.10	4601	5552	5666	4000	3293	3770	3597	5311	7607	3296	5985	5990	8856	6448	5132	5044	4568	5948	1592	4496	5429	4693	5256	4852	7316	2758	3339	4459	4012	3989	6702	2280	5450	5686	7097	3563	4364	5484	5103	7890	2653	6807	6024	10783	8546	2422	3690	3340	8995
ENSG00000060762.14	916	282	506	632	650	457	958	320	1082	697	599	1029	831	250	603	603	581	1367	157	542	894	605	493	303	780	1053	166	735	1046	630	537	421	369	496	902	876	533	924	455	921	611	837	521	543	660	609	370	1062	838
ENSG00000060971.13	2611	629	804	1014	2671	1898	2354	1354	856	4499	2140	2945	3047	2394	3962	1124	2026	3656	859	1694	3465	1647	2318	1550	1922	2753	617	1730	3969	1609	3083	1267	667	1497	2037	3916	2907.93	2813	1470	2105	2036	3707	1779	1682	2063	1579	681	2464	1955
ENSG00000060982.10	24277.99	37930	34117	223	11241	7568	36532	14218	53932	4283	21052	9260	72885	36191	15037	47144	5424	57004	11898	22732	68686	45469	12205	14881	32647	7437	25707	28426	28356	30436	28920	34752	26689	798	37998	3904	14578	27172.01	29604	65559	24723	106793	82177	51371	68342	21136	2141	26240.87	33026
ENSG00000061273.13	11662	7798	4373	671	6807	6041	3072	4882	5862	4886	7148	967	5804	7821	13348	3632	11155	5466	2711	8644	7363	5901	7393	11454	5071	845	8122	6498	5311	6685	7583	2740	4469	7377	6095	1122	9224.91	10845	2880	4903	4620	6272	4818	10227	3474	9454	6609	12923	4508
ENSG00000061337.11	0	1	154	37303	39	324	1475	319	700	325	861	7	4	2	1648	320	1070	2240	72	423	2	542	320	301	604	1	0	554	143	189	1095	7	46	228	1030	1	1719	134	963	466	0	0	50	1	102	351	612	195	933
ENSG00000061455.10	32	6	62	14	10	48	915	2737	34	18	17	4	25	5	28	94	0	12	123	0	5	2267	54	3	230	0	6	24	430	13	3	17	32	760	569	2	6	12	4069	6080	6	4	22	11	7	54	26	244	233
ENSG00000061492.7	0	0	0	0	0	0	0	0	0	0	0	0	0	0	0	0	0	0	0	0	0	0	0	0	0	0	3	0	0	0	0	0	0	0	0	0	0	0	0	0	0	0	0	0	0	0	0	0	0
ENSG00000061656.5	75	111	126	46	237	164	111	518	331	30	141	121	544	290	338	851	328	495	57	126	211	231	130	108	142	134	240	176	614	506	72	133	206	96	582	244	67	19	208	329	524	539	324	264	147	734	46	267	216
ENSG00000061676.10	18869	25898	27413	13615	25723	7970	23672	9144	26764	12998	19076	54523	54527	38312	16337	35647	14855	34825	7516	15081	35283	22071	11689	12819	26812	37310	16701	16076	28922	12701	25221	14460	15572	20189	20784	42218	13258	23902	25758	30691	31412	48455	40080	57941	40469	10919	15999	17269	34396
ENSG00000061794.8	3726	2091	2754	1733	2501	1327	2378	2401	3589	3062	3028	4694	3847	2410	2336	2416	4084	4064	1979	1917	3738	2014	2032	1361	2807	4053	1268	3068	3322	1737	4292	1746	2787	1856	3771	3640	4335	3325	3206	3478	2312	4253	3442	3385	3558	2006	1108	2836.88	3069
ENSG00000061918.8	31	364	170	163	112	528	625	1672	77	418	250	335	2051	764	2961	368	671	243	282	25	141	4683	590	125	240	233	327	333	56	282	200	396	387	434	991	508	292	568	4849	6565	181	1941	484	1030	463	350	364	306	243
ENSG00000061936.5	2488	2973	2887	2376	2071	1117	2494	1954	3312	2053	3036	2583	3556	3205	2046	2225	2830	2990	1835	1518	3119	2462	1666	2122	3139	2164	2011	1513	2957	1176	3456	1406	2434	3738	1926	2515	2492	1788	2585	3364	2126	2759	3550	2393	4355	1639	2514	1600	3370
ENSG00000061938.12	2821	1691	809	1094	1940	621	753	856	1160	2038	1465	751	2173	2283	1939	813	1608	1585	290	2046	1685	991	944	2774	791	668	1811	1094	1511	961	1684	443	554	2158	1080	539	1380	1426	797	910	1889	2309	1203	1831	1380	751	1454	1295	817
ENSG00000061987.10	2826	4613	8584	4546	3883	3720	6705	4229	6555	2590	3203	5854	9745	8525	4008	8984	2765	9341	5867	2547	5381	7817	5536	3104	9334	3678	3548	4336	9366	4320	3973	2907	4970	9636	4340	3675	2538	4137	6789	13883	5014	7742	11184	7394	10285	4362	6548	5002	10899
ENSG00000062038.9	1	1	47	20208	1	1	2	225	2	56238	15684	91658	0	1	2962	161	16262	40	0	290	5	14	5	33	18	58137	0	88	3	3	20885	0	0	38	2846	56203	10328	0	17	138	1	3	30	16	16	0	73	64	6
ENSG00000062096.10	0	0	0	0	0	0	0	0	0	0	0	0	0	0	0	0	0	0	0	0	0	0	0	0	0	0	0	0	1	0	0	0	0	0	0	2	0	0	0	0	0	0	0	0	3	0	0	0	1
ENSG00000062194.11	3361.98	4517	6444	5717	5194	2248	4986	4236	5207	2649	4182	11864	11291	6262	2227	7921	4102	8409	4714	2368	7440	4774	2628	2187	4986	7450	2608	4142	6350	2125	5626	5362	3396	5187	4153	7682	3975	3902	8440	8164	5840	8138	8346	8354	8821	3310	3537	3648	7857
ENSG00000062282.10	40	86	26	97	69	487	48	44	2269	1557	199	1144	41	251	62	1127	154	195	5	91	415	1241	951	46	164	231	91	37	77	356	242	52	1330	22	184	1547	97	137	216	626	58	219	200	122	130	232	9	63	204
ENSG00000062370.12	294	622	968	390	756	366	920	419	827	190	378	329	1857	1277	378	1355	416	1228	359	331	1215.77	895	737	293	982	624	464	328	1298	411	467	659	442	950	359	948	231	254	1385	1392	906	1180	1097.86	1212	1098	825	557	352	1397
ENSG00000062485.14	16292.98	12640.15	7961.74	7419.21	5812.46	4777	3769.37	9113.99	13073.63	9618	9219	5254.44	9009.77	10642.73	12437.94	3443.98	13333	8919.23	1645.88	10242.18	9622.14	4902.73	6892	7372.67	7405.65	4465.92	9376.8	11356.85	6445.86	5247	11468.98	3143.73	8532.53	8722.9	12629	4375.09	15724.45	18705.86	3730.18	7226.97	4384.72	12544.6	5010.4	16786.91	8320.32	6041	5303.8	6994	7614.38
ENSG00000062524.11	11	6	60	15	6	0	9	0	12	4	882	4	12	6	173	3	18	25	0	16	6	21	0	43	8	2	0	122	41	15	654	0	0	43	19	6	6	53	12	39	2	6	42	7	51	0	8	0	5
ENSG00000062582.9	2474	965	1730	991	1549	1004	992.83	1968	1965	3258	1879	1371.96	1850.17	958.51	2649	1405	3912	1695	1172	1136	1893	1664	1452	677	1171	1891.04	701	2238	2277.4	1083	2784	710	1438	1624.56	3221	1585.25	2591	2379	1589	2350	1187.99	2676.58	2191.24	1198	1873	1298	921	2163	1409
ENSG00000062598.13	2868	2308	3265	4425	1954	2072	2124	2618	3524	1868	4075	1498	2959	2962	2862	2658	2190	3902	1479	2447	2754	3348	2282	2040	3306	1073	1540	3403	2920	2160	4563	1124	2186	4001	3941	1391	2209	3573	3095	3767	2590	2673	3080	3312	2702	2166	3572	3811	3690
ENSG00000062650.13	5582	7395	10041	5305	7895	2793	7489	5033	7029	3832	5615	13030	15047	10508	4344	10179	6420	13983	8046	3832.33	12947	7463	4125	3835	7191	7658	4958	5748	9854	3280	7362	6589	5101	7629	6053	10421	6247	5507	8472	10789	7990	12490	11362	14673	14194	3746	5734	4812	10319
ENSG00000062716.6	9928	19792	58767	13916	7912	6990	15443	7061	26962	6311	15022	13490	13562	20774	13206	23578	26141	20664	8937	10228	13558	9642	10066	13283.97	34406	10230	15001	8746	29743	9960	21137	15530	14429	23852	14020	11068	11489	14109.73	21835	17782	10811	14211	29642	10416	16705	13891	16483	11404	51431
ENSG00000062725.5	4777	6183	13312	7673	7790	3018	6826	5444	6947	2253	3902	4885	14195	7392	5101	10818	4096	10111	4955	4500	9057	11876	3773	3856	10871	3487	4014	6923	8887	4003	5931	6516	5222	10747	4832	4112	3403	7120	12266	16607	6705	14036	11360	11459	9659	4565	7644	7055.99	13467
ENSG00000062822.8	6405	2627	1904	2486	6280.9	662	2475	2204	4603	4616	2245	2262.27	3065	6853.64	3233.12	1786	8100	6229	478	2066	7943.85	1693	1034	1847	703	2385	2339	3538	3514	1094	3085	3521	3071	1226	4433	1548	9547	6079	1455.43	5030	2906.1	7744.72	3326	9723	8012	1827	830	1403.08	973
ENSG00000063015.15	0	0	0	0	0	0	0	0	7	0	0	0	0	0	0	0	0	0	0	0	0	0	0	0	0	0	0	0	0	0	0	0	0	0	0	0	0	0	0	0	3	0	0	0	0	0	0	0	0
ENSG00000063046.13	34610.74	67912.05	69927.83	24675.66	103909.16	36847.21	105744.75	72554.71	82235.65	42804.17	38627.64	145802.12	265365.26	97119.42	40239.62	175888.54	49147.56	125354.46	88502.01	25229.46	155756.33	106934.39	54107.44	16371.13	87217.54	202934.38	60295.6	47228.37	185785.24	42031.78	58147.07	38811.77	79446.13	95056.04	59220.53	126496.67	38486.23	36001.71	178103.95	111082.85	99659.98	160131.12	166911.52	135169.98	108036.55	49743.45	56190.76	58605.13	99722.31
ENSG00000063127.11	13	30	1	46	9	11	19	5	0	0	32	2	71	37	16	39	3	10	0	95	56	12	1	72	2	2	68	0	11	68	20	9	4	30	1	3	6	0	7	0	29	47	6	32	3	0	5	0	12
ENSG00000063169.6	295	408	266	324	232	323	139	464	429	171	388	107	246	398	569	171	362	176	94	406	290	337	548	928	170	134	289	166	256	141	346	110	179	381	314	125	147	137	160	483	181	291	425	656	339	43	440	293	202
ENSG00000063176.11	1168	743	429	797	488	583	475	833	921	975	1555	516	378	500	1317	477	1078	704	295	550	556	984	1006	832	450	237	410	951	484	474	1615	248	540	872	898	250	1030	603	429	1116	489	573	669	1086	670	586	724	1291	554
ENSG00000063177.8	33058	20652	15608	10142	36950	19218	22572	39506	53833	52655	33622	36300	49355	18644	45006	30099	42680.61	36958	12891	21901.9	55798	23258	25747	14508.01	14155	70056	15582	34944	53579	22954	47518	24449	24488	19256	48540	38909	34126.98	28623	29254	31740	34474	57788	33699	23004	30020	30819	14017	41156	18369
ENSG00000063180.4	36	60	70	65	75	97	58	200	39	139	84	155	380	175	741	175	62	48	431	117	100	137	69	114	36	141	75	0	104	47	68	40	21	68	98	264	14	14	159	112	463	262	129	118	31	168	58	156	81
ENSG00000063241.3	2282	1343	1620	1668	1701	1414	1642	875	3886	2027	1485	1407	2756	1394	4827	1469	1681	2270	357	1704	3673	1449	2331	969	1150	1031	1209	3644	4192	2008	1299	822	2163	1764	4048	1133	2373	1667	1267	1747	2582	4065	2197	2758	1874	2860	1713	2922	1526
ENSG00000063244.8	12933	5791	5607	4425	6488	3835	5635	6026	10178	11478	7922	6917	6805	7027	8342	3539	8047	10497	1980	5623	10773	5953	5401	5344	3413	7481	4165	11502	8233	5656	10460	4386	4347	4357	10062	6047	13127.94	11307	4635	6829	4647	9592	7187	10006	10578	5214	3545	7507	4147
ENSG00000063245.10	7905	3867	3027	3279	4318	5108	3411	8219	7548	8239	8525	6975	7029	9447	13410	2930	7679.04	5443	1269	7543	6463	7551	6107	7480	2966	5191	4520	9440	5501	7298	8089	1689	4082	4885	9769	6447	8246.02	8188	3856	9477	4655	6638	6346	15900	8019	7338	3521	9538	3418
ENSG00000063322.9	3104	1559	2182	1923	1237	1745	1727	2914	2674	1606	2746	1269	1766	1125	5438	1526	2344	2414	918	1851	1876	3134	2420	1551	2712	760	1511	2569	1659	1349	3088	680	1791	3966	2723	918	2980	2222	1907	2523	1521	2291	1832	2130	1620	1685	2230	2486	3158
ENSG00000063438.12	2191	1180	2362	3030	1825	306	2849	4259	1201	49	580	145	532	448.92	112	3545	65	3198	427	2330	1905	8847	271	1848.99	2052.99	84	450	98	1553.99	985	324	237	2000	15168	1162	27.83	96	1305	1009	7394	237	1055	3519.93	1116	3805	1332	7399	1602	2485.99
ENSG00000063515.2	0	0	0	0	0	0	0	0	0	6	0	0	0	0	0	0	0	0	0	0	0	0	0	0	0	0	0	0	0	0	0	0	0	0	0	0	0	0	0	0	0	0	0	0	0	0	0	0	0
ENSG00000063587.12	1145	1554	2701	694	895	2065	1452	2559	1819	959	2568	1462	1776	1364	2918	2220	1186	2424	693	1306	1396	2135	2056	1245	2001	851	1306	1155	2202	1834	2653	475	1569	2361	2309	856	1224	1076	1643	2168	1303	1676	2630	2046	2408	2520	3056	2559	2343
ENSG00000063601.12	1830	1730	2892	1781	1407	1050	1448	1349	2103	2325	2336	1776	2596	2395	2240	2669	2242	5122	610	932	3181	3417	948	1289	1632	1603	1440	1571	4472	589	3073	1257	1519	1963	2912	1974	2355	2268	2995	3386	1733	3908	3514	2546	4231	914	1831	1348	2177
ENSG00000063660.4	4132	1835	8604	1826	1100	19971	8131	11398	15244	26010	8273	9095	2342	1756	22300	8089	5963	7226	3526	15735	3582	32664	22331	10192.84	5336	7800	1484	14451	8490	22106	8799	721	8515	8440	16735	12515	3563	3101.21	8820	20615	358	3191	14643	1688	10204	16718	6609	18640.02	7353
ENSG00000063761.11	581	172	343	692	118	152	193	270	233	177	387	227	365	234	759	267	220	242	188	302	202	336	232	359	216	214	208	618	304	184	633	65	292	253	387	181	381	516	281	318	161	293	409	308	323	350	223	314	285
ENSG00000063854.8	2440	872	558	1055	2193	358	2057	400	840	1631	1789	2334	1491	2154	1956	1663	2793	2101	153	2321	2723	659	271	1410	411	2121	725	1210	2118	1480	1965	815	378	469	975	2195	2286	1642	877	704	2338	2443	1698	2176	1296	1089	362	1291	383
ENSG00000063978.11	5322	5000	4187	3398	3196	1930	2558	3192	6603	3150	5395	4326	4625	3669	6120	3080	5880	4512	3677	3812	5125	3882	3162	3226	3212	2860	3398	3584	3778	4087	6628	1795	3262	3471	6350	3793	5161	5534	2924	3374	2953	4838	3783	6232	3729	3916	3796	5143	3978
ENSG00000064012.17	1977	433	1647	831	1309	741	1483	1100	2456	491	601	2054	2041	853	600	2177	771	2738	795	854	1150	1668	1000	377	958	1683	253	1246	1475	369	987	927	1141	1354	1222	1531	712	1619	2969	3420	1004	1644	2569	1370	2763	693	1534	650	2084
ENSG00000064042.13	3122	4778	612	145	12693	361	5651	1617	1200	243	431	91	8684	5807	1206	4023	3101	3246	76	5417	4582	128	589	7505	3941	1188	3279	15	18758	1910	605	1273	118	95	342	868	1548	1064	1241	132	3435	6204	329	8812	541	1402	179	1184	5380
ENSG00000064102.10	2843	2710	3689	2316	2014	1301	2135	1475	8093	3352	1143	4978	4022	2115	1339	4102	2445	7836	420	1495	5847	2184	1987	1484	1914	1642	1868	2977	3591	1762	1764	2399	3272	1427	3221	2012	2737	4697	3237	2925	1914	4181	4169	3780	4633	1460	1149	2310	3011
ENSG00000064115.6	5824	4609	5470	10743	5237	925	7307	2132	3831	8791	3508	26600	7231	9811	3920	11044	4032	8412	1028	4071	7669	6081	1205	2658	3282	26860	3112	4595	6788	1598	4620	4246	3096	3402	5450	19192	3684	5325	5384	6303	5216	11481	7362	8482	5291	1240	2317	1839	3914
ENSG00000064195.7	2	0	0	0	0	94	21	0	0	40	41	27	0	0	0	0	0	4	0	0	1	0	36	0	460	0	0	0	0	0	4	0	5	0	0	14	1	0	0	0	0	0	0	0	0	0	0	1	763
ENSG00000064199.2	592	196	388	236	174	43	479	369	484	479	393	80	243	138	183	269	945	489	100	337	289	253	65	164	579	69	106	1387	388	229	626	142	339	321	640	168	614	396	348	934	126	245	456	262	826	144	141	245	827
ENSG00000064201.11	0	0	6	6	0	0	12	26	0	0	0	0	0	0	0	0	0	0	18	0	0	16	0	0	45	0	0	6	1	0	13	0	8	96	0	0	0	0	16	6	0	0	22	0	4	0	98	30	100
ENSG00000064205.6	0	0	91	28	0	760	23	163	4163	12	0	0	1	0	12	200	0	3	1072	0	3	1009	864	0	3115	0	3	0	108	145	0	0	5242	3073	0	15	7	0	1131	380	0	1	541	0	77	183	1648	100	1006
ENSG00000064218.4	0	0	0	0	0	0	0	0	0	0	19	1	0	1	858	0	23	0	0	65	0	0	0	20	0	0	0	0	0	0	18	0	0	0	0	1	102	0	0	0	0	0	0	0	0	0	0	0	0
ENSG00000064225.8	1290	227	191	2399	347	573	254	119	62	73	47	97	7607.1	1012.63	204	1010	137	493	94	361	1814.74	46	647	502	85.06	171	76	45	473.12	486	138	1184	27	16	109	239.11	86	42	154	62	1579.16	599	780	1097.55	203.05	600	20	427	223
ENSG00000064270.8	0	0	0	0	4	0	0	0	0	1263	1614	2866	0	0	8	0	161	0	0	7	1	0	0	0	0	2993	0	0	0	0	2170	0	0	0	7	20345	167	0	0	0	3	0	8	0	0	0	0	0	1
ENSG00000064300.4	0	2	6	167	1	763	19	17	721	382	1	338	0	2	24	40	0	16	159	0	4	370	996	0	8	64	2	2	107	73	5	8	2	114	40	546	18	0	5	52	5	1	21	1	16	281	10	1593	10
ENSG00000064309.10	207	500	270	5379	157	2312	1412	1881	1630	201	1546	337	620	1231	1516	1470	514	763	3755	621	217	2868	3092	788	6641	357	330	240	731	3174	2088	127	5243	19822	380	534	495	267	2133	1352	986	710	1853	707	704	3534	34610	12553	6501
ENSG00000064313.7	4866	4968	7409	3252	5292	1689	4248	2286	5106	2515	3489	5307	8102	5594	2920	4759	3364	6015	2047	2752	6941	4728	1903	2032	5497	2907	3041	4756	5868	2466	4712	2808	3650	4873	3847	3715	3793	5142	5681	6524	4366	8175	5519	6873	7110	2765	3530	2783	6882
ENSG00000064393.11	7801	9547	3328	10427	4557	23158	4593	17482	30893	5705	20624	5875	13190	7896	110259	5638	24063	4641	4598	17328.97	7444	7202	30538	19047	5379	3164	7803	2992	3560	20630	24076	2528	12046	3244	8444	4815	21642	7869	5944	4614	7684	6697	4871	17537	2485	9264	4415	8840	7875
ENSG00000064419.9	7100	6657	7139	5981	7213	2178	7074	3628	8486	5604	5507	11126	11931	9333	7557	10425	7301	15202	4021	4301	14473	9917	3163	3793	5125	8449	4558	6181	14906	3340	7078	4883	5520	7453	6211	10540	7180	10278.87	8538	12075	7077	14632	11729	13785	14252	2569	5999	2849	7524
ENSG00000064489.17	85.3	177.02	120.78	247.64	246.38	151.18	203.34	277.37	464.93	59.23	350.88	79.68	259.78	325.41	406.05	257.3	367.81	421.69	8.06	75.62	516.14	172.44	57.57	213.53	116.91	99.22	147.52	113.63	433.62	239.72	170.13	11.14	257.7	145.76	285.05	203.12	558.21	276.9	152.73	356.52	325.64	454.34	174.61	240.7	207.45	0	44.77	352.25	140.09
ENSG00000064490.9	2228	1844	1404	1320	2614	814	1160	2143	2251	2173	2836	1569	3499	2060	4267	1245	3248	1618	941	2709	3577	1890	815	1729	775	1582	1820	1973	2665	1176	3414	1304	1284	1391	3496	2623	2578	2218	2036	2111	2383	4164	1707	2620	1448	1493	777	1616	986
ENSG00000064545.10	1218	557	870	917	1113	1008	866	2256	1721	2092	1909	1787	1337	1447	3716	1451	1729	1323	188	975	1467	2451	1353	714	511	1178	685	1989	1673	1481	1553	770	1140	646	2709	1347	1559	1307	1416	1264	1042	1320	1587	1769	1161	1356	537	1398	661
ENSG00000064547.9	67	26	41	175	11	28	7	280	32	548	1420	278	41	48	1209	32	1880	29	9	148	39	121	98	158	15	247	32	154	43	26	1194	10	51	72	29	342	891	32	59	42	26	38	56	24	34	137	51	92	67
ENSG00000064601.12	8523	2192	2002	2998	1985	5492	4391	3851	3150	1476	7447	917	3989	4014	14249	3812	2497	1944	960	7746	2508	11124	6937	7816.99	5550	692	2262	4621	4140	5592	7681	806	2678	4583	6240	948	3405	5119	5137	6309	3675	2757	3775	3497	2400	6175	3132	10675.94	5957
ENSG00000064607.12	3101	4818	8255	5875	3137	1969	4559	4607	6327	2251	4035	3645	3889	5555	4012	5839	4039	6117	1499	3173	4852	5486	1815	3962	4521	3546	2953	2972	6339	2408	4668	2449	4249	4753	3586	3317	3768	3236	4784	7206	3232	3823	8183	4191	8869	2150	3885	2440	5318
ENSG00000064651.9	15450	26677	7260	11744	14598	2145	7785	1867	6359	2531	3146	6754	11895	26571	3617	13585	3781	22866	2357	14748	21219	6217	3020	16482	9146	3427	12007	3108	15341	3484	4640	3658	3538	4005	3508	4276	3511	5444	4407	5346	4157	18803	6845	9402	8375	2533	2468	3105	8585
ENSG00000064652.6	321	279	804	868	272	219	657	416	718	413	2261	2905	523	284	798	904	1093	911	244	485	502	490	387	323	1139	1949	249	993	1221	486	2396	195	444	615	943	2804	1276	377	854	1066	214	437	1200	475	861	666	487	984	1263
ENSG00000064655.14	0	0	0	0	0	85	89	9	5	1099	0	320	0	0	43	30	0	20	22	0	1	135	35	0	42	652	0	121	15	217	0	0	34	20	127	828	0	0	126	42	0	0	143	0	182	280	61	303	165
ENSG00000064666.10	14435	13008	29974	1233	10696	6500	4094	14514	10900	13564	16974	10398	6162	12548	46168	13085	12176	13218	2744	14655	19711	20521	9261	11926	13523	9032	13119	20103	31262	9342	21484	4074	7601	26081	32298	6550	19550.04	16608	9533	12958	5420	13500	14621	17866	10589	17465	36604	30298	17939
ENSG00000064687.8	890	624	1080	1264	1171	333	421	407	479	1872	2096	2123	481	1117	6762	842	1686	740	812	1387	670	1107	317	982	379	723	585	451	1531	516	2288	295	470	1215	544	1516	540	220	301	676	483	902	471	1713	440	494	890	564	553
ENSG00000064692.14	784	2111	1080	0	2953	9	66	747	0	4	245	11	3744	5243	547	74	163	19	18	1612	1717	32	48	2308	61	10	947	1782	26	48	407	479	9	287	358	1	69	25	426	3	13784	1912	5359	3174	2117	1	51	139	124
ENSG00000064703.7	2641	3123	3647	2017	2348	817	1738	1263	3560	2027	2387	2491	4596	3969	1737	2080	2795	5045	964	1896	4444	1203	1467	1652	1721	1882	2273	1611	2212	2336	2872	2121	1567	1407	2822	1360	2696	3875	1982	1697	2518	3904	1787	4479	3114	2094	1417	2098	2180
ENSG00000064726.5	11986	9573	8891	7496	9450	4182	10817	6313	14939	5760	8334	7298	20174	11081	8787	12266	5665	14284	3695	9645.77	13402	11414	5548	6279	8065	7790	6973	8906	11287	5656	10290	6250	6931	7963	9348	4706	6869	11037	11207	14815	12601	20028	13660	18110	14558	6017	5190	10699	12609
ENSG00000064763.6	3933	4691	387	1312	2807	321	1935	257	2256	475	1081	56	10459	6245	1269	1554	1673	2439	137	3238	6659	772	275	3077	1099	155	4533	1002	245	306	1186	2410	2042	1243	1475	152	2466	3955	497	1341	5984	12693	1052	6880	2274	664	616	140	1349
ENSG00000064787.8	0	0	3	0	0	3	2	1	208	55	2	3	1	0	12	14	3	10	72	0	6	8	0	0	0	0	0	0	0	0	7	0	21	258	0	102	50	0	4	7	0	1	6	0	5	0	11	0	1
ENSG00000064835.6	0	1	0	0	0	0	0	0	0	0	0	0	0	0	0	0	0	0	0	0	0	0	0	0	0	0	0	0	0	0	0	0	0	0	0	0	0	0	0	0	0	0	0	0	0	0	0	0	0
ENSG00000064886.9	0	0	0	60	0	2502	46	4	332	0	73	3	0	1	0	1093	0	93	113	0	0	468	3535	0	3017	0	0	6	28	1496	58	0	231	30	0	6	0	0	529	114	0	0	10	0	7	135	2	249	5643
ENSG00000064932.11	7227	4567	7835	6691	5120	4086	7680	7381	8517	5994	7577	3441	3460	8644	14745	6500	9901.99	6647	977	6190	6510	7985	5356	7360	10062	2275	3922	5300	8044	8865	8623	2635	5202	6671	6086	2822	9591	5208	7432	5969	4775	4218	7263	9776	5763	6474	10278	8128	10318
ENSG00000064933.12	1094	1084	2522	1062	1437	539	1355	1254	1871	1027	1178	2645	2641	3956	687	2906	1585	2781	1015	849	2243	2010	806	1050	1462	1583	687	1137	1784	480	1566	1311	1173	1612	1210	1713	1259	1296	3154	2602	1947	2128	3398	2336	2397	500	1111	669	2108
ENSG00000064961.14	6805	2846	2902	34287	5288	2729	4537	4162	3565	5312	3053	2760	5542	3060	7833	3580	6203	4466	2589	4440	6158	3680	3598	3290	2146	1816	3058	6979	5073	2763	4020	2660	3252	4680	5867	2302	5766	3888	2728	5137	3426	5432	4644	5336	4000	3223	2856	4425	3031
ENSG00000064989.8	19756	30867	276	14	38593	1465	2502	1832	420	62	254	187	86447	33695	335	1465	8	1856	328	10590	35944	160	2009	9205	9	150	19625	730	5845	2146	203	23445	120	299	1127	267	75	12919	362	673	42924	85816	244	61117	359	2415	246	1159	115
ENSG00000064995.12	1828	1114	1047	745	1614	288	799	1423	929	1227	933	1627	2859	1814	1247	1013	1112	1795	456	805	2670	596	609	847	609	1543	934	1105	1442	614	1446	1368	601	679	1179	1389	1411	1787	1031	1223	1749	2872	1046	2223	1076	1165	378	901	1111
ENSG00000064999.12	3540	3350	2339	1784	5732	1015	1251	2718	2362	3563	3336	2823	5717	10417	3863	2159	4176	2355	768	3021	3259	2559	1293	2859	1153	1897	3352	1335	2169	1409	4873	1154	1057	2584	2022	1937	2802	2813	1312	2675	9718	9172	2348	20445	1947	845	1742	1582	1762
ENSG00000065000.11	19317	13183	15137	12277	12522	8215	14419	7360	20813	12158	23263	13665	13673	17795	21019	14464	20966	24136	4605	14661	20053	22579	10031	15533	9854	10332	13439	14299	18440	10459	28583	5041	12902	11592	14693	11090	16400	14178	13280	18194	10515	15194	24005	25204	18353	12014	12350	17223	11279
ENSG00000065029.10	1111	1095	940	1139	1868	815	1739	940	1509	822	1343	391	2795	2423	2270	1043	920	1578	218	1104	2505	1593	766	867	861	399	1063	886	2017	827	1614	565	1100	1760	721	627	1200	1085	795	1832	2066	2653	1471	2821	1889	832	1265	1163	918
ENSG00000065054.9	9305.11	1225	1730	120	3029	1113	7044	2781	279	993	1613	467	2814	2275	3525	812	1254	2216	328	1568	4099	2475	1357	2403.15	787	673	1935	2157	2834	3207	1288	1013	151	1354	2688	825	1804	6660	768	1306	2614	4092	809	4075	493	4139	762	2566	1563
ENSG00000065057.3	1446	358	482	404	1596	298	1233	620	474	841	878	546	961	567	1531	642	1442	1072	180	528	1642	570	297	370	338	1073	424	621	1100	320	1216	1159	577	536	920	385	1791	795	882	896	547	1535	884	940	950	483	349	631.99	392
ENSG00000065060.12	2653	2669	3655	3139	1557	918	1486	586	2546	1173	4925	4111	5510	6354	5212	974	2241	1933	594	1324.17	2422	1433	1269	1660	2194	2850	2544	2084	3267	955	6110	1421	1347	1677	1699	2744	2931	2463	2163	1271	6030	5472	3141	8542	1958	871	2204	2072	3896
ENSG00000065135.7	12749	11364	12336	5647	14396	3411	12828	4850	15687	8044	7961	16706	19160	15913	5387	15544	12141	25467	3416	6608	26540	11051	4448	4754	11944	17191	6570	12540	17056	6053	11016	11140	9737	9478	12118	21191	13404	13519	10831	22299	9511	26742	15771	22829	25810	7702	6968	7385	13803
ENSG00000065150.14	22223	18524	30357	5325	17502	9186	22851	14141	48240	13723	18503	22986	33119	23837	17450	42580	18463	62574	15033	11249	28575	25657	12391	7878.01	23892	16686	10093	30056	26989	19803	24709	10356	30943	35488	26612	11310	32330	26540	28257	37598	14563	35685	39745	43616	40132	21432	20428	23588.01	24010
ENSG00000065154.7	7613.79	6622	12516	9812	6633	6155	14687	4833	15189	6724	2954	8976	18058	7969	4292	14216	3415	16620	3687	5834	13424	11497	7781	3932	6396	8434	4269	15331	20730	9435	4431	7378	8333	8629	10097	8063	5488	9374	9604	16498	7109	15315	16166	8574	14325	12573	7204	11147	14696
ENSG00000065183.11	3681	4143	4141	3900	3629	1751	4954	1654	8578	3476	2918	7192	9463	7249	1691	6493	3240	10489	2148	1580	8871	3765	2849	1931	2805	6114	2702	3481	6239	2892	3913	4800	4697	2740	3540	2735	3995	4759	5892	5385	4853	7518	6491	7154	8875	2163	2133	2375	3865
ENSG00000065243.14	5872	6530	7574	4556	5653	1854	2508	4863	4705	2899	5770	5778	8380	7165	2889	4466	5361	4959	3977	4460	6224	3865	2556	3733	6533	3339	4196	4121	2939	1621	7299	2924	3319	6051	4790	3728	4425	7208.31	4337	7338	3767	7442	6331	10836	6798	2487	4077	2453	8807
ENSG00000065268.6	3797	2454	1574	1975	3568	645	1638	1668	2911	2734	2132	2629	4118	2864	4340	1409	2485	3534	236	1638	7486	1588	1109	1751	874	1525	2782	2100	6657	844	2614	1952	2191	1083	2591	2579	3990	2304	1567	2814	3001	5455	2855	4742	3172	963	881	1627	1679
ENSG00000065308.4	17477.28	16144	42781	2879	8428	21869	30339	7776	42961	3446	2788	2795	4276	16361	11422	38180	4334	33402	10229	17777	14043	27444	27370	15231	52878	1089	13493	16402	21806	30617	4283	9818	25687	25776	18913	832	4868	26839.01	20432	22752	4646	6632	17192	15561	11768	28300	24621	21208	53993
ENSG00000065320.4	30	34	4	69	23	7	622	34	13	381	3736	16	2077	103	220	36	289	7	37	135	42	609	45	107	1478	20	67	66	32	0	3552	0	36	3975	190	97	247	2	127	123	88	459	28	215	35	0	624	63	2324
ENSG00000065325.8	0	0	32	24	0	5	1	0	0	0	37	0	5	12	37	0	5	0	12	7	0	4	30	0	13	7	0	0	0	7	21	0	1	2	5	1	2	0	2	3	3	2	3	0	1	0	0	53	42
ENSG00000065328.12	2030	1697	950	489	1879	22	1295	256	2140	1229	330	35	482	1684	114	151	2658	4893	1	351	2286	84	72	440	257	12	466	492	481	241	418	1306	957	97	1475	33	4667	2496	97	893	278	2480	555	3274	2532	297	89	100	598
ENSG00000065357.15	1897	1609	1941	279	1518	947	2141	766	1334	5760	2208	3502	1579	1810	1563	2165	3665	1778	1145	1604	2277	3115	1201	1380	1898	3825	1254	1430	3408	1113	2612	967	1811	2660	1742	4225	2077	3574	1542	3481	628	1908	2076	1931	1373	1120	1872	1263	2785
ENSG00000065361.10	0	20	54	10193	0	1	16	57	94	2798	1414	4420	16	20	736	45	2211	28	84	8	5	32	9	0	51	2130	7	39	87	0	1903	1	3	28	76	6318	1325	0	29	71	9	35	19	42	17	0	18	96	30
ENSG00000065371.13	0	0	3	331.79	0	0	0	0	0	0	0	0	1	0	0	0	0	0	0	0	0	0	0	0	1	0	0	9	0	0	0	0	0	5	0	0	0	0	2	0	0	0	0	0	0	0	0	0	6
ENSG00000065413.12	115	509	388	3055	521	295	1385	161	775	92	224	30	1370	576	741	2165	218	1392	132	410	1060	933	305	316	1077	55	490	109	3185	481	284	137	340	822	430	84	565	196	675	1131	279	891	4056	576	3049	460	629	959	1422
ENSG00000065427.10	17377	10435	8764	5646	12947	4612	9491	6487	16619	11430	10309	11108	18299	12531	9000	10142	12403	17618	2334	7918	20075	9045	6373	6261	8080	14049	7441	13698	15130	7336	15731	6783	8483	5387	13910	8672	17295	14257	11296	12551	10267	20495	9904	17507	15299	7692	4748	9006	8944
ENSG00000065457.6	1145	2587	3149	2861	2900	627	2586	713	2472	1028	1669	3406	4978	4571	1394	2166	1962	3617	558	965	2815	2153	928	1554	1680	2614	1901	1451	2202	631	1997	1544	1596	1668	1661	2474	1565	1627	2413	2293	2868	4044	2933	4803	4523	686	1319	866	1641
ENSG00000065485.13	3660	3097.38	2233	366	4538	2242	5453.54	1015	2541	1115	688	2200.47	8222.68	5036.43	1432	4032	1760	2838	1214	5584	2650.86	1986	3847	4086	4514	1656.59	2788	2740	5400.75	2673	1138	1319	1608	3208.35	3557	1917	1034	3801	1309	3022	3992.73	7952.49	3937	7097.31	2281	2505	2169.38	2550	5412.69
ENSG00000065491.8	2060	1147	1154	984	897	387	399	887	804	835	1329	1094	1912	1408	1736	1138	1129	1079	213	1187	970	1015	400	1234	575	582	903	1077	902	311	1664	417	496	594	1394	831	1198	1860	1172	800	1532	1937	906	1774	725	485	646	600	714
ENSG00000065518.7	1826	676	1020	1954	671	775	867	1231	1143	2175	1542	662	990	673	4803	830	2806	763	38	1976	1192	1429	1312	1447	1002	233	1019	1195	1192	1222	834	144	865	1200	3063	506	3530	1569	865	864	828	1028	506	1082	381	1466	238	2109	850
ENSG00000065526.6	5890	6461	7087	3466	4371	4666	4376	6201	4077	3788	8372	8827	9999	9946	8154	4870	3286	5374	3307	7291.21	8507	3797	6020	8146	5155	4561	5035	2044	7742	2809	10795	3894	3163	7060	3928	5737	2837	3749	3959	4887	4841	7273	6010	10879	5648	1733	4584	3341	6621
ENSG00000065534.14	9053	2289	136448	1026	8263	245	21737	21208	2602	1071	8771	2009	1300	6916	39916	20436	20721	9941	4508	8688	2359	147757	400	4313	52673	325	990	53986	12025	370	11542	1226	970	42120	19337	224	21108	2313	115120	77546	216	5018	93981	4208	60767	78	27168	3490	78640
ENSG00000065548.13	4261	3775	4565	1933	4661	1439	3955	2311	5031	4032	3299	11686	7851	5983	1337	5750	4566	9675	4141	2211	9140	3381	2351	1809	3316	7650	2102	3692	5563	1965	5329	4527	3208	2834	4124	8683	5010	4102	5905	6580	3813	6102	7179	8843	7498	1798	1800	2977	5211
ENSG00000065559.10	2613	2574	3225	2510	2385	1296	2634	2032	3229	2983	2804	5618	6269	3400.99	3309	4689	3114	4737	819	2031	3697	3525	1792	1389	3105	3156	1848	2575	3733	2295	3061	1986	1707	2854	2813	3759	3362	1977	3156	4466	3607	5505	3650	4443	4330	1547	2110	2295.88	4082
ENSG00000065600.8	898	763	660	721	874	163	504	721	789	978	2343	1605	804	962	1195	1035	1137	698	105	818	1710	648	103	786	267	1246	551	575	942	247	3518	724	338	352	974	1173	1229	1555	865	505	357	922	1342	674	1015	309	181	377	297
ENSG00000065609.10	8	13	8	0	0	0	0	4	22	0	43	3	140	28	37	0	0	0	0	2	0	1	0	17	14	5	20	0	0	0	10	0	2	102	30	2	0	0	4	0	39	25	221	69	17	49	13	25	37
ENSG00000065613.9	14421.06	12171	8967	6915	11858	3567	18207	6915	11069	12695	7501	26989	25988	14180	3831	11208	7925	15052	6552	7484.04	20787	11518	5838	6387	10750	22742	7001	7284	8870	4469	10989	7870	11432	13792	6661	28497	7100	13283	11564	18927	14470	17694	14991	27289	22621	4897	9413	7023	14344
ENSG00000065615.9	1469	1057	1183	1105	773	506	550	807	1570	772	1291	1979	2337	833	612	992	831	1321	467	648	1334	727	697	630	1726	1631	605	1375	849	534	1728	1131	766	1841	1533	1802	1589	1218	964	1562	878	1543	1114	1506	1493	798	1009	671	1952
ENSG00000065618.12	594	170	0	48	58	20	172	169	26	78886	38	163321	8	71	0	32	139	126	15	73	850	7	12	10	12	102246	169	2	43	32	67	147	16	8	1617	103545	116	1040	2	365	4	209	12	201	48	70	96	47	59
ENSG00000065621.10	72	35	297	178	18	26	301	401	117	1511	851	1340	190	45	376	296	549	418	240	95	29	243	44	76	816	1452	18	237	229	55	1162	24	67	381	1325	2064	434	15	179	558	230	77	305	60	183	74	67	49	691
ENSG00000065665.16	124	217	592	406	174	74	276	368	462	65	417	480	364	347	358	477	386	654	185	215	216	201	116	207.99	399	329	157	234	307	132	481	244	214	346	249	391	385	376	291	480	282	379	491	351	738	172	260	280	442
ENSG00000065675.10	7	3	12	0	16	0	2	23	16	272	728	482	278	35	612	3	786	1	4	157	140	13	1	122	12	231	1	2	3	24	945	129	0	0	77	185	491	14	28	0	73	96	15	109	21	0	14	8	17
ENSG00000065717.10	388	755	118	19	1108	2607	251	1035	52	44	322	21	439	2170	215	178	119	49	153	1042	1143	209	2678	1556	368	20	1184	152	358	986	575	460	25	205	221	53	97	256	298	56	1238	304	69	2347	10	2000	116	1067	254
ENSG00000065802.7	702	1224	2783	831	1121	1088	9045	1421	5538	2053	3788	8044	2360	1991	3051	5977	2656	7931	2035	1547	3375	4495	1610	1637	1637	6686	1062	3545	9281	2462	4599	929	2832	2711	4489	9678	2331	2127	3775	5357	1293	2263	5933	2669	6837	2328	2060	2006	1957
ENSG00000065809.9	9831	10954	1479	559	5693	257	7049	2237	206	568	2815	1994	21534	7813	1013	2697	3863	2821	221	4821	17778	2844	260	4444	2185	2034	9157	866	3315	545	3693	6052	155	1970	2709	1972	2580	8443	2005	5248	6842	13482	2429	12421	3585	802	155	3207.97	4254
ENSG00000065833.7	1900	1366	4064	690	1040	1010	962	1856	3028	3467	1840	4088	538	1068	1103	1360	1649	1798	1255	1766	524	2947	1370	988	2395	2140	578	3142	1916	1923	1755	688	1450	2721	3449	4600	2352	2653	3035	4964	321	1864	4314	3601	3500	1289	2444	2762	2386
ENSG00000065882.11	13507	5771	5373	1719	11904	1361	6657	2910	5197	1997	4901	1971	9916	7957	8785	7650	9380	9465	1935	5837.08	8620	2770	2347	5162	7071	1802	4814	12241	6332	2244	6896	2668	3043	3951	7703	1504	11129.03	10714	4198	6155	7542	10303	11364	10616	12971	2648	3291	2684	9866
ENSG00000065883.10	5065	6827	7344	4089	5029	3440	4776	6291	6074	4330	6598	10950	9250	7533	6790	8909	5041	8842	3551	4688.55	8008	8999	4133	5771	5893	5804	5623	4443	8351	3290	8510	3876	4262	8102	7010	8237	4929	5341.45	8399	8282	6058	7512	12109	10294	8789	3699	6515	6093	8397
ENSG00000065911.7	6620	5081	13532	4333	5721	3418	6791	3512	13501	6041	14370	37079	3902	6687	7444	13734	7437	21566	2432	2916	10361	6708	5038	3067	9300	25186	4086	13931	31324	12384	20625	10883	6129	2960	19659	25079	12047	6123	24273	6204	7645	7556	28793	7183	19118	15630	7607	16223	11707
ENSG00000065923.5	412	1387	4895	42	806	347	6674	104	5703	727	1328	2385	521	1936	1464	8657	1121	11352	464	848	4218	8121	510	514	326	920	1995	1692	9008	1866	1374	1461	3049	4270	3134	1413	1411	2193	3435	7356	1621	2579	7860	2831	5984	1295	6219	129	1849
ENSG00000065970.4	1672	1190	1313	1084	933	1208	820	2261	1643	1317	2587	1420	1361	1163	2717	997	1666	1043	771	1656	754	1521	1782	1336	1862	610	937	1359	957	1261	2743	372	1022	1813	2414	1032	1783	1417	1250	1770	857	1142	1422	1754	1505	1410	1603	2469	2359
ENSG00000065978.13	39628.55	26072.58	23487.48	14026.64	41706.6	15358.39	54298.62	13727.87	36012.33	32066.2	34825.29	65708.76	42212.18	38606.54	22594.13	37073.4	38975.24	56286.46	6275.92	21853.49	55609	37592.2	21331.1	17633.15	28111.75	56093.91	18384.01	41817.3	61121.47	23289.51	46432.98	18562.13	37695.36	37562.41	46032.99	55953.61	50437.17	24060.09	27795.14	46888.21	28440.22	51610.89	43384.83	66788.3	52347.36	25698.46	16507.49	29908.21	30774.55
ENSG00000065989.11	499	268	323	496	164	1084	220	1044	429	6	161	35	359	454	1118	273	73	286	142	360	260	571	1429	338	571	24	308	591	413	732	225	107	396	841	874	24	197	673	380	954	219	290	576	603	436	425	483	666	601
ENSG00000066027.7	4278	3560	2638	1632	7306	1302	2240	1977	2962	2235	2125	4491	6153	3560	3934	3617	3567	3097	1275	4061	3280	4583	2068	2942	2214	2553	1894	3535	2179	1914	2789	3129	2292	3942	2819	3003	3355	3191	3260	4366	5123	6888	2997	11211	4289	1751	2320	3412	3148
ENSG00000066032.14	0	0	0	41	0	2	0	0	0	0	78	0	2	0	73	3	6	0	0	0	0	0	0	1	2	0	0	0	0	0	156	0	0	0	0	0	32	0	0	4	0	0	0	0	11	0	0	0	0
ENSG00000066044.9	5546	4322	4146	2565	4632	1930	3396	4179	5853	3994	5218	4465	6862	6462	5689	2841	4204	5937	598	4264	7586	2886	2816	4207	2574	3932	3083	3987	4988	2210	7081	2615	2809	2534	5826	3068	6842	5488.98	2814	5064	4517	8189	4192	8703	6140	1979	2034	3542.88	3331
ENSG00000066056.9	62752	47381	14	0	83010	450	1659	116	0	0	753	5	154333	129855	164	389	172	1063	263	42523.98	95592	19	391	43600.86	18	29	51196	1089	601	682	958	36237	4	4	483	0	18	39653	5	166	150659	113391	8295	181754	14989	465	1	206	83
ENSG00000066084.8	6876	11001	7256	13681	7376	2482	3699	3540	6095	6586	8849	8589	16946	11133	6950	5786	5823	9097	2625	5619	11650	6551	3735	5102	6566	5275	6178	5018	8161	3920	11454	3912	4207	6550	4968	6346	5287	6019	6213	8380	8262	14503	10395	16010	10074	3344	5556	4798	8639
ENSG00000066117.10	5307	4948	3039	3373	2949	1149	1270	2678	2793	3662	7075	2383	4575	4276	7241	1184	6307	2222	741	3383	3963	2095	1376	3321	2425	1424	4487	2154	1858	1401	7659	1871	2046	3322	3588	1733	5813	4914	1556	2626	2879	5288	1740	8803	2372	1723	2414	2272	2986
ENSG00000066135.8	3277	5100	6096	4006	6367	3044	4755	2926	4428	3822	5535	7696	11756	9619	6055	5340	4126	7588	5432	4611	10680	6442	3961	3938	3990	4335	3930	4135	9226	2909	7381	3623	3464	6871	4138	5653	3002	4066	6599	9118	6107	10676	10178	10621	7908	3020	4531	4183	5654
ENSG00000066136.15	2124	773	857	1078	1184	649	1206	1576	1286	1318	2069	1348	1574	1380	2542	891	1699	1922	131	1013	1542	1395	933	1018	630	1092	567	1809	1470	905	2339	555	788	1193	2028	1096	2583	2043	1052	1425	930	1374	1118	1677	1373	944	807	1245	960
ENSG00000066185.8	8	18	10	46	16	58	35	36	4	5	24	16	39	37	39	74	21	28	20	22	9	133	56	2	66	14	2	74	7	28	15	17	5	51	22	22	9	0	61	16	30	51	58	29	31	61	16	79	58
ENSG00000066230.6	0	0	0	8	0	0	0	0	0	0	1	1	0	0	0	0	0	0	0	0	0	0	0	0	0	0	0	0	1	0	3	0	0	2	0	0	0	0	0	0	0	1	0	0	0	0	0	0	0
ENSG00000066248.10	99	7	12	0	4	20	1281	4	677	355	290	86	3	18	202	16	373	189	56	18	127	376	0	5	592	21	1	295	17	19	219	2	444	373	327	296	178	8	0	37	0	25	54	21	1330	44	75	104	715
ENSG00000066279.12	13354	9028	12301	6170	11173	532	10295	3742	10872	4700	1402	135	3571	6277	1888	1869	11881	16456	699	1082	16766	575	727	2096	8675	117	3434	12724	2807	1698	1387	7002	10609	3471	8372	212	11642	13086	516	21475	1245	16855	8710	31181	39909	1627	851	810	14618
ENSG00000066294.10	0	0	0	0	0	0	6	0	0	0	0	0	1	2	0	0	0	0	0	0	0	0	0	0	0	0	0	0	0	0	1	0	3	0	0	0	0	0	5	0	0	0	0	0	0	0	0	0	0
ENSG00000066322.8	5320	2481	1934	1578	2794	1208	3414	991	3853	4762	3448	2045	2818	3084	5626	1526	3803	3997	324	2895	4239	2247	1336	2287	1906	2314	2088	3584	3654	2360	3931	1072	1992	1403	5304	3120	5886	4810.97	1654	1796	4095	4737	2330	3396	2587	3215	1669	3554	2362
ENSG00000066336.7	0	0	0	1	0	0	0	0	0	0	4	0	5	0	0	0	0	0	0	0	0	0	0	0	0	0	4	0	1	0	0	0	0	0	0	0	0	0	0	0	0	0	1	0	0	0	0	0	0
ENSG00000066379.10	611	443	383	332	1054	330	536	729	948	1057	465	1400	1725	676	555	633	613	1107	107	421	1540	527	449	250	400	1238	260	635	1371	168	629	507	727	528	586	1074	619	1071	1092	743	915	1669	946	391	807	287	273	544	509
ENSG00000066382.12	1	0	0	107	1	0	3	28	0	0	35	0	26	12	8	0	13	2	1	0	0	30	0	2	164	0	3	0	0	0	31	0	0	12	9	0	3	0	4	48	7	33	4	9	3	0	0	0	141
ENSG00000066405.8	0	0	0	0	0	0	0	0	0	0	0	0	0	0	0	0	0	0	0	0	0	1	0	0	1	0	0	0	0	0	0	0	0	0	0	0	0	0	0	4	0	0	5	0	0	0	0	0	5
ENSG00000066422.4	2829	3265	4926	3057	3168	1593	3502	2519	5338	2939	2849	8484	7245	6276	2323	5873	2331	6656	1779	1780	5410	3957	2002	1900	3779	5939	2118	2716	4745	2300	3635	2927	3584	3984	3523	5454	2544	2996	4761	4743	4303	6232	5777	6788	5828	1645	2431	2096	5480
ENSG00000066427.17	1590.37	1782.69	2840.94	2318.09	3915.12	1390	2629.58	1730.69	1782.26	1522.77	1457.59	3389.23	16837.03	5826.74	1268.12	5348.1	1256.67	4218.68	1596.78	1334.44	4250.38	3284.61	1503.57	1310.56	4083.74	2590.14	1511.83	1395.13	2511.85	1144.94	1803.63	2236.5	1779.66	5265.57	1307.3	3199.09	1020.83	1595.93	5109.16	4985.11	12094.6	9181.68	4766.54	6774.3	3533.95	1369	2412.08	1576.51	5697.16
ENSG00000066455.8	3385	3383	6378	3327	2923	2835	4839	2919	5634	2837	3303	6061	4978	2994	3027	7926	2441	8248	1659	2712	4601	4861	3807	2496	6073	4033	2612	5318	7001	3558	4435	1782	2869	5007	4693	3905	2344	2760	5445	6286	4069	4554	6680	4356	6549	3646	4617	5477	6898
ENSG00000066468.16	3	0	54	0	0	2	1	0	0	2581	937	4197	14	0	980	17	229	17	0	2	10	9	13	5	5821	1832	0	0	0	5	602	8	0	369	45	1847	327	0	14	10	2	14	230	22	31	0	2046	25	6438
ENSG00000066557.5	2509.96	2256	2385	1478	2678	455	1973	1247	2829	1798	2050	2003	3785	3061	1428	2364	3431	3851	922	1571	3905	1485	809	1105	1756	1521	1371	1304	2693	1522	2835	1686	1570	1996	2615	1520	2799	2345	1855	3676	2037	4164	2203	4392	3594	1205	1363	1305	2471
ENSG00000066583.7	1461	571	1683	340	982	636	761	943	1392	1385	1135	1473	1168	1125	876	1441	2068	2714	210	685	1625	1316	1117	727	671	1017	362	1381	1517	901	1617	953	532	597	3691	654	2393	1833	1564	1570	845	1360	2212	1049	3714	1006	408	1886	1472
ENSG00000066629.12	3364	2804	3227	1373	3438	1878	5138	924	4018	331	854	333	8065	2744	707	2679	1506	3702	1356	2119	4831	13294	2130	1721	4796	133	2095	737	4197	1910	1170	3285	2093	3672	2022	686	1613	4122	3992	8126	2492	5921	7950	4373	7831	1928	2903	2973	9101
ENSG00000066651.13	509	584	1408	723	490	381	857	578	1246	1021	552	1678	1038	800	509	1661	1032	1275	1292	290	914	992	572	330	1274	1328	467	963	1374	488	1082	572	879	1293	989	1220	1244	174	1166	1750	634	965	2033	697	2597	397	616	503	1427
ENSG00000066654.8	3465	3664	4499	2714	5457	2334	3904	2890	3949	2753	4909	12819	12697	5771	3242	4998	2403	7319	1068	2433	6753	4444	3422	1625	3808	6853	3434	2608	5720	1832	6338	2888	3042	4346	3740	7617	4003	2268	5891	5575	6627	8346	5458	7715	6344	1887	2567	2540	5207
ENSG00000066697.10	4827	2847	3012	4006	2399	569	2532	908	3595	1014	2537	1526	4334	3060	1688	3631	3030	4405	1011	3667.98	4433	3089	989	2528	2291	1692	1812	1603	3292	1081	3431	1606	2488	2487	2914	1968	4027	3533	3368	3361	2305	4849	3699	3072	4795	1250	1243	1286	2732
ENSG00000066735.10	2304	2573	7	25	6278	1	91	194	13	373	97	244	4543	1820	347	27	113	5	1	1398	5850	76	2	2739	144	69	1171	266	9	72	52	606	3	1096	68	264	219	1378	27	56	7572	4652	391	6788	379	77	36	1	363
ENSG00000066739.7	5143	6851	9102	7384	4025	3080	5716	4350	8054	2355	4084	3542	9880	6368	4933	6060	3022	6361	3638	3239	5541	8799	3952	3272	11629	2095	4177	4150	5697	3258	5530	2954	6049	12197	4104	1947	3079	6521.01	6801	11917	5225	7704	8925	9610	8806	3017	7460	4903	12901
ENSG00000066777.4	6789.91	10784	9504	4901	9571	2795	5627	3693	7485	4011	10117	15924	22370	15714	6129	10782	7357	9902	4585	6010	14039	9689	4303	5159	11421	8036	7229	6358	8223	3467	12708	5818	5809	13030	5114	8709	5815	8001	8247	15270	10497	20670	12100	22509	13748	3023	8631	3801	13646
ENSG00000066813.10	5	3	0	0	20	0	0	0	0	0	0	0	57	2	4	4	0	2	22	0	0	0	2	2	0	0	8	0	0	0	0	0	0	0	0	0	0	0	0	0	14.3	20	0	6	0.5	0	0	0	0
ENSG00000066827.11	953	1335	1407	1245	1120	767	1275	734	1363	353	893	950	1459	1771	1161	1570	758	1447	342	865	1840	1531	864	836	834	849	1090	804	1283	436	1343	484	1146	1661	722	811	702	1071	1091	1401	1268	1464	1412	1739	1662	654	1420	561	1300
ENSG00000066855.11	1995	2104	2014	1277	1732	563	1428	859	2885	2562	1585	4178	2447	1369	1079	2853	2110	3508	1134	1179	3924	1367	947	904	1688	3036	1355	3099	2703	1057	2325	1432	1653	1398	2676	3458	2303	2220	1446	2448	1332	2693	3128	2363	3644	1177	923	1467	1734
ENSG00000066923.13	16	22.33	7	107	15.27	6	119.12	22	255.93	16	118	27.01	44.02	21.04	24	176	38	621.37	39	6	24.09	68	55	52.5	21.01	15.08	47.02	55	59.2	11	62.43	23	73	74	42	5.01	6	1	135.08	143	14.02	21	76.05	43.02	111.05	52	8.04	22.19	28.83
ENSG00000066926.6	3216	1866	2520	3024	2675	1452	2540	1901	3736	1647	3112	2103	7717	2248	3345	2672	3506	2870	933	1182	4362	3597	2602	1130	3490	1753	1401	3503	3998	2198	3775	2189	2457	3299	3113	2144	3989	4382	2234	4066	2896	5764	3803	4807	3044	2054	2581	2897	3512
ENSG00000066933.11	4373	6406	9590	5556	6509	3286	10657	3389	9868	2821	4377	8620	14337	10536	6876	12292	4861	9901	8352	3399	6818	10108	4256	4551	15637	5879	4503	4774	8252	3901	5199	3188	7856	14162	4518	7170	2758	4392	10148	16262	7351	9655	14749	11767	13952	3557	8248	3519	21977
ENSG00000067057.12	26308	20290	8145	8601	27672	4774	22888	6388	34711	21756	21362	10462	22998	29504	30064	25609	37823	47059	1622	18744	53340	17193	5808	14440	5780	17125	18405	11297	44983	15661	27446	20386	8729	4491	31596	16602	33672	43502	7623	16652	12329	31265	26971	40264	32254	22053	3694	10356	6781
ENSG00000067064.6	5537	2990	9684	8737	4614	1687	5381	1412	3389	6998	3355	6802	4507	2595	2659	4121	2916	5041	2469	2025	3214	3277	1958	2153	3601	3892	929	15186	6516	4091	4970	4126	6547	8895	8606	3975	7973	2086	7134	8393	4833	9595	18179	7918	14517	3671	3449	7944	4176
ENSG00000067066.12	8388.9	8452.22	5485.85	12608.84	5707.03	3760	7615.71	2281	6591.9	1825	3031.2	1091	5906.21	8284.38	2852.85	9694	2306	14006.99	3650.1	7263.89	8112.91	6815.71	4401	7852.66	6061.49	1476.97	5300.26	4302	11862.55	3338	3816	5589.02	6691.08	6848.47	4498.47	775.85	2299.95	6115.25	5859.83	7414.94	5234.2	7203.01	7179.49	7214.65	6551.95	2451.28	4675.85	3912	9543.35
ENSG00000067082.10	12236	11423	2935	6325	16198	3690	4612	5684	8251	3832	15027	18002	11621	22669	9893	4134	11332	9567	2923	13746.52	12823	4511	5606	18655	5429	6662	6643	3826	5616	3700	18654	3612	5488	8714	5923	3773	6950	7910	4592	9213	17355	15235	5087	14959	7508	6760	5394	6930	6222
ENSG00000067113.12	2171	1133	3353	891	1561	4794	3721	11275	2267	1328	979	1005	13283	7573	2603	4724	1404	2028	2170	1110	896	7788	6402	950	12963	808	1677	3212	22169	11303	1159	423	1437	6480	1992	1132	850	1157	2945	7853	8167	15795	2519	6210	2491	7154	4421	8179	7783
ENSG00000067141.12	67	24	7174	1924	71	3233	3410	3077	1147	1034	5649	1741	289	843	9628	1885	2752	888	3061	430	12	3234	3398	248	3769	1474	18	4923	1914	4840	6898	63	1135	4251	3734	1522	2156	2	4858	3063	8084	231	2863	1165	2845	2638	1873	12299	5532
ENSG00000067167.3	12737	17640	49218	10269	24515	10226	29120	13720	28409	7147	12601	32168	40710	19990	29955	45198	10077	35285	3150	9723	28718	26813	14958	9755.27	101697	39786	12632	38258	42547	18531	15961	12002	14480	17185	30028	17535	11458	16692	24781	24313	25734	34693	36976	27508	25719	17544	21855	19633	106129
ENSG00000067177.10	1422.64	1013.22	1577.79	1105.2	613.08	1302.29	2851.69	1057.8	1574.31	1938.94	1152.97	6137.13	3672.17	1550.62	1606.04	1534.99	1198.27	1448.86	421	548	1809.6	1456.54	1609.59	462	833.02	2944.5	876.18	1488	1998.04	560	1544.76	948.31	965.87	621.33	1364.92	3473.29	1775.81	2240.07	1129.21	1476.91	1566.84	2149.69	2358.35	2574.43	3564.84	709	252.45	811.07	1252.27
ENSG00000067182.3	9225	5747	6156	3701	2774	14146	4584	16258	11691	9386	6410	2912	4557	3268	21264	3689	9246	7441	3975	9163	4367	8270	19861	7131	11285	1625	4904	21641	4604	14033	8075	1392	10911	9674	13420	2624	9163	10528	7113	8224	3855	4541	3829	3869	4080	18749	8521	21257.1	14091
ENSG00000067191.11	150	271	509	260	89	224	492	320	740	412	766	146	165	124	621	415	341	208	220	221	242	565	245	238	443	261	177	547	436	356	683	73	532	923	606	377	351	213	307	575	117	200	634	156	563	714	788	840	516
ENSG00000067208.10	1836	2764	6589	2132	2227	3819	6251	2658	2624	1532	2755	4992	3892	2289	2460	10575	2242	10643	3563	2422	7652	3508	4092	2923	3729	2360	2711	2910	13195	8106	3058	2579	1851	4139	5946	2763	1206	2082	4235	5595	2304	3747	5572	3337	4448	8024	2770	8922	4463
ENSG00000067221.9	1199	542	699	594	730	481	1315	645	1277	842	793	502	829	1093	1201	1242	880	2007	167	747	684	1400	694	510	438	602	389	1583	1453	688	1334	348	543	886	1559	467	1552	1584	855	1483	1211	1053	1345	1392	1272	1055	1218	883	696
ENSG00000067225.13	115113	76453	139785	80629	85017	46487	166415	57908	190974	133119	56217	53763	59610	90650	109264	136080	152336	224599	30840	67237	127585	159413	58841	37320	120521	75801	48769	183911	156183	103707	71776	57890	100579	150028	166159	77997	171054.77	142767.56	79275	211231	54477	158382	159650	135480	188527	97570	141993	77774.05	154044
ENSG00000067248.5	4862	4712	5614	3200	3316	2327	6933	2776	7022	3587	2298	3890	5213	4003	2128	5931	2503	8200	2927	2288	6418	5524	3667	2082	6519	2477	2569	4973	5527	3774	3596	2873	4175	5187	4461	2914	3431	5968	6092	9969	3027	5393	6539	7349	7785	2308	3073	3742	8049
ENSG00000067334.9	3440	2819	2961	1633	2582	1098	2947	1453	3139	3282	3353	5200	4522	3147	906	4079	3788	5941	1977	1950	5500	2258	1536	1886	2760	3138	1754	1712	3682	1600	4730	2435	1884	2086	2587	3897	3964	3394	3453	4177	2685	3608	3310	4695	4400	1019	1516	2083	4182
ENSG00000067365.10	763	861	1027	677	800	465	945	1064	1832	788	1520	831	1029	907	1518	1604	899	1969	1299	545	1093	1375	320	562	883	734	889	1565	1518	576	1378	553	1172	1217	1789	977	1042	790	1212	2225	766	1064	2064	1127	2037	1137	765	970	911
ENSG00000067369.9	4603	7129	13791	4949	6279	3275	11072	3255	8554	3288	7015	6409	17814	14494	6288	15069	5023	17746	6920	5021	14956	16001	4652	5651	12329	4312	6313	8764	15244	3218	8566	5693	5698	14282	6953	4976	3998	6320	15756	22405	9897	14204	25749	15091	22686	3341	10013	3421	15371
ENSG00000067445.16	101	318	1267	356	72	494	709	2588	630	71	1614	0	450	576	3108	2202	1526	1500	691	548	379	2613	465	872	1488	0	144	602	2987	345	1651	476	446	1168	2036	1	648	40	1361	2145	609	253	2047.28	732	742	779	1242	1986	1555
ENSG00000067533.5	2010	1762	1791	929	1100	392	1281	430	1702	1476	1772	1698	1865	1605	1053	1898	1953	3519	1084	905	2410	878	502	778	1863	1697	840	1032	1465	827	2879	1828	1149	974	1782	1288	2259	1975	1913	1304	1372	1935	1979	1873	2598	1222	1111	823	2367
ENSG00000067560.6	33886.89	31665	29611	13835	39003	15043	32483	26360	50068	27002	20550	14873	53819	30169	20113	32428	29552	45757	24673	27652.47	44546	25866	19723	21242	47559	24995	22613	34820	46551	21874	29686	19439	24753	43222	34208	17076	21375	35284	21273	48402	26239	60701	34080	48139	40613	29408	25283	31564.57	55530
ENSG00000067596.6	6587	6971	7096	5870	7435	2653	7168	4306	6563	4874	4565	4993	12047	9478	5032	5508	4460	9720	4184	3522	11043	5748	3744	3851	5369	4321	4988	4502	7946	3928	5694	3907	4922	7905	5831	5134	4092	6773	6291	8710	8155	11860	6210	13320	8510	3689	5831	3954	6215
ENSG00000067601.6	39	75	81	93	131	23	77	52	93	30.17	71	47	191.36	87.13	99	78	46	108	163	6	172	39	38	59	127	93	40	0	216	36	37	102	38	165	26	128	51	0	78	110	73	124	95	92.42	104	17	84	56	85
ENSG00000067606.11	388	46	144	78	140	32	134	29	160	1886	2270	2635	3537	2143	3453	257	2308	151	90	235	27	97	4	104	248	2462	96	74	44	114	3139	22	43	153	269	2337	1400	125	110	52	2806	3649	1057	1847	620	53	48	255	264
ENSG00000067704.8	10654.78	7275	7926	6953	8411	5116	11430	4780	12507	10828	6967	15228	19314	11417	6806	11734	13094	17664	7501	6782	11199	10753	7399	4276	8813	12837	4582	10518	10532	6743	9670	4907	7333	7659	7585	10510	9241	13172	8975	16328	9838	17909	13259	19418	16162	7110	4628	8178	10958
ENSG00000067715.9	1303	542	462	23	812	17	138	511	196	9	1281	137	1287	4562	2377	409	249	961	332	663	422	144	0	1235	2	109	276	623	5378	6	1256	624	8	143	2436	34	215	450	59	331	1022	1178	285	1768	398	0	90	138	40
ENSG00000067798.9	3096	7070	30843	3945	1138	1801	6507	1512	18353	169	2473	818	1671	547	2844	10853	2410	14043	4034	2628	4280	6116	2272	1192	369	222	3720	5676	5667	4170	2496	1969	7517	8348	9308	190	3728	5438	8806	8716	164	2718	13842	863	25040	2818	7697	8969	1920
ENSG00000067829.14	3250	1659	1403	1495	2007	2134	2334	2842	3048	2380	3108	833	2726	2377	4739	1164	2259	2480	136	2314	3168	2324	2392	2063	1350	976	1300	3326	2921	2392	3171	1011	2031	2053	3894	930	3635	2741	1576	2469	1491	3027	1738	2702	2153	2530	1734	3016	1514
ENSG00000067836.8	663	424	768	388	444	220	409	442	770	879	752	441	1573	917	2212	795	1555	1027	139	711	719	665	168	718	299	513	321	1007	1081	676	1302	222	245	665	1072	784	842	858	478	875	1544	2175	605	1017	573	701	473	2045	560
ENSG00000067840.8	0	13	26	167	0	54	60	44	96	0	72	2	100	102	22	74	21	8	63	9	17	52	132	10	74	4	38	2	14	273	235	0	11	35	59	5	3	0	36	13	97	66	18	39	24	97	129	689	115
ENSG00000067842.13	0	0	0	0	0	0	0	0	0	0	0	0	4	3	3	0	0	2	0	0	4	3	0	0	3	0	0	0	4	0	0	0	0	0	0	0	0	0	1	0	0	0	12	3	1	0	0	0	11
ENSG00000067900.6	5573.03	7114.76	7933.68	2908.57	6677.1	2732	6387.68	3445.77	8265	4290.72	5578.4	8568.78	12212.92	9669.64	4334.98	7894.7	5440.6	12117.5	6691.94	5305.83	10947.75	6692.86	4136.26	5406.35	6973.05	4166.17	4092.7	6125.44	9573.52	3965.92	8782.72	4242	5549.54	8376.45	5987.95	5754.74	5233.4	6135	8312.25	11269.48	7279.42	11565.48	12780.35	15710.15	14429.65	3618	5692.79	8968.44	10377.79
ENSG00000067955.9	5363	5919	6113	4946	6427	2018	9660	3065	6613	4754	3905	8676	9287	4833	3475	7686	7687	16843	1660	2963	10837	3569	2719	3164	6760	7297	3878	4469	10630	2868	5802	6257	3630	4468	6055	7383	7459	5741	6708	6052	4522	9940	8309	7603	14913	2212	2532	3598.01	7974
ENSG00000067992.8	477	585	233	898	432	299	2483	594	964	618	577	399	324	280	914	1601	961	907	115	535	688	498	546	297	2923	327	292	189	252	728	375	244	391	476	586	447	461	569	438	665	211	556	868	653	863	731	357	308	4148
ENSG00000068001.9	38281.03	30496.56	3736	2715	27973	2775	6405	3608	3074	5499	5937	4048	47209	54602.33	11846	4581	8485	7022	256	29776.97	61526	5548	2674	30634.32	1401	3592	21861	5518	6658	4359	6640	12697	1894	1748.04	7406	4171	9566	26113.02	3749	3608	47399	48423	4924	45267	5057	4014	1709	5554	1851
ENSG00000068024.12	1062	907	1568	3492	1029	1484	1511	3347	1620	1008	1459	1629	4981	2049	2742	1058	1405	1871	696	1427	1394	2789	2044	1507	5065	701	1042	1208	1602	1600	1592	485	1261	2938	1468	879	1043	1352	2398	2830	3073	3025	2235	3955	1468	1200	1962	1786	3808
ENSG00000068028.13	1767	637	1813	1051	1305	865	2309	1987	2162	1179	789	1210	1487	1808	1127	3364	1551	2499	547	992	1167	2420	920	1374	894	1499	441	2157	2679	1570	1209	526	1224	868	2245	898	1799	1341	1590	3306	1534	1483	2360	1487	2817	1817	1375	2565	1240
ENSG00000068078.13	109	30	86	4	56	11	43	92	53	11107	264	1724	257	199	2000	42	206	100	13	3	62	30	16	114	54	2135	40	129	103	394	273	24	17	35	171	10422	149	18	12	27	127	172	34	152	55	247	7	280	154
ENSG00000068079.3	3424	164	839	4046	1045	859	1350	420	838	174	291	46	421	362	1344	737	677	757	482	864	400	1465	1026	718	1254	28	187	1763	925	1075	335	1610	765	1314	1709	90	649	1539	1182	1679	335	438	1080	644	929	1121	1406	1769	1398
ENSG00000068097.10	1822	952	2634	1620	724	904	945	1982	1806	1065	2372	1860	1231	933	4341	1966	1599	1707	543	1053	1570	1582	1040	1202	1832	935	883	2834	1685	1065	2964	573	1264	1933	3613	1174	1905	2168	1633	2566	617	1188	2208	1747	2562	1299	1760	2115	2704
ENSG00000068120.10	2756	1030	1255	1155	1046	987	464	2133	1709	2595	2159	1245	876	1681	3590	543	2916	1688	318	1656.69	1135	1211	1543	1380	711	542	1027	2391	758	636	2163	343	931	961	2659	1115	4131	2766	631	1456	686	1098	952	2503	1113	928	870	2262	896
ENSG00000068137.10	750	679	1025	760	763	1038	1192	1993	1323	4096	631	1386	2343	1017	2070	1119	982	1181	647	874	650	1914	1138	752	656	1212	852	1960	1528	1367	1166	375	793	2361	1177	2516	723	829	1938	2895	1120	1974	1855	1952	1585	1591	1289	4259.87	695
ENSG00000068305.13	4655	4983	3473	1736	2420	1892	3330	2400	3222	1665	5424	2833	4754	4294	6756	4967	3880	2774	2604	3487	3337	5583	2786	4112	5020	1504	4050	2341	2632	3632	6900	1080	2586	10723	3233	1776	2255	2910	2601	5928	3137	4578	3313	3559	2755	2955	3509	5080	7071
ENSG00000068308.9	2748	1901	1848	1624	2153	1780	2495	1769	2633	2568	2985	1289	3227	2811	4749	2136	3799	3441	685	2553.95	3063	3462	2604	2506	1592	1267	1769	3926	3638	1988	4481	759	1665	1869	4281	1645	2783	1808	2075	3108	2223	3241	3357	3632	2845	1968	1589	3233	1970
ENSG00000068323.12	7175	2234	3347	1622	1635	4777	2127	6094	4295	3719	5235	1747	1478	1842	6842	2916	5827	3213	1025	4155	2094	5477	5724	3929	2833	832	1637	7452	2617	4043	6541	883	2857	3658	7009	1556	5980	7688	2436	4042	1220	1810	3796	3106	4149	3840	4826	6302	3863
ENSG00000068354.11	1124	690	535	484	499	724	376	960	716	888	963	484	883	903	1551	445	768	616	320	1073	532	689	812	721	596	261	520	985	513	767	792	142	462	842	1055	334	1099.98	1194	368	761	880	796	472	1179	556	902	937	1404	721
ENSG00000068366.15	15986.96	12371	20907	6876	8712	5841	19394	15303	22838	8139	9414	11731	12335	8791	6434	46137	10837	39394	7791	7509	19199	30270	9302	5366	17002	8233	7292	15673	16761	8288	13236	9970	18588	18463	15834	4166	11908	23832	53526	40602	7227	15969	29658	17852	36181	7411	12861	7141	20334
ENSG00000068383.14	2516	2010	2109	1202	2832	813	4300	1224	1367	1133	2815	1595	2213	2180	4752	3595	2301	4191	624	2153	3579	4412	1043	1717	1084	1580	1554	1787	5032	1867	2981	885	1113	2105	1747	1779	3603	1411	2118	3583	1699	3247	3915	2651	4428	1599	1346	3167	1064
ENSG00000068394.9	1837	794	636	586	1974	622	1274	1077	996	1223	1233	1825	1826	1675	1369	1177	1874	1695	506	885	2359	1086	777	1102	702	1275	767	1811	1829	828	2079	760	511	741	1563	1846	1615	1586	1032	1534	1210	2004	1142	1846	1641	970	605	1149	785
ENSG00000068400.9	1858	1283	1213	1048	2622	968	3292	1084	651	944	2088	2369	2324	3571	1880	2557	2412	3493	664	1873	4343	1719	1106	2150	738	2018	1080	1115	3503	833	2999	1443	648	830	1885	3119	1562	1817	2186	2307	2376	2246	3206	3632	2583	1102	899	1629	1103
ENSG00000068438.10	3753	2519	2144	1546	2155	1226	2303	2176	7104	3652	3323	7349	2849	2126	4117	2712	2884	4306	321	2336	3467	1899	1571	1792	1568	8085	1718	4931	4114	2553	4108	1294	2582	1931	4925	6695	5705	4529	1233	2821	1795	3449	2406	3624	2855	2711	2324	2899	1682
ENSG00000068489.8	4795	1385.95	742	798	1286	189	632.88	1072	858.46	2241	537	106	357	624	785	203	4364	2043	107	798	1069	209	267	911	609	51	670	3363	425	624	618	408	1119	508	2619	97	5654	3831	65	1827	117	1626	791	2908	1939	418.95	233	187	1016.56
ENSG00000068615.12	97	57	19	8	25	1	34	1	612	22	53	9	4943	624	92	26	44	10	0	6	15	2	1	4	18	3	59	0	3	0	86	4	4	4	11	0	135	23	2	8	2388	1763	10	1348	11	0	1	4	52
ENSG00000068650.14	8906.14	3965	1069.4	1660	6738.34	2026	748.63	1492	2545.65	1339.01	10160	1902.22	6577.4	7776.32	13096	1732	6708.77	3338.14	1221	9385	5885.81	2256.45	2425	9393	1465	827	2257.08	1262	2674.98	3056	10219	2093.78	1422.43	1831	2195	962.4	5160	6352	1431.25	2008	5214.03	5346.41	1553.92	10856.81	1564.04	3803	1292.03	4481	1704
ENSG00000068654.11	9835	12169	11452	8827	4164	5780	4808	5248	12754	5485	11056	6296	8302	10535	8320	4236	6467	9732	3301	6696	9356	7673	7166	7210	7173	4366	8566	5423	6089	5961	12297	3323	8196	8360	7817	4258	8244	8562	4794	6937	5188	8753	6845	14448	8240	4485	7516	6083	9582
ENSG00000068697.6	6320.01	5074	7138	5737	5935	10374	8388	12949	12376	3961	6615	5394	14407	10243	7012	16828	7653	10431	2550	6751	8664	12679	13584	6009	24744	3323	4043	10760	9968	8956	8461	2456	7983	10026	9570	3590	7204	8151	10268	11735	9398	12015	10032	5437	9699	10191	7605	15501.02	29058
ENSG00000068724.11	1779.03	851	2833	306	1086	1207	1915	999	3143	3294	2313	1698	907	1492	2066	4649	2479	3852	1519	1089	1703	4710	1464	856	4891	2112	931	2293	2515	1328	3061	417	2480	4250	1785	1428	2920	2278	2086	3846	1084	1291	2641	1982	2616	2232	4307	2710	5001
ENSG00000068745.10	2287	1958	2176	1532	2038	1737	1537	2534	1678	3758	4248	2081	3951	3017	4382	1599	4260	2012	960	2643	4372	2155	2285	1771	1234	1694	1809	2346	3620	1640	4148	1205	1579	2068	2412	2684	3632	1987	2195	2612	2324	3256	2125	2856	1963	2108	1215	2829	1867
ENSG00000068781.16	0	0	39.56	0	0	4.59	32.98	0	0	0	0	0	2.48	0	0	29.89	0	4.79	49.3	0	6.6	0	141.64	0	2.04	0	0	35.16	2.96	71.83	0	19.82	0	8.73	0	0	0	2.95	25.14	2.01	0	0	11.78	0	18.44	0	27.85	296.73	123.28
ENSG00000068784.8	2169	1249	2612	1593	1635	749	2399	797	2356	1276	1369	2515	4741	2470	1070	2218	1093	3360	1008	820	2841	1479	1390	1191	2478	1551	981	2132	2695	1081	2437	1264	1792	1941	1780	1786	1188	1902	1666	3899	1809	3745	2756	3647	4772	813	1315	793	3822
ENSG00000068793.13	25866	15763	14311	11723	25189	7059	21357	6463	17672	11655	16068	11321	32092	26632	18877	20572	14776	20405	3284	15407	26949	22871	8627	12339	12027	11773	11010	15298	28079	7779	19916	6545	14241	15957	17351	12396	18236	16030	15333	23520	17084	33382	24321	35521	26734	11732	13731	11941	13421
ENSG00000068796.12	2998	5739	4807	2187	5094	1079	3257	2125	4846	2693	3926	3993	10978	8190	2239	4596	4466	5209	1690	3358	7516	3727	2013	2880	3612	2829	3214	2490	4774	1500	4613	3746	3041	3647	3707	3292	3207	2626	4278	5993	5976	10330	6362	12014	7010	1211	2197	1864	4580.26
ENSG00000068831.14	28	33	518	0	26	3	1	9	0	0	26	1	313	64	58	79	0	0	9	4	45	14	20	41	3	0	26	100	11	59	23	18	14	43	105	0	0	32	12	10	271	185	34	128	21	170	51	53	2
ENSG00000068878.10	7275	15419	14132	7137	4271	2755	3995	3321	13859	6073	7689	13805	13390	8746	5654	4158	4976	7823	3570	6175	11310	5080	3603	6082	20828	5186	9037	6696	5894	4228	10028	3545	8570	10001	7244	6377	6094	11921	4184	11477	5626	12808	7622	17306	11893	2673	5902	3669	26625
ENSG00000068885.10	1359	1121	3004	2090.71	1438	2639.93	4417.32	2183	2536	1183	1390	1501	3958.26	2098	1392	5750.98	1600	3917	2434.14	735	2199.54	5709.92	3774	760.74	5774.68	1071	888	3581	3901.34	2190.62	2261	1531	3700	7872	2577.22	1395.38	1332.89	1380.03	6712.12	10733.69	1660.93	2772	7947	2545.67	7547	2887	3713.4	3847	8321.09
ENSG00000068903.15	5564	2789	1781	3560	3252	2019	2296	2259	3296	2843	2205	1973	5256	3964	4364	2687	2068	2521	1461	4709	3553	4236	2400	3524	1993	1565	2144	2643	3857	2191	2319	1475	1617	2608	3265	2141	1410	4830	2791	3569	5861	5174	2979	5398	2316	2455	2231	4639	2301
ENSG00000068912.9	3069	2150	6915	2049	2844	2478	9694	2592	4627	2207	3050	8150	7225	4776	2938	14668	3354	14899	1586	2451	3946	5893	2914	2719	6041	3791	2238	6879	7997	4203	4160	2321	2354	3776	5198	4360	2329	3000	5071	7350	5211	6023	9070	5916	8039	4048	2733	5598	7828
ENSG00000068971.9	2202	655	1047	1879	858	827	872	1547	1095	910	2320	1573	722	1308	2593	2499	2987	1521	435	1669	793	1416	981	2239	526	736	595	1238	1140	1819	2638	365	287	825	2234	1333	1402	2259	648	814	1242	1050	1036	1409	709	1788	696	2184	728
ENSG00000068976.9	26	13	147	26	24	218	87	229	126	56	18	26	36	51	275	760	0	257	93	0	55	189	258	0	37	15	24	11	87	479	13	19	25	43	62	33	0	0	34	154	15	15	91	27	37	853	68	1767	32
ENSG00000068985.4	0	0	0	0	0	0	0	0	0	0	0	0	0	0	0	0	0	0	0	0	0	0	0	0	0	0	0	0	0	0	0	0	0	0	0	0	0	0	0	0	0	0	0	0	0	0	0	0	0
ENSG00000069011.11	0	3	926	0	0	6	9	189	52	10758	1	5752	0	0	3	0	20	15	2	0	6	655	13	0	7678	5279	0	59	52	0	0	3	46	38	287	8006	6	0	106	261	0	0	149	1	145	0	65	1012	9591
ENSG00000069018.13	0	0	0	0	0	0	0	0	0	0	0	0	0	0	10	0	0	0	0	0	0	0	0	0	0	0	0	0	6	0	0	0	0	0	0	0	0	0	0	0	0	0	0	0	0	0	0	0	0
ENSG00000069020.14	10292	12115	1554	1172	6477	4277	1319	1878	2128	9769	4858	9043	6720	11342	1140	2055	5438	1708	1390	8655	11884	2000	5243	13194	1943	2709	10380	2584	3098	2897	5621	2935	708	3187	2834	4975	1777	8759	2694	3675	6061	6683	3972	10895	3191	1860	922	3406	3126
ENSG00000069122.14	48587	37747	155	22	59847	656	272	192	45	2	83	0	43828	58833	7	10831	16	12547	1293	78127	653	3	690	60555.99	0	0	9969	0	36	1271	27	891	55	18	821	0	32	20882	38	38	15393	48502	5	35108	13	371	5	48	0
ENSG00000069188.12	2	2	26	8	0	44	5	95	13	2162	463	1390	1	0	150	32	37	23	0	362	1	43	43	19	1946	683	0	34	11	0	396	0	36	62	1005	1653	22	0	96	12	1	0	35	0	31	2	1745	78	2197
ENSG00000069206.11	0	0	2	0	0	0	0	0	4	0	0	0	1	0	0	0	0	0	0	0	0	0	0	0	0	0	0	0	0	0	0	0	0	0	3	1	0	0	0	0	0	0	0	0	0	0	0	0	0
ENSG00000069248.9	5643	5423	6168	4068	5865	2122	5424	3296	6974	3854	5263	6667	12286	6648	5135	7365	5528	8658	2194	3678	9330	6070	3306	2879	5465	4307	3464	5077	7094	2888	5657	3507	4426	5812	5112	4272	5833	7392	7517	8729	6544	12219	7545	11134	8841	2784	3212	4174	6964
ENSG00000069275.12	26135	32189	47527	10601	27476	11991	29300	20470	37037	19114	12771	28832	45366	23871	11272	27133	25927	41832	15689	13405.23	44287	15213	18081	10959.94	40486	17022	19496	21912	33245	14545	18633	18962	24919	35825	28688	20736	21950	28415.15	26605	37981	21474	62915	28243	45494	39225	13744	24747	17070	55538
ENSG00000069329.11	14878	12328	15579	10182	12953	3872	11417	5283	15371	8288	13139	12103	23489	14100	7770	17686	13829	19770	9147	8597	19185	16067	5569	7114	12835	12718	7681	12044	13280	7268	18025	8804	9365	14373	11787	8325	13359	14534	15991	23046	14095	24870	21691	20402	21787	7383	9885	11206.09	17320
ENSG00000069345.7	5710	6068	8551	4811	8506	2386	7908	3696	9256	4389	6096	11156	16587	8422	3065	10168	5602	13467	4379	4404	14504	5881	3281	2856	6946	11377	4313	5965	9770	3911	8997	7090	5894	5862	5870	9712	7628	6135	9838	7911	8175	14082	8815	8936	10393	3651	4244	4926	8596
ENSG00000069399.8	1405	109	252	261	165	1075	210	2052	233	1072	649	88	79	211	2461	142	2236	251	35	1237	122	449	1244	1021	441	57	159	1223	218	965	754	38	198	239	1967	128	1669	988	389	287	51	87	154	293	128	1560	370	1898	484
ENSG00000069424.10	110	143	212	15253	150	432	228	546	154	256	203	119	225	185	1142	266	104	264	209	268	235	491	389	328	306	100	254	570	297	487	413	106	261	921	264	64	104	611	237	407	90	235	532	237	484	277	1184	692	475
ENSG00000069431.6	15	18	2423	26	25	466	89	158	4613	11	11	92	13	3	501	13496	49	4103	1718	210	6	2625	828	136	253	149	8	587	391	47	54	20	1215	705	512	609	11	0	2257	2319	8	1	9278	11	5121	18	1156	396	68
ENSG00000069482.6	148	23	0	0	2	3	2	485	20	147	271	34	6	4	56	0	489	0	0	43	98	42	26	56	5	11	35	44	8	7	437	16	24	0	952	17	1463	77	41	113	5	114	14	19	78	2	0	0	0
ENSG00000069493.10	69.71	77.29	196.12	256.82	84.09	35	53.82	89	71.17	25.54	211.57	83.99	208.78	181.04	156.83	166.76	134	51.14	163.56	68	69.69	98.01	97.96	168.53	288.15	137.48	39	59.49	62.55	12	243.25	48	107.54	277.04	119.62	95.87	47	16.95	175.19	304.37	72.46	67.46	220.93	65.4	201.51	15	139.41	139	469.35
ENSG00000069509.5	535	281	474	482	339	276	440	488	555	821	365	430	514	308	380	539	818	707	97	505	546	391	252	210	372	274	194	444	404	249	475	276	343	517	564	491	559	293	478	562	388	624	504	425	726	239	207	469.98	720
ENSG00000069535.12	0	0	34	0	0	127	17	4	0	1	63	1	8	0	817	44	174	11	0	14	0	210	255	5	265	4	0	79	218	40	103	0	8	37	44	7	12	0	213	767	1	2	39	6	66	2	3	47	299
ENSG00000069667.11	1102	4494	768	431	2622	1801	1730	1144	4225	297	393	2379	5567	3866	349	10964	174	3910	693	1858	4952	2628	2704	2595	4876	2151	2413	31	1346	2555	636	1389	819	2530	828	3258	11	820	1882	3169	3821	3814	3757	3178	3200	2023	2102	1535.97	6933
ENSG00000069696.6	0	1	0	0	0	0	2	0	0	0	2	1	0	1	0	0	0	0	4	0	0	1	0	0	2	0	2	0	0	0	4	0	0	4	2	3	0	0	1	0	0	4	2	0	3	0	3	0	0
ENSG00000069702.6	1792.39	2167	2890	4111	4446	12163	1528	7180	15926	74	793	217	5695	2303	1285	4082	971	4144	2384	1095	1786	16032	15815	1137	11531	169	1187	1888	263	5676	838	968	20601	57796	2201	105	443	1068	5426	17981	4932	3083	2491	5779	3519	6548	24827	4362	11799
ENSG00000069712.9	130	178	410	115	270	168	352	446	335	286	316	472	611	323	294	1066	512	441	80	132	267	731	248	185	539	220	135	228	275	172	407	77	270	677	414	492	211	71	1519	792	321	267	722	449	616	258	318	109	903
ENSG00000069764.5	0	0	0	0	0	0	0	0	0	0	0	8.14	0	2	0	0	0	0	0	0	1	0	0	0	0	2	0	0	0	0	2	0	0	0	0	0	5	0	0	0	2	0	0	0	1	0	0	0	0
ENSG00000069812.7	2164	2183	15	0	756	5	91	10	14	13419	1869	18978	1697	2207	49	69	712	70	9	1607	4162	65	0	749	1	11463	1733	0	398	48	1986	519	0	7	252	9650	377	2775	29	36	991	3747	4	1573	0	72	0	4	6
ENSG00000069849.6	11147	7319	3371	2826	8952	1767	3064	1342	3663	4768	1796	4593	4996	11591	2190	2136	2871	5229	980	6681	9834	1741	2301	6327	1877	2834	3834	2696	5588	4320	2396	1877	2006	2218	3993	2773	4093	8066	1258	2826	5288	8329	2368	7686	3112	3993	1666	3124	1886
ENSG00000069869.11	9666	6838	7642	2461	10552	2101	3192	2876	11688	1283	4985	18236	11371	14327	2213	8083	3550	10001	884	4720.88	8081	6793	2554	4262	4498	7308	4356	7167	6729	4252	6207	4396	3762	5745	5051	12465	4843	12897	7026	10792	7138	9898	12457	13293	10823	4335	6199	4454	6333
ENSG00000069943.5	919	623	922	1162	377	269	704	343	924	510	330	437	679	383	464	844	673	862	76	371	582	833	336	253	1354	325	347	1132	617	465	554	286	513	963	643	401	578	1186	512	1214	349	958	838	869	913	515	633	535	1535
ENSG00000069956.7	5999	6201	16632	4825	4895	2351	8799	3864	9134	12566	7678	43884.98	15657.01	7138.88	4229	10860	6168	16161	3077	3973	8969	6596	3699	3199	10982	23555	3385	7694	11378.99	4203	9939	4958	5659	5129	8618.96	30159	7639.4	6487	10077	9684	5622.31	11272.82	17095	11055.8	16177	3662	6327	5930.02	13274
ENSG00000069966.14	2388	791	3297	1147	1257	945	1802	811	1817	2071	2083	3610	5867	2311	2662	2971	1647	3515	222	1125	2074	2581	1295	762	1091	2921	693	2336	2214	684	2765	1227	1286	1704	1638	3536	2175	3002	3028	2670	3487	4281	3130	3541	2811	812	1563	1456	1510
ENSG00000069974.11	817	770	636	13128	898.27	729.58	439.85	1368	647	321	449	1195.13	1203.89	1334.41	558	750.34	417	1044	414	778	1076.45	1063	926	791	1263.62	454	449	771	954.28	660	607	312	332	606	1684	2004.05	509	1052	1169.61	1984.54	1260.24	1464.14	1502.76	2746.33	1087	465	519	506	1340.06
ENSG00000069998.8	2365	1675	1061	1423	2327	1508	1674	1486	4530	3546	2596	1887	3262	1948	2730	2427	3922	3574	553	1671	4586	1592	1716	1533	1427	2786	1739	1806	3274	2262	2739	1470	1607	1010	3738	2381	4136	2909	1086	1423	2485	3558	2086	2572	2548	2986	1081	3407.12	1247
ENSG00000070010.14	2825.99	3658	2066	2396	5622	651	3493	1053	4008	1421	1913	3038	5914	4246	1443	1980	1975	4340	642	2108.99	8441	1681	996	2087	1818	2650	2760	2264	4355	1463	2148	2127	1724	1729	2626	3150	2519	3387	1873	2955	3904	8469	2073	3837	4437	1103	1112	988	2197
ENSG00000070018.4	2477	7747	7839	5392	4867	3448	7991	4148	4094	2114	3923	6190	17990	13826	5543	9838	4111	11249	11394	2888	11095	7536	5550	3619	8802	4417	6495	3667	10700	3768	4386	5414	3302	7299	3265	4470	2438	3210	9160	10083	10615	13712	11836	16308	11748	2398	4050	3117	10451
ENSG00000070019.3	0	0	0	0	0	0	0	0	0	0	0	10	0	0	0	0	0	0	0	0	0	0	0	0	0	0	0	0	0	0	0	0	0	0	0	1	0	0	0	0	0	0	0	0	0	0	0	0	3
ENSG00000070031.3	0	0	0	0	0	0	0	0	0	0	0	0	0	0	15	0	0	0	0	0	0	0	0	0	0	0	0	0	0	0	5	0	0	0	0	0	0	0	0	0	0	0	0	0	0	0	0	0	0
ENSG00000070047.7	4858	5128	4268	3132	5194	2922	4701	3933	7311	4480	5418	4906	5696	6276	5938	4741	5007	7599	3452	3352	7325	5150	3071	4718	2926	3770	4655	3196	5378	2515	6857	2679	3460	5146	4105	4929	6668	3058	3558	4537	3857	5512	6626	7338	8738	2207	4181	3449	3905
ENSG00000070061.10	4355	3626	6544	4054	4454	1655	6575	1510	7880	5820	3717	10016	9674	8428	3395	7752	4123	14043	1611	3041	8175	6460	2204	1965	3577	6620	2686	5692	6985	2303	5450	4217	4328	3246	4211	6340	4338	5116	6357	8489	7131	9090	10185	9365	11442	3085	2650	3116	5249
ENSG00000070081.11	2596	2457	3283	1129	3494	2153	6481	1239	2231	1031	941	5381	2993	2624	667	4888	1268	3927	5523	2347	6191	3583	3362	1781	8703	2116	1448	3368	5747	2562	1332	3006	1807	3539	3280	3462	1003	2005	6984	8184	1623	3072	10889	4347	6615	2384	1903	4039	10226
ENSG00000070087.9	685	4086	8982	7581	1593	2813	13954	4106	14092	4950	4441	20135	963	1753	5369	12017	5784	15405	2998	2847	10862	14383	4305	3100	9047	13998	2306	10640	15907	2313	5749	4644	6616	7121	8552	16784	7687	1882	9779	21719	313	597	17806	2612	24414	2543	5287	7047	11170
ENSG00000070159.9	19	33	30	1223	8	691	1996	198	635	3404	6351	6592	2453	706	5940	697	7953	726	12	681	13	48	891	265	2014	3102	62	26	817	596	8341	2	322	170	908	4564	5714	92	341	15	692	884	39	845	83	471	109	53	2501
ENSG00000070182.13	0	19	6	0	12	0	5	0	42	0	32	0	9	11	169	9	467	8	0	20	7	7	0	23	10	1	0	0	40	1	80	0	0	4	0	2	91	0	3	2	7	54	5	9	4	0	0	0	14
ENSG00000070190.8	0	0	0	0	0	0	1	0	0	1681	1627	7107	0	0	3	0	1481	0	0	0	0	0	0	0	0	1849	0	0	0	0	2220	0	0	0	21	3824	469	0	2	0	0	0	0	1	0	0	0	0	0
ENSG00000070193.4	0	0	0	0	0	12	171	1867	0	0	1	0	0	0	0	0	0	0	7	0	0	325	5	0	111	2	0	0	1	17	7	0	3	49	7	0	0	0	7097	106	2	0	18	1	43	0	69	0	207
ENSG00000070214.11	6897	6869	10537	6873	10406	18691	22030	7219	24921	4235	3674	12459	16583	6593	6239	28292	5606	20514	6982	6848	13161	16504	25098	4251	9081	10182	5455	8115	12837	18532	5214	7682	27670	14578	8278	10351	7112	14544	14694	22777	4706	12461	17956	15577	19467	16792	8136	19242	13502
ENSG00000070269.9	1250	981	1857	889	722	870	1107	1684	1056	684	1391	2854	1805	1895	1770	1790	1052	1733	379	1171	1744	1900	1239	990	1870	1656	685	659	1430	935	1956	747	835	1737	1354	1981	823	813	2035	1859	1447	1362	2411	1510	1319	1160	913	1881	2543
ENSG00000070366.9	7239	4400	5177	2370	3081	3357	3292	3895	3911	3134	4863	2627	5895	5436	6274	4404	3352	4439	2614	4428	5278	6054	4088	4096.77	3598	1596	4174	3408	5853	3442	5028	1548	3039	4432	6584	2796	3863	5583	3737	5444	3940	5932	5007	8399	4882	3655	3528	3266	5081
ENSG00000070367.11	10713	13615	16021	8675	11546.99	3117	9265.98	3814	10554	5106	8107	9470	19083	11969.98	4309	14597	7937	23367	4409.94	9222.97	18897.94	8793	4082	6911.01	11365	6686	6671	7366	11845.94	5672	10962	8140	5992.99	9250	8024	6587	7511	10384.23	9383	13406	10293	19131	15759	19984.99	17342	5033	7924	6615	14404.99
ENSG00000070371.11	578	435	1507	604	628	333	532	272	2038	692	3142	1390	946	952	3831	2605	536	1871	381	301	881	1389	441	671	1124	1820	405	1171	2338	900	4286	340	957	1202	1240	2718	676	308	1884	1395	687	859	2075	843	1629	951	807	757	988
ENSG00000070388.7	0	0	0	0	6	0	4	0	28	0	0	0	1	2	22	0	0	0	2	0	2	0	0	8	2	0	0	0	2	0	0	0	0	0	0	0	0	0	0	9	1	0	1	1	6	0	2	0	0
ENSG00000070404.5	4590	315	2613	2750	447	1536	1356	2922	10090	11082	15445	8452	385	1136	46607	3859	17803.99	3337	2157	4215	2446	3148	2254	5491	1411	9651	1074	5484	9748	3293	20903	598	1500	533	16522	6887	9947	2393	2676	807	400	447	3941	373	1021	4665	1754	19958	1024
ENSG00000070413.14	5506	5384	6967	5473	6502	4108	4307	8330	5843	6705	11399	10856	9981	10253	19966	6665	8397	6864	2369	6709	8654	9210	4970	5706.09	4007	7444	4424	6735	7126	4330	12163	3008	4850	9295	7069	9561	7103.62	6478	6325	8905	7362	9837	7191	13211	7373	4572	5491	7502.49	4760
ENSG00000070423.13	4543	2013	1001	1564	1010	827	740	1743	3693	4866	3656	2080	1020	990	5041	927	4395	1825	261	2824	1608	1042	1123	2190	691	1754	1774	2757	1533	2063	3423	771	1294	1126	3940	1362	6419	4142	574	924	1393	1703	495	2052	1136	2302	1248	2576	684
ENSG00000070444.10	995	503	700	925	406	931	754	1556	1304	1153	1550	697	520	882	3389	851	682	652	671	964	477	1397	1312	1020	1027	420	626	867	563	646	1411	88	714	1578	1213	542	602	725	680	1308	488	549	1383	934	974	867	1188	1402	1256
ENSG00000070476.10	1294	1752	1443	1533	1180	944	1691	1363	2002	1286	3140	2671	2381	2112	3607	1856	2118	2036	448	1304	2258	2497	1442	1515	1868	2158	1592	871	1741	1100	4032	894	1316	2063	1373	2476	2202	1376	1794	2135	2138	2314	3242	2597	2829	806	1804	1889	1914
ENSG00000070495.10	2146	999	1576	598	1538	516	1110	1500	1785	1181	1077	1212	1607	1545	856	2532	2121	3729	542	1334	1870	1202	813	988	791	1088	527	1206	2089	1386	1701	757	546	851	1956	1180	1743	1868	1012	1288	1218	1482	1377	1586	1498	1362	1297	1222	989
ENSG00000070501.7	772	389	757	1429	690	182	787	682	524	1003	1254	1421	2461	721	1056	903	1879	1258	262	414	902	583	348	314	315	843	426	676	1353	281	1969	426	282	409	828	771	1648	518	906	773	1112	1619	933	1110	840	147	238	882	422
ENSG00000070526.10	0	0	0	0	0	0	1	0	0	523	0	73	0	0	11	0	10	0	0	0	16	1	0	0	0	208	0	0	10	11	0	0	0	0	28	792	17	0	0	0	2	0	0	0	0	8	0	0	0
ENSG00000070540.8	2156	1603	3039	18397	2115	2724	7635	3203	4111	802	2816	5243	3871	2962	2603	7780	915	5197	980	2471.8	2894	14501	3205	2052	4588	2982	975	2751	7942	3957	2275	1053	5592	5852	5939	3518	739	1172	7450	9002	5178	4540	8754	3347	4775	4646	5459	4961	3805
ENSG00000070601.5	0	0	2	0	0	0	1	0	9	4	1	9	3	0	3	0	4	0	0	0	2	0	0	0	2	1	0	7	0	0	5	0	21	32	0	9	0	0	0	0	0	0	6	0	0	0	0	0	4
ENSG00000070610.10	2805	6074	2438	3119	6103	1002	1739	1593	2174	2222	5261	4568	10014	9950	5138	1733	4488	2950	1246	2957	8693	1592	1323	4705	1335	3669	4905	1814	3880	1035	6493	5051	1399	1536	1952	3099	3688	5823	2409	1923	6415	13770	3072	11606	2658	1171	1272	2447	1630
ENSG00000070614.10	24053	20671	16854	6995	10829	8021	4048	8533	12959	18545	23895	5313	7639	14696	39223	6896	10341	13937	2119	35008.02	21568	17150	9896	28933	9803	3163	9471	10180	10055	11351	27150	2473	6327	14599	17840	7025	13026	15785	4506	13701	6399	10775	6073	23699	6444	10712	24237	16928	9349
ENSG00000070669.12	654	557	3089	291	295	628	842	1402	4716	1229	12021	12760	275	525	4740	1797	2856	3450	774	281	383	2856	575	795	3342	8924	540	6560	4988	4000	15564	1277	1722	816	11599	16923	4552	868	4705	3341	468	325	7707	582	5065	4716	1904	5211	2944
ENSG00000070718.7	1365	1441	1401	2883	2166	667	3671	829	1402	869	1838	1494	2263	2469	1204	5002	1369	2842	1321	1705	2427	2102	703	1639	972	1492	889	796	4572	918	2054	1398	1301	1353	923	1409	1419	775	2453	2197	1174	2234	4199	2470	3910	897	1012	1103	1235
ENSG00000070729.9	0	4	0	0	0	0	3	0	0	2	0	12	0	1	4	0	24	2	0	0	4	0	0	0	0	7	4	0	4	0	0	0	0	0	0	9	1	0	0	0	0	0	0	0	0	0	0	0	1
ENSG00000070731.5	80	8	64	5753	146	0	252	41	22	2838	486	2939	7	25	268	43	226	31	0	68	3	90	79	35	42	1916	3	146	303	90	719	19	0	24	128	2740	104	0	33	20	1	12	80	20	40	77	42	20	80
ENSG00000070748.13	0	0	0	0	0	0	0	0	0	0	0	0	0	0	0	0	0	0	0	0	0	0	0	0	0	0	0	0	0	0	0	0	0	0	0	0	0	0	0	0	0	0	0	0	0	0	0	0	0
ENSG00000070756.9	21803.95	18266	10279	5172	12875.94	36031	12523.94	46766	19690.97	18602	52848	37719	33032.99	29523.93	45317	15522	18489.98	16468	12647	31354	23591.67	22067.99	46144	24011.76	27169	19116.98	13252	16858	19877.94	30383	64481	4994	13243	15235	26775	24512.92	20556	22132	19036	29084	13503.97	24633	16659.97	52608.09	14010	24607	9987	23780	28313
ENSG00000070759.12	312	170	171	1485	316	228	143	376	20	334	165	294	910	251	330	313	302	125	305	84	209	252	193	165	442	155	148	61	194	224	270	59	99	299	204	172	112	31	309	270	541	881	146	758	95	157	213	228	446
ENSG00000070761.3	2490	1624	1162	1217	2316	580	1355	884	1900	1584	2087	1415	2871	2174	2275	1685	1747	2958	244	1287	3238	906	912	1306	758	1292	998	1508	2388	1174	2576	1152	790	833	1883	1254	2505	2129	1152	1227	2215	3542	1378	2474	1826	1577	750	1429	1125
ENSG00000070770.4	4923	7689	2872	1683	6370	3216	1698	4331	3275	2532	5829	5054	6174	7920	5731	2428	2113	2748	1459	4341	6394	3167	3920	4352	4386	3711	4901	2361	3008	1695	7621	1941	3121	3612	3741	3550	2589	4856	3413	4906	3409	7363	3597	12863	3441	1752	1834	1994	4380
ENSG00000070778.8	1002	1377	2462	1041	918	1169	1803	896	2149	808	2366	1327	1810	2644	3359	1312	1348	1684	988	1824	1582	1976	1517	1908	3882	1158	1179	1824	2147	1145	2619	442	867	2563	1523	1157	1694	1617	1988	2721	1371	1283	2116	1460	1758	1036	2091	2557	4923
ENSG00000070785.12	1767	1284	1866	1088	1436	522	2600	620	3288	1652	959	1186	1266	1645	635	1910	1419	3875	1040	935	4002	1519	663	532	1137	1132	786	2619	3390	1089	1207	1409	1851	1442	1689	868	1857	1963	2000	3394	933	1889	2573	1567	4176	816	865	1166	1542
ENSG00000070808.11	0	0	127	37	0	0	3	53	100	0	0	17	0	1	61	47	0	7	0	0	0	395	0	0	74	14	0	16	3	0	1	0	27	500	2	1	0	0	105	138	0	0	176	0	179	0	63	2	95
ENSG00000070814.13	9006	3075	3254	2040	2352	1695	1322	2750	5325	6896	4525	2733	2457	2620	3675	1886	7546	7418	646	3632	4049	2338	1982	3732	1177	1369	2710	5843	2105	1999	5919	1677	2614	1530	4914	1294	13570	7430	2136	2455	1580	3116	3581	4815	5508	1970	1996	2828	1759
ENSG00000070831.11	36045.95	43456.81	38549.66	18993.48	58221.22	6555	29889.8	7913.98	43273.76	19215.98	16331.98	41882.71	86834.6	33801.36	16363.99	34879.89	23915	50428.5	9915.72	20958.94	82337.05	24037.65	10136.98	14126.98	29924.61	34104.72	30095.63	24351.99	58930.33	13089	22809.9	41570.94	20872.55	26720.54	25307.99	49429.89	28816.99	34802	24074.7	38626.36	55738.28	116695.16	26997.04	37816.26	40636.99	15806	18543.77	20756.9	37883.76
ENSG00000070882.8	6052	4780	6059	2135	2926	495	1494	233	1901	3456	7178	4143	4510	5931	2681	3286	6615	4416	1598	3394	5744	7148	615	2833	2218	4053	3484	5310	2107	885	8477	2083	3548	9527	3575	3017	4770	4580	5044	5399	3157	6592	3995	6024	3795	1083	7375	375	4187
ENSG00000070886.6	0	0	0	5	0	0	0	0	0	0	0	5	0	2	0	0	0	1	0	0	0	0	0	0	0	0	0	0	0	0	0	0	0	0	0	0	4	0	0	0	0	0	0	0	0	0	0	0	0
ENSG00000070915.5	0	0	0	0	0	0	0	0	0	0	0	0	3	0	2	0	0	2	0	0	0	0	0	0	2	0	0	0	4	0	15	0	0	0	0	0	1	0	0	0	1	0	5	0	0	0	0	0	0
ENSG00000070950.5	1594	1566	2179	1031	999	291	962	644	2785	1011	664	844	908	1489	713	1278	1258	2195	229	541	1776	519	515	624.32	903	644	805	1093	1410	584	1027	838	1228	970	1423	559	2231	1313	588	1612	641	1773	1108	2007	2720	445	766	677	1399
ENSG00000070961.10	2117	4987	29715	1625	3381	2092	3999	9691	20435	2506	3542	24834	8162	4934	3778	20490	2322	13103	8725	3926	5891	9993	3192	3692.53	7453	8849	2456	18393	6005	3261	4887	3881	14697	9060	11355	14432	2738	2707	15946	10524	2546	4118	55596	5963	60575	2645	10743	6138	12293
ENSG00000070985.9	0	0	0	0	0	0	1	0	0	0	0	0	0	0	0	2	0	0	0	0	0	0	0	0	0	0	0	0	0	0	0	0	0	0	0	0	0	0	1	0	0	0	0	0	0	0	0	15	0
ENSG00000071051.9	2624	2527	1481	3738	3307	1831	1933	2484	1219	3515	5813	7403	6124	5644	5140	2826	4199	3270	554	2773	4705	2386	2080	2228	1486	7985	1843	2423	5712	1491	7612	1300	863	1574	3671	8031	4522	2044	2653	1622	4567	5542	2742	5086	2095	1802	1578	4031	2138
ENSG00000071054.11	29105.41	38043.49	13013.05	5060.94	38929.58	19170.1	67391.66	10738.98	37743.88	7437.83	16855.77	16347.89	40318.02	36230.67	12509.52	23268.48	16201.55	82256.92	14620.3	31715.49	92968.55	32022.68	25519.58	28863.14	22811.61	14535.31	20961.74	21564.73	40617.48	13259.15	21799.19	35100.72	20005.27	16581.32	20485.94	14197.48	13472.13	19541.63	42082.42	39702.64	16824.91	50362.81	38042.97	50795.19	50178.31	10193.6	16346.19	11477.53	38807.09
ENSG00000071073.8	6422	11754	22	201	7866	74	465	56	61	223	788	1252	2737	5676	1028	68	1074	34	34	3685	19494	15	43	3719	39	982	6791	0	20	224	974	4631	2	64	109	1450	449	8513	55	63	1244	5020	124	6080	25	9	46	3	65
ENSG00000071082.6	15455	10085	13618	5934	21993	13747	24020	22892	23302	18829	16928	29589	44258	19488	16040	34084	25690	33553	7561	12502	61799	15795	18092	6876	19492	39844	12645	14768	50129	15293	21747	6256	23013	17133	30404	33904	19279	8981.73	30332	22212	38352	36353	21224	18374	17099	18419	3753	33084	16212
ENSG00000071127.12	55268.06	36469	43449	16661	51415	7300	47361	7479	41567	16589	33332	35413	53383	59962	37389	42610	25945	95386	2805	28621	84043	35603	9537	25670	21262	27644	28703	36103	93436	27546	38245	25049	19569	22860	46169	31657	43213	46509.55	29412	34132	33459	67380	48388	67611	52018	36594	33720	37649.81	22132
ENSG00000071189.17	2568	4782	7490	5074	4083	2742	6643	4271	6440	2510	3468	8722	13761	6328	3406	10859	2236	7288	4395	2087	7181	8312	4012	2557	9822	5749	3041	5369	7057	3253	4304	3180	5357	10273	4125	6403	2139	3044	8714	12603	7317	8072	12257	9122	11088	3549	4809	4544	12497
ENSG00000071203.5	0	0	0	3	0	0	0	0	0	0	0	0	0	0	0	0	0	0	0	0	0	0	0	0	0	0	0	0	0	0	0	0	0	0	0	0	0	0	0	0	0	0	0	0	0	0	0	0	0
ENSG00000071205.7	3021	1893	3946	1321	1904	988	3334	1512	4275	613	1563	1390	1828	2633	1790	6718	1137	5248	1771	1958	2255	4190	1585	1198	4139	1041	1394	2463	5224	1842	1715	1238	3310	4356	2573	1318	1258	2431	3661	6537	642	1918	4416	1650	5645	1521	2759	4394	4754
ENSG00000071242.7	9327	18119	1580	7009	14657	29676	8192	10642	13386	2493	8039	5696	56497	38691	11739	13093	3487	8495	3380	14922	17477	17373	35997	26182.03	21954	4054	21610	6657	16580	36212	10928	6670	7830	16246	11253	5050	3346	6044	19659	12540	34756	38392	13159	53123	6585	37384	11797	39711.99	29920
ENSG00000071243.11	859	1064	935	463	1181	339	693	710	642	218	627	951	3168	1366	458	760	607	1282	207	491	1526	539	325	533	976	741	714	363	791	341	903	768	535	850	385	452	576	1168	865	1065	2018	2374	1035	2369	1315	510	507	386	1083
ENSG00000071246.6	2478.57	7819	494.8	461	22599.22	1672	1252.74	1157	766.36	276	1473.99	1	2172.27	10376.82	4059.6	601.77	624.79	570.28	1067	3520	28629.63	779.49	1826.71	11927	435.99	0	6997	1166	1054.71	2136.61	1965	7552.97	270	599	1793.57	2	536	913	1088.08	722.67	3397.98	2278.27	1201.89	21135.65	632.52	1219	187	1363.49	378
ENSG00000071282.7	466	665	4162	445	1387	870	852	540	1131	314	4968	140	1311	1312	2408	7803	2408	2584	535	593	621	1240	1190	328	7048	90	635	2953	10212	1995	6977	314	1032	1296	9143	46	1913	701	2577	486	1830	1542	1355	1194	468	1852	10042	9827.1	10382
ENSG00000071462.7	2157	1000	1257	1201	1620	1104	2450	1326	2488	2537	1485	3217	2309	1340	2599	1773	2289	4745	734	1462	3336	1442	1234	1353	1474	3110	766	3254	3175	1765	2599	1118	840	1191	3110	3855	3043	2374	1308	2293	1391	2921	2007	1197	2818	1583	866	1814	1579
ENSG00000071537.9	10153	15267	19750	12321	13106	8507	23715	9233	20694	4579	18632	53974	31764	23453	11826	56200	7556	31980	15325	11310	24346	25796	11187	10831	25489	31300	11925	11741	23737	13447	25371	8748	10986	14410	17301	30118	6157	12328	38338	27085	20155	27829	65568	27939	32365	12449	13551	12900	32418
ENSG00000071539.9	5633	2283	1692	1196	2780	168	2033	434	4168	2852	657	102	766	1518	409	443	4981	6962	74	652	4145	403	119	794	711	94	916	4098	1215	765	717	2202	2047	470	2882	69	7785	5660	211	3143	279	3419	1448	4023	7073	475	211	183	1085
ENSG00000071553.12	5477	4019	3589	5661	5141	1581	3836	3374	2853	2198	4121	3326	6746	7532	6821	4158	2327	4352	1032	5929	5882	4483	2776	6954	1857	2671	3504	3720	5409	3011	5889	2384	1923	3527	3906	3866	1899	6014	2958	4357	5949	7761	4333	6281	3621	2582	2175	3473	2446
ENSG00000071564.10	10590	7447	3465	2098	5174	2863	2343	6929	6250	8701	9267	5088	5577	6246	14391	2783	11856	5418	775	9438.98	9579	4753	3282	8864	2209	3836	7960	5998	6254	4081	10648	2146	3468	3992	10443	4538	10814	9010.88	3602	4564	3867	7263	4406	8332	5988	3305	3431	5204	2579
ENSG00000071575.7	3034	2015	2446	22085	1627	3951	4508	9632	1773	964	1717	484	8682	6449	2774	14456	732	9685	2191	1610	2033	1741	5371	2249	1657	622	3852	1029	8100	9910	2003	310	657	1055	5040	655	614	1640	4652	1168	13319	10812	2199	7766	820	11063	3721	12423.53	4888
ENSG00000071626.12	7088	4558	4125	2548	6283	1068	4126	2601	5790	4591	4218	8511	8223	5731	6589	3914	4531	8163	834	2766	7117	3656	1309	3073	2852	8012	2970	6846	6050	2346	5519	2862	3248	3177	6291	9723	9835	5917	3139	5451	4540	10833	5693	7884	8841	2355	2628	3022	2986
ENSG00000071655.13	15693.01	6215	4944.66	4759	10408	4628	7541.76	7649.16	7512	9436	9216	8651.35	12036.5	13666.74	11960	6536.5	10214	12528.77	2676	6850	15197.2	9567	4993	6416.42	3590.94	7221.37	5556.65	7689	11356.31	6030	10354.32	4769.56	4771	5848	10883	5606.95	13589	9869	7741.63	9024	11615.74	15694.44	11616.28	20625	13326.21	4321	4207	10364	4330.2
ENSG00000071677.1	0	0	0	0	0	0	0	0	0	0	0	0	0	0	0	0	0	0	0	0	0	0	0	0	0	0	0	0	0	0	0	0	0	0	0	0	0	0	0	0	0	0	0	0	0	0	0	0	0
ENSG00000071794.11	2468	2365	6955	5110	3604	2881	10902	4499	6032	2179	2615	2645	5900	5161	2670	15547	5074	11813	3491	1376	5488	5853	4503	1504	4882	2074	2078	4038	8743	3369	3736	3417	4169	4938	5272	1788	3805	3175	8629	10029	3100	4886	12811	5705	10335	2823	3463	2767	8260
ENSG00000071859.10	2550	1126	1260	908	3355	1106	4657	1415	1911	1102	2696	2174	3238	4612	1766	2949	2878	4751	1384	2392	5275	3193	1713	2249	924	3515	1051	2210	6213	1503	3482	1621	1084	1420	2005	3560	2098	1320	3809	3230	2618	3678	4317	2902	3881	1878	978	2692	1281
ENSG00000071889.12	1438	792	1147	1015	1203	1043	1520	1522	2244	2053	1381	1414	1371	2362	3243	2135	1296	2146	418	1173	1856	2082	1740	1083	1008	1607	749	2075	2401	1637	1716	595	1181	1128	2115	2002	1647	1711	1725	2306	1407	1418	1924	1760	1889	1858	934	2316	1186
ENSG00000071894.10	9193	6448	4414	2359	6734	3687	3618	5089	5666	4694	8789	2732	8873	10070	13444	4031	7797	9845	1885	7710.44	11246	7521	3939	8519	3600	1888	6774	7096	7732	3583	10897	3152	4114	4093	8702	2115	9819	8285	4328	6783	6624	9889	7517	13260	7232	4462	3502	5236	4155
ENSG00000071909.14	0	3	8	34	0	0	7	0	6	403	58	50	6	1	0	35	58	5	8	0	0	46	2	0	11	6	7	0	4	3	122	3	10	208	7	123	268	0	50	13	0	1	12	1	4	0	13	0	7
ENSG00000071967.7	1383	2481	20543	6188	3760	31971	30594	15157	13563	1477	727	1224	4439	3095	8482	48811	846	15150	31393	1516	4011	63482	46954	1661	49180	1874	2289	8089	25330	17883	1147	2332	14764	55461	6683	996	392	1402	54689	35639	4237	2817	28641	3122	14406	21804	40001	51390.51	78874
ENSG00000071991.4	0	0	0	1614	7	4531	153	1	0	1	0	2	5	4	0	233	0	186	0	0	0	0	6253	8	8	4	0	0	504	1675	0	0	0	0	15	19	0	0	0	0	3	4	3	1	0	748	1	15	4
ENSG00000071994.6	4034	3099	3305	1920	2689	2023	2702	2497	4979	3632	4691	5357	6550	2513	4432	3351	5000	4261	1888	2176	4875	3241	2864	2026	3016	3111	3061	3659	2977	2159	6280	2311	2771	2689	3114	2493	6283	2931	4426	2842	3880	5963	3394	4152	3319	1610	1911	3447	3092
ENSG00000072041.12	90	157	72	5977	239	119	4	6369	11592	1710	1246	13755	264	6982	269	141	201	78	611	264	43	3381	137	726.49	6	10134	178	1229	13	110	1920	27	9918	2165	2306	3458	305	362	108	4870	1788	1503	8020	89	12883	120	893	96	13
ENSG00000072042.8	6114	5846	14718.08	17427	7310.02	2349	10259.32	3745	9808.89	7444	5448	12860.28	8731.17	7977.95	5643.76	12023.77	6850.59	16245	4105	4030	10104.18	6846.42	3303	3255	5678	8239	3489.33	12950.96	14166.24	6732	7186	5881.35	7157.23	6458	11242	11470.83	8849	6775	9546.95	13120	10420.48	14833.37	17879	11277	22346.5	5423	4688	6130	6398
ENSG00000072062.9	4387	1870	1733	1832	1567	2792	1683	2441	3355	2151	1672	558	2023	2504	3300	1283	1855	2516	281	3053	1921	1905	3270	2716	1814	472	1617	3787	2805	2870	2063	493	1688	1960	4084	465	2102	5701	1184	3071	1226	2459	1961	4057	2470	2290	1324	3342	2002
ENSG00000072071.12	191	561	266	920	147	3007	394	2657	243	1963	2324	614	1415	1918	4076	472	781	283	1660	1096	506	828	3273	1208	602	335	849	308	935	1220	2208	67	252	646	996	872	318	17	585	343	1242	1012	307	1475	135	1319	541	1627	628
ENSG00000072080.6	0	0	0	0	0	0	0	0	0	0	0	0	0	0	0	0	0	0	0	0	0	0	0	0	0	0	0	0	2	0	0	0	0	0	0	0	0	0	0	0	0	1	0	0	1	0	0	0	0
ENSG00000072110.9	68502	26995.76	72167	5634	19694	16209	16300	17983.4	18913	37044	73656.67	20709	26524	49641	75751	34106	62506	55510	5065	54100	38346	27614	18172	47844	23086	15521	35252	51679	70322	30580	84995	10744	8309	15562	70571	10639	74623	49068	16523	23628.66	24082	27214	45942.01	45821.17	41595.41	36551	42211.04	42768	24571
ENSG00000072121.11	6884	6640	6203	22941	4081	2361	3167	2341	5043	1767	7457	4207	7272	7224	6321	5856	3758	4313	3782	4362	5487	6150	2820	5295	6706	2646	4731	3825	3655	1551	7911	2804	4909	8857	2826	3531	3094	6480	4947	7703	5601	6951	5924	8255	6073	1863	5549	3069	8611
ENSG00000072133.6	19	72	1499	5	24	110	71	41	537	300	474	744	300	109	196	246	204	266	383	22	130	236	37	13	272	487	54	807	167	31	535	57	121	242	340	751	83	103	527	381	189	148	1482	162	1995	1	208	23	608
ENSG00000072134.11	3240.1	2508.08	2737.54	1128	2623.03	1836.23	3027.99	2051.05	3803.39	2909	2023	1954	3106.02	4247	3213	2120.16	2094	3477.19	706	2792	3718.16	3156.01	2479	3705.01	2351.24	1252.08	1883.02	3028	3953.9	1751.01	2083.02	1208.01	2147.24	2764.26	2481	2178.02	1718	3055	2362.7	3160	2779	3173.22	3373.25	3560.28	3232.16	1752	1492	2791.03	3176.06
ENSG00000072135.8	1654	1254	957	1770	1511	1116	791	983	2035	728	1654	722	2441	1710	1961	554	1380	1079	438	743	1008	682	1077	948	1412	887	1268	1293	906	1095	1508	469	1408	1448	1205	810	1509	1206	549	977	3062	2761	636	4353	967	780	772	1694	1239
ENSG00000072163.14	3676	979	2036	93	2434	43	258	1	155	0	236	2	742	916	1126	403	51	286	260	1243	1277	117	20	731	543	16	999	132	843	141	155	438	20	703	111	1	21	2499	56	36	365	524	131	2184	36	553	576	3695	617
ENSG00000072182.8	1	2	2	0	0	0	2	46	0	0	0	16	0	0	0	61	0	1	0	0	1	33	0	0	5	13	1	0	5	0	0	0	4	17	0	3	0	0	4	11	0	1	34	0	20	0	2	26	1
ENSG00000072195.10	26	17	4594	18	18	994	971	803	1614	780	461	371	1	10	2846	1957	1729	853	2065	109	103	2475	1198	131	2972	150	5	1409	1406	630	794	35	1185	4456	297	205	464	0	1354	1863	6	7	9046	5	5753	352	4636	3636	2419
ENSG00000072201.9	195	54	22	0	145	408	4330	86	336	500	213	221	737	864	124	387	387	216	55	457	380	83	671	131	6185	158	45	1	794	392	218	234	226	1331	166	350	290	369	78	154	846	715	30	368	18	306	871	516	8081
ENSG00000072210.14	3209	2079	2710	4397	2913	4625	10087	1586	6092	9320	1264	8517	5451	4060	1994	3983	1447	4142	3716	1271	4561	4307	7572	1124	18405	10366	1312	1706	3789	2854	1675	2630	2882	12227	1505	13358	2476	5387	3828	3440	8882	5052	2279	6528	1571	2500	6575	3607	24625
ENSG00000072274.8	23904.06	25586	17938	20410	14919	9827	18389	5753	46672	25749	12370	31382	26612	24853	7893	45919	18124	61085	8210	9127	39563	23682	14626	11787	20684	15002	17123	10095	29458	18079	18309	12005	20577	7092	30043	5579	22747	14808	24212	33102	19398	39448	58848	37850	62288	20028	9550	12231	25218
ENSG00000072310.12	12870	4516	6974	10069	3060	3903	3378	6862	9957	30428	9167	4369	3447	2973	21680	1589	7159	4176	3151	7804	2242	11570	4602	8968	3967	3816	3350	14017	4758	9127	10817	1211	7221	21446	16043	4986	7801	5666	3753	24147	2147	5653	7482	9425	10566	4910	14433	16487	2846
ENSG00000072315.3	0	0	0	0	0	0	1	0	0	0	0	0	1	0	0	0	0	0	0	0	0	0	0	0	0	3	0	0	0	0	0	0	0	1	0	0	0	0	12	0	0	0	0	0	0	0	0	0	0
ENSG00000072364.8	10088.86	19942	26056	21874	6840	7852	11134	12358	21122	7377	21867	18511	14366	14758	18969	16678	9783	15262	7295	11561	15009	14933	11302	11583	24395	8477	14566	10636	14307	10350	25587	5393	11510	19781	15896	12976	8530	10204	14219	20014	8821	13856	20576	17270	18944	8374	16339	9677.2	30529
ENSG00000072401.10	1399	1238	1942	694	640	964	564	1682	1768	891	2032	680	1193	988	1131	1280	1464	798	221	1365	974	1063	1369	869	1963	647	781	1210	878	692	2313	815	1034	1059	1664	573	1250	1013	1178	1129	735	1087	1186	1086	1061	356	1024	1301	2289
ENSG00000072415.4	2846	3040	4852	2047	3823	1347	3096	1298	2991	1778	3104	4134	9859	5860	2002	5077	3902	6777	1312	2320.04	5462	3689	1769	2065	4646	2331	1966	6276	5312	1273	3111	2972	1407	2646	2030	1954	4648	3356	3382	6732	4862	8112	4220	7995	6285	1717	1814	2377	7185
ENSG00000072422.12	3209	5444	3270	3289	6173	923	1234	2110	1359	425	2964	602	7433	9711	4460	4162	3642	2586	2071	5175	6661	2288	1376	3231	2399	665	4605	1584	6745	1094	3658	2397	1023	6444	2567	398	2615	4054	3305	2437	6109	9398	2703	6744	1482	1071	3572	3426	2950
ENSG00000072444.10	0	0	0	0	0	0	0	0	0	0	0	0	0	0	0	0	0	0	0	0	0	1.07	0	0	4.15	0	0	0	0	0	0	0	0	0	0	0	0	0	0	0	0	0	0	0	0	0	0	0	0
ENSG00000072501.13	12005	4484	5108	2965	4131	2334	3617	3317	4954	9370	4914	2623	7790	5889	4900	2623	10122	8362	1865	4689	6273	1906	3528	5847	2974	1848	2916	5945	3072	2554	6258	3163	4086	3307	5497	3571	8930	8912	2547	4258	3639	7314	3872	8717	9626	2485	2201	2926	5165
ENSG00000072506.8	1769	905	1428	1740	2303	1336	2749	1480	2718	2867	1828	1368	3553	1896	2806	1403	2714	3979	453	1106	3281	1001	1410	897	678	1848	815	1718	4849	2235	2547	1600	1224	841	2953	2142	2635	2146	1443	1935	2363	4021	1737	2677	1918	1901	523	2622	824
ENSG00000072518.16	2606	1957	1324	1280	871	1049	607	1395	1768	5470	4255	2144	1664	1351	3381	729	4339	1842	626	2509	1496	1179	1311	2418	851	1003	1541	1607	1032	1210	4803	522	836	1120	2302	1482	3711	2665	714	1072	1475	1834	894	2398	959	1285	1077	1695	1229
ENSG00000072571.15	4985	1453	2177	1736	3266	165	2453	1091	2695	2508	595	43	728	1505	66	868	2012	8840	65	259	4119	175	177	414	853	56	490	3191	735	514	818	2364	2206	330	2816	98	5426	3552	115	6027	345	3550	2108	5751	9074	209	132	159	1873
ENSG00000072609.13	3789	3656	2782	2542	4291	1092	2641	1789	3113	2164	3961	3316.28	4033.49	4131.08	4979	2398	2746	4349	1207	3272	4609.91	2495	1528	3554	1694	3222	2234	2551	5036.03	2754	5339	1699	2237	2628	3525	3703	2981	3167	1912	2793	3211	5317	3127	5171	2928	2541	2492	4254	1646
ENSG00000072657.4	0	4	3805	0	0	0	0	1717	0	110	697	16	0	0	3102	225	5441	141	78	437.25	0	4293	0	437	2	10	1	7047	65	0	1396	67	11	2134	5189	0	5967	96	1816	8958	0	3	19976	14	23089	8	1575	2	0
ENSG00000072682.14	4560	2549	12664	2277	4888	3750	8708	6747	18062	4433	4728	9896	3678	8575	4961	43185	7539	20564	10475	6731	8137	41474	4742	6916	9424	13919	3335	16487	29385	15577	6534	3770	6883	6342	23103	13815	2498	3891	33014	18912	3499	6029	39593	5224	24600	16016	8966	16606	11986
ENSG00000072694.14	0	0	0	249	0	0	1	0	0	0	0	0	0	0	0	0	0	0	0	0	0	0	0	0	1	0	0	0	0	0	2	0	0	0	0	4	0	0	0	4	0	0	0	0	0	0	0	0	0
ENSG00000072736.14	3974.33	4418.84	4711.6	2894.32	1932.97	1931.69	1391.48	2696.37	3199.27	2217	3153.3	2272.87	8018.78	3891.81	3377.65	2039.84	2576.24	2378.69	1536.23	2071.88	2371.72	2121.03	2274.66	2467.72	3938.15	933.09	3531.8	2095	1884.4	2719	3263.94	946.93	2779.33	3957.84	3445.13	961.14	2938.69	4441	2301.56	1565.46	4520.73	5607.19	1569.52	5565.13	1269.2	2870	3116.32	3522	6258.07
ENSG00000072756.12	796	710	1618	653	1119	496	1390	489	1599	626	1063	1075	2281	1751	569	1802	1547	2163	652	553	1887	927	770	605	1163	924	534	831	1833	438	1380	1100	806	1048	1053	791	1158	732	1626	1776	1841	1644	1950	2111	2181	349	724	586	1622
ENSG00000072778.15	9479	6563	6448	4166	8822	10573	14736	5599	9353	9636	8153	6477	12609	10801	12222	18433	18313.87	15082	2235	9963	11184	11183	13237	8042	7563	7543	6063	9618	13531	13947	10151	4004	6343	7704	11484	9849	10297	13487	6586	11216	10496	16237	9904	12368	7992	21222	5951	8717.5	10050
ENSG00000072786.8	9965	5742	4176	4454	11916	2969	1881	997	5263	1919	4220	1881	8009	11111	3762	3414	4755	6900	984	7230	9282	5043	4106	7169	3853	1849	4526	4147	4595	4143	5755	4212	3182	6223	4118	931	5269	5395	1779	4339	5649	9520	3563	12920	3996	9438	10468	8991.08	4033
ENSG00000072803.13	4069	6170	10352	5832	5932	2583	8025	4214	6365	3796	5533	10507	13900	9733	4617	12423	5975	12105	2836	3827	10360	9388	3944	3429.1	6606	8285	4211	5979	13354	4419	8516	4442	4134	7052	6223	7961	5193	4875	11932	8728	8575	13735	10992	10124	10828	4206	6622	6080	9273
ENSG00000072818.7	0	0	138	0	0	0	15	34	17	22	11	5	0	0	11	8	29	8	0	15	3	32	3	0	4	30	1	62	24	0	39	0	35	13	66	54	48	0	116	45	4	3	78	0	118	0	16	2	11
ENSG00000072832.10	5	0	7	11	11	5	9	370	736	7	1390	0	420	248	805	0	192	0	0	1810	4	54	0	178	5	0	0	9	7	3	1663	0	5	0	1977	17	17	11	167	1	14	14	67	46	85	56	6	252	7
ENSG00000072840.8	1879	1669	4911	4320	904	8736	6762	3028	5646	1192	6244	1510	4472	3863	16666	5960	1910	3829	6431	5786	3211	10672	11884	4953	5994	1404	1663	2607	5256	4068	6824	1952	4792	11945	4037	1862	1482	1942	4329	8151	3198	3017	8099	2566	5018	4240	6289	6234	7305
ENSG00000072849.6	2237	1541	3072	1487	1685	1061	2433	1623	3288	775	2892	3102	3421	1540	1949	3106	2334	4344	704	1172	2796	1765	1931	1257	3234	2490	1043	2047	3196	1612	3642	1634	1238	1934	2773	1492	2777	2906	2237	2628	2006	3504	4055	1851	2767	1546	1721	2830	3783
ENSG00000072858.6	3	3	0	18	1	0	0	0	0	262	8	28	5	2	19	27	1	38	0	0	20	0	0	42	1	33	5	14	2	0	3	0	8	0	16	66	25	0	0	0	0	5	0	11	0	0	0	0	0
ENSG00000072864.8	2475	1467	1860	2352	2300	770	1203	1010	1342	3515	863	3526	2252	1584	1769	1134	2165	3091	815	1167	2263	1215	837	1536	1324	3119	1092	2696	1850	867	1404	1234	1110	2118	1995	2844	2748	2287	965	2962	933	2962	1550	3557	2896	1154	1005	890	1906
ENSG00000072952.14	71	84	12060	2	131	162	3681	116	31	19	34	99	256	59	1120	8929	0	2988	2292	51	59	4011	219	137	324	63	58	195	863	443	98	60	46	149	438	110	11	128	3920	1119	234	148	3520	199	823	634	1168	627	772
ENSG00000072954.2	59	65	64	90	68	123	396	349	84	81	167	450	116	77	321	470	314	185	62	12	302	394	98	58	85	407	153	16	304	46	311	69	33	81	78	857	179	0	162	114	131	104	84	104	44	173	37	144	147
ENSG00000072958.4	11200	3825	3683	3491	3470	3633	3737	6629	10193	3036	5222	1382	3684	5519	9484	4109	7270	8188	297	6797	6466	7575	4410	4823	3774	1211	3027	11071	5228	5713	5853	2129	6840	5225	9750	1156	8413	10499	3242	6528	3966	5184	3652	7868	5806	5481	4169	7909.72	4505
ENSG00000073008.10	33943	12060	12253	2333	7181	834	5610	2376	6520	4222	16551	17991	4287	28625	15178	13287	11663	17803	939	22485.01	18145	6100	1099	11927	7439	10302.96	13575	11795	10509	5077	19141	8247	2172	2684	9860	9322	14121	34578	11720	4733	9405	11354	11812.98	11256	9260	8696	2396	4761	8724
ENSG00000073009.8	1490	1291.06	727.63	681.05	1096.42	565.83	910.78	842.63	1483.56	544.54	931.39	559.35	1071.52	1140.39	1293	847.73	1565	1252.13	828.61	717.12	1272.42	1811.89	899.26	900.93	744.84	620.32	1018.55	1506.9	1359.43	771.01	823.95	442.35	1081.99	952.58	1494.15	589.2	1053.67	1845.59	692.43	1898.16	975.25	1737.26	1203.8	1823.47	1454.78	789.1	647.83	1283.95	878.31
ENSG00000073050.7	1425	941	1301	977	1003	739	773	834	1024	1201	1765	663	1304	721	2416	753	1827	1512	428	1221	1792	769	809	1127	645	481	959	2303	1551	629	2114	477	849	877	2330	498	2225	2108	822	1311	735	1596	817	1284	1192	1023	474	1186	1073
ENSG00000073060.11	4462	2803	2436	14361	3464	452	786	1000	2443	5401	2298	1091	1135	2166	6657	1401	1345	1238	242	2451.01	2052	969	484	1914.9	867	772	1624	4764	1605	2420	1914	1153	2006	1548	6333	614	3878	3672	573	1165	1212	2212	2133	4648	1429	1738	865	2764	690
ENSG00000073067.9	0	0	3	0	1	1	0	0	0	603	14	28	1	0	18	0	0	0	0	0	0	0	0	0	3	0	1	0	0	0	0	0	0	0	0	28	0	0	0	0	0	1	2	0	1	0	0	5	0
ENSG00000073111.9	12236	5416	3794	2343	11047	755	6532	2688	8327	6031	4131	1533	2676	11091	3416	2736	9424	17931	438	1402	13059	1636	619	1810	1395	1699	2273	5586	4768	1461	4665	5900	5130	1691	8337	955	16811.75	12386	1526	9299	1470	13824	6979	16433	22400	1184	1361	1204	2279
ENSG00000073146.11	521	1566	602	17	758	40	103	157	88	24	15	4	2924	4832	62	369	16	197	254	96	1707	95	37	386	3	10	2072	86	1763	110	58	452	13	360	55	129	9	186	51	37	3493	2999	375	1758	136	227	96	185	15
ENSG00000073150.9	44	56	49	47	15	169	89	154	43	41	98	76	48	115	21	73	14	25	48	83	170	24	233	108	25	39	108	103	154	50	36	5	18	67	78	81	5	237	5	37	46	42	46	79	80	85	26	37	17
ENSG00000073169.9	1319	822	1198	1216	1897	714	1774	1355	1305	3823	659	1579	1542	1798	1819	1238	2316	1919	450	1369	2831	2329	1086	1079	567	1383	1032	2212	2376	815	755	1041	1059	792	2217	1635	2133	1781	1447	2133	1340	2374	1899	4058	2250	1211	943	1884	653
ENSG00000073282.8	0	0	25	9	5	38	73	17	43	12117	0	29663	2	33	18	58	0	14	0	50	0	6	82	39	215	17563	0	0	0	4	24	0	10	13	186	17784	0	0	5	31	8	14	12	2	3	0	39	0	306
ENSG00000073331.13	671	478	1947	2008	796	752	1977	1686	1346	655	1616	3184	270	491	1315	2493	508	1219	474	425	1602	3744	997	376	2362	1408	494	2346	2260	378	1950	617	1344	2638	1238	6294	464	992	5175	4655	175	325	5913	596	4750	578	1830	950	2948
ENSG00000073350.9	294	205	157	45	568	0	37	49	0	3537	4672	5228	1674	2205	4529	55	5386	54	0	293	429	16	2	144	7	4414	271	76	91	4	5017	87	0	5	66	6290	3503	50	22	12	1949	2459	15	2411	29	20	9	203	18
ENSG00000073417.10	4576	4662	1610	2587	3789	1565	3044	2041	2205	1025	2875	1326	17682	6167	1291	5101	1540	7312	776	2401	3999	2925	2060	2551	2905	929	3448	2042	3339	2354	2912	1081	1497	1877	3693	1664	1977	2248	1954	2713	11697	13113	2273	12068	2438	2091	2652	2616	3594
ENSG00000073464.7	1311	2264	292	65	1006	854	1375	247	770	370	1428	326	1953	1649	1784	1150	270	962	138	523	3493	2009	1457	721	1359	251	1768	115	1723	2381	1832	1714	270	1387	1223	579	797	1347	544	1561	2090	2631	177	2558	208	1798	647	3491.95	1558
ENSG00000073536.13	2147	1431	1045	525	1282	894	944	1260	2585	1898	2193	1694	2117	1509	2043	1744	1554	2491	457	935	2852	2171	1148	761	1049	2529	1298	1155	2245	770	2119	995	1766	1191	2887	856	2885	2318	2192	2158	1084	2492	2108	2443	2617	689	1068	1243	952
ENSG00000073578.12	8036	9118.43	5128.83	6270.96	13673	4063	10249.9	5652	7722	6567	4960	7520.12	13966.89	14850.25	6812	6874.99	6839	13299.06	3657	5938.97	24446.64	10274	4996.1	4969	5874.92	9086.45	6461	6671	13060.5	4073	5872.65	8013.99	6412.79	7028.6	8085	8257.61	6431	9465	8661.91	15685.68	9011.58	21890.12	10249.25	18248.12	14207.52	5012	3943.28	3914.03	6369
ENSG00000073584.14	6502	7254.67	7357.76	4272	5992	3202	7242.91	7683	6431	4859.74	6880	4652	14609.44	6863.03	10853.85	4697	9260	9379.41	3301	5845	11940.21	5898	4749	4729	8616	3292	4390	5240	7567.82	3095	9142	3418	4404	8067.73	5884	5342.4	9240	4976	8214.9	7916	5615.56	11161.32	5916.9	8894	6999	3587	4499	5522	10236
ENSG00000073598.5	0	0	0	0	0	0	0	0	0	0	0	0	0	0	0	0	0	0	0	0	0	0	0	0	1	0	0	0	0	0	0	0	0	5	0	1	0	0	1	0	1	4	0	0	0	0	0	0	0
ENSG00000073605.14	91	205	424	57	161	122	487	202	150	110	163	326	311	727	129	1427	256	372	1222	129	203	646	201	327	377	408	181	85	704	72	246	166	212	649	41	578	174	12	480	573	180	218	888	197	412	79	191	183	474
ENSG00000073614.7	6890	11595	14200	9645	11200	4676	11448	7776	9539	5358	9167	12542	25398	18340	7002	15670	7663	17041	14950	6551	18844	12873	6911	6833	13649	8345	8803	5968	15748	5909	11810	9072	7004	15607	7674	11035	4726	5920	13470	17684	13869	22355	16411	19975	14170	5450	9068	6378	17698
ENSG00000073670.9	10	11	64	126	9	13	8	80	0	34	60	5	9	15	106	29	8	33	22	50	29	119	11	15	11	10	13	80	31	32	36	8	18	96	11	4	52	17	79	71	3	8	86	13	54	43	57	107	7
ENSG00000073711.6	1089	3096	4952	4239	1992	1608	1196	1651	4095	1690	2951	1713	1710	1506	3159	2857	6001	2398	1803	2260	2113	3310	2587	2042	6272	826	1760	2351	2255	2064	3857	1178	2900	6755	2531	1319	3287	2282	2669	5298	795	1956	3633	2687	5504	2317	5117	2382	7640
ENSG00000073712.9	14599	9808	27439	10439	10560	6966	13007	14973	22965	946	8141	3643	14875	13197	10440	19113	7363	20040	5605	7371	16084	9360	8632	7192.89	17834	2599	6333	13001	16678	14280	10542	6079	9244	8951	17348	1425	6631	11879	15543	13077	8160	14321	20181	14369	14137	18859	13339	25384	25716
ENSG00000073734.8	3	42	8	0	11	50	1	0	0	28	0	28	0	4	0	0	0	0	0	0	36	0	37	2	2	35	84	0	0	27	0	116	0	0	0	39	0	1	0	6	0	2	0	22	1	13	0	176	0
ENSG00000073737.12	1	118	6	0	0	24	2	7	0	1739	0	858	0	6	0	6	17	14	0	0	3	1	17	89	0	296	9	0	0	1022	0	95	0	0	21	1054	4	0	0	0	0	0	0	11	1	770	0	2602	0
ENSG00000073754.5	0	0	0	2	0	0	0	0	0	0	0	0	0	3	0	0	0	0	0	0	0	0	0	0	0	0	0	0	0	0	0	0	0	0	0	0	0	0	0	0	0	0	0	0	0	0	0	0	0
ENSG00000073756.7	664	1655	414	1920	234	445	4632	380	1198	5503	415	17080	704	1010	28	8397	386	7904	94	135	681	735	700	581	763	3092	2254	82	4584	12313	489	380	153	1278	2946	2007	1399	389	163	642	3554	680	1588	2346	2124	8708	877	8341	3279
ENSG00000073792.11	3201	6804	5333	1707	2179	2190	144	4958	9079	4725	6637	4044	4568	4695	5408	3157	7450	3450	1303	5164	5534	4881	3148	5275	2682	3429	6465	8633	1857	3442	9524	2523	4211	2669	7090	2981	7470	4048	2899	4126	2335	5478	4634	6248	4736	6327	3642	6839	3761
ENSG00000073803.9	1081	724	1247	1056	688	477	949	886	1605	1272	1752	1409	955	797	864	1524	1366	1846	391	852	937	651	832	835	1305	872	499	874	1450	850	2428	697	690	909	1378	1498	1227	772	885	1338	512	979	1061	900	1130	1199	583	1002	1583
ENSG00000073849.10	3947	6921	55	2147	5797	153	1007	563	76	2122	4999	828	13918	10015	8566	1542	3800	526	429	8717	7332	2	213	6560	465	726	7757	59	2369	528	5249	4027	26	106	1178	754	4245	3451	133	28	8250	7709	68	21534	21	378	317	1409	1007
ENSG00000073861.2	0	0	0	0	4	0	0	0	424	0	0	0	3	0	0	0	0	0	0	0	0	0	0	0	0	0	0	0	0	0	0	0	199	0	39	0	0	0	0	8	0	0	18	0	104	0	0	0	0
ENSG00000073905.8	3	4	8	12	2	1	6.89	2	10	0	0	5	6.99	3	1	8	1	2	1	0	12.01	6	1	0	6	9.01	6	6	10	2	0	7	9.98	8	5	1	0	1	10	5	3.5	19.23	8	6	9	0	4	9	8
ENSG00000073910.15	1658	3192	9303	1470	5242	87	1665	239	1433	241	1422	235	10812	2580	3540	4518	192	1332	1121	937	2226	4726	81	779	4019	85	2022	3748	2937	349	1483	2086	987	3410	2229	532	57	3064	1355	6699	9959	11155	13526	7133	4755	306	3260	1875	5177
ENSG00000073921.13	14522.89	12129	17978	9386	13873	8797	23766	5874	17181	4526	17204	19165	15128	20581	13814	29101	15588	39627	3896	10061	18629	15577	11245	11177	17912	11525	8552	9731	26560	12062	23823	8301	6843	11618	10580	11930	11815	15634	17021	18507	12556	16231	18803	17920	18643	12551	14369	11970	23553
ENSG00000073969.14	4833.88	4630	9420	4273.09	5101.84	2129	6163.31	2049	9391.82	1526.28	1756	4669	9147	7098.93	2743	10554	1969.14	12526.52	1827.06	2573.72	8848	8208.77	2867.2	1887	11292.37	2681.88	2682	5277.98	7810	3456	2720	3508	3997.44	6750	3541.05	4004	3229.47	5323.98	5626	8655	5055	10699	9514.86	9104.31	10087.67	3378	6575.97	3945.64	9524
ENSG00000074047.16	84	13	1398	0	7	824	226	2814	928	127	855	0	11	2	3744	460	743	1105	234	330	14	1277	882	501	658	13	5	952	1108	860	1286	11	479	807	4361	3	403	93	501	848	1	5	643	1	591	928	594	3391	666
ENSG00000074054.13	5923.97	7602	7648	8607	6337	4087	3730	5158	6094	5049	10249	7461	8561	10225	8357	5695	7983	6779	1842	6270	7553	6152	5100	6019	6183	4187	4909	4854	5531	4008	12204	2611	4172	6515	6798	4878	5445	6171	5482	7783	6286	9021	6202	10472	6015	3660	5577	4005.15	7762
ENSG00000074071.9	4534	1466	1324	2054	2675	1483	2161	2082	3058	5365	2190	2339	2575	2310	3753	1482	4993	3475	812	2550	5416	2040	2150	1792	974	1919	1351	3532	3772	1742	3085	1302	2171	1565	3979	2079	6418	4023	1946	2749	1913	2938	2914	2986	3319	1508	644	2653	1003
ENSG00000074181.4	74	268	5230	286	1298	12993	56267	10883	20595	29809	7356	19357	205	406	5530	48771	6151	61156	6309	1437	292	13280	17195	6838	4172	13538	284	3148	14804	39460	9155	74	4817	2840	11386	37073	1207	504	5654	4144	103	94	5890	210	2992	30029	1171	15609	12880
ENSG00000074201.4	3860	2538	3454	2658	6090	2011	4809	3386	5535	5040	2623	7883	11026	6564	3852	6284	4722	6631	6726	2502	9245	6116	2727	1487.56	3608	9788	2260	4435	8236	2567	4417	4064	4613	4226	4264	7665	5294	4310	9811	7753	4645	10732	7734	7218	7146	2561	1909	3771	4070
ENSG00000074211.9	2	15	0	0	21	0	3	0	127	91	0	2123	203	55	0	1	0	0	3	13	15	28	0	37	10	109	19	0	5	19	0	0	9	7	18	396	0	0	5	13	126	114	144	121	124	0	11	0	3
ENSG00000074219.9	4292	3626	2200	1745	3400	733	941	3904	974	2100	2906	525	8592	3908	5073	1214	6686	2474	793	3107	5906	1677	1153	2346	1357	604	3873	2209	3284	1699	3770	1681	355	1743	4569	480	5035	4808	1833	1346	5101	8121	1225	8504	1105	1695	1587	2426	1374
ENSG00000074266.13	807	715	1282	661	1271	460	874	447	1063	702	618	835	1266	2090	352	1181	824	2168	498	492	1969	825	376	508	869	745	365	554	1131	373	573	837	855	952	847	818	1276	607	1322	1614	995	1588	1262	1195	1677	504	454	641	1374
ENSG00000074276.6	0	0	0	0	0	0	0	0	0	0	21	5	5	3	2	0	2	0	0	0	1	10	0	0	2	9	0	0	1	0	11	0	0	0	0	8	0	0	0	10	1	9	1	0	0	0	0	0	0
ENSG00000074317.6	17	16	0	14	5	13	5	0	101	17	0	19	25	39	0	25	0	55	0	50	5	12	3	15	0	0	0	0	0	0	0	0	0	0	0	0	0	0	2	56	47	85	18	34	99	0	0	0	0
ENSG00000074319.8	1753	1398	1876	1567	1408	1143	1760	2174	2858	2150	3908	2668	3271	1741	2635	2176	3768	3743	541	1912	1859	1772	1503	1427	1846	1964	1200	2840	2365	2041	5682	920	1269	1603	3586	2218	3204	1994	2046	2110	2338	2713	2000	1815	2136	2361	1513	2918	2272
ENSG00000074356.12	2227	3432	3042	1701	3386	1175	2337	1159	2374	1546	3082	2115	5652	4565	1795	3383	2646	4377	2236	2441	4952	2696	1765	2379	3195	1541	2456	2338	3380	1134	4118	2201	1762	2393	2000	2284	2506	2829	3992	3524	3297	4781	4655	5268	4098	1650	2051	2182	3528
ENSG00000074370.13	89	0	56	6	41	7	106	643	239	2	1576	8	9	11	454	290	77	151	33	46	125	861	2	48	407	3	4	153	473	18	1992	77	66	533	4718	6	56	132	881	288	4	1	621	27	71	2	24	145	490
ENSG00000074410.9	7	111	1456	211	56	9749	8450	1453	16693	16340	526	5518	69	26	1157	27148	2900	9920	1235	591	122	25350	13086	556	13164	7017	67	5442	4380	17146	538	219	12588	4751	1773	6422	954	139	5377	14024	24	29	29830	111	17301	7361	3600	917	16749
ENSG00000074416.9	22561	8421	15803	386	7899	884	933	798	12887	4431	9911	4940	4633	7874	18252	9207	13007	8211	425	9340	9388	10249	1194	5359	2501	3345	6146	10138	1432	2592	12065	2643	3649	7639	9886	6557	12866	18609	2094	6329	6722	9759	3672	11459	5649	4136	7113	4367	3265
ENSG00000074527.7	31189	23260	12589	27	50942	161	36463	170	1391	1612	7890	8513	16329	103013	10422	47218	15743	23124	545	9533	16071	5716	323	16241	10228	5383	25334	79	37090	6649	10199	12791	2440	1051	2365	6229	13393	14068	1050	1321	95521	44523	1036	69220	382	6389	3209	1773	18097
ENSG00000074582.8	1468	796	866	791	1370	387	1134	918	2544	1419	896	2223	1067	1387	959	866	1599	2870	377	812	2370	1085	579	555	659	2234	537	1692	1755	447	1137	1235	1379	510	1326	1600	1716	1965	1032	1615	1019	1641	1445	1632	1883	836	480	576	614
ENSG00000074590.9	16327	19778	13096	112	39059	210	674	965	1992	1862	8339	1306	9907	19738	6240	8052	3123	4089	1030	10508	9913	1084	329	10456	993	1566	10754	2018	26446	1471	9972	6593	185	4862	7073	779	3669	5922	1364	932	10262	11083	9479	21324	2684	2069	5557	2394	1429
ENSG00000074603.14	3653	5449	5323	5062	5760	1879	6133	3471	4558	2300	3747	4972	12635	7520	2935	6140	4026	6386	2846	2856	7836	4519	2750	3189.69	6946	3400	3797	3136	6364	3586	5042	3358	2725	6290	3904	4881	3330	4240	5111	6825	7128	10098	5597	9217	6004	2454	3746	3221	7193
ENSG00000074621.9	773	1134	815	1068	412	491	585	1212	922	499	1727	501	3559	1492	1603	388	797	602	732	658	676	827	607	695	1243	227	1037	987	483	531	2263	135	977	1979	924	270	539	656	599	1069	1368	3367	574	2083	631	679	1107	824	1463
ENSG00000074657.9	4547	6013	4414	1304	5573	2582	3634	3821	2348	2460	8301	5097	8256	8326	6372	5139	5172	3720	1552	5474	4862	4470	3356	5434.11	6842	3873	3557	2972	6260	3669	9064	1536	1688	7257	4984	3979	4177	3769	4915	5884.99	4494	6793	3469	7433.99	3531	2921	3646	4140	7941.99
ENSG00000074660.11	12112	12601	87	12	13135	361	461	192	7	0	3365	25	20675	11944	387	419	1567	151	49	9436	17786	90	197	9854.73	66	56	9827	75	33	271	3729	7370	2	75	415	36	2358	13436	91	87	13875	19654	38	23663	43	57	45	5	97
ENSG00000074695.5	17591	16011	32472	5451	11428	12792	23588	24415	38483	10783	14767	45265	23208	14800	11440	57373	12949	48419	10422	11402	21591	23321	18836	10184	45775	18510	13455	30601	31272	28125	20264	12439	17840	17594	38734	18396	12380	19039	19731	36761	12608	21885	46551	26635	36723	27322	15301	20706	52612
ENSG00000074696.8	7071	7238	8310	10843	6508	3487	9827	5654	9406	6604	8727	8419	20678	12788	9361	13228	14943	13540	1661	6016	16267	10158	4439	5026	7313	6689	6015	8126	13554	5916	11997	8513	4481	6444	9870	3286	17090	9956	9194	13198	12505	19307	9671	14049	13149	5394	5541	7854	9813
ENSG00000074706.9	92	51	159	8	25	0	24	3	0	19	54	76	814	120	113	5	142	0	48	6	4	9	0	39	20	24	75	0	2	0	83	0	9	28	0	20	89	1	20	71	314	711	13	243	24	0	19	47	29
ENSG00000074755.10	11334	10410	8501	10231	7596	4822	5850	4104	11052	3520	9445	6788	13400	14191	9184	7461	5026	11261	4783	7829	11800	10469	5711	8446	8364	3529	8386	7057	6491	5084	9754	3409	6995	10193	6198	4113	4674	9037	6044	11581	9386	12647	8107	21767	9752	5094	7799	4745	9845
ENSG00000074771.3	0	0	0	0	0	0	0	0	0	0	0	0	0	0	0	0	0	0	0	1	0	0	0	2	0	0	0	0	0	0	11	0	0	0	0	0	3	0	0	0	0	0	0	0	0	0	0	0	0
ENSG00000074800.9	138690.95	83879	56401	31357	98816	45264	61218	63111	211168	126959	59986	36267	75477	83837	69696	81200	149082	194575	16606	60382	184675	63756	56961	37438	143247	79947	58509	115046	142929	125981	74900	58102	103996	48549	163130	54207.64	161083.64	156589.68	56557	142560	67036	159923.03	86450	135864	168137	159506	57511	121975.98	145580
ENSG00000074803.13	0	0	0	2	0	0	0	0	0	0	0	0	0	1	23	6	3	1	0	0	0	0	0	0	1	0	0	0	0	0	2	0	0	0	0	0	0	0	0	0	0	0	1	3	0	0	0	0	0
ENSG00000074842.3	6250	3457	4426	2361	7840	1665	7780	2009	5779	3224	3454	12324	7154	6859	4486	6968	2464	9181	874	2571	9758	4849	2117	2155	4027	9011	3328	6568	13121	3319	5070	2901	4654	3174	8029	10847	3571	3509	4780	7081	5755	9195	10370	6354	7541	3002	2018	3613	3677
ENSG00000074855.6	356	338	420	391	500	391	916	629	1097	945	1000	509	519	823	2865	545	962	593	221	708	552	487	394	866	316	287	397	532	700	84	1004	208	484	1238	619	500	436	132	839	1123	543	465	790	696	742	340	704	606	365
ENSG00000074935.9	1137	745	1465	519	783	389	839	558	1269	573	1799	3453	1123	1074	620	1928	315	1301	394	389	922	843	722	485	1651	1886	508	1549	1585	870	1421	1103	690	1157	1207	1951	859	983	2288	1192	834	953	3614	1032	2502	932	597	1224	2072
ENSG00000074964.12	243	73	1712	2968	49	1233	4603	284	2430	2449	3194	665	148	145	4713	2721	3501	3592	915	1746	732	4098	1516	1602	2298	828	93	2092	3283	934	3260	441	1814	4131	1504	1858	2427	695	1905	2646	27	252	3226	122	3017	987	2511	1512	2533
ENSG00000074966.6	71	10	34	12	6	0	6	0	14	0	22	10	9	6	12	1	158	12	13	22	16	14	0	7	8	6	2	100	10	0	31	38	4	4	74	9	62	64	17	8	12	4	1	12	1	0	20	0	22
ENSG00000075035.5	0	0	0	0	0	0	5	0	0	0	1	0	0	1	3	0	0	0	0	0	1	0	0	0	136	0	0	0	0	0	7	0	0	0	0	0	0	0	3	0	0	0	0	2	0	0	0	0	61
ENSG00000075043.13	0	0	0	0	0	0	0	0	0	0	7	0	0	0	0	0	0	5	0	0	0	0	0	0	4	0	0	0	0	0	0	0	0	0	0	0	3	0	1	0	0	0	0	0	0	0	0	0	0
ENSG00000075073.10	29	3	0	43	2	3	20	0	35	0	12	0	0	3	0	52	15	15	0	0	6	1	5	20	12	5	18	0	10	0	0	1	2	17	14	1	0	0	11	0	47	3	4	6	0	5	4	0	14
ENSG00000075089.5	616	352	837	687	573	299	640	703	788	869	661	1117	1283	734	337	1041	1020	1052	239	371	880	554	451	250	649	632	317	888	705	473	1034	454	500	525	1171	780	1027	963	776	1138	554	955	1088	860	1031	342	399	406	1017
ENSG00000075131.5	731.56	506	645	465	615	101	807.86	111	912	598	293	737.89	582.57	630.92	193	530.44	385	1526	73	96	1287.54	393.29	100	121	319	490.99	282	278	617.52	119	314	667	540.6	467.43	530	751.57	914.81	575	778.03	747.36	349	842	806	756	1494.09	257	273	254	639.92
ENSG00000075142.9	5332	3732	3449	1773	6836	1917	5288	2601	7055	3346	3015	2885	10345	4745	3799	3718	5054	7834	627	3336	9848	4112	2807	2313	5448	3357	2475	3856	6201	2290	4153	3942	5294	3335	4446	4671	6187	5893	5151	7050	5411	13431	5639	5298	6394	2764	2119	3639	4687
ENSG00000075151.15	6335	7483	9917	4895	4322	4560	5813	7537	8803	4607	5565	6221	9851	9074	6625	8191	5498	5987	6386	6507	6525	6978	6949	6804	8769	2926	5412	6585	6328	4583	7940	2312	5730	7300	6376	4446	3894	4882	6128	8450	5324	7252	10481	12453	8122	4719	5153	6949	11068
ENSG00000075188.4	2546	1062	1502	749	1527	692	998	1175	2208	1880	790	957	1540	1353	824	1788	2268	3037	655	776	2299	1563	642	515	1198	1074	659	2523	1305	961	1074	2158	1289	1093	1540	727	1949	2618	1438	3702	782	2319	2209	2796	4201	645	732	768	1578
ENSG00000075213.6	1198	1632	7098	376	727	30	7697	8860	205	3650	1058	7442	21607	6633	3431	3777	2912	13330	250	1002	683	10580	51	979	15051	7626	2431	2723	1373	358	1485	7581	936	18449	10679	7155	3471	544	3326	19672	21875	17271	3106	19432	16688	102	11930	139	19207
ENSG00000075218.14	2536.48	1101	829	1000	999	20	396	466	1078	412	279	9	230	541	170	63	1983	1420	39	120	1113	32	152	426	552	5	493	1420	226	260	442	560	741	414	1488	6	3476	2420	33	925	127	1087	431	1986	1576	350	129	83	774
ENSG00000075223.9	1	29	14671	24065	32	3917	4514	3771	32499	13545	10946	29498	21	50	22324	48709	6196	32919	17622	1553	893	19244	5719	674	76719	22312	25	70624	46287	5255	15492	419	12757	36850	21143	18004	12998	437	29174	21514	7	8	49811	580	31897	2770	19649	9430.03	121299
ENSG00000075234.12	2786	2305	1516	1229	1779	1482	1449	2195	1658	578	1894	409	3405	2283	5217	1116	2692	2353	330	1607	2488	1884	2222	1619	1494	479	1093	2339	2306	1238	2209	1295	2164	2000	1831	312	2499	2176	1840	2398	2019	2738	1966	3016	1958	1341	1426	2218.01	1789
ENSG00000075239.9	7560	3006	2986	3030	5305	1812	5162	2789	3019	3168	1534	1103	11297	7153	2033	4061	4537	5645	2020	3869	5699	4532	2001	1501	4536	2105	1472	3626	5357	2572	2442	3030	3628	5187	3587	1285	3845	4954	5391	8133	7436	12022	6555	9965	6323	2204	3110	3566	5105
ENSG00000075240.12	1393	1168	1238	4999	1488	1030	2199	12787	1080	1903	2826	2809	6852	2657	3670	2565	1548	1567	1562	1866	1656	3935	1047	1640	1850	2221	1190	1156	1863	760	3893	857	727	2008	1065	2793	1409	1153	3826	1686	3982	4943	2681	3906	1409	1104	959	811	2206
ENSG00000075275.12	1193	2353	221	3130	908	254	441	457	33	26760	58666	15691	11896	25385	30623	838	23379	316	407	4111	77	444	214	1903	1988	10266	4062	1	136	228	65110	27	44	252	1228	16472	11048	59	688	207	16938	11816	2289	21808	844	253	263	248	3440
ENSG00000075290.7	0	0	0	0	0	0	0	0	0	11	4	2	0	0	0	0	0	0	0	0	0	0	0	0	0	0	0	0	0	0	0	0	0	0	0	0	0	0	0	0	0	0	0	0	0	0	0	0	0
ENSG00000075292.14	6830.57	10742	12758	8319	10116	3490	13911	6269	11178	3521	7789	10945	24844	19364	4058	17510	6540	14658	6806	5398	18585	10142	4951	5931	14915	7599	7124	5652	12396	3812	10730	7984	8442	13360	5094	9842	5355	6570.99	15374	17275	12072	18596	16592	20548	15560	4064	7904	5297.02	21855
ENSG00000075303.8	1029	715	853	830	608	406	399	899	695	690	627	241	973	701	762	424	1158	641	174	261	477	349	595	549	871	174	336	770	339	238	984	366	565	1041	915	165	1238	875	488	932	601	1059	578	945	799	270	551	525	1082
ENSG00000075336.7	1614	630	677	411	964	646	1120	748	2060	878	735	1267	1404	990	403	990	1291	2695	168	771	2105	581	827	562	529	824	414	795	1387	713	1221	506	642	363	919	922	1821	1071	831	1105	1031	1504	891	1199	1671	1030	302	994	818
ENSG00000075340.18	2032	134	0	63	469	1	5	94	7	2	1273	7	4716	781	241	14	2306	2	2222	98	910	0	4	38	5	0	53	0	5	0	1615	153	20	33	55	0	1388	171	318	10	271	5238	44	1966	103	0	0	13	4
ENSG00000075388.2	0	0	0	0	0	0	0	0	0	0	0	0	0	0	0	0	0	0	0	0	0	0	0	0	0	0	0	0	0	0	0	0	0	0	0	0	0	0	0	0	0	0	0	0	0	0	0	0	0
ENSG00000075391.12	4507	9696	9523	6118	7981	3232	4523	1011	12080	4655	4622	3301	6551	10178	5982	9343	2602	7026	6280	6869	6206	4923	4708	6158	9019	3997	6643	3026	8289	3478	5998	1890	6742	7015	3190	3021	2728	3006	2389	8145	5144	8178	6829	12499	8504	3081	7959	6362	11552
ENSG00000075399.8	606	494	636	490	302	447	569	839	530	360	407	211	393	507	2106	524	1112	404	271	666	615	1298	726	872	780	177	760	578	850	686	938	126	481	1262	953	347	319	316	616	1077	379	518	788	658	651	857	945	1082	813
ENSG00000075407.13	1523	1774	2595	1496	1851	2078	2495	3070	2798	1191	1846	4848	3547	2809	920	3743	1183	3970	802	1223	3138	3233	2811	1193	2977	2695	1144	779	2682	1512	2151	1452	1441	2429	1598	3603	985	1430	5262	3010	2117	2945	3161	3478	2714	1438	1814	1630	3459
ENSG00000075413.13	5139	6078	7462	4906	4813	2948	5570	4030	8102	6036	4729	9072	7687	7133	4355	6956	4888	8134	2478	4863	8753	7013	4024	4096	5232	6657	3785	5771	8799	4016	6364	3667	4635	6484	5491	8585	5460	5548	8399	10078	4885	7204	9413	7523	9028	3926	4233	5738	6298
ENSG00000075415.8	32910	26455	24143	15200	26784	12588	21255	21616	44286	28415	24857	26868	43987	23661	30106	24750	30126	33745	14729	17298	44160	26091	17789	10865	31683	31360	20706	42484	46951	23111	32038	15620	23533	32007	40016	22182	38388	41669	28959	45068	20790	49689	36748	42949	35590	27529	21187	36237.5	35927
ENSG00000075420.8	15063	38342	36603	7547	17433	14830	25975	12679	22853	3882	14676	10321	29134	46188	18408	40503	9388	32603	4349	22298.69	38106	16863	21476	31624.9	31550	7877	32706	11253	31170	24439	18507	15626	11845	19421	22485	6186	7371	20426	12202	18053	19456	31590	22037	37922	15707	19285	27680	18395	39329
ENSG00000075426.7	15328.45	9256	16490	3593	10216	5974	5441	12170	13256	18105	18847	15271	5961	20945	56092	19033	23540	13027	3103	10880.48	7291	20593	8094	15148	49372	17515	10504	11098	9005	13510	22525	5890	7426	24109	12377	25307	25235	16949	17769	11964	16017	8370	13991	17010	9167	16422	56485	14521.02	62363
ENSG00000075429.4	0	0	0	0	0	0	0	0	0	0	0	0	0	0	0	0	0	0	0	0	0	0	0	0	0	0	0	0	0	0	0	0	0	0	0	0	0	0	0	0	0	0	0	0	0	0	0	0	0
ENSG00000075461.5	0	0	0	0	0	0	0	0	0	76	92	4	0	0	39	0	35	0	0	3	0	0	0	0	0	0	0	0	2	0	95.51	0	0	0	44	1	18	1	0	0	0	0	0	0	0	0	0	43.75	0
ENSG00000075539.9	10486	18751	8041	6332	20609	2480	11696	3427	11254	7708	7249	14703	32794	29863	6062	10685	8036	17850	3683	8737	24030	8817	3606	8471	8833	7543	12666	6652	12576	4784	8304	10946	5737	9183	5089	8778	6530	11288	8272	14673	18300	24309	13752	36932	18975	5158	5684	4211	12529
ENSG00000075568.12	3799	3724	4835	3267	2662	3194	5030	3702	5750	2630	3361	4607	5156	5675	3678	5591	2082	5727	1158	4405	3203	6906	4127	3913	4981	1781	2367	3005	3528	3433	4323	1489	3700	6433	4191	2211	1854	4036	4403	8283	3000	4051	7206	8094	5411	2771	4662	2958	6175
ENSG00000075618.13	45742.17	40870	21018	433	45354	13447	17304	25851	38705	61735	25355	22361	63809	46202	48493	7897	32507	22221	4938	68791.74	57282	27997	17248	93695.71	18510	24070	34820	25560	44183	19553	26065	16614	18332	33264	49250	18032	36689.84	24300	11371	34326	27279	78199	16404	84443	33531	22302	26415	41751	21823
ENSG00000075624.9	283442.72	270751	495811	170834	180557	67962	150569.18	133994	491062	233598	217967	177744	184450	313325	280287	134668	267191.07	360805.85	87559	204473.33	290983.23	246234.96	86694	267557.76	213018	100793	226606	229218	431774.68	106981	234127	109105	176830	331503	365564	111516.01	299306.96	282737.9	118272	265340.79	119778	272441	250674.16	363119.99	287137.02	160680	296482	215436.5	228778
ENSG00000075643.5	1320	83	556	12238	118	186	629	242	3549	274	3924	9173.03	57	47	3532	1209	1338	876	391	222	216	2765	420	250	2213	5465	71	259	219	393	3717	1349	1614	532	344	8344	3330	1156	2294	1418	19	78	1404	216	582	217	2108	758	2194
ENSG00000075651.11	6760	6356	2469	4772	6699	1100	4590	1781	622	1804	1031	1696	16565	15184	2644	5674	1106	3514	675	6249	9983	2516	1339	4950	4158	952	3820	1277	2514	2209	1162	3851	676	3668	2265	2126	940	5891	950	2464	8251	22493	2424	18362	1851	1948	2889	2302	5100
ENSG00000075673.7	0	0	0	11	2	0	0	0	0	4097	5	357	3	0	0	0	0	0	0	0	0	0	0	0	0	1133	0	0	0	0	7	0	0	28	0	5638	18	0	0	0	0	0	0	0	0	0	8	0	4
ENSG00000075702.12	1718	753	985	754	814	51	865	155	799	697	343	93	182	678	346	170	2279	1672	27	302	924	98	31	429	425	58	439	1232	234	149	333	598	536	354	1027	58	3261	1910	76	1236	203	900	831	1521	2749	186	206	193	710
ENSG00000075711.16	4080	4865	7828	3618	3527	1458	4126	2143	3719	4245	8581	11112	22611	9989	7692	8720	7550	12962	2924	5180	8285	4322	1941	5639	5898	7341	3066	2811	9175	2575	10987	2708	2265	6143	6022	10492	4606	3021	6212	5958	11931	13528	9394	11499	5907	2588	6926	3347	8800
ENSG00000075785.8	8193	4937	4278	9358	2276	4719	2948	5461	8127	4788	6826	3343	3331	3899	6536	2330	4282	4002	3589	6679.98	2963	3375	7193	7253	6510	2827	3588	4565	3375	3954	8961	971	4394	5791	5478	3608	5011	5509	2281	5078	2413	3946	3286	3303	4260	3644	2962	5501	7235
ENSG00000075790.6	9018.46	5548	3021.09	2313	4104.51	1898	4227.66	1962	4743	2009	1913	1841.86	5740.33	4746.29	1353	4102.41	3275	4311.47	1538	4343.58	8043.52	1624.8	2404	3685.18	4433	1285	3919.56	4340.03	4002.44	2400	2458	3072	2093	2999	3333	1736.29	3077.09	8566	2431.71	3981.37	4341.61	6001.64	3864	4941.82	4904	2141	2739	2697	6078
ENSG00000075826.12	140.9	383.25	485.21	550.08	248.33	59.69	292	535.85	273.24	51.32	216.62	85.44	604.8	517.37	603.05	487.73	434.68	162.85	538.64	385.13	372.05	472.64	215.09	577.91	364.05	180.89	458.94	125.14	265.61	123.61	316.51	172.29	207.37	468.39	58.02	201.56	126.45	140.28	403.87	422.45	372.83	238.42	475.68	242.03	209.16	567.85	383.58	361.08	496.99
ENSG00000075856.7	4101	3021	3712	2186	4649	1839	4758	2378	3822	3810	4141	5813	7620	7770	2876	4501	5113	7677	2963	2133	8881	4356	2257	2257	2664	3777	2000	3834	6658	2248	5159	2928	2465	3463	4969	6149	4958	2984	5965	5999	5080	6834	6945	7983	8237	2392	2615	2939	3502
ENSG00000075884.8	0	0	6	108	0	0	0	20	0	0	0	2	0	4	0	0	0	0	0	0	1	0	0	0	0	0	0	0	2	0	0	0	0	13	17	3	0	0	3	1	0	3	4	0	1	0	3	0	0
ENSG00000075886.10	0	0	0	0	0	0	0	0	0	0	0	0	0	0	0	0	0	0	0	0	0	0	0	0	0	0	0	23	0	0	0	0	0	0	0	0	0	0	0	0	1	0	0	0	0	0	0	0	0
ENSG00000075891.17	0	0	0	0	0	0	0	0	0	0	296	0	0	0	1777	1	363	6	0	54	0	0	0	47	0	0	0	0	0	0	339	0	0	0	0	1	299	0	4	0	0	0	3	4	0	0	0	0	0
ENSG00000075914.8	1845	792	900	469	1216	896	1743	727	2293.19	2985	1088	2100	2809	2215	1096	1863	2705	2441	1328	1123	3206	1035	1007	800	1181	2294	655	2350	3207	1322	2062	1610	1221	1305	1329	2015	2089	2491	1490	2164	1135	2987	2287	1582	2687	1352	955	1642	1570.31
ENSG00000075945.8	1638	1339	2911	1598	1620	850	3574	1001	2824	1338	2014	1710	3739	2845	1434	5594	1560	5721	2195	1154	2373	3217	1609	1282	3407	1031	1103	2318	3081	1377	2897	916	2288	3675	1845	1621	1480	1708	3177	7069	2495	2540	2983	2439	3255	1537	3942	1692.01	6064
ENSG00000075975.11	3157	2901	3625	1940	3021	1913	2786	3255	4778	2622	3714	2773	5156	2302	3897	4960	2713	5603	1121	2641	5073	5557	2450	2233	3418	2075	2412	3880	4656	2911	5310	1822	2675	3534	4790	2142	3669	3190.12	3287	5039	2745	5049	4729	5013	5274	3181	3346	4470	3729
ENSG00000076003.4	5038	1735	1483	739	3415	858	2624	1711	2860	2949	1047	774	3199	4308	2650	1238	5246	7018	765	836	4349	1434	1120	1797	2590	493	942	5070	1975	1491	1573	1940	1890	1183	5051	329	9400	5827.94	1292	4548	1248	4913	3261	7333	7479	1119	710	1849	2859
ENSG00000076043.5	5194	2149.98	3588	1904	3352	2427	5016.99	1663	2984	3946	2724	2901	5390.91	4255	3128	7715.97	5342	8872.96	6006	3546.64	7540	4613.98	3558	2244	3750	3632	1275	8232	10506.96	5158	4222	4051	1964	2406	6372	3312	4904	4410	6579.97	5157.98	4304.98	5637.98	9835.92	5062.4	5670.98	5770	2165	5907.99	4917
ENSG00000076053.6	1621.35	2586.68	4370.37	1351.31	2332	855.53	1381.12	1371	2181.5	582	2457.87	2954.06	5952.11	3395.24	2787.62	3687.71	1562	4329.38	386.95	807.51	3381.21	2006.42	1438	1307.38	4240.06	2000	1730.48	2610	5271.79	1399.6	2708.99	2112	1395.5	2402.13	2753.64	2144.42	2015.56	1523.62	4129.52	2935.92	3515.01	5780.85	3872.48	4058.25	3297.02	2055	2672	1468.49	5965.46
ENSG00000076067.7	5207.15	4992.45	3539.14	1009.92	3907.57	1251.99	1452.59	2541	1377.72	1750	4357.98	2206.9	7371.37	5870.6	5343.84	1787.96	3122.94	2095.68	444.36	4584.98	2603.98	2134.96	1790.11	5194.51	4491.66	1062.76	4966.73	1434.43	2500.26	1080.99	4598.94	1308.38	988.56	2289.28	3313.85	1227.75	4154.59	5396.99	1664.72	1887.83	4807.14	7706.43	1240.54	9045.46	917.81	1789	2273.28	1851.78	6436.53
ENSG00000076108.7	6387	5625	5108	4235	3323	2808	1391	5631	3554	5721	7928	3613	5080	6445	10307	1652	5352	2672	1509	7089	3013	2935	3776	8139	3264	1569	4304	4374	1898	2877	9100	1182	2337	4681	5635	2834	5398	6094	1971	3789	3354	4443	2574	9521	2920	2937	3602	3511	4541
ENSG00000076201.10	4567	1901	2196	1936	2662	2422	1802	2543	2493	2825	4508	2397	3091	5933	6967	1902	2848	2809	775	4073	2860	3877	3114	5352	1369	1840	1843	3026	2432	1600	4160	1037	1764	2565	3398	1948	2597	3997	1862	4713	2239	2967	4096	8178	4523	1973	1749	3006	1423
ENSG00000076242.10	3029	2197	3219	2220	3080	970	3479	1430	3580	2478	2111	2462	3587	2787	1815	2802	3312	5853	1566	1457	3311	2615	1313	1148	2752	1840	1161	4185	3725	1597	3006	1421	2215	2511	3441	1849	4384	2567	3422	5021	2102	4577	3993	3963	5889	1713	1874	2236	3669
ENSG00000076248.6	3393	1692	1851	991	2171	792	1156	1065	1568	2291	1455	1143	2562	1086	2456	1866	3406	2299	883	947	2781	2044	1016	951	971	1713	1243	1346	1288	437	1894	1346	1107	1249	1843	1087	4242	3368	1971	1214	2004	3207	2296	2456	2033	468	1097	1720	1710
ENSG00000076258.5	9	34	62	202	11	190	219	52	97	54	57	34	129	19	89	130	43	52	193	72	34	81	146	25	451	39	43	89	154	156	34	9	77	247	70	56	28	12	208	262	32	39	147	33	66	138	1049	404	639
ENSG00000076321.6	1950	1957	2215	1139	2966	823	3525	1484	1937	1349	1041	3346	5877	4119	1251	3574	722	3890	978	1441	4230	2969	1416	1218	2153	2322	1734	1638	3627	1204	1705	1597	1293	2068	1623	2270	736	1728	3311	3639	4202	4765	3162	4300	3354	1408	1627	1753	2979
ENSG00000076344.11	39	145	33	179	96	102	409	97	101	32	7	1	8	92	97	280	136	26	83	132	195	787	227	194	220	1	165	41	173	187	2	61	188	535	24	14	1	106	379	235	16	43	138	20	25	319	132	372	317
ENSG00000076351.8	522	297	1465	835	522	461	1404	441	846	472	848	1171	138	718	760	2158	577	1540	137	328	598	1471	664	336.38	891	924	196	697	1626	977	1232	377	496	762	486	349	665	815	818	742	123	260	1174	500	688	475	783	575	1019
ENSG00000076356.6	55863	47833	215	19	21157	1430	4440	542	8114	7140	3246	3883	20812	68021	1444	1194	2195	4081	917	40892	41260	628	2082	41722	2750	3011	38188	2952	6205	11025	3074	8222	230	915	3248	2668	3407	34259.86	961	771	21405	32780	118	47038	57	8271	1709	6023	5180
ENSG00000076382.12	5570	2703	2999	2751	3866.96	189	3377	1077	4304	2813	664	133	952	2488	456	852	7502	8188	79	586	4901	424	180	865	1082	67.28	1169	4476	1502	963	845	1993	2363	855	3646	161	8090	5323	215.85	5104	584	4592.79	2692	6506	10980	652	359	159	1927
ENSG00000076513.12	5662	4442	16162	2697	5423	2657	4974	2527	7525	2284	4606	5219	9933	5634	6101	15932	5288	12038	3438	2415	4704	16825	3684	3274	18112	3620	3697	8506	7584	5040	5443	2595	2478	14138	8019	3011	8598	4505	9151	16155	5684	9814	12216	9666	22560	4782	16715	6370	20092
ENSG00000076554.11	934	697	177	314	1031	14	5	3	72	3745	3414	4456.03	2700	2141	867	319	3800	128	0	416	27	0	0	321	153	4433	549	70	28	44	4727.05	776	9	61	301	5389	2791	522	5	38	2480	2411.2	584	5621.03	461	19	52	2	257
ENSG00000076555.11	399	240	429	1529	613	1600	624	463	341	190	320	167	590	244	912	429	275	346	739	140	184	1207	2098	267	953	70	88	240	240	168	310	57	634	2707	395	130	157	139	776	1193	579	483	796	1425	516	192	873	528	1404
ENSG00000076604.10	2053	2048	3107	1803	2041	541	1153	1515	1908	4979	9642	3414	2210	1598	6429	1539	6468	3491	403	1941	3841	1658	677	1791	687	3033	2064	1938	2987	1778	11349	1175	860	901	3043	1716	7052	1247	1833	1162	1645	2607	1837	2474	1141	1366	1424	2073	1048
ENSG00000076641.4	159	186	2647	29080	163	1106	1156	710	6609	711	764	576	593	322	2777	9348	643	3197	452	905	10	2872	1360	428	1699	585	73	1038	360	3301	1171	23	2549	1887	2556	731	730	251	1658	1905	262	347	2325	410	3055	4266	2363	1863	4145
ENSG00000076650.2	699	553	652	430	476	363	619	483	523	492	429	667	1065	539	500	615	654	1182	522	221	790	729	329	347	705	522	396	600	705	318	878	331	342	530	361	784	639	407	699	880	531	758	939	820	927	248	465	649	846
ENSG00000076662.5	525	215	184	227	1059	132	709	115	590	29	147	69	464	379	219	267	228	595	54	360	916	220	229	275	178	162	226	341	1012	353	197	189	376	191	378	170	191	322	221	285	355	636	181	313	336	365	55	445	199
ENSG00000076685.14	4453	2981	4950	1137	4789	3708	5233	2839	2104	4469	6109	12329	6539	7019	3797	4320	4593	4143	3955	2629	3554	4520	4562	2310	4953	7789	1853	2677	7944	3827	8218	2218	1257	4284	2994	9374	3992	3320	4799	5303	3864	5174	5061	6916	4152	4574	3027	6534	5580
ENSG00000076706.10	194606.99	114337	6209	21638	102794	2668	5628	3888	588	8789	12721	2086	2479	102245	18098	6754	27580	4812	534	148483.81	221640	135	3401	138594.99	1367	1839	45509	2603	3035	4686	16438	78062	55	290	8445	2610	29305.06	176249	380	787	5374	33026	1214	94346	1107	1564	1343	1434	1576
ENSG00000076716.7	29	17	137	0	23	725	84	323	291	590	4982	60	9	425	3410	197	2662	101	244	393	3	70	874	407	23	39	5	2	1639	546	6704	5	862	149	854	110	1417	8	340	166	7	50	440	28	155	510	78	635	141
ENSG00000076770.10	840	696	1354	883	641	546	616	1187	978	1191	492	2198	170	243	638	200	1169	462	1201	479	531	871	776	440	2137	1096	161	662	279	1557	917	306	1904	1744	1768	1425	1154	667	1056	1697	28	214	607	731	1340	438	657	9800	3727
ENSG00000076826.5	5	1	0	0	1	0	0	2	0	1518	1952	600	0	21	672	0	1623	0	0	85	4	5	0	32	0	285	9	0	3	4	1846	0	0	0	100	869	803	0	0	0	6	2	2	24	0	0	0	1	1
ENSG00000076864.15	0	7	4	1030	10	9	6	0	21	56	897	522	3	3	5165	65	242	10	5	72	6	19	29	1	52	100	0	0	38	35	809	3	2	6	15	311	104	0	18	13	7	2	126	8	62	27	20	100	40
ENSG00000076924.7	3105	2649	2595	2664	2563	2348	1776	4867	4349	3140	4014	3158	3532	4400	6715	1522	4286	3618	1246	2869	3371	3378	2845	2626	1907	2062	2552	3717	3242	1687	4700	1211	3391	3665	4666	2134	4388	3578	2076	4123	1967	3676	2997	5834	3592	2650	2672	2770	2556
ENSG00000076928.13	7692	3783	2713	1945	5425	2252	2515	3534	5435	5046	6756	2951	5346	4500	5848	2850	5889	6772	1478	4898	5742	3635	3446	5305	2152	1938	3371	6579	4331	3471	5693	2004	2601	2806	7117	1906	6683	6421	2428	4801	3863	5448	4052	9181	5780	3942	2853	4393	2325
ENSG00000076944.10	1210	1049	295	365	1101	625	55.12	385	287	2050.86	3348	1991.61	1237	1485.39	4417	1171.77	2367.77	3082	40	1484	1303	265.89	943.3	1579.18	44.7	1618	784	689	1850	1072	4052	693	44.36	7.62	2055	2738.22	2740	1770	67	390.92	1143	1870	198	3346.08	326	1643	66	832.27	27.21
ENSG00000076984.13	1138	866	1087	730	1131	610	864	1213	1029	650	1754	1950	1709	1385	2392	973	947	1361	172	867	1612	1408	619	1123	735	1128	852	973	1193	883	1873	501	745	1087	1209	1356	1672	1534	1077	1103	1289	1583	1169	1976	1410	768	1069	1759	947
ENSG00000077009.9	0	0	0	0	0	0	0	0	9	0	0	0	0	0	0	0	0	0	0	0	0	0	0	0	0	0	0	0	0	0	0	0	0	0	0	0	0	0	0	0	0	0	0	0	0	0	0	0	0
ENSG00000077044.5	3278	1262	1293	922	4209	1600	839.01	1786	1851	1053	2748.99	3048.6	3915.35	2864.9	4337	2298	2407	1547.62	280	1280	1857.25	1540.5	2101.95	1490	2862.93	2397.75	1030	947.73	2632.32	1681	3238	1028	949.15	1171	2090.44	2927.64	3647.36	1060	1495.71	1235	1613.25	3348.59	2179.42	2796	1785.94	1377	855	1561	2085
ENSG00000077063.6	1	0	123	2369	1	47	101	1009	220	147	772	30	128	0	4844	6	349	116	343	139	5	1617	27	159	110	53	0	31	3	0	755	9	166	212	660	63	318	77	506	2560	0	15	836	45	645	0	67	57	73
ENSG00000077080.5	0	0	0	0	0	0	0	0	0	0	0	0	0	0	0	0	0	0	0	0	0	0	0	0	0	0	0	0	0	0	0	0	0	0	0	0	0	0	0	0	0	0	0	0	0	0	0	0	4
ENSG00000077092.14	3488	326	1721	356	2221	113	521	1396	1205	128	153	4	52	2382	1203	6307	500	7571	209	2179	3569	1389	215	1004	902	35	240	3329	3458	192	234	577	107	185	3812	17	141	2094	1088	1875	201	41	2895	167	5262	303	1446	369	1272
ENSG00000077097.9	9094	8498	9245	5141	10095	4575	11336	7429	6956	7119	8885	7589	25709	15444	6516	10461	10652	14545	7639	8075	19756	8027	7224	6288	12651	6053	5349	10809	16878	6160	14744	7438	6007	9735	11157	7278	9815	9999	10663	17501	8989	19484	16613	27894	16285	5733	4922	6971	14739
ENSG00000077147.10	13853.61	14361	20762	6805	16358	8613	24904	10787	17189	11497	13324	33275	30060	20552	11261	37856	16694	51450	7219	10480	32656	18812	14268	9215	20762	26603	9358	14432	28531	13381	17079	19960	10282	12542	15608	21842	12971	18884	20333	24688	22014	28882	34895	25935	32157	13568	11154	15921	27518
ENSG00000077150.13	4470	1959	2702	6359	2010	1567	1082	1599	3495	2504	7847	1673	1884	6736	3720	2086	9107	2058	464	3302	1962	2489	1702	5200	1262	620	1641	2604	2361	2161	9441	929	1337	1544	6687	1303	6534	3352	1598	1294	1740	2798	1565	4391	1498	1174	1467	1762	1740
ENSG00000077152.5	1741	492	718	724	855	74	696	445	1443	1127	219	177	221	347	212	445	3700	2904	16	407	1183	117	105	384	207	108	247	1384	455	206	490	761	677	174	1695	49	3356	1609	181	1329	166	1195	937	980	3331	250	47	301	429
ENSG00000077157.16	573	768	2654	1368	726	753	1200	817	1887	712	822	942	996	1449	1072	2466	733	1144	2011	551	832	2039	746	828	6415	944	479	1571	1545	756	930	354	1271	2117	920	1718	452	830	1675	2416	649	769	2855	952.27	2018	604	1080	787	9253
ENSG00000077232.12	18222	19441	17565	8095	13907	6049	18848	4622	23333.07	9889	19150	29992	25464	19748	9879	28938	16903	22698	11787	14108	25258	11638	8917	11818	24916	18562	12638	17891	22288	12828	29127	13060	10321	9461	21547	18551	15528	18658	15168	18952	14659	24915	27279	25591	20476	11996	10629	14913	26968
ENSG00000077235.13	15088	13516	15521	14774	12206	6596	15751	9467	13978	11400	11790	14888	18275	20906	18854	13975	10428.98	21043	5725	11599	22841	19092	8736	12298	10010	9270	9758	13473	16815	7630	13732	7409	10147	18039	15958	13014	11396	12417	12811	19745	13104	20212	21568	27220	24284	6651	11833	9168	13254
ENSG00000077238.9	8637	2970	1780	1918	4360	1423	1709	5062	2539	8880	5168	4218	1658	5218	3553	2953	4615	4974	474	9229	3312	2480	1799	11111	1688	2400	2459	2773	5304	8024	6052	1566	1661	1119	6974	3030	3751	9147	2004	1847	1145	2441	1471	3238	1598	9296	3070	6639	2411
ENSG00000077254.10	5446	4723	10776	7504	6438	5806	7513	4622	8919	2973	4714	6182	23307	12174	3780	15868	4521	12637	4188	3070	9153	12064	8709	2853	9479	3932	3380	5365	8763	5992	6585	5783	8552	7465	6065	4892	5054	4578	15061	15771	18270	18465	12101	16695	12093	6419	7105	6916	11285
ENSG00000077264.10	40	25	489	4	93	25	639	17	10	159	391	25	343	461	534	272	952	691	144	215	146	149	46	55	23	10	13	13	775	3	547	14	35	109	109	2	896	18	347	251	309	374	435	348	223	0	144	21	120
ENSG00000077274.7	0	0	119	0	0	1	1	0	0	1	32	0	0	0	23	6	152	0	0	0	0	0	3	0	78	1	0	14	0	0	40	0	3	13	19	0	43	0	4	17	0	0	3	0	6	0	5	0	35
ENSG00000077279.12	0	0	0	635	0	7	3	0	0	0	0	0	3	0	4	0	0	0	0	0	0	0	1	0	0	0	0	0	1	0	0	0	0	0	0	2	0	52	0	0	0	0	0	0	0	0	0	0	10
ENSG00000077312.4	4714	1537	1104	749	1186	714	743	3786	1898	3487	2656	660	940	714	4377	382	5303	1369	145	1932	1217	932	1176	1608	910	328	1194	4778	928	1402	3371	344	931	1617	5444	554	7111	3635	429	1298	472	1521	970	1750	1335	1489	917	1875	769
ENSG00000077327.11	0	0	0	4	0	0	0	0	0	0	82	0	0	2	33	8	0	0	0	0	0	3	0	0	68	0	0	0	0	0	87	0	0	2	0	1	5	0	4	8	0	0	0	0	9	0	2	0	132
ENSG00000077348.4	825	393	292	419	441	454	269	470	729	879	762	880	578	273	682	305	708	830	192	364	813	240	416	282	186	1419	274	778	536	559	905	278	719	246	656	394	1260	1126	420	392	464	874	376	329	526	453	120	522	200
ENSG00000077380.11	13509.69	9350.33	8240.98	3841.81	12870.12	3677.86	9580.38	5958.93	9477.62	8517.73	7682.92	7089.83	19630.62	18243.45	7075.8	11615.14	13418.36	18773.04	4735.9	10302.79	17309.29	7797.01	6062.94	8661.83	7339.52	7484.7	5729.69	10493.01	12624.83	5041.95	11674.65	7170.44	4167.12	6658.36	10653.57	7182.61	10785.69	12990.43	7819.48	14988.38	11187.77	19049.57	11319.78	20838.96	15189.92	6442.6	4761.46	6949.93	9283.81
ENSG00000077420.11	0	0	275	1	1	437	0	0	394	0	8	0	0	5	14	35	84	9	279	50	0	565	691	25	582	0	0	0	0	14	116	2	1017	1030	3	0	294	0	337	547	3	2	21	6	11	16	285	0	111
ENSG00000077454.11	2081	907.1	1196	1231	502	940	436	3453.27	679	1634	3054.64	392	450	651	3211	500	3065.88	1026	234	1802	640	932	1400	2281	387	212	770	2487	454.85	1159	2978	248	377	732	2413	484	2196	2022	397.9	1017	500	635.75	832	960	972.16	2028	671	3065.71	408
ENSG00000077458.8	926	1601	842	1657	1325	274	838	690	1132	329	1232	1085	2810	1236	527	1362	1062	1017	570	341	1512	812	512	673	1375	1043	887	807	940	249	1757	866	888	1570	652	1085	1188	796	1054	1713	1329	2121	1585	1790	1889	649	643	748	1520
ENSG00000077463.10	1203	344	386	276	505	389	536	985	731	1082	1685	423	530	579	1859	444	1423	826	213	654	638	715	428	773	257	325	444	1159	624	407	1952	211	448	427	1078	524	1256	870	456	548	407	775	549	683	600	900	332	1004	346
ENSG00000077498.8	0	8	0	64492	0	0	0	0	9	0	0	0	2	0	0	0	0	0	0	0	0	0	0	0	0	0	0	0	0	0	0	0	2	3	0	0	0	0	0	0	0	0	0	0	0	0	0	0	0
ENSG00000077514.4	1499	1203	1264	615	1600	332	1394	1005	1619	767	997	1113	1951	1491	473	1507	2136	2117	465	631	2004	980	696	772	1422	597	616	1209	884	545	1202	1019	1256	984	1627	805	2241	1452	1672	1766	1167	2278	1457	2140	2884	543	633	610	1960
ENSG00000077522.8	2	17	0	20	0	0	104	223	723	0	23	1	0	3	4	58	97	27	11	0	146	9	1	0	0	8	7	0	26	66	16	0	0	9	0	1	4	0	4	3	3	0	8	11	7	94	0	153	0
ENSG00000077549.13	5116.67	5791	6729	3814	5548	3639	10213	5484	9562	2835	3175	4467	13376	5968	4959	5121	3274	7584	2342	4758	6467	7300	5582	4921	6422	3577	5010	4812	8720	3324	3673	2715	6104	8973	7671	5044	3484	5021	4007	7907	6133	11279	7184	7016	6826	3622	5033	4898	7318
ENSG00000077585.9	292	392	705	5471	218	509	673	382	591	565	1482	297	925	676	1543	1535	747	531	149	777	415	1083	603	848	882	312	428	654	468	774	1747	143	639	655	1000	307	482	206	817	495	759	583	1077	460	541	524	342	1332	1190
ENSG00000077616.6	30	24	149	138	16	90	9	388	33	0	25	0	96	29	60	66	26	42	402	52	7	137	138	165	23	0	1	20	17	27	32	26	48	394	214	1	51	2	83	217	39	55	168	40	509	76	373	312	12
ENSG00000077684.11	2671	2286	5783	857	3029	2634	2884	5193	4808	585	2703	1418	2597	3255	5783	6483	3653	7938	1574	1555	4682	4158	3750	1382	4348	1047	1834	2924	5147	5213	3433	3124	3031	3942	5689	1078	5008	3521	5800	5490	1401	2887	4455	4086	5455	4515	2941	4560	4237
ENSG00000077713.14	2273	1474	1719	1486	923	1131	962	1045	2318	939	450	1933	1774	1363	1470	2479	1195	2811	439	1360	1724	3075	1427	1384	2169	1215	898	1776	1878	1083	941	565	2149	2193	2507	2955	1515	2341	2290	2630	1493	2288	2628	2538	2909	1616	2170	2194	3214
ENSG00000077721.11	2821	1369	1866	1145	1251	902	1552	1943	2136	1456	1174	1255	1972	2021	1620	1454	2127	2179	515	2303	1597	1252	1831	1483	1882	959	813	2074	1590	1388	2035	524	1142	1640	1849	1288	1498	3258	1418	2354	1112	1732	1571	2262	1633	1459	1041	2134	2642
ENSG00000077782.15	15051	9977	11477	7620	7038	9409	11314	12327	16814	1086	5306	251	15234	12064	11420	13822	12038.58	10770	10537	10349	9070	38687	12102	12083	28898	320	8604	18444	4835	6713	6356	3183	7738	31085	12685	202	5110	13073	12763	29378	11704	11433	15983	16966	14633	9404	23435	25546.99	33823
ENSG00000077800.7	0	0	0	0	0	0	0	0	0	0	0	0	0	0	0	0	0	0	0	0	0	0	0	0	0	0	0	0	0	0	0	0	0	0	0	0	0	0	0	0	1	1	3	0	0	0	0	0	0
ENSG00000077809.8	17624.34	15476.23	20609.26	13330	14018.62	12357.99	10132.38	17088.88	13138.8	15743.73	17641.77	7967.28	29576.18	23891.74	30659.39	15636.67	24619.39	14059.02	10263.31	15663.96	21480.28	20840.94	17365.65	14465.12	18386.15	7209.24	13609.42	13126.45	14650.27	14463.38	23516.1	7699.84	11256.37	18947.95	16170.87	7263.6	16472.78	16405.16	15790.52	20892.43	21889.68	24576.66	14258.42	35343.21	12451.56	12076.75	11336.96	17692.28	24113.29
ENSG00000077935.12	0	0	0	0	4	0	13	0	0	0	15	0	0	0	1	0	84	11	7	0	0	1	0	0	7	0	0	0	3	0	15	11	7	0	0	0	0	0	2	0	0	5	5	2	2	0	0	0	0
ENSG00000077942.13	8	16	13440	186	12	14004	1959	26564	2617	3634	1976	976	8	25	8947	1498	4393	653	13022	441	8	52004	16786	327	6701	1340	28	17811	5661	669	2595	111	11277	15148	11341	1641	1521	27	18579	21718	18	25	14290	66	7945	1372	24013	16607	7489
ENSG00000077943.7	104	67	302	0	61	1760	66163	308	7	0	24	0	4315	63	78	23881	11	5608	314	1785	57	367	2383	318	0	13	24	0	433	1005	31	3	0	13385	15	0	0	34	309	1349	178	490	591	73	318	1353	14524	946	3
ENSG00000077984.4	0	0	0	0	0	0	0	0	0	0	0	0	0	0	0	0	0	0	0	0	0	0	0	0	0	0	0	0	0	0	0	0	0	0	0	0	0	0	0	0	0	0	9	0	1	0	0	0	0
ENSG00000078018.15	5273	3454	4845	189	1466	658	1257	603	406	805	6315	3178	2432	2203	5140	893	1448	917	241	1557	2558	1499	714	895	5	1382	2053	4107	4236	315	9408	519	64	1494	884	6001	508	3366	3116	2564	152	3981	2776	1319	563	516	1233	1193	14
ENSG00000078043.11	1558	2806	4396	2369	1763	1106	1953	1843	4978	945	1101	1515	3543	2748	1253	3652	1598	2807	2403	1076	2291	2929	1438	1420	4289	1673	1846	1291	2533	1866	1494	1103	2831	4498	1567	1758	1459	1594	2678	2807	2108	2906	3694	2285	2963	1290	2373	1669	5438
ENSG00000078053.12	1	4	68	88	0	498	26	510	165	0	33	0	0	17	64	52	7	148	126	0	14	654	522	20	304	0	0	7	35	83	29	128	934	652	335	0	11	0	162	474	1	14	182	2	160	99	1443	168	490
ENSG00000078061.8	3309	1041	1244	1065	695	1200	788	1830	1387	2236	2760	766	981	1314	4518	970	2481	1549	348	1659	1012	1444	1789	1947	1094	597	995	2465	972	2119	2544	431	863	1367	2939	828	3214	3160	851	1268	1015	1163	963	1649	967	1757	1013	3119	1281
ENSG00000078070.7	1095	1022	1071	1243	2171	734	2501	1086	1499	1303	1254	1548	3447	1990	1278	1539	1198	3032	917	688	3355	2461	1230	636	1518	1463	692	1484	1631	633	1470	1701	1231	2083	1013	1662	1018	1481	1919	3524	1938	3486	2186	3453	2842	662	1105	1042	1958
ENSG00000078081.3	2149	235	22	1	1194	0	0	10	10	26	3135	2393	690	7342	765	30	115	17	6	197	130	15	0	398	13	977	1082	99	3	8	3728	136	0	0	66	2294	67	1915	160	3	4545	3873	96	12000	8	0	0	33	17
ENSG00000078098.9	1100	208	10723	338	812	1016	6611	905	6454	253	225	146	8	633	1907	22772	71	4080	4581	2373	126	7270	1532	647	13516	77	25	6050	18573	699	238	176	6489	5211	10475	5	4	1862	6759	10914	7	145	19906	83	14823	284	8646	4204	15812
ENSG00000078114.14	1324	227	11	16	496	2398	38	558	2620	1992	1111	1707	99	693	598	46	797	24	174	71	821	13	4010	84	7065	2629	293	488	232	1088	1456	143	104	50	1448	7710	177	1319	249	30	1013	466	41	652	29	538	2	2577	7681
ENSG00000078124.7	6832	5641	3610	1692	2540	852	1457	2274	2539	1592	2314	3031	8677	3123	2640	1591	2068	3415	633	2050	4480	1247	1091	1701	2291	1785	2801	1793	1215	1696	2869	1318	1771	5454	1857	1321	2364	6126	1547	2111	2670	7476	2022	6413	2149	1544	4898	1914	2501
ENSG00000078140.9	3149	3481	3069	1703	2987	1558	2755	4047	4187	2930	3202	3938	5243	4958	2572	3067	3533	5650	2048	2671	4906	1854	2581	2683	4291	3131	2030	2103	3592	2694	4558	2103	2191	2488	4074	5075	4509	3680	2811	3548	3273	5244	3794	6889	4176	1878	1974	3085	4092
ENSG00000078142.7	2091	4405	5658	4119	3046	2142	3040	3407	6486	1944	3425	2579	9396	6908	3150	8465	4037	5913	4196	2759	5286	4287	3492	2648	6702	2387	3362	2731	4386	3532	4068	2427	4421	5201	2910	3200	2196	2388	4460	6544	5342	6927	5684	6328	5078	3109	3137	4125	8040
ENSG00000078177.9	1447	2490	2130	784	1290	735	1307	956	2497	1227	2850	3363	5226	2591	1806	838	1949	1060	4071	1198	3006	1278	827	1100	4623	2478	1289	1042	1596	425	4120	846	1624	3283	1515	1772	1815	2177	1722	1894	2169	3375	2715	3232	2286	698	1866	1375	4570
ENSG00000078237.4	2081	1512	1415	911	1362	234	458	301	1302	1239	1264	1903	1795	1490	472	1092	529	2071	246	1761	2554	1137	323	941	537	937	918	1869	1374	850	1840	926	442	484	1415	1100	1024	2128	1163	706	960	2480	1015	1750	636	392	439	836	880
ENSG00000078246.11	2212.05	2104	3471	1662	1291	1546	1755	1883	2865	1106	1706	2504	3047	1500	2653	1770	2797	1965	1218	1450	1811	2624	1823	1473	3066	895	1419	4607	2136	1508	2056	675	2630	4661	3277	1806	2008	1681	2935	3559	1690	2920	3796	2342	3314	2284	4103	2959	4166
ENSG00000078269.9	10442	10529	9716	476	8274	1078	42760	2988	6806	1188	2860	1990	6863	9784	11927	12128	4975	17297	1718	13815	24627	16058	1410	14120	13408	1580	7190	3008	20031	1765	3378	8927	5292	9567	9648	1493	4605	11244	11810	10701	3519	8751	8872	7951	12435	966	7610	1482	16151
ENSG00000078295.11	0	0	12	406	0	0	7	16	0	1	30	4	2	0	0	0	30	0	4	0	0	41	0	0	1600	5	0	0	3	0	24	0	24	194	17	1	0	0	22	21	0	0	18	0	55	0	8	0	2083
ENSG00000078304.15	6411	5181	8395	5861	5537.98	4045	8014.06	5780	7973	5095	5580	8384	15121.99	6159.97	5340	9815	5455	11132	3356	4969	8514.16	7590	6674	3676	10072.97	6474	3670	8263	9280.98	4741	8416	2865	5956.24	10589.08	6878	9081.99	5131.25	5153	8865.99	12698	8030	12085.07	9625	9443.88	10408	4918	5320	5902	12793
ENSG00000078319.7	184	123	118	68	238	94	214	148	207	306	167	190	503	238	209	158	287	228	33	217	294	76	47	64	123	174	114	197	309	86	282	78	100	93	129	170	189	87	154	201	303	358	156	288	233	91	81	161	146
ENSG00000078328.15	0	0	0	0	0	0	0	8	233	0	12	0	0	0	8	0	0	0	3	0	0	0	0	0	0	0	0	0	0	0	0	0	0	0	0	0	0	0	0	0	0	0	0	0	1	0	0	0	0
ENSG00000078369.13	22643.98	11668	9720	8009	11041	6941	10755	11440	11997	12512	23552	12152	13590	21689	21714	7382	21292	16037	2025	17201	13881	8438	9576	18341.86	6988	11250	8183	12611	13699	11806	29253	3428	6270	9566	23316	13105	18763	19637	5801	12817	12007	15412	9228	22852	10824	12506	6452	17023.68	8332
ENSG00000078399.11	812	542	919.02	0	332	0	0	65	771.66	0	1609.2	0	296	323	3567.68	0	4815	1	0	587	63	0	0	900	777.7	0	297	1081	0	0	2085.47	642	336	8	74	0	3306.17	1651	3	8	116	287	442.37	576	626.1	0	5	150	1307.18
ENSG00000078401.6	16382.01	19077	133	0	18646	112	348	14	15	533	2985	1608	3906	35410	885	3640	1144	7911	76	7640	18228	22	49	15286	34	197	24912	3	31427	4299	4277	15825	3	244	270	683	1405	7094	15	62	23691	8933	58	20074	98	6306	232	1614	38
ENSG00000078403.12	2833	3061	3161	3134	2387	1215	1875	2322	3225	1635	3053	3045	5181	4065	2805	3127	2284	2440	1343	1859	2660	2708	1738	1998	3013	2538	1914	1753	2435	1511	4015	1253	2305	3945	1992	2251	1855	1971	2607	4114	2875	3703	3468	4417	3552	1677	2137	2366	3968
ENSG00000078487.13	40	15	31	139	52	91	146	58	52	103	93	284	88	56	25	125	110	111	72	47	34	83	129	71	160	84	36	47	79	41	69	17	49	101	38	101	30	3	210	85	48	64	85	45	93	46	86	46	146
ENSG00000078549.10	0	9	0	0	0	73	16	0	0	0	4	0	14	0	0	10	0	8	0	0	234	0	85	0	0	0	13	0	0	0	1	26	1347	28	0	1	0	0	0	0	0	13	0	0	2	0	0	0	0
ENSG00000078579.8	0	0	4	0	0	0	0	0	0	0	22	0	2	0	7	0	2	0	0	0	2	5	0	0	0	0	0	6	1	0	12	2	0	4	3	0	2	0	1	0	0	1	6	1	8	0	0	0	0
ENSG00000078589.8	0	0	0	0	1	0	0	0	0	0	0	0	0	0	0	0	0	0	0	0	0	0	0	0	0	0	0	0	0	0	0	0	0	0	0	0	0	0	0	0	0	1	0	0	0	0	0	0	0
ENSG00000078596.6	12558	914	3	11098	10932	171	8	7	4	0	0	99	6615	4268	28	10	171	22	73	5962	1290	189	151	2971	251	57	352	0	2	3321	0	42	49	14	54	224	39	7568	6	76	1645	9256	7	1921	29	2129	0	1164	173
ENSG00000078618.15	7111	4078	8869	3632	4582	3985	5747	4565	8170	6620	5646	11767	8665	6570	7564	9593	5693	19396	6328	4826	7839	8952	5811	4525	6911	6259	2865	11000	9429	5023	8076	3540	5366	7712	9533	6836	6438	10483	9165	16183	4333	8919	13427	13038	14704	5258	4376	5924.01	7841
ENSG00000078668.9	7570.99	4508	5616	4454	6607	1349	5354	2067	8190	5006	2214	4117	9292	5755	2840	4911	7286	9303	2207	3681	9881	3533	2575	2646	3244	3716	2564	5492	6174	2385	3324	5719	3333	3959	4432	4217	7387	8540.03	4485	8510	5511	11056	5497	8140	8865	2484	1878	2854	5030
ENSG00000078674.13	9601.81	16638	14277	9156	13317	4593	19581	6402	13865	5513	13012	26751	32283	21436	6007	17645	10017	18978	12413	7889	25362	13713	8166	7737	19551	14848	10289	9183	13089	5254	17024	10707	12132	17988	7921	15361	8663	9093	22340	27379	15083	25713	25612	31947	29376	4276	8667	6441	25989
ENSG00000078687.12	1486	2146	851.47	817	1112.24	1093.79	1877.8	982	549	161.73	1179	148.84	3009.53	2439	1681	495.4	553.87	1218	877.12	914.93	1879.77	863	1554	1093	1584	136	1748	617	1853.7	602.16	1626	596.57	574	1693.8	608	219.62	644	931.46	762.52	1443	2003.18	2445.88	988.75	3075.49	1276	805	960.55	979.24	1788
ENSG00000078699.17	924	1043	900	1369	737	1105	686	817	1366	809	2164	1299	1637	1568	2220	933	807	952	869	1290	854	1383	1583	1548	1644	795	961	544	1011	734	2359	461	677	2231	1234	923	644	891	1251	1981	960	1225	1459	1287	1044	639	1281	878	2323
ENSG00000078725.8	30	14	6	0	16	1437	148	20	287	0	61	26	314	10	53	33	298	0	134	1	2	6	2287	7	488	166	2	1	26	2	33	0	342	329	0	6	158	0	48	5	9	45	494	25	291	0	142	38	866
ENSG00000078747.8	8452	9823	13939	6101	8779	3697	9676	5253	10829	6859	7429	18769	17176	11906	7340	15011	8559	16624	4186	6265	12868	11160	5324	5163	11058	13524	6392	10723	13168	5738	10505	6460	6893	10100	9699	12808	8922	8808	11780	15507	10491	14569	16642	14401	16784	5885	8901	6252	14026
ENSG00000078795.12	0	4	0	3	0	0	1	0	6	0	0	0	0	0	0	0	0	10	0	0	0	2	0	0	5	0	0	0	0	0	0	0	0	0	0	2	0	0	5	0	0	0	4	1	0	0	0	0	2
ENSG00000078804.8	1481	966	515	936	1058	675	554	2029	294	384	2436	253	638	1713	3460	266	654	235	148	2257	571	611	967	3231	1611	66	554	795	567	1137	2316	235	192	1074	1175	408	468	759	385	695	672	983	224	1705	218	698	574	1065	1255
ENSG00000078808.12	14397.01	5643	4939	4111	7815	9524	7329	10015	7857	8205	7988	5414	8776	10929	17621	8175	10266	7939	2928	13237	9376	12572	11135	12121	6384	4410	5418	12990	9711	12085	10604	3860	5613	6278	16604	5370	10138.97	11771	6169	10195	7884	9659	11558	12485	7519	12816	5620	16025	7731
ENSG00000078814.11	0	0	0	14	10	1	21	0	37	4	33	9	3	10	49	2	1	3	31	0	4	28	1	0	13	7	1	3	12	0	6	0	9	35	0	6	2	0	33	11	5	0	12	3	14	2	23	25	8
ENSG00000078898.6	0	0	0	0	0	0	0	0	0	0	0	0	0	0	0	0	0	0	0	0	0	0	0	0	0	0	0	0	0	0	0	0	0	0	0	0	0	0	0	0	0	0	0	0	0	0	0	0	0
ENSG00000078900.10	0	4	0	0	4	0	0	8	18	778	9	0	1	10	0	0	0	2	0	0	1	3	1	33	0	7	0	28	0	0	11	0	0	0	27	24	0	0	0	0	4	0	7	0	5	0	0	0	11
ENSG00000078902.11	4388	2031	1987	4078	2237	2161	2231	1980	2746	6761	5320	3273	3003	4114	6217	1936	2314	3255	1069	4291	3043	3821	2945	3893	2033	3000	1900	2190	3433	2861	5341	984	1639	2821	3304	5207	2647	2716	2530	3133	3033	3245	3255	3418	2414	2319	2642	3884	2287
ENSG00000078967.8	1571	880	985	867	423	547	908	217	1048	191	1578	788	674	594	1320	911	1445	553	582	786	740	868	585	515	1569	319	759	483	767	517	2030	172	672	1715	869	310	1274	979	592	623	709	737	512	772	334	416	903	1670	1766
ENSG00000079101.12	0	0	0	0	0	0	1	0	0	0	5	3	8	7	116	3	0	0	0	32	1	2	0	0	4	0	0	0	3	3	15	0	0	0	0	0	6	0	0	0	0	2	0	3	0	0	1	0	14
ENSG00000079102.12	68	711	1357	2	299	753	316	965	413	0	51	0	3356	1613	33	329	0	389	838	12	858	1069	1014	147	1534	1	612	306	225	198	41	377	1124	5477	232	0	0	34	1508	2294	2046	1646	1147	2651	741	234	2381	991	2146
ENSG00000079112.5	0	0	0	0	0	0	0	0	0	0	2	0	0	0	76	3	83	0	1	0	0	0	0	0	0	0	0	0	2	0	37	0	0	4	0	0	8	0	1	0	0	0	11	0	21	0	5	0	5
ENSG00000079134.7	1193	1172	1455	728	1177	361	1237	651	1518	1030	1285	1754	2674	2196	415	1405	1477	2336	1615	854	2656	1139	712	920	1708	1383	693	869	1562	506	1557	1400	1314	1467	941	1557	1659	1521	1705	2311	1407	1667	2019	2207	2576	576	772	904	2038
ENSG00000079150.13	569	588	1402	679	318	1434	1911	3478	1331	154	460	18	2373	833	1238	3006	672	1958	1385	613	1154	1629	3016	483	1526	55	478	1334	2416	899	814	447	962	1154	2047	14	517	1175	1839	1852	689	1066	2037	546	712	1388	668	2160	2116
ENSG00000079156.12	167	919	875	729	204	448	100	313	1122	268	588	2297	1181	2871	494	378	542	229	161	63	1026	326	794	185	454	1015	711	967	208	1188	879	186	426	508	1162	2245	510	243	523	453	967	1681	765	786	1053	839	562	1102	691
ENSG00000079215.9	33	0	88	447	30	939	10	636	654	340	43	958	0	5	45	356	141	112	115	2	2	583	1348	0	7	187	0	0	3	518	36	9	490	924	397	98	137	10	170	633	0	0	23	0	117	193	3204	718	35
ENSG00000079246.11	26446.99	31189	27634	22875	27541	8200	28133	17332	36494	23992	27033	18022	46798	32022	17527	27389	40487	50139	9693	18544	53951	21356	11557	13514	22634	20384	18028	30121	32867	13148	36188	20837	20739	20512	32288	15572	42491	33884	19865	43657	22798	52689	28522	47463	50901	13143	14210	14096	27237
ENSG00000079257.3	1726	1713	885	696	4790	1447	12425	12211	971	113	106	53	1679	1833	3266	4443	486	5842	1830	2104	4130	6270	1976	2330	1851	220	1443	10199	2345	717	163	2136	775	258	16906	121	427	4684.9	18834	5864	1602	1612	8499	3686	7148	1163	273	725	7699
ENSG00000079263.14	20.55	2.24	10.07	2.04	3.07	0	7.6	0	13	0	72.1	5.09	4	1.02	23.51	0	124.37	26.09	22.34	10.12	3.03	11.16	1.02	0	4.56	1	0	25.19	17.32	0	200.53	0	2	16.02	34.13	3.02	312.59	0	14.32	26.34	3.81	6	62.66	3.01	104.59	0	7	0	9.06
ENSG00000079277.15	1057	1239	824	947	1606	470	1025	662	793	1304	1332	1854	2149	1397	1345	654	1068	881	414	1319	1926	1579	698	1166	1325	1160	958	796	1314	373	1512	681	839	1940	576	1610	1497	729	1262	1439	1113	2268	1391.27	1751	1011	488	1116	604	1217
ENSG00000079308.12	10879.52	4081.16	21082.25	1267.55	4652.71	16276.76	13014.48	6734.12	19733.02	607.05	14729	2	11341.74	14710.64	18490.76	22833.17	4444.92	19174.95	3694.87	4409.88	7319.18	21464.68	19022.34	6544.4	17963.25	175.27	3961.9	6370.2	26295.72	14492.87	17273.33	1211.02	9948.76	13712.77	21766	259.49	1409.2	5206.19	8900.61	21159.79	23292.85	8412.41	13166.2	14958.02	9094.39	12656.41	11235.37	17104.89	19455.46
ENSG00000079313.7	1933	1913	1328	1341	962	776	482	1692	2029	1852	2563	825	898	1108	3767	400	1998	1072	763	2278	884	1054	840	2895	682	308	1884	962	581	587	2635	418	969	1419	1677	437	2183	1629	452	1062	830	1065	706	1912	1114	967	1058	1237	849
ENSG00000079332.10	7730	9707	30415	8076	15660	10436	29953	7790	19313	5935	4369	17408	26202	16470	5399	40567	6573	39657	7373	5591	21850	24443	16527	5377	23301	13680	7607	9815	36538	18274	5849	10719	13847	20510	10837	15390	7178	8361	30254	24919	20977	24795	21580	14438	19777	15667	19895	24272.32	29958
ENSG00000079335.13	1564	1881	376	414	2445	167	146	175	479	278	565	141	1390	1660	660	288	639	445	156	889	1823	368	161	673	302	94	1066	366	330	312	814	996	197	433	539	84	630	1048	420	294	895	1304	438	1737	295	215	177	315	748
ENSG00000079337.11	4167	2833	930	0	6630	67	610	53	224	341	760	674	1676	3611	1916	493	7984	1142	572	1319	3986	1103	177	1923	1406	449	2054	121	675	62	927	1387	97	1624	170	74	925	2573	125	846	959	2294	834	4317	710	151	1228	195	1164
ENSG00000079385.17	1932	210	5	169	100	0	3	0	0	452	348	174	2469	3802	14	2	58	1	16	3462	70	0	0	2360	2	160	297	5	1	36	232	10	0	8	16	158.14	76	699	0	0	3832	2139	5	3323	2	0	46	18	15
ENSG00000079387.9	1704	2152	2984	1775	1063	530	1183	1662	1989	1125	1720	1566	2075	1433	1579	1242	1481	2089	1280	1015	1591	1468	782	820	2766	963	1407	1812	1548	1404	2022	699	1464	2222	2530	1062	2178	2340	1559	2150	1105	2122	1521	2154	2153	622	1631	1230	3297
ENSG00000079393.16	0	0	0	0	0	0	0	0	41	21	0	7	0	0	0	0	47	0	0	0	1	0	0	0	0	27	0	0	0	0	0	0	0	0	0	53	0	0	0	6	0	1	0	0	0	0	0	0	0
ENSG00000079432.3	7759	5422	4105	5383	3974	5915	2783	5886	6043	8118	7200	2451	2783	5234	21507	3721	10224	3180	3749	8729	3707	8153	8342	10425	3938	1341	5041	5969	3111	4370	7675	1461	3400	10547	6348	1523	7665	5556	3836	8174	2159	3413	6294	8919	5558	3607	6326	8162.29	4385
ENSG00000079435.5	1156	210	142	724	748	151	162	288	149	483	320	1472	360	370	181	59	160	241	27	412	428	118	173	254	132	401	203	247	71	98	298	108	164	305	302	443	541	344	43	203	218	518	170	644	227	40	139	154	173
ENSG00000079459.8	9997	7875	15553	8587	12710	2826	6056	4741	4215	29213	9816	9569	8626	7592	8994	6306	8377	6425	8175	4655	7070	6676	4073	3657	3899	10665	3485	28304	12749	4240	14990	9205	7429	14813	21427	7244	21510	5365	12576	13045	7586	24736	31280	22272	25857	3529	7638	8400	5858
ENSG00000079462.3	987	734	578	665	1415	187	513	435	451	2578	2588	455	1491	1022	3630	212	5254	854	363	805	2221	359	226	663	323	993	754	1370	1236	245	2965	514	233	678	1641	862	4258	989	938	1396	894	1880	1193	1243	1801	324	393	512	292
ENSG00000079482.11	800	1132	1815	1624	1623	431	995	464	829	377	750	2082	3882	2233	1299	1486	880	1455	793	633	1867	1341	598	998	1272	644	979	1230	2088	179	1148	849	755	1869	1077	1049	777	854	1243	2099	2053	2460	2519	2574	1838	208	1738	474	1897
ENSG00000079557.3	0	0	0	0	0	0	0	0	0	0	0	0	0	0	0	0	0	0	0	0	0	0	0	0	0	0	0	0	0	0	0	0	0	0	0	0	0	0	0	0	0	0	0	0	0	0	0	0	0
ENSG00000079616.8	4957	2219	1941	1855	4533	460	2188	1891	3382	3464	1434	851	1354	2153	1454	851	7284	5886	153	680	4438	355	604	1022	752	578	1196	4098	1414	1085	1601	2328	2073	952	4434	700	7960	5680	241	4562	824	5023	1905	4831	7962	963	303	688	1136
ENSG00000079689.9	0	0	0	0	0	38	0	0	0	0	0	0	2	0	0	0	0	0	0	0	0	0	41	0	0	0	0	0	0	1	1	0	4	0	0	0	0	0	0	0	0	5	0	0	0	2	0	6	0
ENSG00000079691.15	651	1259	1568	3384	1629	1962	4953	331	2319	2093	2537	3335	1243	338	5046	5141	4717	3657	1836	791	645	6265	3135	773	3488	2100	527	335	3103	6393	3101	382	2453	2282	1579	2452	5245	204	2056	6271	31	303	2023	1661	1598	7613	2450	6492	4391
ENSG00000079739.11	2074	1327	4257	4616	1948	3394	2069	4167	12321	4820	3329	5004	11676	2630	6162	11153	6750	7800	3116	1837	3901	6582	5069	1461	8718	5657	1104	8534	7250	7399	3236	1797	3610	3689	8847	3506	3683	3781	6350	6978	3893	7479	9596	4067	6441	9397	4133	28465	9820
ENSG00000079785.10	5925	5170	6519	3179	6042	2356	6251	3296	6941	3744	3711	5359	9066	8710	2709	5400	5916	13472	3815	3567	11053	4771	3338	3105	6612	6267	3586	6235	9772	4570	4904	4500	3659	3685	5092	5250	5720	6242.07	4206	8675	5796	10605	8533	11701	9217	4697	2782	5524	6966
ENSG00000079805.12	12192	10119	6919	7512	11069	4670	8337	6363	8850	7393	10441	6289	13435	16359	24547	7771	10261	12196	1270	9883	15660	7443	5061	10048	4994	5923	8187	6187	11703	5313	10871	4302	7023	8664	7796	7700	11544.86	10252	5414	9762	9033	15460	8550	21641	11163	5216	6875	8217	5605
ENSG00000079819.12	4552.3	4403	3428	2295	3664	7203	13805	4680	4728	1282	4499	824	31020	15153	4707	13237	4510	20071	4139	4991	7497	10681	10596	5651	18907	342	3663	5573	18684	9238	7281	2477	3343	7192	6782	468	9330	4590	9116	21582	16082	16323	6088	22123	8757	8844	5380	12164.01	25811
ENSG00000079841.14	5	236	150	0	63	0	196	16	8	0	41	2	5072	3428	59	3972	45	2006	1	48	13	29	0	39	737	9	684	0	401	0	68	3	0	78	85	18	58	0	414	9	5563	6007	54	624	34	1	1785	0	1312
ENSG00000079931.10	3	3	1381	3249	15	2641	3074	1711	1500	95	1785	52	2	16	14970	16529	5317	4167	283	591	2	20196	3054	355	3288	63	0	3142	196	871	2573	14	1297	22554	2063	3	3010	0	5577	14224	3	7	5189	37	2630	260	5141	3148	2026
ENSG00000079950.9	3943	5920	5829	19341	5018	2035	7183	1761	4991	2147	5213	4227	17553	10066	4673	10188	4973	6655	2434	3775	6044	5395	2500	3948	8659	4385	3552	2953	10243	2469	5907	3352	4132	7019	3691	4226	4169	3036	5561	8066	12826	12494	8323	9679	7002	2350	4891	4982	11454
ENSG00000079974.13	394.16	561.75	1022.7	219.45	206.62	284.42	213.14	380.72	653.71	516.25	1352.09	226.13	320.39	440.49	1347.08	315.81	1022.47	484.07	209.8	531.5	431.84	509.89	364.95	570.42	626.76	246.4	578.49	757.97	423.18	385.03	1265.77	91.9	512.16	748.01	894.93	288.61	864.13	601	430.3	608.19	297.74	273.9	426.48	321.07	402.72	368.42	929.5	1083.18	919.9
ENSG00000079999.9	8808	5069	4541	4622	9024	4555	7975	6911	6121	4183	5002	4939	11534	10975	8273	6832	3536	11630	2093	4930.45	12114	12563	5668	3805	3618	5120	3733	6384	9187	4457	4858	3821	4735	4436	7331	5428	6487	8178	8104	9124	9438	12796	7654	15197	9261	4195	4011	5355	4912
ENSG00000080007.6	58	49	54	16	43	10	73	6	0	0	82	22	0	79	12	33	47	52	69	0	138	10	35	17	213	7	156	0	19	54	63	26	41	53	34	28	34	13	172	159	57	141	83	97	3	84	92	57	129
ENSG00000080031.5	284	8	125	729	36	114	472	126	277	1	54	101	17	33	464	1895	403	759	180	21	80	581	164	63	302	232	17	544	393	291	177	44	483	126	445	667	103	128	867	416	7	20	486	22	998	401	81	360	323
ENSG00000080166.11	0	16	0	213595	0	1	3	30	20	0	0	2	0	1	22	18	0	0	28	0	0	18	0	0	13	1	2	0	0	1	14	0	13	34	0	4	0	0	14	0	0	0	26	0	4	0	2	2	65
ENSG00000080189.10	1978	1297	1170	1487	1374	1213	1620	2093	1881	2029	2820	2287	2673	1339	4116	2233	2807	2627	867	1671	1518	2105	1683	1543	1367	1529	1014	3432	2228	2248	3801	762	1725	1926	3392	1751	2580	1803	1596	2124	2053	2769	2406	2035	1994	2830	1498	2673	1445
ENSG00000080200.5	2453	2739	2618	1494	2923	1485	2745	5313	2976	942	1359	2414	4455	4398	891	5406	1024	4613	947	1695	3387	4796	1965	2047	2929	1372	1671	1689	2376	2463	1721	1420	1663	3409	1360	1843	781	1313	4039	4557	1997	3544	4209	4738	3528	1771	1869	1778	3978
ENSG00000080224.13	0	13	78	0	12	0	6	0	0	0	1	28	0	5	231	0	35	0	0	0	0	0	0	4	3	8	4	0	0	0	2	0	0	0	0	41	0	0	2	0	0	14	1	2	15	0	0	0	0
ENSG00000080293.5	0	0	0	0	0	0	0	0	0	0	0	0	0	0	77	0	0	0	0	0	2	0	0	0	0	0	0	0	2	0	0	0	0	0	0	0	0	0	0	0	0	0	0	0	0	0	0	0	0
ENSG00000080298.11	792	1014	519	346	1694	242	379	642	445	153	889	453	2743	2530	908	541	555	592	113	1093	1644	326	273	1231	382	380	468	179	927	140	1503	702	237	651	379	269	353	431	637	1018	837	2008	815	3132	851	145	272	216	853
ENSG00000080345.13	8600	14992	15577	8341	10768	4130	10840	8077	13952	6834	8234	13918	24752	17372	4794	16873	11952	24446	11793	7164.98	20168	9872	6620	7487	17472	9201	8775	5212	12288	5714	11787	11960	9301	13065	12043	9004	10475	9549	15630	15776	12660	20649	21150	24871	24475	4324	8689	5545	22252
ENSG00000080371.4	3230	3317	5422	2459	3633	2057	6848	2532	4629	2606	3366	9809	7953	4214	2902	6785	2843	10201	2382	2180	5873	3630	3231	1985	6261	6656	2065	2163	6070	2583	4823	2364	2390	4275	2336	8634	2860	2662	4940	4171	5383	5989	5850	4806	5663	2004	2740	3489	8812
ENSG00000080493.9	3	22	2599	10	8	70	91	6510	544	9	537	12	1	3	6618	5875	1457	5648	264	88	8	3298	122	122	966	38	7	174	1064	1694	544	105	9	46	767	7	1050	0	2782	5966	0	0	590	19	2562	1223	98	1252	1147
ENSG00000080503.15	3907	4335	3727	4140	5408	3851	6461	2593	5282	3769	2140	3292	11369	8705	8371	5447	2209	6178	6675	3031	7169	7607	4679	3634	13415	1633	3415	3058	5800	2255	3301	2523	3735	25433	3406	2629	2419	2625	5544	8751	8855	9331	5321	14418	5721	2681	13686	5366.62	13756
ENSG00000080511.2	0	0	0	56	0	0	0	0	0	0	0	0	0	0	0	0	0	0	0	0	0	0	0	0	0	0	0	0	0	0	0	0	0	0	0	0	0	0	0	0	0	0	0	0	0	0	0	0	0
ENSG00000080546.9	2524	2416	1966	1615	2783	1614	1235	1436	1412	1636	731	2116	6421	3754	767	4128	825	2506	627	1756	4608	3567	2214	1146	1346	1722	1458	2781	4063	1697	1342	1532	1797	1540	1290	1772	599	2336	3148	2861	2338	6514	2547	4999	1572	1077	942	1076	2910
ENSG00000080561.9	2986	3255	1975	282	4485	778	828	416	938	741	1171	1971	4028	10063	1470	1328	637	817	396	1242	3452	322	804	1373	1757	1718	3533	933	1287	674	1122	1900	713	558	1761	2297	465	3121	1529	461	10683	5821	902	9401	822	705	1268	645	2072
ENSG00000080572.8	0	0	0	0	0	0	0	0	0	0	0	0	0	0	0	0	0	0	0	0	0	0	0	0	0	0	0	0	0	2	0	0	0	0	0	0	0	0	0	0	0	0	0	0	0	0	0	0	0
ENSG00000080573.6	10	108	1075	6365	539	8260	1383	1328	10863	406	247	16	95	38	62	4701	7	1195	581	412	1	1062	10146	280	3076	17	2	86	132	11866	195	7	3579	2748	2301	114	0	72	172	959	5	59	383	69	1216	15700	5487	10012	4832
ENSG00000080603.12	6212	4950	3741	2818	4891	6223	3784.83	5040	4420	4823	7530.13	5410.24	6025	11021	9175	3503	5614.33	5229	1822	6115	6443	5674	7388	8966	3141	3394	3967	3085	4040	3446	9072	2061	3036	3958	5330	6079.46	4278.33	4191	3215	6344	5105	5326	5430	13461	6030	2847	3224	4216	3875
ENSG00000080608.9	2030	3019	3471	2041	2252	999	2681	949	3967	3559	2425	5488	3829	3554	1274	4785	3997	5912	2889	1711	4968	2090	1476	1540	3224	4476	1626	2323	4934	1488	4317	2584	2088	1810	3421	3110	4780	2563	3255	3183	2389	2867	4546	4834	6402	1876	1615	2559	3715
ENSG00000080618.9	0	0	0	0	2	0	0	0	0	0	0	1	0	0	0	0	0	0	0	0	0	0	0	0	0	0	0	0	0	0	0	0	0	0	0	0	0	0	0	0	0	3	0	0	0	0	0	0	0
ENSG00000080644.11	0	0	0	7	0	0	3	0	0	6	5	0	0	1	11	10	5	2	0	0	0	0	0	1	0	0	0	0	0	0	53	0	0	3	2	0	0	0	0	0	2	0	0	0	0	0	0	0	0
ENSG00000080709.10	163	226	194	156	178	6	5	33	0	0	95	3	225	425	11	0	1	0	0	293	45	2	0	405	1	0	130	262	0	0	66	1	0	1	34	0	15	223	0	9	228	296	30	71	12	0	0	0	0
ENSG00000080802.14	997	1408	1800	938	666	1073	1099	1540	1328	956	919	1206	2068	1871	1027	1033	861	883	449	852	1349	1083	1187	1208	1999	569	1186	766	1267	847	1453	388	1139	1635	1000	1142	1084	1186	1209	1120	1284	1386	975	1008	884	857	1168	1291	2731
ENSG00000080815.14	3664	3966	5588	3817	5063	2189	6038	4020	4473	4084	7297	11849	9583	7004	6394	8119	4554	7992	1950	3733	7393	5587	2929	3771	6095	8925	2956	4475	6177	3292	9638	3226	2448	4495	5214	9930	3630	3756	7664	6773	6446	8331	6952	8421	5715	3604	4100	4236	7378
ENSG00000080819.2	3037	942	2171	1306	1685	1658	1645	1694	2239	3518	1510	2829	4202	1772	1361	5767	4043	5980	1514	1561	2698	2642	2402	1084	1165.09	3018	745	2210	2388	2974	2104	1701	1514	1411	3028	1917	2594	2084	2490	2549	1826	3163	3007	2617	3190	3043	799	2720	1657
ENSG00000080822.12	4639	2659	4371	2207	4260	1338	3071	4628	3523	3201	3722	9404	8045	5652	2389	5512	8005	7077	773	3279	4643	2305	1802	3020	2779.91	6288	1845	3222	3529	3076	5260	3035	1331	1677	4089	7413	5898	5266	3375	3166	7599	6647	4778	6449	4569	3609	2536	3156.02	3843
ENSG00000080823.17	187	158	631	3072	93	488	267	150	2939	674	175	110	189	79	554	776	80	973	441	151	180	320	781	255	739	111	137	970	723	550	261	49	517	537	306	143	267	267	177	586	62	96	350	102	436	650	419	519	762
ENSG00000080824.14	71766.01	21182.69	23425.82	19272.61	29926	15336.49	29138.95	21111.84	35688.87	60094.95	34791.73	20996	34948	52791.98	17125.49	48821.89	75280.72	167571.56	18443	35160.03	46684.94	26227.2	21339	28598.46	17118.93	14771.97	10848.95	45814.85	27433.98	16230.96	51033.31	24871.57	13952.04	11635	33289.94	13278.99	112684.82	66146.91	33786.51	50031.96	27468.99	37318.99	52333.38	89589.1	89612.73	12104.01	7374.99	17493	25212.9
ENSG00000080839.7	2963	1467	1525	854	1908	200	2485	950	2471	975	930	665	1096	1537	336	1337	2085	3633	728	344	2464	908	255	532	1539	442	678	1277	824	533	1052	1198	1522	1292	1682	454	2382	2781	1477	3019	651	2556	2056	2835	4544	667	595	611	2550
ENSG00000080845.13	2654.09	1743	1133	662	818	2434	910	3288	2164	1382	5564	792	900	1926	8150	731	3755	959	220	4325	1236	1754	2804	7894.82	1820	305	1565	1748	983	1545	6773	404	1204	1361	2785	667	2807	1918	830	1579	896	902	920	1963	812	1305	1048	2030	2263
ENSG00000080854.10	0	5	3	0	0	67	232	0	238	79	408	32	1	25	269	25	206	19	19	33	6	42	103	0	400	21	6	1	3	125	421	8	21	241	0	31	47	0	15	33	0	2	35	11	29	0	0	169	457
ENSG00000080910.7	0	0	0	0	0	0	0	0	0	0	0	0	0	0	0	0	0	0	0	0	0	0	0	0	0	0	0	0	0	0	0	0	0	0	0	0	0	0	0	0	0	0	0	0	0	0	0	0	0
ENSG00000080947.10	101	308	417	470.13	208	153	401	353	324	99	278	57	331	555	437.56	516.2	339	324.29	218	163	367	676	152	275	457	150.7	237	84	434	166	135	150	463	995	97	225.9	113.31	81	423.46	706	296	211	768	204	534	238	322	212	615
ENSG00000080986.8	2400	1251	1239	1241	2110	77	1818	327	1825	961	269	37	560	1056	93	384	2656	4122	179	249	3257	114	166	389	789	14	403	1442	648	490	396	1395	1424	369	1633	32	3229	1484	88	3385	279	3078	1266	3304	4871	322	133	109	1492
ENSG00000081014.6	1856	2050	5043	3119	1933	849	2455	1496	3690	1882	2125	6664	4185	3096	1389	5094	1118	7850	1382	883	2890	2331	1356	848	4433	4251	1437	2046	4410	1751	2985	1469	1956	2936	2692	4421	1817	2606	3962	4336	3045	4781	4732	4240	5185	1627	2260	2151	4474
ENSG00000081019.9	1176	2178	2337	1473	1572	1139	1149	2813	2510	945	1732	2456	5118	2746	1833	2800	1919	3240	1832	952	2595	1346	1872	1169	2979	1775	1808	1139	2027	979	2240	1295	1516	2840	1664	1884	1600	1341.01	2258	2617	2814	3595	2657	2756	2396	1273	1251	1434	4131
ENSG00000081026.14	1699	2565	1268	820	2245	805	1920	1016	2504	1478	1029	2292	3641	3949	1169	2157	1590	2610	782	953	3121	2557	855	1058	1019	1062	1393	746	2749	868	814	1129	1332	2495	1043	2244	1181	1887	1792	4005	1859	3631	2239	3838	2809	1038	1449	1024	1803
ENSG00000081041.8	411	187.82	95	2829	285	515	9	408	2439	541	859	1115	70	169	265	158	638	170	22	742	174	158	743	3285	8	188	99	55	53	4073	466	96	80	22	830	292	463	201	170	41	224	24	138	54	97	2904	61	1556	73
ENSG00000081051.3	0	2	0	0	0	8	5	0	48	9	0	0	2	1	34	15	24	10	0	0	0	11	4	0	0	2	0	0	7	0	0	0	10	1	10	0	21	1	3	3	0	0	26	0	32	37	1	12	5
ENSG00000081052.10	0	6	78	2	0	7338	7166	98	125	16	771	12	17	10	884	9405	1934	1971	208	4	65	170	10735	21	10	11	0	0	8877	12098	843	0	24	10	382	37	553	0	182	353	1	0	306	26	1018	16550	10	6135	20
ENSG00000081059.15	70	16	15	76	8	41	70	22	350	80	405	9	18	11	310	7	378	57	69	123	13	465	28	97	62	4	16	199	33	1	400	12	578	960	389	4	359	168	63	819	4	29	38	24	216	3	64	30	154
ENSG00000081087.10	3627	2632	5252	101756	2790	1322	8142	2029	4801	1743	3888	11086	7031	3369	3019	15047	2351	8386	2834	2611	3267	3987	1856	2743	3016	9558	1675	2458	6513	4038	6030	3277	1481	2086	3054	5414	2055	2772.88	5343	3271	6977	5120	6397	4549	5234	3250	2465	5023	3593
ENSG00000081138.9	0	0	0	0	0	0	0	0	0	0	0	0	0	4	0	0	0	0	0	33	0	0	0	4	0	0	0	0	0	0	0	0	0	0	0	1	0	0	0	0	4	0	0	0	0	0	0	0	0
ENSG00000081148.11	6	146	118	61	88	72	160	52	131	8	15	50	349	251	49	159	9	33	95	76	262	89	57	187	100	38	165	32	114	2	60	100	41	110	11	23	5	20	164	100	360	172	64	141	156	5	146	15	154
ENSG00000081154.7	4956	4518	7452	3513	5865	1997	5401	4681	5597	4034	5312	12485	10795	5661	2681	9044	4255	9787	2126	3135	8185	5906	3952	2983	8133	11289	3053	5516	8054	2849	7805	4313	4662	7377	6258	12416	4265	4762	9415	9090	5251	9430	8962	8434	9566	2761	3753	2842	10924
ENSG00000081177.14	2743	1897	1685	1688	2505	834	1693	1092	1678	1696	3033	2903	4812	2743	2431	2927	1581	2709	495	2602	2839	1744	995	1828	1619	1664	1348	2322	2026	1062	3188	1329	1309	1658	2376	1977	1664	3306	2577	2965	2983	4892	2627	4269	2782	1422	1846	1510	2355
ENSG00000081181.3	821	824	168	378	1319	102	347	8	123	507	1816	6509	2420	1483	86	308	1650	497	26	417	2280	67	116	211	195	7247	714	223	362	141	2024	1109	106	235	198	8063	1305	1932	157	413	2930	4942	232	3830	437	112	164	336	137
ENSG00000081189.9	7298	6264	1419	1250	11680	847	4695	752	4220	40	313	5	33282	10801	729	4216	806	6072	1000	3022	7230	950	844	2863.01	1490	21	3605	421	3905	413	580	1903	444	4186	771	12	305	5694.14	728	2041	16261	25443	1397	18895	1860	415	1792	237	1594
ENSG00000081237.14	0	0	339	0	0	0	65	0	11	0	0	1	0	0	0	7	0	19	0	0	1	7	0	0	0	0	3	24	0	0	35	4	0	15	0	1	0	0	5	0	0	0	0	0	5	0	6	0	3
ENSG00000081248.6	0	0	0	0	0	0	0	48	938	0	0	0	0	0	0	0	0	0	0	0	0	0	0	0	0	0	0	0	0	0	0	0	0	0	1	0	0	0	0	0	0	0	0	0	0	0	0	1	0
ENSG00000081277.7	32	3	0	94	22	23	12	12	96	49033	1496	46725	7	216	153	12	564	49	8	22	2	7	21	58	69	18250	9	0	48	42	1838	0	8	25	3	54793	208	0	6	9	1	20	86	30	84	6	16	1	97
ENSG00000081307.8	1571	1393	2963	1395	1680	856	4111	1690	3531	1856	1429	2749	2616	2242	1483	3654	1634	4646	2340	1027	3168	2150	1333	1092	2783	1863	1101	1606	4094	1220	1994	1717	1740	11078	1985	1696	1622	1511	1980	3448	1286	2515	3740	2359	3987	1092	4201	1460	3245
ENSG00000081320.6	1712	1471	6757	1874	4468	6628	26226	2551	5106	2848	973	11352	2082	2176	2558	12965	3153	6183	4391	469	2368	6701	10416	997	17479	7987	1263	4420	17399	2885	1693	2991	2910	9818	12647	9635	2976	2697	3597	10276	1826	3237	8145	2784	8973	2899	5948	3445	42473
ENSG00000081377.12	334	454	2066	1139	126	992	2236	2203	2021	989.99	1707	1289	2533	1191	2597.99	3251	1529	1425.99	2060	724	232	6250.99	1161	488	2853	935	377	1377	2110.98	713	2733	74	4238.99	9949.99	1921	838	1762	137	5931	6566	1374	1651	1844	988	1316	355	4863.96	1282	2487.96
ENSG00000081386.8	757	1063	1664	869	1538	685	1459	936	1268	391	762	992	3656	1906	1031	2375	591	1599	537	438	1806	1784	946	615	2084	850	797	955	1723	760	1189	939	1251	2139	899	969	1020	861	2204	2294	1737	2334	1823	2206	1664	646	1168	1154.25	2845
ENSG00000081479.8	0	0	6	9	0	0	2	0	0	0	100	1	3	0	2989	4	93	0	44	1	1	0	0	4	0	0	0	0	0	0	135	0	0	2	0	1	0	0	3	0	0	0	0	5	0	0	0	8	0
ENSG00000081665.9	980	812	768	797	837	578	974	1520	674	473	1382	1218	2046	1548	1585	1615	1297	1115	771	873	79	1009	1082	883	1484	724	478	804	1206	864	1554	232	860	2012	763	1155	1069	311	1473	1852	1786	1226	1321	1450	776	773	896	778	2384
ENSG00000081692.8	2034	1835	1904	1804	1814	970	3056	1851	3927	2688	1981	2063	2725	2596	2290	2933	1196	3303	595	1391	3929	3688	996	1033	1786	2205	1837	1488	4294	1271	2163	1438	1976	2149	2675	1876	2264	2066	2750	2764	2431	2869	4590	2845	3617	2182	2220	2525	2041
ENSG00000081721.7	952	800	728	502	1093	356	926	866	1046	598	1282	1539	1659	994	857	779	950	1132	449	614	1867	790	369	472	639	1857	421	999	1430	639	1640	531	740	906	916	1427	1138	1032	1072	1375	884	1954	1033	1528	1484	270	494	622	707
ENSG00000081760.12	3085	1604	4531	1810	3796	1446	1533	929	2338	3955	3280	4732	3858	2843	4546	2982	2640	4592	1322	1863	3762	2805	1681	1696	1962	3486	1359	5219	5039	2711	4072	2251	2996	4716	4147	5048	3906	2634	2184	4148	2517	6134	8596	6940	5668	2373	2947	3400	2028
ENSG00000081791.4	4369	4099	2143	2412	3100	2121	2182	3185	3402	2074	4342	1180	7696	3892	6936	2871	3417	2033	1487	3667	3642	3201	2357	2930	3269	842	3626	2968	3054	3104	4445	1166	2961	4216	3179	1204	3147	4290	2400	3560	5147	6355	2930	6417	2734	2765	3040	4374	3614
ENSG00000081800.4	0	0	0	0	0	0	0	0	0	0	1	0	0	0	0	0	0	0	0	0	0	0	0	0	0	0	0	0	1	0	0	0	0	0	0	0	0	0	0	0	0	0	0	0	0	0	0	0	0
ENSG00000081803.11	5111	4840	3263	1048	7756	1382	2694	633	1977	34	876	695	17916	8738	1380	4297	681	2679	2022	1476	10866	4066	2143	1106	3129	586	3201	3028	4037	1361	1355	3709	1427	1649	1599	288	791	5800	5991	3896	7727	12506	5455	11723	3507	1159	1471	2421	3829
ENSG00000081818.1	12	18	11	20	8	23	59	0	16	0	51	4	20	31	11	93	1	11	21	2	26	18	69	43	214	0	15	1	12	26	56.96	1	21	65	4	8	0	13	59	8	34	12	15	30	3	10	41	51	209
ENSG00000081842.13	0	18.08	25.6	28.21	25.56	34.74	27.48	1	18.7	0	36	9.23	23.35	14.51	96.01	550.92	0	70.88	54.72	52.52	152.59	75.19	43.83	26.98	60.02	0	32.01	1	97.2	0	6.65	8.17	46.98	59.64	0	28.66	0	0	120.62	58	60.89	2.31	214.42	12.79	110.64	0	181.65	55.6	40.68
ENSG00000081853.13	92	136.09	298.53	76	134	424.56	205.05	397.5	314.56	80.48	340.36	22.72	170	248.72	819.73	401.84	29.19	244.57	144.2	206	178.71	817.55	350.08	299.66	397.03	12	237.63	52	306	734.47	331	32.57	143	546.8	68.18	32	57	100	426.82	422.99	157.83	118.89	284.01	190.87	123	303.9	473.12	381.41	513.97
ENSG00000081870.7	517	304	574	503	435	264	604	210	1089	563	168	309	599	437	366	490	967	741	211	194	614	265	467	245	559	224	223	489	681	450	234	313	514	535	726	328	763	453	509	971	443	706	544	597	622	434	198	487	700
ENSG00000081913.9	2907	1380	807	9181	1545	368	849	1003	1090	1377	742	1295	1882	1690	2243	1080	1786	1425	1027	1291	1094	1055	652	1347	1448	696	1421	838	669	613	1101	569	992	2636	1852	1106	1037	1498	1028	1119	640	1611	1676	2884	1919	499	1313	2514	1813
ENSG00000081923.6	12717	13344	4306	210	18572	723	21729	317	4502	3231	2695	6099	10045	11134	4797	26457	3097	23715	1201	8667	20734	13545	1139	7760	6355	4228	9446	1825	13967	2389	2892	8241	4682	14039	2754	6370	5436	9480	11822	14371	2451	13971	9401	17054	10962	3568	6596	1053	8915
ENSG00000081985.6	0	0	0	783	0	0	0	0	0	25	44	75	0	4	1	0	28	0	0	0	0	0	0	0	5	31	0	0	0	0	22	0	0	0	0	36	57	0	0	0	0	2	0	1	1	0	0	0	6
ENSG00000082014.12	33	117	1491	572	53	1513	2141	2301	2023	208	651	81	194	101	3410	2096	352	2252	1010	162	363	2422	1734	205	1921	116	178	955	4423	1143	893	131	753	1908	1593	260	447	130	1685	1664	60	196	2132	58	1567	1912	1880	4132	2307
ENSG00000082068.4	1707	2039	2016	1322	2824	931	2273	761	2248	1260	1519	2509	4579	3528	1275	2769	1739	2880	2306	1396	4510.33	2396	1335	1116	2322	1889	1425	2233	3233	1220	2070	2078	2191	2524	1388	2028	1424	2028	3194	4262	2476	4201	3503	3513	3495	942	1562	1203	2807
ENSG00000082074.11	0	1	0	439	5	46	18	0	16	116	0	16	0	0	18	0	0	50	6	0	0	3	17	0	54	46	0	0	2	2	0	0	6	23	3	4	0	0	4	0	0	0	4	2	10	0	9	1	51
ENSG00000082126.13	661	923	232	35	512	30	150	0	1398	2	11	4	1	344	15	463	0	1000	13	1721	1109	57	61	1059	95	1	330	252	161	59	1	150	171	15	260	8	52	744	11	54	12	257	169	288	342	28	35	77	150
ENSG00000082146.8	1972.89	1043.33	3107.57	3114.1	992.52	839	1903.25	2159.3	3249.2	790	1464.78	1369.98	1526.82	1063.86	2867.52	4081.28	1722.61	4069.07	575.81	1370.37	1245	3099.37	1176.92	721.91	2228.04	705	905.74	4145.68	2539.6	2136.28	2558.1	1042.92	1908.4	1360.55	2386.84	985.85	1904.8	1676.88	3539.1	3492.92	774.74	2239.63	3718.87	1550.76	3933.05	2194.98	1716.13	2213.68	2748.46
ENSG00000082153.13	33327.83	38752	28764.22	8109.07	27219.71	12965.66	129904.21	22397.69	67734.38	27568.4	22658.82	49138.71	55323.93	25289.77	11739.03	43391.03	44835.31	89889.56	21001.48	19749.61	60297.72	23298.98	18747.18	11227.5	58812.59	44352.95	20215.13	42523.64	42457.57	25478.35	31550.19	28738.45	29734.38	19828.89	39998.18	49076.76	37715.36	52442.44	25169.24	57386.47	27663.02	69185.08	30501.51	52160.77	50456.18	29430.38	11936.1	20821.36	76181.92
ENSG00000082175.10	0	15	2533	0	9	54	411	1203	33	0	3	0	4	1	70	56	0	96	42	2	0	93	69	0	87	0	0	340	69	91	3	7	7	631	658	1	11	6	485	277	0	5	1320	10	1538	41	1127	129	287
ENSG00000082196.16	24	55	42.23	23	29	8	37.76	26	0	46.81	47.13	9	114.6	70	226.64	41.71	136	17	171	145.21	36.59	31.84	36	409.08	106	15	21	11	43.89	18	77.75	4	52	136.94	5	11	17	111	48	81.46	37.66	55.09	78	24.74	65	60	17.03	16	173
ENSG00000082212.7	4927	3449	2866	5349	3518	1143	2707	1338	4445	3459	3969	9396	4366	5021	3315	4674	5647	7534	1262	3289	7377	3070	1375	2059	2265	7226	2332	4128	3675	1833	6839	2880	3109	1911	3034	6239	5135	5866	4596	4629	4062	6384	6646	6624	6849	1754	1413	1803	2983
ENSG00000082213.13	1787	1806	2990	3137	1505	489	1060	1741	1689	1346	1977	2633	2693	2005	1507	1663	1813	2454	255	1306	1913	1335	865	1241	2562	1337	1442	1659	1667	948	2740	1047	1244	1464	2100	1412	1819	1547	1905	1404	1802	2332	1443	2321	1667	1059	1286	1338	2606
ENSG00000082258.8	2324	3934	3863	2520	4344	995	3361	2257	2875	1279	2964	5272	9059	7521	2112	4330	2421	4155	1216	2044	6309	2730	1629	2198	3147	4007	2608	1248	4957	1967	3658	2657	2115	2979	2276	4063	1935	2261	3956	4044	5723	7261	4840	6135	4910	1615	2533	1869	4312
ENSG00000082269.12	1281	1660	3342	970	2392	573	985	1001	1574	3150	1874	10963	5024	2605	1232	1609	3554	1183	1001	905	2660	1144	678	1118	2017	6304	1051	460	1605	806	2687	1500	967	2115	1016	9985	2192	1033	1949	1585	1716	3192	2215	2465	1500	817	1285	987	2772
ENSG00000082293.8	0	0	134	5	0	0	0	42	21	0	0	0	0	0	2	193	4	8	3	0	0	15	1	0	3	0	0	0	0	0	0	0	14	16	0	1	0	0	3	2	0	3	9	0	23	0	0	0	0
ENSG00000082397.11	7691	5119	19	12914	1530	2159	152	3730	14087	331	3261	62	101	2385	2119	2858	6552	4258	876	3290	17529	5228	2077	4058	3759	47	2148	0	43	3399	5029	8471	10651	3160	2546	354	5266	914	3700	9429	1588	846	1005	5272	1917	3326	1103	2199	4506
ENSG00000082438.11	2224	1625	1666	2265	954	71	539	78	723	1899	6671	3073	418	1404	16052	2969	5365	1656	1380	1429	1319	816	31	1116	3491	1567	462	308	480	247	8938	1814	383	931	673	3027	3984	1782	1052	937	965	833	2141	1020	1105	126	1796	866	4427
ENSG00000082458.7	109	73	1215	242	73	318	6210	1772	248	1586	2780	1913	273	194	2241	1618	3265	1680	1176	237	446	2209	624	88	693	2247	59	1138	3133	415	4336	167	249	1013	1878	4064	2780	65	3097	2688	156	307	3001	122	2688	280	791	619	1103
ENSG00000082482.9	0	6	4705	804	1	17	687	96	832	1	0	0	16	0	36	499	0	495	1757	3	4	346	52	1	891	15	7	1023	2	3	0	5	787	4061	621	0	1	0	354	591	0	7	1842	3	1691	14	10734	30	4400
ENSG00000082497.7	394	353	4226	39	473	141	285	37	54	802	878	40	10	331	2758	951	1572	1492	1	225	263	18	382	271	1	65	216	6	425	0	1872	199	6	638	146	31	1991	87	9	32	11	67	166	257	43	21	2126	370	9
ENSG00000082512.10	866	1278	2887	1144	1221	328	1024	863	452	118	2304	173	2255	3089	1480	2171	820	940	1133	1149	1551	989	514	1860	1274	222	937	422	2206	575	2964	893	409	1223	1070	200	1041	373	1485	1416	1088	1631	2161	1700	1683	1146	1402	1334	1518
ENSG00000082515.12	1244	811	574	416	933	403	624	713	619	786	497	679	1887	916	552	937	1008	1424	154	862	2431	422	540	562	714	530	562	926	884	347	522	1227	449	548	1127	859	1527	1568	805	977	1383	2220	737	844	963	446	295	257	759
ENSG00000082516.8	4437.58	3366	3631	1590	2520	1557	2299	1336	5776	2650	2409	4652	5383	4906	2754	3131	2640	7471	1519	1976	5976	3356	1989	1631	2495	2325	2361	2508	3181	1645	3439	2347	2782	3155	3326	1703	4426	7456	2945	3650	3612	4863	3864	6438	4698	2048	1910	2265	3547
ENSG00000082556.6	0	0	0	0	0	0	0	0	0	0	2	0	0	0	0	0	0	0	0	0	0	0	0	0	0	2	0	0	0	0	0	0	0	0	0	0	0	0	0	0	0	0	0	0	0	0	0	1	0
ENSG00000082641.11	17607	15301	12382	8433	14854	6381	15633	8815	17332	10233	25358	26204	19125	27376	21815	20664	11584	23867	10278	19533	18217	17011	8969	19232	16064	12112	11206	15965	14929	10131	36384	5854	6037	9023	21653	23933	11765	15859	14046	14194	15123	18925	29798	27756	18109	9046	12157	11453	22168
ENSG00000082684.10	0	0	0	0	3	0	68	0	0	29	7	66	61	8	2	46	0	3	35	1	6	0	0	1	15	7	2	0	0	0	0	0	0	0	0	44	0	0	0	0	10	12	0	5	0	0	0	38	58
ENSG00000082701.10	7219	9602	11962	6545	3872	2954	3724	4450	8427	6901	10007	8998	7875	8240	6705	3741	6876	5118	6578	7380	6780	4060	4216	6905	9681	5895	7152	4665	4552	3808	13393	2180	4828	9159	6283	6317	4730	7240	4651	5956	4620	7185	6145	8610	5097	3284	7467	6609	12718
ENSG00000082781.7	18090.14	4665	14645	2603	12483	11187	37073	6278	18750	7323	4037	6061	4579	9353	17840	61438	7099	32988	6584	19524.92	13206	22113	13511	9332	12421	10683	3962	22729	51390	10933	5670	4387	10461	17722	29517	8994	11622	22682.03	10663	16667	4184	9693	57561	8122	36153	12911	28797	14594	25917
ENSG00000082805.15	6173	6192	6196	6281	5097	3511	4000	3693	9457	3480	5400	5696	7715	10559	8829	5695	4499	7091	3725	6067	6512	5780	4555	6015	8498	3181	4391	3269	3957	3260	5525	2698	4387	5538	5973	6377	2548	4144	5616	8085	5473	7346	9481	11728	9404	2383	4343	3966	9702
ENSG00000082898.12	18501	13397	19755	10319	17543	4230	17599	11164	20746	14843	10272	23697	24871	24414	6974	34345	16034	39171	10877	9094	24351	14632	6137	8463	13726	13814	6638	14978	20143	6773	13392	13811	11982	14610	17782	12964	17604	24255.05	21119	36988	15457	30863	36834	35972	45663	8226	8669	8792	24958
ENSG00000082929.4	0	0	0	0	0	0	0	0	0	0	0	0	18	2	0	0	0	0	0	0	0	0	0	0	0	0	0	0	0	0	0	0	0	0	0	0	0	0	0	0	7	8	0	14	0	0	0	0	0
ENSG00000082996.15	2032	1790	2419	6772	2749	1724	2850	1804	3834	1456	2179	7847	5311	3020	2136	4439	1501	2563	1011	960	2695	2121	2567	1188	5405	6357	1428	2310	2424	2274	3004	1434	2777	2938	2076	5463	1730	2239	3777	2905	3960	4028	3117	3753	3246	1892	2171	3155	6723
ENSG00000083067.18	7	21	4	52	1	80	568	107	1015	0	5	0	105	793	149	585	0	124	1824	0	231	11	149	0	14	0	13	98	204	489	0	42	691	2159	50	0	1	11	127	26	56	41	178	79	96	47	2574	334	55
ENSG00000083093.5	1231	1479	1922	1665	763	524	731	931	1860	1126	1624	1791	1291	1010	962	1094	1116	1730	662	983	1216	987	981	740	1292	1015	793	642	897	732	2212	501	1362	1004	1430	1019	1430	1046	1113	1026	890	1232	1026	1174	1575	569	891	881	1946
ENSG00000083097.10	2171	3243	4049	3580	2421	1094	4473	1311	2903	1899	1519	7238	5179	3456	1966	5717	1071	4951	1715	1187	4717	3610	1843	1398	4423	4240	2356	1790	9387	1499	2030	2785	2250	5267	1354	5209	926	2374	4008	4588	2661	3520	4694	3522	4528	1643	3243	1625	6343
ENSG00000083099.6	1962	1421	2504	2013	1636	878	2498	1439	2278	1353	2594	1786	3228	1783	1201	2350	1647	4082	949	1283	2411	1745	1295	895	2379	1294	902	2324	1970	1575	3061	1513	1591	2019	1858	1644	2495	2693	2801	3269	1950	2859	3306	2836	3664	1135	1512	1567	3508
ENSG00000083123.10	773	732	1147	956	653	749	813	602	1363	789	1130	884	1714	1219	1514	1137	1441	1558	542	736	1141	1269	781	462	1885	837	416	773	1338	601	1551	580	813	2085	1167	804	1124	1042	732	1805	1007	1669	1278	1666	1013	465	1366	949.06	1764
ENSG00000083168.5	6292.98	6934	5976	4754	7155	3064	5610	5063	5465	3604	6655	7895	17836	13091	4828	4702	4355	7251	3429	5036	9114	5530	4101	5562	4953	5323	5349	3875	5746	2577	8989	3836	4147	6679	5332	6743	4315	5323	7486	8242	11474	12411	8139	13900	9423	3565	5237	3604	7280
ENSG00000083223.13	2022	3890	6063	2338	3270	2893	6000	2250	10679	3086	2813	5827	8944	4961	1880	6927	2408	7005	4148	2754	5495	5886	4460	2236	5548	3477	1925	3197	6030	2443	3959	2076	9601	5332	3198	5837	1639	2226	4972	6651	3919	4973	6541	5594	7712	2276	3984	2991	8472
ENSG00000083290.15	1861	1654	2349	3760	2060	1037	2200	1633	1609	741	2666	3747	4318	2282	4589	3092	2716	2069	1691	1516	2281	4495	1555	1635	3467	2214	1563	2185	3318	988	3601	1115	1468	3285	1810	2405	2273	1078	5672	3695	4579	3542	3927	2678	2841	2126	2949	3643	4130
ENSG00000083307.6	1	0	2	0	0	0	2	18	5	4547	1223	6420	1	1	17	0	494	0	0	0	0	0	0	0	0	3679	0	1	0	0	1435	0	0	11	195	6874	675	0	0	0	0	0	0	36	0	0	3	0	0
ENSG00000083312.13	38465	71352	51122	30658	49446	12259	34681	16554	49981	9718	17765	51294	77771	70163	11326	80210	14512	62269	20119	28027.77	114214	34913	20292	23047	28482	34816	46040	45573	52687	24421	26577	55439	21874	27146	24567	26351	20481	48054.98	32640	34458	47780	82597	78043	92445	66264	23572	20425	23476	50260
ENSG00000083444.12	18795	19340	18194	9632	18417	19976	27050	27623	24587	8179	5581	4684	12368	32953	16966	63173	7914	54318	2386	30584	24557	30736	22978	30429.89	11088	4511	19868	25503	54604	56383	7155	10424	12218	8353	42784	5528	7842	23629	11338	21450	12831	19946	42642	28747	19578	61757	10740	33862.53	14895
ENSG00000083454.17	214.3	18	71.97	5.28	18.95	42.66	56	33	238	5	347	59.45	8	8	604.84	216.61	227.33	195.42	41	37	13.88	208.64	8.48	107.92	40.5	34.99	11.84	638.26	37	18	352.15	41	21.79	4	283.6	18.07	150.75	41	34.14	61	8	56.99	112.38	11.66	249.69	5	0	17	105.64
ENSG00000083457.7	532	289	554	154	413	126	362	290	226	423	329	457	505	307	233	250	650	415	204	143	803	175	77	146	380	307	152	464	634	352	486	231	136	266	504	431	926	375	333	371	289	738	277	162	329	443	138	769	488
ENSG00000083520.10	4965	6521	5954	4931	6292	2431	7084	4560	10512	4567	5856	6300	11031	9759	3361	9328	4326	10780	5264	3481	10966	6118	3993	3397	5884	5536	4218	4813	10285	2928	7444	4270	5241	5562	6837	4692	4584	4539	6676	9269	7686	10277	9321	11584	10684	3353	4306	4205	7766
ENSG00000083535.11	822	1123	2110	845	1277	722	2106	1186	2308	761	1123	1545	3534	2089	485	2230	776	2096	1119	564	2970	1460	1033	1043	1888	1239	786	1533	2542	548	1786	1359	1392	1690	1404	1530	950	443	2501	2895	1393	1798	2651	1528	2800	465	1158	1241	2886
ENSG00000083544.9	459	926	975	3690	905	535	1761	981	1236	722	836	1529	2241	905	851	2345	701	1540	1027	406	1596	971	791	409	2074	932	801	835	1481	372	1112	602	677	2006	709	979	688	474	1941	1641	1211	1338	1613	1191	1521	521	1148	535	2697
ENSG00000083622.8	0	0	0	0	0	0	0	0	0	0	0	0	0	0	0	0	0	0	0	0	0	0	0	0	0	0	0	0	0	0	0	0	0	0	0	0	0	0	0	0	0	0	0	0	0	0	0	0	0
ENSG00000083635.7	415	274	511	288	183	231	251	529	511	716	675	548	408	378	458	334	705	532	347	338	380	270	345	270	355.99	385	265	311	327	219	832	251	455	317	491	332	623	419	477	363	259	349	351	415	484	215	243	384	480
ENSG00000083642.14	2643	4371	5353	2196	4426	1918	4027	4011	3095	1417	1727	2170	8450	6279	1975	4548	1823	5442	1673	2377	7276	3090	3060	2650	5798	1463	2724	2506	5012	1617	2968	3405	2527	5458	3426	1359	2111	3438	4688	6701	4040	6480	5954	7794	6765	1388	2484	1897	6952
ENSG00000083720.8	2859.25	2663	2323	2221	3592	777	7123	729	3350	1974	1746	2951	2474	4337	2100	3612	2057	7667	1059	804	4941	3263	1384	869	4980	1647	1412	5075	5037	1179	2614	2579	2944	3181	2758	1914	3462	3747	2643	7104	1786	5980	5735	6875	8619	1299	1726	2454	5609
ENSG00000083750.8	548	695	991	678	851	611	1600	680	416	99	812	760	1246	1128	962	1874	289	795	806	887	1005	2291	823	517	1021	546	541	731	1457	452	1042	560	459	1166	315	628	227	374	2479	1356	1061	901	1569	1145	725	439	678	1175	1332
ENSG00000083782.3	0	1	0	0	0	2	0	0	0	0	0	0	0	0	3	0	0	0	0	0	1	0	0	0	12	0	0	11	0	0	0	1	0	7	0	0	0	0	0	8	0	0	0	0	0	0	2	0	11
ENSG00000083799.13	3155	3074	7934	3486	3934	1301	9543	1170	5237	1445	3426	7789	7421	8357	2066	12770	1912	9867	3697	2364	5578	6725	2124	2813	8308	4106	2177	2664	6375	2066	4141	2656	2888	7587	2773	6058	1933	3903	7872	9400	5720	6340	13675	6139	11479	1619	6477	1563	9519
ENSG00000083807.5	90	217	123	364	309	127	420	281	272	452	189	461	354	279	293	205	321	244	182	89	625	179	63	140	185	458	184	73	866	134	218	96	174	104	258	748	213	176	272	330	377	556	259	189	145	130	148	178	209
ENSG00000083812.7	735.22	1123.46	1260.81	1168.59	950.05	683.67	1243.42	746.13	1827.36	1097.5	1028.09	1136.98	1766.96	1098.54	1440.76	1081.22	568.91	1852.79	527.43	1017.3	1558.71	1621.05	752.1	854.02	784.24	817.7	980.55	525.64	1589.31	1054.51	781.89	589.62	1177.61	1369.17	1197.34	857	855.93	753.64	1220.14	1381.2	1320.03	1569.4	1539.36	1490.96	1661.19	722.28	1195.91	1087.14	1078.55
ENSG00000083814.8	232	400	463	734	646	301	1033	686	607	148	295	259	760	578	475	1011	113	1352	394	270	553	1080	531	230	401	471	204	352	1311	490	233	297	207	762	528	582	243.96	168	988	1389	770	837	646	956	696	550	517	621	990
ENSG00000083817.8	272	446	531	345	479	144	526	268	584	412	442	821	773	403	448	666	187	789	149	330	532	585	190	233	446	471	323	200	817	529	516	201	346	632	573	669	330	219	697	687	606	502	587	462	594	294	634	515	663
ENSG00000083828.11	255	749.02	1200.02	384	781.01	262	712.34	706	753.2	604	320.1	998.01	1918.06	1274.53	456	1934	351	1376	242.04	350	947.64	910.04	343	354.02	825	855.1	524.01	429	1302.45	376	830	781.02	516	799.1	458	635.08	391	802	1071.03	1322.03	1269.07	1326.07	1139.38	984.18	959.01	560	574.08	289	1229
ENSG00000083838.11	542	484	429	456	375	738	370	724	592	489	838	249	523	275	1430	468	661	477	278	610	524	958	765	530	585	184	443	781	607	422	898	135	798	1168	661	277	645	576	661	887	287	513	840	679	644	627	602	1059	658
ENSG00000083842.8	7.06	3.88	2.07	0	39.23	79.9	0	292.5	0	42.4	61.86	0	0	0	0	200.99	86.36	12.56	44.81	0.06	0	0.04	26.03	10.46	1.16	0	0.03	13.6	0	28.47	42.16	0.92	4.76	2.12	39.75	0	38.96	15.28	0	1.66	313.36	0	0	10.3	4.19	276.67	4.3	57	75.99
ENSG00000083844.6	1210	2103	2854	984	2434	1268	2586	1593	2253	1122	3120	5591	5314	4215	2630	4424	1259	3291	1225	1105	3392	3367	1787	1219	1701	4587	1469	933	4119	1306	3089	1424	1187	2644	1290	4331	918	1024	3476	3302	3628	3891	4217	4294	3165	1256	2230	1120	2920
ENSG00000083845.4	48506.99	19471	18902	9864	67964	19522	45112	44847	54932	41741	36820	70770	89648	38832	43902	45060	30337	51307	1639	26984.01	84702	30188	27637	14038	16373	88473.44	18526	47763	98071.27	34563	42981	16840	42830	22641	58876	70918	42995	39964	61434	37533	57199	104638	41439	30073	39572	43227	13038	55737.79	17172
ENSG00000083857.9	642	967	141839	30033	4843	16616	63825	45523	44052	61279	86641	198351	942	1365	190564	100403	50188	101682	21861	23181	2123	110875	21517	24254	96170	91006	416	25048	56906	22947	108918	1361	47306	59389	64697	66198	34326	1293	150584	76422	311	664	71113	1036	39273	13880	60390	30658	143652
ENSG00000083896.8	2859	2392	3118	1575	2817	1659	3886	3253	3133	3418	3114	6598	5802	4482	2395	3820	4311	5246	4163	2146	5151	2700	2319	2132.2	2822	4036	1729	2828	4215	1649	4948	1901	1743	3242	2579	5407	3913	3273	3762	3816	3086	4535	4812	4602	5063	2552	1955	2190	3700
ENSG00000083937.4	2084	1915	3581	1925	1224	1074	1513	1821	2644	2852	3848	3469	2480	1374	1366	2763	2375	2540	1758	1841	2066	1664	1700	1403	3662	2052	1381	2996	2333	1303	5007	1197	1546	3159	3543	2648	2602	1984	2030	3084	1437	2468	3201	2254	4140	1613	1633	1926	4035
ENSG00000084070.7	1065	763	1514	1345	351	931	1562	1695	3756	1701	840	865	594	645	845	1190	524	3411	263	733	679	2446	1105	837	1082	426	449	2211	1251	1969	1507	398	1684	1759	2709	1032	1117	2668	809	3963	360	730	1349	812	2393	1777	1383	1599	1595
ENSG00000084072.12	1830	985	1140	1009	1429	726	1425	1487	1249	1607	1976	2074	3235	1886	1897	1453	2415	2443	622	973	2356	1218	941	942	1248	2564	860	2438	2477	1083	2771	1584	983	1228	2314	2119	1774	1316	1486	2095	1964	3136	1644	1743	2102	1315	731	1597	1346
ENSG00000084073.4	5087	5771	10219	4647	6838	2559	11061	2797	9312	3696	3838	9221	11515	7271	2558	8235	3194	18446	2128	3732	9911	7065	3902	2898	11754	5814	3185	5269	8324	4960	5939	5074	4353	4668	5380	3939	5248	7649	8293	9969	8857	11568	9660	10268	11171	4137	4528	4816	11261
ENSG00000084090.9	15364	18950	19118	21482	14522	4179	11840	7405	24672	9333	9547	12730	50100	25866	8161	17621	11873	36842	4530	7583	25806	11739	6135	5979	11960	9715	13143	13321	15200	8878	12065	12072	11993	18196	13544	7036	16490	16574	7497	14013	34280	53258	14705	37263	20691	7157	17702	8828	15646
ENSG00000084092.6	2243.94	2316	1491	1473	2645	2743	1442	5221	2915	3218	2745	2264	4567	1936	5571	2045	3126	2045	1252	2303	2908	3408	3175	1682	2206	2229	2231	2374	2525	1783	3232	1056	2474	3071	2694	1459	3371	2242	2475	3124	1516	3555	2631	4214	2073	1572	1850	2839	2520
ENSG00000084093.11	6612	12145	11150	5496	5284	3290	6558	6121	8858	4308	8166	6854	15626	8724	6961	6552	6119	12932	3584	6943	10865	5742	5113	5737	9829	4178	7441	4857	8550	4289	11703	5299	5284	10085	8241	5491	5802	6538	6522	9221	6876	12299	8371	14095	8739	4866	7299	4680	14944
ENSG00000084110.6	27	26	2	12	8	0	14	33	0	1	2	19	17	8	7	2	4	6	18	2	16	7	3	6	4	45	0	1	4	6	16	18	0	6	0	27	1	11	2	6	3	14	4	12	2	0	3	0	8
ENSG00000084112.10	9104	4991	7175	8560	3741	3891	5884	6420	4888	6032	6996	4507	11470	13312	11061	10365	6636	12444	1439	9482	3652	7900	5061	11383	8987	2646	4568	2837	15007	5713	8075	1618	2976	3353	10063	2044	4937	5266	5722	8049	7398	8659	6486	12032	5038	5050	6425	9682	11284
ENSG00000084207.11	14440	6995	7968	23310	22498	4707	21853	9627	16507	54653	28419	41271	15594	14851	81489	24832	63140	17245	1605	15984	32902	15408	8042	12829	7199	35688	9215	15933	47186	18287	25572	5824	13461	12749	47527	77797	46845.94	21386	9851	17455	16345	39579	17705	18721	12128	16548	4453	20599	7839
ENSG00000084234.12	119739.02	66033	24501	8342	78622	34294	165380	19639	31953	51200	47711	74452	232721	142713	44282	63721	65283	73233	66614	129556.85	121038	74750	48298	76658	43333	59772	55527	42361	85553	39142	68468	22598	31343	74341	42553	66733	35211	63927	50305	86975	156146	177541	80512	142531	64755	43400	44246	43627.96	56158
ENSG00000084444.9	801	758	1408	1377	1033	523	360	1070	1846	340	620	525	2852	2794	492	2525	688	1820	148	462	1121	1434	934	714	705	367	761	848	980	978	820	977	1266	757	986	563	896	1415	1119	1410	2920	2563	1006	2066	953	968	669	1577	741
ENSG00000084453.12	0	0	24	8	0	0	0	0	0	0	0	0	1	7	2	15	0	22	0	0	0	0	0	0	0	0	19	0	2	0	2	0	0	0	0	1	0	0	0	0	0	6	0	0	0	0	0	0	1
ENSG00000084463.3	4428	2468	1575	6858	954	1715	695	2541	2793	2369	3304	827	1498	1652	2784	788	3423	1932	415	2093	1393	903	2809	1836	1585	342	1623	2439	972	2064	3683	458	1295	1192	3999	558	4407	3998	621	1543	824	1575	650	2116	1166	2263	889	3629	1864
ENSG00000084623.7	21493	9715	10809	7228	16366	5474	14413	8661	19481	15325	9658	25199	22312	12095	13197	17121	15703	30831	3745	11004.97	27007	16301	6898	5393	11083	27488	8729	20402	27439	8584	12169	8416	12347	10724	21447	21303	20948	18746	12772	23790	13253	26680	17109	17724	22127	10927	6746	11593.06	10923
ENSG00000084628.5	2	5	0	27	0	28	1	2	23	0	143	0	7	4	25	5	73	0	0	9	5	3	12	0	23	0	0	0	7	21	253	0	9	7	8	3	54	0	4	0	1	0	0	10	0	124	11	30	23
ENSG00000084636.13	19	47	8756	1103	43	9429	5737	13878	6268	10039	743	21948	28	112	11876	18568	425	2691	3982	78	51	15086	10374	148	8898	12477	33	1231	27014	8781	950	154	5409	17387	14345	11040	188	36	25890	11998	116	48	30756	43	7473	3880	17898	18316	12627
ENSG00000084652.11	12979	12721	19509	13709	13123	6875	18413	7486	15818	5123	10307	11954	20908	13420	11649	16085	6049	25552	3430	9646	20362	20300	8637	8040	17956	9405	9982	13075	17897	7853	14187	8165	11300	17586	12196	11289	11040	12283	19282	16443	14735	21108	19445	19901	20878	7449	17401	12113	22711
ENSG00000084674.9	6	54	11	0	13	200	4	0	15	0	0	9	24	305	10	4	0	0	0	32	203	5	181	53	256	3	22	0	0	30	0	112	16	6	10	1	0	1	16	0	25	30	10	60	7	21	6	65	901
ENSG00000084676.11	1481	2343	2683	2761	1382	2404	2169	2858	1987	700	2363	809	3187	2516	2758	1837	1440	1806	1299	1820	1832	2864	3151	1782	3454	456	1490	1700	1752	1747	3052	532	1714	4819	2050	1200	881	1310	2926	3548	1894	2399	2501	3329	1867	1433	3303	4086	4348
ENSG00000084693.11	1605	1840	2561	962	1355	764	1415	1493	1601	1587	2020	1073	2602	1084	3784	1389	1656	2216	1112	1036	2473	2717	848	779	1460	824	1608	2506	3192	756	2376	713	1218	2384	2242	1524	1520	1200	2176	2382	1680	2927	2207	2002	1914	809	1687	1045	1930
ENSG00000084710.9	136	90	0	4157	61	47	520	25	306	11	380	40	81	343	194	88	358	342	30	126	260	120	10	106	589	0	147	38	299	85	348	40	47	301	140	15	148	25	71	155	296	132	87	219	69	19	53	30	363
ENSG00000084731.9	2185	2459	1514	2780	1046	889	1074	1721	1633	1891	11041	315	4619	2453	6796	1571	5918.73	2439	728	4613	2953	2145	1081	2981	1185	320	2209	1997	2496	1439	12142	805	954	2061	3318	304	5016	1346	1478	2058	3150	3371	2046	4093	1524	1545	1498	1968	1580
ENSG00000084733.6	10920	9229	13079	8396	8340	6609	17434	7437	20720	24098	16238	23443	11466	10140	8621	11244	14619	18169	10884	9453	12747	16652	9451	7501	15517	17862	5641	8743	12951	8805	22247	5532	10241	10156	12209	40654	9975	10667	10551	16956	7434	11772	12269	11264	10814	7827	8179	9738	18774
ENSG00000084734.4	13	49	0	0	4	14	859	14	19	0	17	10	0	12	31	80	45	155	30	21	520	8	11	8	19	0	26	0	210	19	39	128	6	13	29	2	0	30	11	34	2	5	8	5	11	1	4	7	24
ENSG00000084754.6	16364	12864	10376	11179	18756	8928	15835	9494	15446	12884	9222	13385	32149	19610	9697	15080	8776	17822	6213	11365	24031	16209	11922	8552	13691	13596	9770	18337	18592	9081	12133	9509	13104	14029	16418	15192	10943	16131	16203	25874	18941	31925	17149	27213	19454	11730	8334	11786	16178
ENSG00000084764.6	78	63	165	222	31	527	203	282	342	211	208	125	144	97	154	194	55	198	105	187	85	433	501	192	194	85	85	356	270	274	292	35	104	289	352	141	38	148	177	374	65	81	415	86	496	158	197	186	298
ENSG00000084774.9	14266	6154	5348	3475	4572	4522	3180	3305	8575	8253	12062	6494	6259	11752	17105	4046	12198	11692	2224	7665	9991	6359	5672	7368.02	3986	4228	4622	8919	5538	3811	14096	3303	5371	4225	11005	2648	13369	14775	5151	8451	4454	8525	8800	17114	11947	3439	3631	5311	3826
ENSG00000085063.10	95924.95	56646	29602	16689	78109	15779	201012.45	16352	50731	19969	15863	13477	73855.43	87031.64	19680	100472	28920	110497.96	16103	80848.44	127740.79	52516.32	21169	35971.02	31346	20118	45304	31837	84308.83	44758	20629	47454	34080.97	32217	35249	14702	28383	127806.25	31852	67567	104076	103770.9	45952	60915.99	46487	48006	22163	34914.76	51950
ENSG00000085117.7	772	802	2468	2711	1056	827	701	1118	4512	3267	1989	3463	651	1752	1825	2603	799	627	172	3068	2824	6757	1283	2534	1924	2699	576	882	304	507	2709	875	683	715	7297	6344	482	1336	5716	2039	447	2324	1446	1178	1313	408	605	1106	3511
ENSG00000085185.11	308	427	313	229	474	869	208	1896	491	340	803	187	526	1121	1457	262	416	376	59	914	404	490	951	1403	256	111	301	232	426	394	819	130	243	448	671	246	307	462	244	773	392	489	396	1306	265	466	198	644	365
ENSG00000085224.16	5945	9709	11280	5077	9689	4428	19729	5341	6918	3380	8020	7822	22282	15468	5891	14586	7003	14124	13969	7864	18458	10386	6869	7881	11545	4188	7306	4527	12763	4619	10613	6434	6006	11636	6050	5773	4462	6803	13204	16429	9887	14601	14710	19930	13313	3808	6217	5258	17849
ENSG00000085231.9	4228	2901	3826	2432	4358	1206	4063	1852	5700	2353	2677	6221	6136	4959	2794	3028	2647	5449	897	2123	7271	2859	1643	1692	3153	3672	1972	4428	5930	1877	3536	3281	3820	2572	3844	7207	3694.96	4196	4350	4864	4223	7582	3649	5602	4799	2051	1792	3178	3710
ENSG00000085265.6	0	0	0	0	0	0	0	0	0	0	0	0	0	0	0	0	0	0	0	0	0	0	0	0	0	0	0	0	0	0	0	0	0	0	0	0	0	0	0	0	0	0	0	0	0	0	0	0	0
ENSG00000085274.11	1328	1755	2577	1303	1897	729	1907	1814	1679	961	1551	3881	4307	2440	1386	2137	1258	2783	1070	870	2596	2055	953	654	2480	2627	1251	1272	2866	1049	2395	1337	1535	2473	1899	2640	1265	994	3225	3058	2452	3442	2929	2486	2949	1137	1918	1349	3166
ENSG00000085276.13	6483	13268	831	1	15618	2546	5474	2981	205	1420	1468	626	775	5044	1537	2241	2647	6289	616	4848.87	27561	8623	3171	6122	41	930	9540	2377	8598	3501	1949	9532	62	5	2161	1134	3472	9768.04	2736	17163	325	4597	1542	8932	2134	3466	216	1275	120
ENSG00000085365.13	3799	4532	7603	3491	6786	1883	8034	3073	7955	2845	3899	10235	12909	7360	3418	20512	3852	12781	1717	3185.34	8970	6218	3140	2652	8705	8764	3884	4749	8915	4082	5526	6259	4832	6247	5286	5427	3473	4510	7485	9976	8341	11764	10736	8600	10035	3365	4807	2619	10049
ENSG00000085377.9	1743	1401	1511	2767	1958	1287	1376	1624	2267	3012	1524	3067	2962	5836	2075	1857	896	3061	448	1636	2780	1697	1829	1560	1950	2435	1274	1169	2333	1159	1786	1064	1400	1209	2527	2649	1232	2505	1365	2718	2333	2865	2474	3984	1648	1256	1115	1488	2455
ENSG00000085382.7	1028	1353	2401	1117	1979	661	2110	1034	1460	804	1385	1728	3707	2510	1078	2908	1642	2262	1343	886	2495	2126	780	942	2383	1554	1142	855	2523	999	2017	1231	1383	2466	1581	1591	1063	1236	2340	4107	1778	2629	3799	2867	3772	1115	1770	991	2680
ENSG00000085415.11	2054	2738	3900	1502	2413	1225	3721	856	6011	2652	2288	6533	6134	4345	1928	5361	1869	8558	1452	1209	4142	2415	1578	1124	3372	7528	1573	3093	4534	2232	3255	1988	3369	2616	3023	4698	3309	2605	3637	4565	4877	6920	4858	6999	7254	2112	2252	2075	3475
ENSG00000085433.11	2000	3744	3311	2671	2777	504	3122	978	2803	1866	1273	5094	4477	3727	2228	2796	1255	3534	1523	1912	4340	2368	890	1665	1980	2511	2173	1517	3071	964	1620	1710	1480	3350	1483	3237	1269	2409	2914	3526	2917	4118	3087	4043	3087	1316	2266	1389	3540
ENSG00000085449.10	12619.95	12648	17881	26473	18502	4006	15302	5364	14082	5338	5258	16686	22542	21103	7980	27248	4747	21190	4933	7684	27531	16604	4635	6964	24413	13155	8881	9470	23380	7197	7983	11236	6924	11012	8558	16301	4294	18839	17700	16772	14524	26750	19378	19075	17430	6649	12009	8161.17	28571
ENSG00000085465.11	1	58	21	23	36	44	14	32	0	13	64	60	127	52	88	22	12	8	34	39	55	61	39	60	31	128	29	11	15	12	118	26	35	73	13	97	19	0	32	0	69	46	32	78	26	28	26	31	55
ENSG00000085491.11	7500	5636	9670	3694	7170	1676	4528	3480	8052	5856	7882	6682	10564	9104	3407	6391	9944	8573	3085	5057	8357	5453	2522	4013	5108	5813	4138	4911	7557	3014	10328	5135	5195	5583	7541	4743	10841	6362	7378	8971	7084	9902	8583	8439	13198	3592	4429	5083	6931
ENSG00000085511.15	2392	2682	3357	1017	3247	1463	3524	2145	3275	2335	3010	6426	6172	4267	2845	3918	3429	5324	1142	1505	4412	4305	1608	1337	3827	5102	1620	2801	3438	1027	4296	2134	2652	4521	3119	5773	3380	3184	6595	6002	3113	4859	7832	5937	7983	1531	2870	1440	4564
ENSG00000085514.11	0	7	9	0	5	2	2	47	0	0	11	4	6	3	0	3	0	3	0	0	0	13	40	23.04	13	0	11	0	1	11	0	0	4	5	0	3	0	0	1	3	6.09	0	6	0	0	33	3	59	0
ENSG00000085552.12	0	0	0	0	0	2	2	13	0	5645	223	500	0	0	131	0	181	0	96	3	7	0	0	4	0	770	0	0	1	15	258	0	0	0	27	2367	197	0	6	0	0	1	4	0	2	0	0	223	2
ENSG00000085563.10	5750	41	101	243	1646	0	122	1	0	0	298	2	20	436	3491	105	1168	171	9	129	484	1152	5	90	0	5	37	32	107	1	423	281	1	73	139	2	1154	9952	108	1208	22	274	63	566	147	0	4	0	42
ENSG00000085644.9	608	383	321	631	530	461	278	767	695	605	1489	1506	652	663	1202	636	250	716	235	436	485	976	741	730	397	820	342	481	605	353	1579	196	415	556	847	1053	366	367	681	991	402	610	1009	1378	829	473	443	390	430
ENSG00000085662.9	4053	3058	20112	3331	3887	4997	3058	2487	7793	2039	3005	2188	1796	2743	4492	2774	5940	2862	785	3025	6579	9398	5940	1724	3633	3328	2045	1377	3838	4271	3630	3554	5098	5290	5270	4602	11623	8815	4548	5126	686	4379	3949	3277	2075	2481	3890	2003	6008
ENSG00000085719.7	8639.99	8401	11817	6824	7278	4873	14390	6310	10568	8493	8358	11741	18124	9107	8205	13974	7428	16199	2355	6201	8899	14188	6803	4375	13081	8968	4512	10714	9383	5064	10836	4473	10597	14094	6658	8939	8685	10129	10555	21334	8065	17385	13754	14735	19803	4682	9434	5616	19825
ENSG00000085721.8	4171.25	3856.36	4586.3	4521.02	3990.34	1842.79	3616.34	2962.04	4819.7	3381	4347.22	11192.05	8589.64	6576.86	2726.88	6134.97	2740.86	6279.97	1764.93	2026.18	6916.22	4528.38	2455.2	2194.09	2706.29	7108.03	2328.84	3144.85	4340.83	2278	4987.74	3032.6	2831.64	2451.22	3976.15	7742.7	3942.36	4487.01	5392.77	4357.81	5377.93	7209.69	5893.46	5308.99	5521.9	2394.04	2282.54	2444.38	5675.43
ENSG00000085733.11	24265	22121	26888	16095	31122	9401	48237	6309	29863	19407	22734	29080	39831	33303	24016	34022	21791	55716	11253	20364.34	42945	40723	13394	20068	24174	36123	15627	17474	49049	16565	27780	16179	16448	27944	16235	41151	19483.99	14496	34722	42307	24395	41572	57798	41176	45951	18942	20249	21153	26457
ENSG00000085741.8	0	0	0	0	2	55	10	1	16	0	15	21	7	12	52	40	0	18	0	0	4	4	89	0	20	1	0	0	47	29	14	0	9	3257	62	4	0	0	20	4	19	0	11	6	0	0	408	408	39
ENSG00000085760.10	1956	1618	2333	1874	2243	1089	2930	1461	2637	1929	2201	7772	4395	2541	1303	3027	1912	4314	2437	747	4085	2432	1532	714	2482	5281	1031	2174	3316	986	3092	1518	2356	2794	1920	5127	1921	1728	4228	4161	1772	4098	3665	3677	4524	944	1263	1899	3268
ENSG00000085788.9	3714	4394	3028	2948	4553	1152	3360	2929	3237	2691	3098	3975	8049	4560	4556	4048	3103	2838	2700	2090	5618	2881	1702	2498	5063	3457	3194	2778	5586	1759	4096	2544	2227	5071	2997	3025	3419	4117	3218	5647	4770	8260	3181	6700	4153	1928	3016	2657	6130
ENSG00000085831.11	124	51	9	45	15	0	204	21	24	643	1139	942	330	91	1724	105	1263	34	31	253	43	113	0	64	18	520	75	0	76	0	1689	43	25	371	20	1686	591	76	29	79	63	291	136	156	84	0	34	2	18
ENSG00000085832.12	6512	8063	7606	24695	7164	5510	9232	4460	9957	3272	5499	7076	39135	11426	4574	14763	3942	11121	5772	5033.53	8355	8865	7950	3898	9495	6047	5696	6273	17613	5694	7405	4628	6969	11820	5709	6442	3575	7566	10535	13027	18352	25076	12118	20257	11639	5452	6995	7610	12914
ENSG00000085840.8	1334	953	482	489	817	37	614	694	1522	1664	202	36	263	562	258	63	1499	1550	26	139	1163	67	33	217	202	28	387	643	308	132	316	514	813	169	941	24	3305	1601	32	818	161	1510	417	1485	1684	185	71	42	404
ENSG00000085871.4	1987	1518	342	217	2532	197	159	391	154	1281	487	481	3457	1362	680	538	1249	349	82	2118	2765	73	345	1508	251	680	981	429	713	200	748	1400	90	105	439	774	1099	2305	139	138	2960	3271	47	2082	68	254	60	313	358
ENSG00000085872.10	829	830	565	572	463	848	259	1272	1197	631	1610	509	599	1013	1980	230	1283	557	172	1006	607	537	1164	1690	517	235	828	453	427	375	1539	94	562	651	832	376.99	1374	1029	293	557	453	510	424	987	575	509	394	894	488
[truncated: 46,482 more rows]
[truncated: 57 more columns]
