# Supplementary material for: A limited set of transcriptional programs define major cell types
Source: HighWire-hosted journal article supplement (doi:10.1101/gr.263186.120), 2020-07-01
Supplement: Supplemental_table_S7.xlsx [file Supplemental_table_S7.xlsx]

## Sheet: README
Table S7: List of 2871 cell type specific genes.

## Sheet: Table_S7
gene_id	FDR	Cell Type
ENSG00000163788.9	1e-169	Endothelial
ENSG00000129657.10	5.2e-140	Endothelial
ENSG00000186105.7	1.4e-124	Endothelial
ENSG00000204301.5	1e-123	Endothelial
ENSG00000110799.9	4.7e-118	Endothelial
ENSG00000100034.9	1.5e-108	Endothelial
ENSG00000105483.12	6.9e-101	Endothelial
ENSG00000138190.12	3.7e-98	Endothelial
ENSG00000186642.11	3.9e-92	Endothelial
ENSG00000180884.9	1.8e-91	Endothelial
ENSG00000010327.6	9.6e-90	Endothelial
ENSG00000268027.1	3.9e-88	Endothelial
ENSG00000268001.1	2.4e-87	Endothelial
ENSG00000068001.9	4.3e-87	Endothelial
ENSG00000095370.15	1.9e-80	Endothelial
ENSG00000173269.9	2.2e-80	Endothelial
ENSG00000154016.9	3.3e-78	Endothelial
ENSG00000185361.4	3.8e-77	Endothelial
ENSG00000104903.4	2.4e-75	Endothelial
ENSG00000186994.7	7e-75	Endothelial
ENSG00000158352.11	5e-74	Endothelial
ENSG00000263394.1	5.3e-74	Endothelial
ENSG00000100060.13	6.3e-74	Endothelial
ENSG00000167984.12	1.2e-72	Endothelial
ENSG00000037280.11	2.4e-71	Endothelial
ENSG00000251322.3	2.4e-69	Endothelial
ENSG00000188511.8	1.1e-66	Endothelial
ENSG00000010319.2	5.7e-66	Endothelial
ENSG00000117707.11	1.7e-65	Endothelial
ENSG00000228401.3	2e-65	Endothelial
ENSG00000130307.7	1.3e-63	Endothelial
ENSG00000172889.11	7.7e-63	Endothelial
ENSG00000164867.6	1.4e-62	Endothelial
ENSG00000154133.10	3e-62	Endothelial
ENSG00000196329.6	3.6e-62	Endothelial
ENSG00000064989.8	8.2e-62	Endothelial
ENSG00000105122.8	4.5e-60	Endothelial
ENSG00000108622.6	6.3e-60	Endothelial
ENSG00000183748.4	2.3e-59	Endothelial
ENSG00000105538.4	9.9e-59	Endothelial
ENSG00000088387.13	1.6e-57	Endothelial
ENSG00000198691.7	3.2e-57	Endothelial
ENSG00000171115.3	3.9e-57	Endothelial
ENSG00000257093.2	2.3e-56	Endothelial
ENSG00000047617.10	2.5e-56	Endothelial
ENSG00000162817.6	3.3e-55	Endothelial
ENSG00000157510.9	1.1e-54	Endothelial
ENSG00000179144.4	1.7e-54	Endothelial
ENSG00000101445.5	1.2e-53	Endothelial
ENSG00000156313.8	2.5e-53	Endothelial
ENSG00000111490.8	2.9e-53	Endothelial
ENSG00000124019.9	3.1e-53	Endothelial
ENSG00000261707.1	1.6e-52	Endothelial
ENSG00000189152.6	1.8e-52	Endothelial
ENSG00000007908.11	2.6e-52	Endothelial
ENSG00000130158.9	3e-52	Endothelial
ENSG00000138604.5	3e-52	Endothelial
ENSG00000003400.10	3.8e-52	Endothelial
ENSG00000133574.5	7.1e-51	Endothelial
ENSG00000263586.1	1e-50	Endothelial
ENSG00000120318.11	2.5e-50	Endothelial
ENSG00000074660.11	2.9e-50	Endothelial
ENSG00000269086.2	4.2e-50	Endothelial
ENSG00000169291.5	8.1e-50	Endothelial
ENSG00000138722.5	1.9e-49	Endothelial
ENSG00000254838.4	2.2e-49	Endothelial
ENSG00000152689.13	3.8e-49	Endothelial
ENSG00000132334.12	6.6e-49	Endothelial
ENSG00000133561.11	7.3e-49	Endothelial
ENSG00000158683.3	1.4e-48	Endothelial
ENSG00000198945.3	1.5e-48	Endothelial
ENSG00000163762.2	1.9e-48	Endothelial
ENSG00000170989.8	3.2e-48	Endothelial
ENSG00000136111.8	1e-47	Endothelial
ENSG00000107719.8	1.6e-47	Endothelial
ENSG00000146021.10	2.6e-47	Endothelial
ENSG00000174749.5	6.7e-47	Endothelial
ENSG00000188559.9	8.2e-47	Endothelial
ENSG00000161940.6	6.4e-46	Endothelial
ENSG00000128512.15	7.7e-46	Endothelial
ENSG00000267583.1	1.4e-45	Endothelial
ENSG00000167680.11	3.4e-45	Endothelial
ENSG00000203883.5	7.2e-45	Endothelial
ENSG00000120586.4	7.3e-45	Endothelial
ENSG00000184113.8	2.3e-44	Endothelial
ENSG00000213203.2	4.1e-44	Endothelial
ENSG00000170323.4	8e-44	Endothelial
ENSG00000027075.9	1e-43	Endothelial
ENSG00000162511.7	1.3e-43	Endothelial
ENSG00000137960.5	1.5e-43	Endothelial
ENSG00000173535.9	3.2e-43	Endothelial
ENSG00000178075.15	4e-43	Endothelial
ENSG00000218792.2	9.4e-43	Endothelial
ENSG00000007129.13	1.4e-42	Endothelial
ENSG00000180353.6	2.6e-42	Endothelial
ENSG00000127329.10	1.2e-41	Endothelial
ENSG00000225938.1	1.2e-41	Endothelial
ENSG00000160145.11	2.7e-41	Endothelial
ENSG00000249751.1	3.7e-41	Endothelial
ENSG00000198355.4	4.3e-41	Endothelial
ENSG00000151702.12	6e-41	Endothelial
ENSG00000179044.11	6.5e-41	Endothelial
ENSG00000105967.11	7.7e-41	Endothelial
ENSG00000139549.2	3e-40	Endothelial
ENSG00000175155.4	3.1e-40	Endothelial
ENSG00000102010.10	6.1e-40	Endothelial
ENSG00000162367.7	1.2e-39	Endothelial
ENSG00000103966.5	2.7e-39	Endothelial
ENSG00000184497.8	3.1e-39	Endothelial
ENSG00000145911.5	4.9e-39	Endothelial
ENSG00000267107.2	5.4e-39	Endothelial
ENSG00000104938.12	6e-39	Endothelial
ENSG00000204403.5	6e-39	Endothelial
ENSG00000205502.3	1.4e-38	Endothelial
ENSG00000130755.8	6.6e-38	Endothelial
ENSG00000241717.1	8.1e-38	Endothelial
ENSG00000226702.1	5.9e-37	Endothelial
ENSG00000270547.1	1.1e-36	Endothelial
ENSG00000235505.3	2.4e-36	Endothelial
ENSG00000141655.11	2.5e-36	Endothelial
ENSG00000115194.6	3.1e-36	Endothelial
ENSG00000155849.11	8.3e-36	Endothelial
ENSG00000197245.4	1.9e-35	Endothelial
ENSG00000180448.6	2.1e-35	Endothelial
ENSG00000138835.18	2.2e-35	Endothelial
ENSG00000175048.12	4.3e-35	Endothelial
ENSG00000151967.14	8.6e-35	Endothelial
ENSG00000066056.9	1.2e-34	Endothelial
ENSG00000230006.3	1.9e-34	Endothelial
ENSG00000185112.4	2.7e-34	Endothelial
ENSG00000167236.2	2.9e-34	Endothelial
ENSG00000076356.6	4.6e-34	Endothelial
ENSG00000154783.6	4.6e-34	Endothelial
ENSG00000179776.13	8.9e-34	Endothelial
ENSG00000170542.5	9.7e-34	Endothelial
ENSG00000198478.6	1.5e-33	Endothelial
ENSG00000004468.8	2.8e-33	Endothelial
ENSG00000101306.6	5e-33	Endothelial
ENSG00000125810.9	6.2e-33	Endothelial
ENSG00000136237.14	8.6e-33	Endothelial
ENSG00000228495.1	9.3e-33	Endothelial
ENSG00000102362.11	1.2e-32	Endothelial
ENSG00000147113.12	1.6e-32	Endothelial
ENSG00000198844.6	1.8e-32	Endothelial
ENSG00000188596.5	2.6e-32	Endothelial
ENSG00000101331.11	6.5e-32	Endothelial
ENSG00000166446.10	8.5e-32	Endothelial
ENSG00000152804.6	1.5e-31	Endothelial
ENSG00000113555.4	1.6e-31	Endothelial
ENSG00000076706.10	2.5e-31	Endothelial
ENSG00000164659.10	2.9e-31	Endothelial
ENSG00000115155.12	3.1e-31	Endothelial
ENSG00000100276.9	7.1e-31	Endothelial
ENSG00000136114.11	7.5e-31	Endothelial
ENSG00000141505.7	9.3e-31	Endothelial
ENSG00000087237.6	1.1e-30	Endothelial
ENSG00000171388.9	1.1e-30	Endothelial
ENSG00000106852.11	1.2e-30	Endothelial
ENSG00000143878.8	1.2e-30	Endothelial
ENSG00000164683.12	1.2e-30	Endothelial
ENSG00000120278.10	1.6e-30	Endothelial
ENSG00000128917.5	2.2e-30	Endothelial
ENSG00000168497.4	2.4e-30	Endothelial
ENSG00000231298.2	3e-30	Endothelial
ENSG00000120279.6	3.3e-30	Endothelial
ENSG00000149564.7	6.9e-30	Endothelial
ENSG00000106560.6	8.4e-30	Endothelial
ENSG00000108798.4	8.6e-30	Endothelial
ENSG00000167261.9	1e-29	Endothelial
ENSG00000065809.9	1.2e-29	Endothelial
ENSG00000233251.3	2.2e-29	Endothelial
ENSG00000122644.8	3.1e-29	Endothelial
ENSG00000269095.1	3.6e-29	Endothelial
ENSG00000104967.6	4.7e-29	Endothelial
ENSG00000128052.8	8.1e-29	Endothelial
ENSG00000152818.14	1e-28	Endothelial
ENSG00000136011.10	2.9e-28	Endothelial
ENSG00000269155.1	3.8e-28	Endothelial
ENSG00000071246.6	4.6e-28	Endothelial
ENSG00000135636.9	6.6e-28	Endothelial
ENSG00000168961.12	8.4e-28	Endothelial
ENSG00000099889.9	1e-27	Endothelial
ENSG00000091879.9	1.4e-27	Endothelial
ENSG00000129538.9	1.4e-27	Endothelial
ENSG00000260940.1	1.5e-27	Endothelial
ENSG00000120337.7	1.7e-27	Endothelial
ENSG00000086991.8	1.8e-27	Endothelial
ENSG00000071073.8	3e-27	Endothelial
ENSG00000157570.7	3.2e-27	Endothelial
ENSG00000260996.1	3.7e-27	Endothelial
ENSG00000165434.6	4e-27	Endothelial
ENSG00000163239.8	4.7e-27	Endothelial
ENSG00000167434.5	4.8e-27	Endothelial
ENSG00000261269.1	8e-27	Endothelial
ENSG00000178175.7	8.7e-27	Endothelial
ENSG00000153391.11	2.6e-26	Endothelial
ENSG00000175967.3	3.1e-26	Endothelial
ENSG00000165716.5	3.5e-26	Endothelial
ENSG00000164849.7	3.7e-26	Endothelial
ENSG00000137877.8	4.1e-26	Endothelial
ENSG00000196411.5	4.1e-26	Endothelial
ENSG00000215183.4	4.9e-26	Endothelial
ENSG00000103034.10	5.3e-26	Endothelial
ENSG00000137486.12	7.7e-26	Endothelial
ENSG00000066735.10	7.8e-26	Endothelial
ENSG00000124772.7	8.2e-26	Endothelial
ENSG00000174804.3	8.7e-26	Endothelial
ENSG00000099282.5	1.1e-25	Endothelial
ENSG00000182240.11	1.1e-25	Endothelial
ENSG00000204161.9	1.3e-25	Endothelial
ENSG00000005108.11	1.5e-25	Endothelial
ENSG00000160180.14	1.5e-25	Endothelial
ENSG00000142798.12	1.7e-25	Endothelial
ENSG00000185291.6	2e-25	Endothelial
ENSG00000120156.16	2.1e-25	Endothelial
ENSG00000230309.1	3.9e-25	Endothelial
ENSG00000137474.15	5.7e-25	Endothelial
ENSG00000158715.5	6e-25	Endothelial
ENSG00000262292.2	6.4e-25	Endothelial
ENSG00000128567.12	7.3e-25	Endothelial
ENSG00000102271.9	1e-24	Endothelial
ENSG00000164035.5	1.3e-24	Endothelial
ENSG00000196628.9	1.4e-24	Endothelial
ENSG00000198771.6	1.7e-24	Endothelial
ENSG00000205038.7	1.9e-24	Endothelial
ENSG00000136404.11	2.6e-24	Endothelial
ENSG00000176435.6	2.8e-24	Endothelial
ENSG00000270157.1	3.9e-24	Endothelial
ENSG00000105851.6	4.2e-24	Endothelial
ENSG00000183873.11	4.5e-24	Endothelial
ENSG00000197142.6	6.1e-24	Endothelial
ENSG00000064763.6	6.7e-24	Endothelial
ENSG00000146521.5	8e-24	Endothelial
ENSG00000089820.11	1.1e-23	Endothelial
ENSG00000129422.9	1.1e-23	Endothelial
ENSG00000133800.4	1.2e-23	Endothelial
ENSG00000213494.5	1.3e-23	Endothelial
ENSG00000121966.6	2.5e-23	Endothelial
ENSG00000106025.4	2.8e-23	Endothelial
ENSG00000118407.10	5e-23	Endothelial
ENSG00000140181.10	5.7e-23	Endothelial
ENSG00000197872.7	5.9e-23	Endothelial
ENSG00000085871.4	6.4e-23	Endothelial
ENSG00000105499.9	9.2e-23	Endothelial
ENSG00000183785.10	2e-22	Endothelial
ENSG00000172738.7	2.1e-22	Endothelial
ENSG00000175471.15	2.7e-22	Endothelial
ENSG00000121764.7	4.2e-22	Endothelial
ENSG00000172578.7	4.2e-22	Endothelial
ENSG00000122378.9	4.5e-22	Endothelial
ENSG00000142405.17	5.1e-22	Endothelial
ENSG00000135604.9	5.6e-22	Endothelial
ENSG00000138185.12	6.3e-22	Endothelial
ENSG00000175556.12	1.3e-21	Endothelial
ENSG00000137878.12	1.9e-21	Endothelial
ENSG00000140465.9	2.3e-21	Endothelial
ENSG00000164512.13	2.7e-21	Endothelial
ENSG00000167874.6	2.8e-21	Endothelial
ENSG00000111261.9	3.2e-21	Endothelial
ENSG00000185442.8	5.7e-21	Endothelial
ENSG00000122679.4	6.4e-21	Endothelial
ENSG00000175746.4	6.4e-21	Endothelial
ENSG00000143434.11	6.9e-21	Endothelial
ENSG00000227764.1	6.9e-21	Endothelial
ENSG00000272003.1	7.3e-21	Endothelial
ENSG00000260391.2	1.1e-20	Endothelial
ENSG00000271978.1	1.1e-20	Endothelial
ENSG00000156298.8	1.3e-20	Endothelial
ENSG00000119630.9	2e-20	Endothelial
ENSG00000111348.4	2.3e-20	Endothelial
ENSG00000139187.5	2.3e-20	Endothelial
ENSG00000177842.7	2.9e-20	Endothelial
ENSG00000127920.5	4.6e-20	Endothelial
ENSG00000197943.5	5.6e-20	Endothelial
ENSG00000213648.6	5.7e-20	Endothelial
ENSG00000174059.12	6.7e-20	Endothelial
ENSG00000133056.9	6.9e-20	Endothelial
ENSG00000178695.4	7.7e-20	Endothelial
ENSG00000091428.13	8.4e-20	Endothelial
ENSG00000128284.15	8.4e-20	Endothelial
ENSG00000022567.5	1.1e-19	Endothelial
ENSG00000128271.15	1.1e-19	Endothelial
ENSG00000081189.9	1.4e-19	Endothelial
ENSG00000182885.12	1.4e-19	Endothelial
ENSG00000126785.8	1.7e-19	Endothelial
ENSG00000271738.1	1.7e-19	Endothelial
ENSG00000255508.3	2.4e-19	Endothelial
ENSG00000189056.9	2.5e-19	Endothelial
ENSG00000150625.12	3.2e-19	Endothelial
ENSG00000231981.3	5.2e-19	Endothelial
ENSG00000125089.12	6.9e-19	Endothelial
ENSG00000116833.9	7e-19	Endothelial
ENSG00000130300.4	7.8e-19	Endothelial
ENSG00000213089.4	8.4e-19	Endothelial
ENSG00000068615.12	1.2e-18	Endothelial
ENSG00000069122.14	1.3e-18	Endothelial
ENSG00000171864.4	2.7e-18	Endothelial
ENSG00000271897.1	2.7e-18	Endothelial
ENSG00000260566.2	3.1e-18	Endothelial
ENSG00000153162.8	3.9e-18	Endothelial
ENSG00000176134.4	3.9e-18	Endothelial
ENSG00000168309.12	4.3e-18	Endothelial
ENSG00000163131.6	5.9e-18	Endothelial
ENSG00000046889.14	7e-18	Endothelial
ENSG00000215142.4	7.4e-18	Endothelial
ENSG00000235387.1	7.4e-18	Endothelial
ENSG00000214226.4	1.1e-17	Endothelial
ENSG00000140511.7	1.4e-17	Endothelial
ENSG00000170011.9	2.1e-17	Endothelial
ENSG00000162616.8	2.4e-17	Endothelial
ENSG00000114698.10	3.1e-17	Endothelial
ENSG00000263155.1	4e-17	Endothelial
ENSG00000174175.12	4.4e-17	Endothelial
ENSG00000167972.9	4.7e-17	Endothelial
ENSG00000127533.3	5.1e-17	Endothelial
ENSG00000198435.2	5.1e-17	Endothelial
ENSG00000124406.12	8.2e-17	Endothelial
ENSG00000177675.4	9.9e-17	Endothelial
ENSG00000185020.5	1.6e-16	Endothelial
ENSG00000186466.4	1.9e-16	Endothelial
ENSG00000164161.5	2e-16	Endothelial
ENSG00000155307.13	2.3e-16	Endothelial
ENSG00000126882.8	2.4e-16	Endothelial
ENSG00000154556.13	3e-16	Endothelial
ENSG00000154529.10	3.1e-16	Endothelial
ENSG00000099260.6	3.3e-16	Endothelial
ENSG00000073146.11	3.4e-16	Endothelial
ENSG00000173926.5	4.4e-16	Endothelial
ENSG00000235920.1	5.3e-16	Endothelial
ENSG00000160447.6	5.7e-16	Endothelial
ENSG00000152953.8	6.5e-16	Endothelial
ENSG00000043462.7	6.7e-16	Endothelial
ENSG00000156750.7	7.5e-16	Endothelial
ENSG00000244476.2	8.3e-16	Endothelial
ENSG00000163072.10	9.5e-16	Endothelial
ENSG00000112759.12	1.1e-15	Endothelial
ENSG00000136869.13	1.2e-15	Endothelial
ENSG00000132514.9	1.3e-15	Endothelial
ENSG00000167861.11	1.4e-15	Endothelial
ENSG00000157554.14	1.6e-15	Endothelial
ENSG00000197291.4	1.7e-15	Endothelial
ENSG00000054219.9	1.8e-15	Endothelial
ENSG00000166257.4	2e-15	Endothelial
ENSG00000139567.8	3.6e-15	Endothelial
ENSG00000171435.9	3.8e-15	Endothelial
ENSG00000087842.6	4.1e-15	Endothelial
ENSG00000232433.2	4.6e-15	Endothelial
ENSG00000180229.8	6.6e-15	Endothelial
ENSG00000078401.6	7.8e-15	Endothelial
ENSG00000196169.10	8.6e-15	Endothelial
ENSG00000184349.8	1.3e-14	Endothelial
ENSG00000130201.3	1.4e-14	Endothelial
ENSG00000005249.8	1.5e-14	Endothelial
ENSG00000162618.8	1.5e-14	Endothelial
ENSG00000177464.4	1.5e-14	Endothelial
ENSG00000230438.5	1.6e-14	Endothelial
ENSG00000240240.4	1.8e-14	Endothelial
ENSG00000260604.1	1.8e-14	Endothelial
ENSG00000148677.6	2e-14	Endothelial
ENSG00000184307.9	2.6e-14	Endothelial
ENSG00000162174.8	2.9e-14	Endothelial
ENSG00000073849.10	3e-14	Endothelial
ENSG00000230266.1	3.1e-14	Endothelial
ENSG00000235770.1	3.4e-14	Endothelial
ENSG00000099937.6	3.7e-14	Endothelial
ENSG00000131477.6	3.7e-14	Endothelial
ENSG00000204131.6	3.7e-14	Endothelial
ENSG00000230479.1	4.2e-14	Endothelial
ENSG00000204136.6	4.5e-14	Endothelial
ENSG00000234409.4	4.5e-14	Endothelial
ENSG00000130052.9	4.9e-14	Endothelial
ENSG00000165507.8	5.2e-14	Endothelial
ENSG00000147862.10	5.3e-14	Endothelial
ENSG00000140968.6	5.9e-14	Endothelial
ENSG00000135312.4	7.3e-14	Endothelial
ENSG00000163751.3	7.3e-14	Endothelial
ENSG00000223953.3	8e-14	Endothelial
ENSG00000160219.7	8.2e-14	Endothelial
ENSG00000117245.8	9.5e-14	Endothelial
ENSG00000248441.2	1e-13	Endothelial
ENSG00000244701.1	1.3e-13	Endothelial
ENSG00000105784.11	1.8e-13	Endothelial
ENSG00000153208.12	1.9e-13	Endothelial
ENSG00000183813.6	1.9e-13	Endothelial
ENSG00000173267.9	2.1e-13	Endothelial
ENSG00000178162.4	2.4e-13	Endothelial
ENSG00000224459.1	2.7e-13	Endothelial
ENSG00000166265.7	2.9e-13	Endothelial
ENSG00000196774.3	4.3e-13	Endothelial
ENSG00000156453.9	4.6e-13	Endothelial
ENSG00000267976.1	4.8e-13	Endothelial
ENSG00000110328.5	5.5e-13	Endothelial
ENSG00000170379.15	5.9e-13	Endothelial
ENSG00000182022.13	7.5e-13	Endothelial
ENSG00000165092.8	8.2e-13	Endothelial
ENSG00000004399.8	8.7e-13	Endothelial
ENSG00000183186.6	8.8e-13	Endothelial
ENSG00000177294.6	1e-12	Endothelial
ENSG00000156049.6	1.2e-12	Endothelial
ENSG00000134215.11	1.3e-12	Endothelial
ENSG00000187513.8	1.3e-12	Endothelial
ENSG00000101265.11	1.4e-12	Endothelial
ENSG00000179314.9	1.4e-12	Endothelial
ENSG00000101096.15	1.5e-12	Endothelial
ENSG00000118777.6	1.8e-12	Endothelial
ENSG00000125266.6	2.2e-12	Endothelial
ENSG00000138411.6	2.8e-12	Endothelial
ENSG00000132622.6	2.9e-12	Endothelial
ENSG00000170891.6	3.3e-12	Endothelial
ENSG00000128849.9	3.5e-12	Endothelial
ENSG00000182253.10	4.3e-12	Endothelial
ENSG00000249867.1	4.3e-12	Endothelial
ENSG00000137968.12	6.4e-12	Endothelial
ENSG00000203635.2	6.5e-12	Endothelial
ENSG00000237792.3	6.6e-12	Endothelial
ENSG00000224185.1	6.8e-12	Endothelial
ENSG00000121797.9	7.8e-12	Endothelial
ENSG00000184005.9	8.3e-12	Endothelial
ENSG00000003147.13	8.8e-12	Endothelial
ENSG00000196562.10	1e-11	Endothelial
ENSG00000102048.11	1.6e-11	Endothelial
ENSG00000171056.6	1.6e-11	Endothelial
ENSG00000129467.9	1.8e-11	Endothelial
ENSG00000227921.1	1.9e-11	Endothelial
ENSG00000161835.6	2.6e-11	Endothelial
ENSG00000140873.11	2.7e-11	Endothelial
ENSG00000111859.12	3e-11	Endothelial
ENSG00000234358.1	3.2e-11	Endothelial
ENSG00000260064.1	3.2e-11	Endothelial
ENSG00000214456.4	3.4e-11	Endothelial
ENSG00000079385.17	3.7e-11	Endothelial
ENSG00000173597.4	5e-11	Endothelial
ENSG00000176595.3	5e-11	Endothelial
ENSG00000244300.2	5e-11	Endothelial
ENSG00000248890.1	5.5e-11	Endothelial
ENSG00000167037.14	6.3e-11	Endothelial
ENSG00000196872.6	6.9e-11	Endothelial
ENSG00000135363.7	7.2e-11	Endothelial
ENSG00000143869.5	7.2e-11	Endothelial
ENSG00000223786.1	8.4e-11	Endothelial
ENSG00000149781.8	8.8e-11	Endothelial
ENSG00000233818.1	9.9e-11	Endothelial
ENSG00000038295.3	1e-10	Endothelial
ENSG00000114279.9	1e-10	Endothelial
ENSG00000135063.13	1.1e-10	Endothelial
ENSG00000158560.10	1.1e-10	Endothelial
ENSG00000234416.1	1.1e-10	Endothelial
ENSG00000114541.10	1.3e-10	Endothelial
ENSG00000142185.12	1.3e-10	Endothelial
ENSG00000183578.5	1.3e-10	Endothelial
ENSG00000100368.9	1.4e-10	Endothelial
ENSG00000125378.11	1.4e-10	Endothelial
ENSG00000074527.7	1.5e-10	Endothelial
ENSG00000204397.3	1.6e-10	Endothelial
ENSG00000182851.2	2.1e-10	Endothelial
ENSG00000144668.7	2.4e-10	Endothelial
ENSG00000169744.8	2.6e-10	Endothelial
ENSG00000176641.6	2.7e-10	Endothelial
ENSG00000125878.4	3e-10	Endothelial
ENSG00000155093.13	3.3e-10	Endothelial
ENSG00000172031.6	3.4e-10	Endothelial
ENSG00000118308.10	3.5e-10	Endothelial
ENSG00000164283.8	3.5e-10	Endothelial
ENSG00000184916.4	3.6e-10	Endothelial
ENSG00000101842.9	3.7e-10	Endothelial
ENSG00000043591.4	4.2e-10	Endothelial
ENSG00000229372.1	5.2e-10	Endothelial
ENSG00000174640.8	6e-10	Endothelial
ENSG00000164687.6	6.4e-10	Endothelial
ENSG00000186827.6	7.7e-10	Endothelial
ENSG00000130584.6	7.8e-10	Endothelial
ENSG00000258610.1	8.3e-10	Endothelial
ENSG00000162654.8	1.1e-09	Endothelial
ENSG00000249242.3	1.1e-09	Endothelial
ENSG00000003436.10	1.2e-09	Endothelial
ENSG00000226197.2	1.3e-09	Endothelial
ENSG00000132688.10	1.4e-09	Endothelial
ENSG00000164684.9	1.4e-09	Endothelial
ENSG00000198208.7	1.9e-09	Endothelial
ENSG00000163083.5	2e-09	Endothelial
ENSG00000165949.8	2e-09	Endothelial
ENSG00000254703.2	2.1e-09	Endothelial
ENSG00000057704.6	2.2e-09	Endothelial
ENSG00000150048.6	2.2e-09	Endothelial
ENSG00000260396.1	3e-09	Endothelial
ENSG00000136383.6	3.1e-09	Endothelial
ENSG00000159640.10	3.6e-09	Endothelial
ENSG00000263917.1	4.2e-09	Endothelial
ENSG00000169248.8	6.8e-09	Endothelial
ENSG00000113763.6	7.1e-09	Endothelial
ENSG00000227318.4	8e-09	Endothelial
ENSG00000203632.3	8.4e-09	Endothelial
ENSG00000100191.4	9.1e-09	Endothelial
ENSG00000130303.8	9.2e-09	Endothelial
ENSG00000162415.6	9.2e-09	Endothelial
ENSG00000102755.6	9.3e-09	Endothelial
ENSG00000236029.4	9.4e-09	Endothelial
ENSG00000186479.4	9.6e-09	Endothelial
ENSG00000272449.1	9.7e-09	Endothelial
ENSG00000164736.5	9.8e-09	Endothelial
ENSG00000129946.6	9.9e-09	Endothelial
ENSG00000163219.7	1e-08	Endothelial
ENSG00000166341.6	1e-08	Endothelial
ENSG00000126895.9	1.1e-08	Endothelial
ENSG00000177685.12	1.2e-08	Endothelial
ENSG00000064692.14	1.4e-08	Endothelial
ENSG00000179046.4	1.4e-08	Endothelial
ENSG00000115380.14	1.6e-08	Endothelial
ENSG00000184588.13	1.6e-08	Endothelial
ENSG00000131634.9	2.1e-08	Endothelial
ENSG00000086696.6	2.7e-08	Endothelial
ENSG00000106714.13	2.9e-08	Endothelial
ENSG00000055813.5	3.1e-08	Endothelial
ENSG00000183615.5	3.8e-08	Endothelial
ENSG00000110900.10	4e-08	Endothelial
ENSG00000257207.4	4e-08	Endothelial
ENSG00000237870.2	4.1e-08	Endothelial
ENSG00000158106.8	4.7e-08	Endothelial
ENSG00000167191.7	5.9e-08	Endothelial
ENSG00000204583.5	6.1e-08	Endothelial
ENSG00000224307.1	6.7e-08	Endothelial
ENSG00000198075.5	7.1e-08	Endothelial
ENSG00000100311.12	7.2e-08	Endothelial
ENSG00000257219.1	7.5e-08	Endothelial
ENSG00000229108.1	7.8e-08	Endothelial
ENSG00000229953.1	8e-08	Endothelial
ENSG00000272405.1	9.3e-08	Endothelial
ENSG00000168505.6	1e-07	Endothelial
ENSG00000225380.3	1e-07	Endothelial
ENSG00000166670.5	1.3e-07	Endothelial
ENSG00000154864.7	1.5e-07	Endothelial
ENSG00000243806.1	1.6e-07	Endothelial
ENSG00000129595.8	1.8e-07	Endothelial
ENSG00000232926.1	2.2e-07	Endothelial
ENSG00000271225.1	2.6e-07	Endothelial
ENSG00000086205.12	2.7e-07	Endothelial
ENSG00000175264.3	2.9e-07	Endothelial
ENSG00000122862.4	3e-07	Endothelial
ENSG00000258989.1	3.9e-07	Endothelial
ENSG00000142910.11	4.5e-07	Endothelial
ENSG00000118946.7	4.7e-07	Endothelial
ENSG00000165659.12	4.9e-07	Endothelial
ENSG00000228991.2	5e-07	Endothelial
ENSG00000147408.10	5.2e-07	Endothelial
ENSG00000255450.1	5.2e-07	Endothelial
ENSG00000163995.14	5.3e-07	Endothelial
ENSG00000163638.9	5.4e-07	Endothelial
ENSG00000196468.5	5.5e-07	Endothelial
ENSG00000110848.4	5.9e-07	Endothelial
ENSG00000165140.5	6e-07	Endothelial
ENSG00000232334.1	6.7e-07	Endothelial
ENSG00000159307.14	7.6e-07	Endothelial
ENSG00000169242.7	8.3e-07	Endothelial
ENSG00000198795.6	8.6e-07	Endothelial
ENSG00000160179.14	8.8e-07	Endothelial
ENSG00000240602.3	9e-07	Endothelial
ENSG00000168918.9	9.4e-07	Endothelial
ENSG00000234964.3	9.7e-07	Endothelial
ENSG00000179348.7	9.9e-07	Endothelial
ENSG00000184058.8	9.9e-07	Endothelial
ENSG00000078081.3	1e-06	Endothelial
ENSG00000203876.5	1.1e-06	Endothelial
ENSG00000197261.7	1.4e-06	Endothelial
ENSG00000258667.1	1.4e-06	Endothelial
ENSG00000102760.12	1.5e-06	Endothelial
ENSG00000156218.8	1.5e-06	Endothelial
ENSG00000185737.8	1.5e-06	Endothelial
ENSG00000060140.4	1.6e-06	Endothelial
ENSG00000146411.5	1.6e-06	Endothelial
ENSG00000171189.12	1.6e-06	Endothelial
ENSG00000104951.11	1.7e-06	Endothelial
ENSG00000271894.1	1.9e-06	Endothelial
ENSG00000104432.8	2e-06	Endothelial
ENSG00000213886.3	2e-06	Endothelial
ENSG00000268358.1	2.5e-06	Endothelial
ENSG00000243695.1	2.7e-06	Endothelial
ENSG00000137077.3	3.1e-06	Endothelial
ENSG00000176734.3	3.2e-06	Endothelial
ENSG00000156755.9	3.4e-06	Endothelial
ENSG00000158856.13	3.4e-06	Endothelial
ENSG00000128709.10	4e-06	Endothelial
ENSG00000078596.6	5.1e-06	Endothelial
ENSG00000256671.5	5.5e-06	Endothelial
ENSG00000163687.9	5.7e-06	Endothelial
ENSG00000157404.11	6.6e-06	Endothelial
ENSG00000182132.8	6.9e-06	Endothelial
ENSG00000114654.6	7.2e-06	Endothelial
ENSG00000106540.4	1e-05	Endothelial
ENSG00000136928.4	1.3e-05	Endothelial
ENSG00000168447.6	1.3e-05	Endothelial
ENSG00000134323.10	1.4e-05	Endothelial
ENSG00000179546.3	1.7e-05	Endothelial
ENSG00000226053.1	1.7e-05	Endothelial
ENSG00000255281.1	1.7e-05	Endothelial
ENSG00000087085.9	1.8e-05	Endothelial
ENSG00000135547.4	2.2e-05	Endothelial
ENSG00000145335.11	2.2e-05	Endothelial
ENSG00000128645.11	2.9e-05	Endothelial
ENSG00000232759.1	4.2e-05	Endothelial
ENSG00000008517.12	5.1e-05	Endothelial
ENSG00000254141.1	6e-05	Endothelial
ENSG00000015133.14	6.2e-05	Endothelial
ENSG00000224189.2	6.2e-05	Endothelial
ENSG00000128833.8	6.9e-05	Endothelial
ENSG00000156966.6	7.2e-05	Endothelial
ENSG00000115602.12	7.9e-05	Endothelial
ENSG00000004799.7	0.00012	Endothelial
ENSG00000226363.3	0.00013	Endothelial
ENSG00000268894.2	0.00014	Endothelial
ENSG00000134817.9	0.00017	Endothelial
ENSG00000137672.8	0.00018	Endothelial
ENSG00000186998.11	0.00021	Endothelial
ENSG00000149573.4	0.00024	Endothelial
ENSG00000129682.9	0.00051	Endothelial
ENSG00000075340.18	0.00083	Endothelial
ENSG00000164100.7	0.00087	Endothelial
ENSG00000125869.5	0.0011	Endothelial
ENSG00000162975.3	0.0011	Endothelial
ENSG00000143140.6	0.0016	Endothelial
ENSG00000255690.1	0.0016	Endothelial
ENSG00000159261.6	0.002	Endothelial
ENSG00000005102.8	0.0022	Endothelial
ENSG00000095713.9	0.0025	Endothelial
ENSG00000109193.6	0.0039	Endothelial
ENSG00000111339.6	0.0041	Endothelial
ENSG00000271672.1	0.0072	Endothelial
ENSG00000227507.2	0.0083	Endothelial
ENSG00000196754.6	2.6e-128	Epithelial
ENSG00000102890.10	2.9e-122	Epithelial
ENSG00000125850.6	1.1e-105	Epithelial
ENSG00000155066.11	1.2e-102	Epithelial
ENSG00000184363.5	8.9e-99	Epithelial
ENSG00000196878.8	1.1e-97	Epithelial
ENSG00000092295.7	5.6e-93	Epithelial
ENSG00000168907.9	1.4e-85	Epithelial
ENSG00000189334.4	9.2e-85	Epithelial
ENSG00000147689.12	3.2e-83	Epithelial
ENSG00000143217.7	3.7e-81	Epithelial
ENSG00000132698.9	3.6e-80	Epithelial
ENSG00000065618.12	3e-77	Epithelial
ENSG00000102243.8	3.9e-71	Epithelial
ENSG00000169403.7	2.3e-70	Epithelial
ENSG00000146904.4	1.9e-68	Epithelial
ENSG00000112378.11	3.3e-68	Epithelial
ENSG00000134317.13	2.3e-66	Epithelial
ENSG00000206075.9	3.3e-65	Epithelial
ENSG00000060558.3	7.3e-65	Epithelial
ENSG00000081277.7	7.3e-65	Epithelial
ENSG00000070190.8	6.8e-63	Epithelial
ENSG00000129194.3	6.8e-63	Epithelial
ENSG00000144452.10	8.6e-62	Epithelial
ENSG00000163141.14	2.1e-61	Epithelial
ENSG00000132849.14	4.7e-61	Epithelial
ENSG00000104892.12	1.6e-59	Epithelial
ENSG00000088726.11	1.5e-58	Epithelial
ENSG00000171124.8	4.3e-57	Epithelial
ENSG00000176092.9	4.3e-57	Epithelial
ENSG00000109182.7	4.5e-57	Epithelial
ENSG00000230937.5	7.9e-57	Epithelial
ENSG00000083307.6	1.4e-56	Epithelial
ENSG00000137648.12	3.6e-56	Epithelial
ENSG00000086548.8	3e-55	Epithelial
ENSG00000149418.6	3.1e-55	Epithelial
ENSG00000128422.11	4.3e-55	Epithelial
ENSG00000253313.1	1.9e-54	Epithelial
ENSG00000068078.13	2.7e-54	Epithelial
ENSG00000267368.1	3e-54	Epithelial
ENSG00000104140.6	3.7e-54	Epithelial
ENSG00000129455.11	4.1e-54	Epithelial
ENSG00000132746.10	6.4e-54	Epithelial
ENSG00000124466.8	2.6e-53	Epithelial
ENSG00000205420.6	4.2e-53	Epithelial
ENSG00000175318.7	6.8e-53	Epithelial
ENSG00000106541.7	2.1e-52	Epithelial
ENSG00000166535.15	2.8e-52	Epithelial
ENSG00000175793.10	9e-52	Epithelial
ENSG00000163624.5	1e-51	Epithelial
ENSG00000163220.10	3.7e-51	Epithelial
ENSG00000167608.7	5.3e-51	Epithelial
ENSG00000043039.5	6.6e-51	Epithelial
ENSG00000137440.3	6.6e-51	Epithelial
ENSG00000134757.4	8e-51	Epithelial
ENSG00000165905.12	1.7e-50	Epithelial
ENSG00000101213.5	1.8e-50	Epithelial
ENSG00000140519.8	7.5e-50	Epithelial
ENSG00000006555.6	1.1e-49	Epithelial
ENSG00000186081.7	1.8e-49	Epithelial
ENSG00000151651.11	2.8e-49	Epithelial
ENSG00000241794.1	4.4e-49	Epithelial
ENSG00000172818.5	4.7e-49	Epithelial
ENSG00000110400.6	7.9e-49	Epithelial
ENSG00000134258.12	1.3e-48	Epithelial
ENSG00000172478.13	1.8e-48	Epithelial
ENSG00000120055.5	3.8e-48	Epithelial
ENSG00000171219.8	6.5e-48	Epithelial
ENSG00000176920.10	1.3e-47	Epithelial
ENSG00000183347.13	1.4e-47	Epithelial
ENSG00000170465.9	2.4e-47	Epithelial
ENSG00000117472.5	2.8e-47	Epithelial
ENSG00000183742.8	2.9e-47	Epithelial
ENSG00000102554.9	2e-46	Epithelial
ENSG00000115221.6	2.4e-46	Epithelial
ENSG00000121742.11	3.5e-46	Epithelial
ENSG00000169469.7	3.8e-46	Epithelial
ENSG00000188910.7	1.5e-45	Epithelial
ENSG00000053747.11	6e-45	Epithelial
ENSG00000111012.5	1.4e-44	Epithelial
ENSG00000237289.5	2.9e-44	Epithelial
ENSG00000186832.4	3.4e-44	Epithelial
ENSG00000108352.7	6e-44	Epithelial
ENSG00000143546.5	6.9e-44	Epithelial
ENSG00000173156.2	7.7e-44	Epithelial
ENSG00000197279.3	7.7e-44	Epithelial
ENSG00000189280.3	3e-43	Epithelial
ENSG00000142273.6	1e-42	Epithelial
ENSG00000223572.5	1.4e-42	Epithelial
ENSG00000164078.8	6.2e-42	Epithelial
ENSG00000204839.4	1.4e-41	Epithelial
ENSG00000182795.12	2.3e-41	Epithelial
ENSG00000164142.11	2.5e-41	Epithelial
ENSG00000185033.10	2.8e-41	Epithelial
ENSG00000023892.9	3.5e-41	Epithelial
ENSG00000163993.6	5.3e-41	Epithelial
ENSG00000167656.4	5.6e-41	Epithelial
ENSG00000105523.3	1.4e-40	Epithelial
ENSG00000064270.8	1.6e-40	Epithelial
ENSG00000167741.6	1.7e-40	Epithelial
ENSG00000138271.4	2.2e-40	Epithelial
ENSG00000092929.7	2.5e-40	Epithelial
ENSG00000214860.4	3.4e-40	Epithelial
ENSG00000130701.3	3.8e-40	Epithelial
ENSG00000148346.7	6e-40	Epithelial
ENSG00000109667.7	8.4e-40	Epithelial
ENSG00000223573.2	9.4e-40	Epithelial
ENSG00000135525.14	9.5e-40	Epithelial
ENSG00000181885.14	1.4e-39	Epithelial
ENSG00000262943.3	1.5e-39	Epithelial
ENSG00000163218.10	4.8e-39	Epithelial
ENSG00000179913.6	5.6e-39	Epithelial
ENSG00000169509.5	6.1e-39	Epithelial
ENSG00000106789.8	9e-39	Epithelial
ENSG00000131746.8	9.4e-39	Epithelial
ENSG00000218416.3	1.3e-38	Epithelial
ENSG00000163216.6	1.4e-38	Epithelial
ENSG00000163209.10	2.5e-38	Epithelial
ENSG00000186847.5	1.1e-37	Epithelial
ENSG00000163472.14	1.4e-37	Epithelial
ENSG00000087128.5	1.6e-37	Epithelial
ENSG00000165474.5	1.9e-37	Epithelial
ENSG00000088002.7	2.7e-37	Epithelial
ENSG00000136688.6	2.7e-37	Epithelial
ENSG00000131037.10	2.8e-37	Epithelial
ENSG00000136002.12	3.7e-37	Epithelial
ENSG00000178038.12	5.7e-37	Epithelial
ENSG00000087916.7	8.1e-37	Epithelial
ENSG00000137699.12	1.3e-36	Epithelial
ENSG00000008323.11	2.1e-36	Epithelial
ENSG00000125775.10	2.3e-36	Epithelial
ENSG00000165799.4	4.3e-36	Epithelial
ENSG00000164181.9	5.8e-36	Epithelial
ENSG00000165272.10	9.1e-36	Epithelial
ENSG00000178934.4	1.3e-35	Epithelial
ENSG00000134760.5	1.4e-35	Epithelial
ENSG00000227184.3	1.4e-35	Epithelial
ENSG00000058085.10	1.6e-35	Epithelial
ENSG00000103067.7	2.1e-35	Epithelial
ENSG00000158055.11	4.4e-35	Epithelial
ENSG00000117394.15	6.1e-35	Epithelial
ENSG00000127824.9	6.5e-35	Epithelial
ENSG00000213022.4	7.3e-35	Epithelial
ENSG00000169474.3	1.5e-34	Epithelial
ENSG00000189433.5	2.6e-34	Epithelial
ENSG00000205426.6	4.7e-34	Epithelial
ENSG00000154227.9	5.4e-34	Epithelial
ENSG00000197070.9	5.4e-34	Epithelial
ENSG00000197641.7	5.4e-34	Epithelial
ENSG00000185479.5	7.2e-34	Epithelial
ENSG00000140832.5	7.5e-34	Epithelial
ENSG00000091622.11	1.1e-33	Epithelial
ENSG00000153292.11	1.3e-33	Epithelial
ENSG00000175121.7	1.3e-33	Epithelial
ENSG00000203499.6	1.3e-33	Epithelial
ENSG00000155918.3	1.5e-33	Epithelial
ENSG00000116661.9	3.1e-33	Epithelial
ENSG00000261116.1	5.7e-33	Epithelial
ENSG00000109321.6	7.5e-33	Epithelial
ENSG00000115884.6	1.4e-32	Epithelial
ENSG00000214711.5	2e-32	Epithelial
ENSG00000226145.3	2e-32	Epithelial
ENSG00000087494.11	2.1e-32	Epithelial
ENSG00000124107.5	2.6e-32	Epithelial
ENSG00000117407.12	2.9e-32	Epithelial
ENSG00000016602.8	3.2e-32	Epithelial
ENSG00000269741.1	3.2e-32	Epithelial
ENSG00000183696.9	1.5e-31	Epithelial
ENSG00000169035.7	1.6e-31	Epithelial
ENSG00000261521.1	3.2e-31	Epithelial
ENSG00000170423.8	4.4e-31	Epithelial
ENSG00000133710.11	5.2e-31	Epithelial
ENSG00000171401.10	5.7e-31	Epithelial
ENSG00000181392.10	7.2e-31	Epithelial
ENSG00000196189.8	7.7e-31	Epithelial
ENSG00000197822.6	1.1e-30	Epithelial
ENSG00000142675.13	1.2e-30	Epithelial
ENSG00000174827.9	1.3e-30	Epithelial
ENSG00000120756.8	1.5e-30	Epithelial
ENSG00000204539.3	1.8e-30	Epithelial
ENSG00000136059.10	1.9e-30	Epithelial
ENSG00000168143.8	3.1e-30	Epithelial
ENSG00000105699.12	3.2e-30	Epithelial
ENSG00000133808.4	3.9e-30	Epithelial
ENSG00000226887.3	4.2e-30	Epithelial
ENSG00000203785.4	4.4e-30	Epithelial
ENSG00000167755.9	7e-30	Epithelial
ENSG00000124664.6	8.4e-30	Epithelial
ENSG00000230439.2	1.4e-29	Epithelial
ENSG00000049283.13	1.5e-29	Epithelial
ENSG00000120457.7	1.9e-29	Epithelial
ENSG00000152939.10	2e-29	Epithelial
ENSG00000105388.10	2.5e-29	Epithelial
ENSG00000167754.8	2.7e-29	Epithelial
ENSG00000144045.9	3.3e-29	Epithelial
ENSG00000163406.6	3.4e-29	Epithelial
ENSG00000095203.10	4.8e-29	Epithelial
ENSG00000233493.3	4.8e-29	Epithelial
ENSG00000099812.6	5.1e-29	Epithelial
ENSG00000186474.11	5.6e-29	Epithelial
ENSG00000141579.6	6.1e-29	Epithelial
ENSG00000117595.6	6.5e-29	Epithelial
ENSG00000180921.6	1.1e-28	Epithelial
ENSG00000167916.4	1.9e-28	Epithelial
ENSG00000215115.5	1.9e-28	Epithelial
ENSG00000198142.3	2e-28	Epithelial
ENSG00000135423.8	2.9e-28	Epithelial
ENSG00000171346.9	3.2e-28	Epithelial
ENSG00000178363.3	5e-28	Epithelial
ENSG00000143674.6	6.3e-28	Epithelial
ENSG00000065621.10	7.7e-28	Epithelial
ENSG00000073282.8	9.2e-28	Epithelial
ENSG00000157992.8	9.8e-28	Epithelial
ENSG00000165390.11	9.9e-28	Epithelial
ENSG00000204580.7	1.1e-27	Epithelial
ENSG00000127249.10	1.2e-27	Epithelial
ENSG00000167642.8	1.4e-27	Epithelial
ENSG00000142235.4	1.5e-27	Epithelial
ENSG00000186212.2	1.8e-27	Epithelial
ENSG00000125637.11	2.3e-27	Epithelial
ENSG00000188508.6	2.3e-27	Epithelial
ENSG00000162069.10	2.4e-27	Epithelial
ENSG00000115616.2	3.2e-27	Epithelial
ENSG00000119888.6	3.2e-27	Epithelial
ENSG00000188100.8	3.3e-27	Epithelial
ENSG00000164855.11	4.9e-27	Epithelial
ENSG00000147804.5	6e-27	Epithelial
ENSG00000136943.6	6.2e-27	Epithelial
ENSG00000117480.11	6.7e-27	Epithelial
ENSG00000154764.5	7.9e-27	Epithelial
ENSG00000165548.6	1.1e-26	Epithelial
ENSG00000189377.4	1.3e-26	Epithelial
ENSG00000140254.8	1.4e-26	Epithelial
ENSG00000129451.7	1.7e-26	Epithelial
ENSG00000132359.9	2.8e-26	Epithelial
ENSG00000179593.11	3.6e-26	Epithelial
ENSG00000164086.8	4.4e-26	Epithelial
ENSG00000104419.10	5.4e-26	Epithelial
ENSG00000166145.10	6.9e-26	Epithelial
ENSG00000085552.12	1.1e-25	Epithelial
ENSG00000086570.8	1.5e-25	Epithelial
ENSG00000174564.8	1.7e-25	Epithelial
ENSG00000256812.1	2e-25	Epithelial
ENSG00000132164.5	2.2e-25	Epithelial
ENSG00000237330.2	2.2e-25	Epithelial
ENSG00000188373.4	3.1e-25	Epithelial
ENSG00000253315.1	3.1e-25	Epithelial
ENSG00000064547.9	5.5e-25	Epithelial
ENSG00000134755.10	5.9e-25	Epithelial
ENSG00000262160.1	5.9e-25	Epithelial
ENSG00000188372.10	7.1e-25	Epithelial
ENSG00000133477.12	1.1e-24	Epithelial
ENSG00000115112.7	1.4e-24	Epithelial
ENSG00000177614.5	1.4e-24	Epithelial
ENSG00000135373.8	1.6e-24	Epithelial
ENSG00000167306.14	1.6e-24	Epithelial
ENSG00000116701.10	1.8e-24	Epithelial
ENSG00000119411.10	2e-24	Epithelial
ENSG00000136155.12	2e-24	Epithelial
ENSG00000153802.7	2.8e-24	Epithelial
ENSG00000075673.7	2.9e-24	Epithelial
ENSG00000176153.10	3.4e-24	Epithelial
ENSG00000108244.12	3.5e-24	Epithelial
ENSG00000005001.5	7.9e-24	Epithelial
ENSG00000121900.14	8e-24	Epithelial
ENSG00000143367.11	9.5e-24	Epithelial
ENSG00000095585.12	1e-23	Epithelial
ENSG00000132470.9	1e-23	Epithelial
ENSG00000203306.3	1.2e-23	Epithelial
ENSG00000204618.4	1.4e-23	Epithelial
ENSG00000198092.5	3.9e-23	Epithelial
ENSG00000232040.2	4.2e-23	Epithelial
ENSG00000121552.3	4.5e-23	Epithelial
ENSG00000162522.6	5e-23	Epithelial
ENSG00000070526.10	6.1e-23	Epithelial
ENSG00000180287.12	6.1e-23	Epithelial
ENSG00000136695.10	6.5e-23	Epithelial
ENSG00000178372.6	9e-23	Epithelial
ENSG00000117676.9	1.1e-22	Epithelial
ENSG00000161642.13	1.1e-22	Epithelial
ENSG00000184731.5	1.1e-22	Epithelial
ENSG00000214530.3	1.2e-22	Epithelial
ENSG00000101311.11	1.3e-22	Epithelial
ENSG00000170426.1	1.3e-22	Epithelial
ENSG00000089356.12	1.5e-22	Epithelial
ENSG00000179148.5	1.6e-22	Epithelial
ENSG00000134709.6	1.8e-22	Epithelial
ENSG00000153294.7	1.9e-22	Epithelial
ENSG00000137843.7	2e-22	Epithelial
ENSG00000057149.10	2.1e-22	Epithelial
ENSG00000050327.10	2.3e-22	Epithelial
ENSG00000170477.8	2.5e-22	Epithelial
ENSG00000142973.8	2.7e-22	Epithelial
ENSG00000139044.6	3.3e-22	Epithelial
ENSG00000143536.7	3.3e-22	Epithelial
ENSG00000213906.5	3.8e-22	Epithelial
ENSG00000159527.3	4.3e-22	Epithelial
ENSG00000134955.7	4.5e-22	Epithelial
ENSG00000164825.3	5e-22	Epithelial
ENSG00000170044.4	5e-22	Epithelial
ENSG00000143590.9	6.7e-22	Epithelial
ENSG00000182040.4	7.2e-22	Epithelial
ENSG00000205076.4	9.4e-22	Epithelial
ENSG00000142623.8	1.1e-21	Epithelial
ENSG00000111319.8	1.6e-21	Epithelial
ENSG00000243708.4	1.7e-21	Epithelial
ENSG00000171462.10	1.8e-21	Epithelial
ENSG00000121207.7	2.1e-21	Epithelial
ENSG00000241484.5	2.1e-21	Epithelial
ENSG00000130762.10	2.2e-21	Epithelial
ENSG00000247844.1	2.2e-21	Epithelial
ENSG00000108242.8	2.5e-21	Epithelial
ENSG00000113645.9	3e-21	Epithelial
ENSG00000158125.5	3.3e-21	Epithelial
ENSG00000151715.3	4.4e-21	Epithelial
ENSG00000142178.7	6.5e-21	Epithelial
ENSG00000142765.13	7.9e-21	Epithelial
ENSG00000129354.7	9e-21	Epithelial
ENSG00000105048.12	9.4e-21	Epithelial
ENSG00000110944.4	9.5e-21	Epithelial
ENSG00000204385.6	1.1e-20	Epithelial
ENSG00000136352.13	1.2e-20	Epithelial
ENSG00000165591.6	1.2e-20	Epithelial
ENSG00000168032.4	1.7e-20	Epithelial
ENSG00000129514.4	2e-20	Epithelial
ENSG00000137857.13	2.2e-20	Epithelial
ENSG00000225950.3	2.5e-20	Epithelial
ENSG00000100985.7	3e-20	Epithelial
ENSG00000187193.8	3e-20	Epithelial
ENSG00000127152.13	3.6e-20	Epithelial
ENSG00000174292.8	3.6e-20	Epithelial
ENSG00000147676.9	3.8e-20	Epithelial
ENSG00000189143.8	3.8e-20	Epithelial
ENSG00000229544.6	4.3e-20	Epithelial
ENSG00000124171.4	4.7e-20	Epithelial
ENSG00000125731.8	5.5e-20	Epithelial
ENSG00000261183.1	5.6e-20	Epithelial
ENSG00000124102.4	5.8e-20	Epithelial
ENSG00000148426.8	5.8e-20	Epithelial
ENSG00000198088.6	1.2e-19	Epithelial
ENSG00000167207.7	1.3e-19	Epithelial
ENSG00000186807.9	1.5e-19	Epithelial
ENSG00000187583.6	1.7e-19	Epithelial
ENSG00000136689.14	1.8e-19	Epithelial
ENSG00000135127.7	1.9e-19	Epithelial
ENSG00000163435.11	2.1e-19	Epithelial
ENSG00000113946.3	2.2e-19	Epithelial
ENSG00000096696.9	2.3e-19	Epithelial
ENSG00000213412.3	2.3e-19	Epithelial
ENSG00000147394.14	3.5e-19	Epithelial
ENSG00000197191.3	3.5e-19	Epithelial
ENSG00000185436.7	3.6e-19	Epithelial
ENSG00000100290.2	4.3e-19	Epithelial
ENSG00000143375.10	4.3e-19	Epithelial
ENSG00000134762.12	4.6e-19	Epithelial
ENSG00000169435.9	4.8e-19	Epithelial
ENSG00000175315.2	4.8e-19	Epithelial
ENSG00000158023.5	4.9e-19	Epithelial
ENSG00000179178.6	5.9e-19	Epithelial
ENSG00000131187.5	6.2e-19	Epithelial
ENSG00000164542.8	7.8e-19	Epithelial
ENSG00000162896.5	9.2e-19	Epithelial
ENSG00000189410.7	9.8e-19	Epithelial
ENSG00000052344.11	1.1e-18	Epithelial
ENSG00000154914.12	1.2e-18	Epithelial
ENSG00000124225.11	1.3e-18	Epithelial
ENSG00000204228.3	1.6e-18	Epithelial
ENSG00000133134.7	2.3e-18	Epithelial
ENSG00000163207.5	2.3e-18	Epithelial
ENSG00000213214.3	2.6e-18	Epithelial
ENSG00000006453.9	4.5e-18	Epithelial
ENSG00000184292.5	4.5e-18	Epithelial
ENSG00000135378.3	4.7e-18	Epithelial
ENSG00000178919.7	4.7e-18	Epithelial
ENSG00000162777.12	4.8e-18	Epithelial
ENSG00000167757.9	5.9e-18	Epithelial
ENSG00000126233.1	6e-18	Epithelial
ENSG00000176945.12	6e-18	Epithelial
ENSG00000168528.7	6.6e-18	Epithelial
ENSG00000047365.7	7.7e-18	Epithelial
ENSG00000233836.3	8.5e-18	Epithelial
ENSG00000161921.10	1e-17	Epithelial
ENSG00000171345.9	1e-17	Epithelial
ENSG00000170786.8	1.3e-17	Epithelial
ENSG00000099849.10	1.4e-17	Epithelial
ENSG00000175147.7	1.4e-17	Epithelial
ENSG00000204789.3	1.4e-17	Epithelial
ENSG00000156711.12	1.8e-17	Epithelial
ENSG00000261068.1	1.9e-17	Epithelial
ENSG00000070159.9	2.5e-17	Epithelial
ENSG00000142619.4	2.5e-17	Epithelial
ENSG00000260899.1	2.7e-17	Epithelial
ENSG00000182866.12	3e-17	Epithelial
ENSG00000149527.13	4.2e-17	Epithelial
ENSG00000169550.8	4.4e-17	Epithelial
ENSG00000103044.6	5.7e-17	Epithelial
ENSG00000065675.10	6.3e-17	Epithelial
ENSG00000167183.2	7.3e-17	Epithelial
ENSG00000129521.9	8.4e-17	Epithelial
ENSG00000198780.7	9.8e-17	Epithelial
ENSG00000006432.11	1e-16	Epithelial
ENSG00000273045.1	1e-16	Epithelial
ENSG00000117115.8	1.1e-16	Epithelial
ENSG00000163362.6	1.1e-16	Epithelial
ENSG00000143126.7	1.3e-16	Epithelial
ENSG00000177494.5	1.4e-16	Epithelial
ENSG00000259328.1	1.4e-16	Epithelial
ENSG00000104327.3	1.5e-16	Epithelial
ENSG00000130294.10	1.5e-16	Epithelial
ENSG00000243789.6	1.5e-16	Epithelial
ENSG00000105357.11	1.7e-16	Epithelial
ENSG00000100558.4	1.8e-16	Epithelial
ENSG00000103942.8	1.9e-16	Epithelial
ENSG00000161958.6	2e-16	Epithelial
ENSG00000233006.2	2.2e-16	Epithelial
ENSG00000163694.10	2.4e-16	Epithelial
ENSG00000177106.10	2.6e-16	Epithelial
ENSG00000088386.11	3.5e-16	Epithelial
ENSG00000179862.5	3.5e-16	Epithelial
ENSG00000046604.8	3.6e-16	Epithelial
ENSG00000117525.9	3.6e-16	Epithelial
ENSG00000186007.5	3.7e-16	Epithelial
ENSG00000166689.10	3.8e-16	Epithelial
ENSG00000197921.5	4.6e-16	Epithelial
ENSG00000105289.10	5.7e-16	Epithelial
ENSG00000132854.14	7.1e-16	Epithelial
ENSG00000167165.14	8.2e-16	Epithelial
ENSG00000145879.6	8.4e-16	Epithelial
ENSG00000175707.7	8.4e-16	Epithelial
ENSG00000198915.7	8.6e-16	Epithelial
ENSG00000241635.3	9.8e-16	Epithelial
ENSG00000155367.11	1.1e-15	Epithelial
ENSG00000255769.3	1.6e-15	Epithelial
ENSG00000166126.6	1.7e-15	Epithelial
ENSG00000142700.7	2.1e-15	Epithelial
ENSG00000163032.7	2.2e-15	Epithelial
ENSG00000178078.7	2.2e-15	Epithelial
ENSG00000114638.3	2.5e-15	Epithelial
ENSG00000158246.7	2.7e-15	Epithelial
ENSG00000103089.4	3.1e-15	Epithelial
ENSG00000113430.5	3.3e-15	Epithelial
ENSG00000176749.4	3.3e-15	Epithelial
ENSG00000241119.1	3.3e-15	Epithelial
ENSG00000143845.10	3.4e-15	Epithelial
ENSG00000118640.6	3.5e-15	Epithelial
ENSG00000181284.2	3.5e-15	Epithelial
ENSG00000076826.5	4.1e-15	Epithelial
ENSG00000167914.6	4.6e-15	Epithelial
ENSG00000165388.8	5.1e-15	Epithelial
ENSG00000128886.7	5.2e-15	Epithelial
ENSG00000215033.3	5.7e-15	Epithelial
ENSG00000105963.9	6e-15	Epithelial
ENSG00000173805.11	6.7e-15	Epithelial
ENSG00000131941.3	8.5e-15	Epithelial
ENSG00000128604.14	8.9e-15	Epithelial
ENSG00000145103.8	9.3e-15	Epithelial
ENSG00000135220.6	1.1e-14	Epithelial
ENSG00000160588.5	1.1e-14	Epithelial
ENSG00000114270.11	1.2e-14	Epithelial
ENSG00000146700.8	1.2e-14	Epithelial
ENSG00000137975.7	1.5e-14	Epithelial
ENSG00000147144.8	1.7e-14	Epithelial
ENSG00000196337.6	1.7e-14	Epithelial
ENSG00000159166.9	1.8e-14	Epithelial
ENSG00000182107.5	1.8e-14	Epithelial
ENSG00000215845.6	1.8e-14	Epithelial
ENSG00000240563.1	1.8e-14	Epithelial
ENSG00000143001.4	2.9e-14	Epithelial
ENSG00000163235.11	2.9e-14	Epithelial
ENSG00000139988.5	3.8e-14	Epithelial
ENSG00000259472.1	3.8e-14	Epithelial
ENSG00000110723.7	4e-14	Epithelial
ENSG00000116141.11	4.1e-14	Epithelial
ENSG00000116990.9	4.1e-14	Epithelial
ENSG00000163082.9	4.6e-14	Epithelial
ENSG00000114529.8	4.8e-14	Epithelial
ENSG00000158315.6	5.4e-14	Epithelial
ENSG00000104267.5	5.9e-14	Epithelial
ENSG00000167244.13	5.9e-14	Epithelial
ENSG00000085831.11	6.1e-14	Epithelial
ENSG00000155974.7	7.1e-14	Epithelial
ENSG00000165959.7	7.1e-14	Epithelial
ENSG00000115590.9	7.4e-14	Epithelial
ENSG00000248485.1	7.9e-14	Epithelial
ENSG00000167880.3	8.3e-14	Epithelial
ENSG00000001626.10	8.6e-14	Epithelial
ENSG00000095970.12	8.7e-14	Epithelial
ENSG00000104808.3	8.8e-14	Epithelial
ENSG00000172548.10	8.8e-14	Epithelial
ENSG00000198729.4	8.9e-14	Epithelial
ENSG00000162772.12	9e-14	Epithelial
ENSG00000184574.5	1e-13	Epithelial
ENSG00000244144.1	1e-13	Epithelial
ENSG00000150165.13	1.2e-13	Epithelial
ENSG00000130940.10	1.3e-13	Epithelial
ENSG00000231131.2	1.3e-13	Epithelial
ENSG00000241935.4	1.3e-13	Epithelial
ENSG00000141622.9	1.4e-13	Epithelial
ENSG00000163545.7	1.4e-13	Epithelial
ENSG00000175984.10	1.6e-13	Epithelial
ENSG00000131650.9	1.7e-13	Epithelial
ENSG00000137747.10	1.7e-13	Epithelial
ENSG00000170006.7	1.7e-13	Epithelial
ENSG00000174669.7	1.9e-13	Epithelial
ENSG00000269855.1	1.9e-13	Epithelial
ENSG00000142677.3	2e-13	Epithelial
ENSG00000182103.3	2e-13	Epithelial
ENSG00000141738.9	2.1e-13	Epithelial
ENSG00000125780.11	2.4e-13	Epithelial
ENSG00000171903.12	2.4e-13	Epithelial
ENSG00000171004.13	2.5e-13	Epithelial
ENSG00000204959.3	2.6e-13	Epithelial
ENSG00000104881.10	2.8e-13	Epithelial
ENSG00000185499.12	3e-13	Epithelial
ENSG00000075275.12	3.3e-13	Epithelial
ENSG00000134602.11	4.1e-13	Epithelial
ENSG00000184254.12	5.1e-13	Epithelial
ENSG00000132965.5	5.4e-13	Epithelial
ENSG00000101443.13	5.8e-13	Epithelial
ENSG00000203837.4	5.8e-13	Epithelial
ENSG00000107485.11	6.1e-13	Epithelial
ENSG00000126822.11	6.7e-13	Epithelial
ENSG00000073350.9	7e-13	Epithelial
ENSG00000154102.6	7.1e-13	Epithelial
ENSG00000152056.12	7.2e-13	Epithelial
ENSG00000168350.6	7.6e-13	Epithelial
ENSG00000157765.7	9.5e-13	Epithelial
ENSG00000012779.6	1e-12	Epithelial
ENSG00000203722.3	1.1e-12	Epithelial
ENSG00000133985.2	1.3e-12	Epithelial
ENSG00000137462.6	1.6e-12	Epithelial
ENSG00000186197.8	1.6e-12	Epithelial
ENSG00000115339.9	1.7e-12	Epithelial
ENSG00000127399.10	1.7e-12	Epithelial
ENSG00000165816.8	1.7e-12	Epithelial
ENSG00000166920.6	1.7e-12	Epithelial
ENSG00000223477.3	1.7e-12	Epithelial
ENSG00000237512.2	1.8e-12	Epithelial
ENSG00000134339.4	1.9e-12	Epithelial
ENSG00000137642.8	2e-12	Epithelial
ENSG00000139973.11	2e-12	Epithelial
ENSG00000164695.4	2e-12	Epithelial
ENSG00000198807.8	2e-12	Epithelial
ENSG00000272373.1	2e-12	Epithelial
ENSG00000111816.6	2.1e-12	Epithelial
ENSG00000139725.3	2.1e-12	Epithelial
ENSG00000062038.9	2.3e-12	Epithelial
ENSG00000152766.5	2.4e-12	Epithelial
ENSG00000146054.13	2.5e-12	Epithelial
ENSG00000100033.12	2.7e-12	Epithelial
ENSG00000187554.7	2.7e-12	Epithelial
ENSG00000113924.7	3e-12	Epithelial
ENSG00000237515.6	3e-12	Epithelial
ENSG00000019186.5	3.2e-12	Epithelial
ENSG00000005884.13	3.8e-12	Epithelial
ENSG00000163293.7	3.9e-12	Epithelial
ENSG00000181577.11	5e-12	Epithelial
ENSG00000103257.4	5.6e-12	Epithelial
ENSG00000187017.10	5.6e-12	Epithelial
ENSG00000226287.3	6.4e-12	Epithelial
ENSG00000137460.4	6.5e-12	Epithelial
ENSG00000249430.1	6.6e-12	Epithelial
ENSG00000169594.8	6.8e-12	Epithelial
ENSG00000111907.16	6.9e-12	Epithelial
ENSG00000167105.3	8e-12	Epithelial
ENSG00000134716.5	8.2e-12	Epithelial
ENSG00000111679.12	8.3e-12	Epithelial
ENSG00000104413.11	8.6e-12	Epithelial
ENSG00000160207.4	8.8e-12	Epithelial
ENSG00000126460.6	9.4e-12	Epithelial
ENSG00000117016.5	1e-11	Epithelial
ENSG00000139626.11	1.1e-11	Epithelial
ENSG00000123836.10	1.2e-11	Epithelial
ENSG00000224769.1	1.2e-11	Epithelial
ENSG00000146530.7	1.3e-11	Epithelial
ENSG00000167767.9	1.3e-11	Epithelial
ENSG00000115008.5	1.4e-11	Epithelial
ENSG00000141293.11	1.4e-11	Epithelial
ENSG00000235098.4	1.4e-11	Epithelial
ENSG00000184860.5	1.6e-11	Epithelial
ENSG00000259153.1	1.8e-11	Epithelial
ENSG00000143036.12	2e-11	Epithelial
ENSG00000124143.6	2.3e-11	Epithelial
ENSG00000260088.1	2.4e-11	Epithelial
ENSG00000140839.7	2.5e-11	Epithelial
ENSG00000164520.7	2.5e-11	Epithelial
ENSG00000132821.7	2.6e-11	Epithelial
ENSG00000130475.10	3e-11	Epithelial
ENSG00000157551.13	3.4e-11	Epithelial
ENSG00000113249.8	3.5e-11	Epithelial
ENSG00000129270.11	3.8e-11	Epithelial
ENSG00000224689.3	4.3e-11	Epithelial
ENSG00000167644.7	5.6e-11	Epithelial
ENSG00000198417.5	6e-11	Epithelial
ENSG00000007062.7	6.5e-11	Epithelial
ENSG00000161249.16	6.7e-11	Epithelial
ENSG00000166592.7	8.2e-11	Epithelial
ENSG00000184697.6	8.3e-11	Epithelial
ENSG00000150782.7	8.6e-11	Epithelial
ENSG00000246082.2	8.6e-11	Epithelial
ENSG00000181126.9	8.8e-11	Epithelial
ENSG00000259796.1	9.1e-11	Epithelial
ENSG00000188112.4	9.5e-11	Epithelial
ENSG00000178947.8	9.7e-11	Epithelial
ENSG00000179059.5	9.9e-11	Epithelial
ENSG00000095587.8	1.2e-10	Epithelial
ENSG00000254951.3	1.3e-10	Epithelial
ENSG00000115009.7	1.4e-10	Epithelial
ENSG00000229647.1	1.5e-10	Epithelial
ENSG00000273415.1	1.7e-10	Epithelial
ENSG00000040608.9	1.8e-10	Epithelial
ENSG00000069188.12	1.9e-10	Epithelial
ENSG00000232774.3	1.9e-10	Epithelial
ENSG00000118242.11	2e-10	Epithelial
ENSG00000182782.7	2e-10	Epithelial
ENSG00000221947.3	2.1e-10	Epithelial
ENSG00000169174.9	2.2e-10	Epithelial
ENSG00000197991.10	2.5e-10	Epithelial
ENSG00000122861.11	2.7e-10	Epithelial
ENSG00000156463.13	2.7e-10	Epithelial
ENSG00000198643.2	2.7e-10	Epithelial
ENSG00000105519.8	2.9e-10	Epithelial
ENSG00000251381.2	3e-10	Epithelial
ENSG00000243232.3	3.1e-10	Epithelial
ENSG00000196581.6	3.2e-10	Epithelial
ENSG00000227403.1	3.5e-10	Epithelial
ENSG00000067606.11	3.9e-10	Epithelial
ENSG00000170454.5	3.9e-10	Epithelial
ENSG00000176406.16	3.9e-10	Epithelial
ENSG00000109255.7	4.1e-10	Epithelial
ENSG00000206073.6	4.1e-10	Epithelial
ENSG00000125798.10	4.2e-10	Epithelial
ENSG00000178826.6	4.4e-10	Epithelial
ENSG00000151364.11	4.7e-10	Epithelial
ENSG00000181333.11	5.3e-10	Epithelial
ENSG00000182057.4	6.8e-10	Epithelial
ENSG00000162981.12	7e-10	Epithelial
ENSG00000173432.6	7.3e-10	Epithelial
ENSG00000170837.2	7.6e-10	Epithelial
ENSG00000108375.8	8.1e-10	Epithelial
ENSG00000152463.10	8.8e-10	Epithelial
ENSG00000112559.9	1.1e-09	Epithelial
ENSG00000156510.11	1.2e-09	Epithelial
ENSG00000138772.8	1.7e-09	Epithelial
ENSG00000152669.8	1.8e-09	Epithelial
ENSG00000137142.4	1.9e-09	Epithelial
ENSG00000169583.12	1.9e-09	Epithelial
ENSG00000184564.8	1.9e-09	Epithelial
ENSG00000170421.7	2.2e-09	Epithelial
ENSG00000188505.4	2.4e-09	Epithelial
ENSG00000143850.8	2.5e-09	Epithelial
ENSG00000162552.10	2.5e-09	Epithelial
ENSG00000255398.2	2.5e-09	Epithelial
ENSG00000165215.5	2.6e-09	Epithelial
ENSG00000158050.4	2.7e-09	Epithelial
ENSG00000124882.3	2.8e-09	Epithelial
ENSG00000131242.11	2.8e-09	Epithelial
ENSG00000154548.8	3e-09	Epithelial
ENSG00000182585.5	3e-09	Epithelial
ENSG00000196344.7	3.2e-09	Epithelial
ENSG00000171224.7	3.6e-09	Epithelial
ENSG00000205236.6	3.9e-09	Epithelial
ENSG00000245848.2	4.1e-09	Epithelial
ENSG00000163347.5	4.2e-09	Epithelial
ENSG00000165887.7	4.5e-09	Epithelial
ENSG00000143061.13	4.6e-09	Epithelial
ENSG00000120162.9	4.8e-09	Epithelial
ENSG00000240801.1	4.8e-09	Epithelial
ENSG00000101333.12	5e-09	Epithelial
ENSG00000023445.9	5.1e-09	Epithelial
ENSG00000184305.10	5.2e-09	Epithelial
ENSG00000197506.6	5.6e-09	Epithelial
ENSG00000204396.6	5.7e-09	Epithelial
ENSG00000131620.13	6.6e-09	Epithelial
ENSG00000176826.11	7.1e-09	Epithelial
ENSG00000147003.5	7.4e-09	Epithelial
ENSG00000145283.7	8.2e-09	Epithelial
ENSG00000168389.13	8.6e-09	Epithelial
ENSG00000196542.4	9.2e-09	Epithelial
ENSG00000205595.3	9.5e-09	Epithelial
ENSG00000102109.7	1e-08	Epithelial
ENSG00000108602.13	1e-08	Epithelial
ENSG00000118785.9	1.1e-08	Epithelial
ENSG00000169129.10	1.2e-08	Epithelial
ENSG00000146955.6	1.3e-08	Epithelial
ENSG00000187764.7	1.3e-08	Epithelial
ENSG00000188322.4	1.4e-08	Epithelial
ENSG00000130545.11	1.5e-08	Epithelial
ENSG00000173930.8	1.6e-08	Epithelial
ENSG00000259230.1	1.6e-08	Epithelial
ENSG00000104290.6	1.7e-08	Epithelial
ENSG00000179715.8	1.7e-08	Epithelial
ENSG00000164400.4	2e-08	Epithelial
ENSG00000126016.9	2.1e-08	Epithelial
ENSG00000163701.14	2.1e-08	Epithelial
ENSG00000185668.5	2.1e-08	Epithelial
ENSG00000100031.14	2.3e-08	Epithelial
ENSG00000117266.11	2.3e-08	Epithelial
ENSG00000204632.7	2.3e-08	Epithelial
ENSG00000164749.7	2.6e-08	Epithelial
ENSG00000107954.6	2.7e-08	Epithelial
ENSG00000125144.9	2.8e-08	Epithelial
ENSG00000185101.8	2.9e-08	Epithelial
ENSG00000069812.7	3e-08	Epithelial
ENSG00000159871.10	3e-08	Epithelial
ENSG00000132932.12	3.1e-08	Epithelial
ENSG00000039068.14	3.3e-08	Epithelial
ENSG00000125657.3	3.4e-08	Epithelial
ENSG00000139835.9	3.6e-08	Epithelial
ENSG00000242147.1	3.7e-08	Epithelial
ENSG00000154274.10	3.8e-08	Epithelial
ENSG00000141527.12	4e-08	Epithelial
ENSG00000016402.8	4.2e-08	Epithelial
ENSG00000135480.10	4.3e-08	Epithelial
ENSG00000123689.5	4.5e-08	Epithelial
ENSG00000130054.4	5.3e-08	Epithelial
ENSG00000205795.4	5.6e-08	Epithelial
ENSG00000123892.7	5.7e-08	Epithelial
ENSG00000182272.7	5.7e-08	Epithelial
ENSG00000165025.10	6e-08	Epithelial
ENSG00000173801.12	6.2e-08	Epithelial
ENSG00000204175.4	6.3e-08	Epithelial
ENSG00000183780.8	7.5e-08	Epithelial
ENSG00000241732.1	8e-08	Epithelial
ENSG00000130768.10	8.5e-08	Epithelial
ENSG00000077274.7	8.7e-08	Epithelial
ENSG00000170498.7	9.8e-08	Epithelial
ENSG00000175920.11	1e-07	Epithelial
ENSG00000070731.5	1.1e-07	Epithelial
ENSG00000260401.1	1.1e-07	Epithelial
ENSG00000125848.9	1.2e-07	Epithelial
ENSG00000234678.1	1.2e-07	Epithelial
ENSG00000076554.11	1.3e-07	Epithelial
ENSG00000135925.4	1.3e-07	Epithelial
ENSG00000227036.2	1.4e-07	Epithelial
ENSG00000137673.4	1.5e-07	Epithelial
ENSG00000165105.9	1.5e-07	Epithelial
ENSG00000145934.11	1.6e-07	Epithelial
ENSG00000154080.8	1.8e-07	Epithelial
ENSG00000110203.4	1.9e-07	Epithelial
ENSG00000168280.12	1.9e-07	Epithelial
ENSG00000022556.11	2e-07	Epithelial
ENSG00000184060.6	2e-07	Epithelial
ENSG00000173898.7	2.1e-07	Epithelial
ENSG00000248405.5	2.1e-07	Epithelial
ENSG00000174808.7	2.2e-07	Epithelial
ENSG00000164047.3	2.3e-07	Epithelial
ENSG00000129951.14	2.5e-07	Epithelial
ENSG00000183734.4	2.5e-07	Epithelial
ENSG00000140297.8	2.6e-07	Epithelial
ENSG00000122254.6	2.7e-07	Epithelial
ENSG00000232810.3	2.8e-07	Epithelial
ENSG00000170561.8	3.1e-07	Epithelial
ENSG00000188707.4	3.1e-07	Epithelial
ENSG00000105371.8	3.3e-07	Epithelial
ENSG00000176532.3	3.5e-07	Epithelial
ENSG00000149300.5	3.6e-07	Epithelial
ENSG00000162444.11	3.6e-07	Epithelial
ENSG00000102854.10	3.7e-07	Epithelial
ENSG00000106278.7	3.7e-07	Epithelial
ENSG00000138670.12	3.7e-07	Epithelial
ENSG00000149328.10	3.7e-07	Epithelial
ENSG00000111405.4	3.8e-07	Epithelial
ENSG00000163121.5	3.8e-07	Epithelial
ENSG00000136167.9	4.4e-07	Epithelial
ENSG00000145040.3	5.6e-07	Epithelial
ENSG00000267296.2	5.7e-07	Epithelial
ENSG00000099284.9	5.8e-07	Epithelial
ENSG00000110195.7	6e-07	Epithelial
ENSG00000206557.5	6.1e-07	Epithelial
ENSG00000261488.1	6.1e-07	Epithelial
ENSG00000162723.5	6.4e-07	Epithelial
ENSG00000261115.1	6.7e-07	Epithelial
ENSG00000162738.5	6.8e-07	Epithelial
ENSG00000177459.6	6.8e-07	Epithelial
ENSG00000168743.8	7.7e-07	Epithelial
ENSG00000197444.5	7.8e-07	Epithelial
ENSG00000179299.12	8.2e-07	Epithelial
ENSG00000227959.1	8.2e-07	Epithelial
ENSG00000101049.10	8.9e-07	Epithelial
ENSG00000076716.7	9.9e-07	Epithelial
ENSG00000145824.8	1e-06	Epithelial
ENSG00000160867.10	1e-06	Epithelial
ENSG00000198074.5	1e-06	Epithelial
ENSG00000153822.9	1.1e-06	Epithelial
ENSG00000162366.3	1.1e-06	Epithelial
ENSG00000169860.4	1.2e-06	Epithelial
ENSG00000214491.4	1.2e-06	Epithelial
ENSG00000243896.3	1.2e-06	Epithelial
ENSG00000124134.4	1.3e-06	Epithelial
ENSG00000198719.7	1.3e-06	Epithelial
ENSG00000134873.5	1.4e-06	Epithelial
ENSG00000057294.9	1.5e-06	Epithelial
ENSG00000127129.5	1.5e-06	Epithelial
ENSG00000197565.11	1.6e-06	Epithelial
ENSG00000147614.3	1.7e-06	Epithelial
ENSG00000237943.2	1.7e-06	Epithelial
ENSG00000130829.13	1.8e-06	Epithelial
ENSG00000141449.10	1.8e-06	Epithelial
ENSG00000184012.7	1.8e-06	Epithelial
ENSG00000146038.7	2.2e-06	Epithelial
ENSG00000157335.15	2.2e-06	Epithelial
ENSG00000188064.5	2.4e-06	Epithelial
ENSG00000106526.6	2.5e-06	Epithelial
ENSG00000262973.1	2.7e-06	Epithelial
ENSG00000133135.9	2.9e-06	Epithelial
ENSG00000007038.6	3e-06	Epithelial
ENSG00000107105.10	3.1e-06	Epithelial
ENSG00000155629.10	3.3e-06	Epithelial
ENSG00000171517.5	3.3e-06	Epithelial
ENSG00000170571.7	3.4e-06	Epithelial
ENSG00000135097.2	3.5e-06	Epithelial
ENSG00000266997.2	3.5e-06	Epithelial
ENSG00000176907.3	4e-06	Epithelial
ENSG00000105427.5	4.1e-06	Epithelial
ENSG00000244693.1	4.4e-06	Epithelial
ENSG00000165929.8	4.7e-06	Epithelial
ENSG00000103460.12	5.1e-06	Epithelial
ENSG00000142530.6	5.1e-06	Epithelial
ENSG00000212724.2	5.1e-06	Epithelial
ENSG00000162105.12	5.2e-06	Epithelial
ENSG00000235947.1	5.2e-06	Epithelial
ENSG00000026559.9	5.4e-06	Epithelial
ENSG00000069482.6	5.4e-06	Epithelial
ENSG00000150054.14	5.6e-06	Epithelial
ENSG00000180739.12	5.6e-06	Epithelial
ENSG00000175591.7	6e-06	Epithelial
ENSG00000163898.5	6.4e-06	Epithelial
ENSG00000116852.10	6.5e-06	Epithelial
ENSG00000135750.10	6.9e-06	Epithelial
ENSG00000197249.8	7.2e-06	Epithelial
ENSG00000132321.12	7.4e-06	Epithelial
ENSG00000101187.11	8.1e-06	Epithelial
ENSG00000040731.6	8.2e-06	Epithelial
ENSG00000148600.10	8.8e-06	Epithelial
ENSG00000119125.12	9.3e-06	Epithelial
ENSG00000183691.4	1.1e-05	Epithelial
ENSG00000254285.2	1.1e-05	Epithelial
ENSG00000104369.4	1.2e-05	Epithelial
ENSG00000138792.5	1.2e-05	Epithelial
ENSG00000175928.5	1.2e-05	Epithelial
ENSG00000223813.2	1.3e-05	Epithelial
ENSG00000137251.11	1.4e-05	Epithelial
ENSG00000168672.3	1.6e-05	Epithelial
ENSG00000180730.4	1.6e-05	Epithelial
ENSG00000119698.7	1.9e-05	Epithelial
ENSG00000137731.9	1.9e-05	Epithelial
ENSG00000178445.8	1.9e-05	Epithelial
ENSG00000272141.1	2.1e-05	Epithelial
ENSG00000158825.5	2.4e-05	Epithelial
ENSG00000188277.8	2.4e-05	Epithelial
ENSG00000228262.4	2.5e-05	Epithelial
ENSG00000106066.9	2.6e-05	Epithelial
ENSG00000142661.14	2.7e-05	Epithelial
ENSG00000149596.6	2.7e-05	Epithelial
ENSG00000139055.2	2.8e-05	Epithelial
ENSG00000244457.2	2.9e-05	Epithelial
ENSG00000164626.8	3e-05	Epithelial
ENSG00000234685.1	3e-05	Epithelial
ENSG00000174469.13	3.1e-05	Epithelial
ENSG00000147697.4	3.4e-05	Epithelial
ENSG00000237594.2	3.4e-05	Epithelial
ENSG00000197632.4	3.6e-05	Epithelial
ENSG00000254815.1	3.6e-05	Epithelial
ENSG00000170382.7	3.7e-05	Epithelial
ENSG00000104783.7	3.8e-05	Epithelial
ENSG00000119866.16	4.4e-05	Epithelial
ENSG00000139211.5	4.5e-05	Epithelial
ENSG00000204179.6	5.1e-05	Epithelial
ENSG00000166523.3	5.6e-05	Epithelial
ENSG00000153234.9	6e-05	Epithelial
ENSG00000204860.4	7e-05	Epithelial
ENSG00000226958.1	7e-05	Epithelial
ENSG00000107742.8	7.6e-05	Epithelial
ENSG00000167080.4	7.6e-05	Epithelial
ENSG00000197181.7	7.6e-05	Epithelial
ENSG00000230259.2	8.7e-05	Epithelial
ENSG00000243081.2	9.1e-05	Epithelial
ENSG00000157322.12	1e-04	Epithelial
ENSG00000243509.4	0.00011	Epithelial
ENSG00000019505.3	0.00012	Epithelial
ENSG00000125966.8	0.00012	Epithelial
ENSG00000164690.3	0.00013	Epithelial
ENSG00000008196.8	0.00014	Epithelial
ENSG00000158457.4	0.00014	Epithelial
ENSG00000066468.16	0.00015	Epithelial
ENSG00000147573.12	0.00015	Epithelial
ENSG00000223784.1	0.00015	Epithelial
ENSG00000125618.12	0.00017	Epithelial
ENSG00000179344.12	0.00019	Epithelial
ENSG00000158089.10	2e-04	Epithelial
ENSG00000144834.8	0.00021	Epithelial
ENSG00000170412.12	0.00021	Epithelial
ENSG00000087495.12	0.00022	Epithelial
ENSG00000181449.2	0.00023	Epithelial
ENSG00000170549.3	0.00025	Epithelial
ENSG00000003137.4	0.00026	Epithelial
ENSG00000118898.11	0.00026	Epithelial
ENSG00000167600.9	0.00026	Epithelial
ENSG00000153132.8	3e-04	Epithelial
ENSG00000053438.7	0.00031	Epithelial
ENSG00000198914.2	0.00031	Epithelial
ENSG00000233639.1	0.00032	Epithelial
ENSG00000105737.5	0.00033	Epithelial
ENSG00000106078.13	0.00036	Epithelial
ENSG00000146070.12	0.00037	Epithelial
ENSG00000162711.12	0.00037	Epithelial
ENSG00000215853.3	0.00038	Epithelial
ENSG00000176887.5	0.00039	Epithelial
ENSG00000150556.12	0.00042	Epithelial
ENSG00000215914.3	0.00046	Epithelial
ENSG00000188883.4	0.00055	Epithelial
ENSG00000134548.5	0.00057	Epithelial
ENSG00000006747.10	6e-04	Epithelial
ENSG00000171476.17	6e-04	Epithelial
ENSG00000243566.2	6e-04	Epithelial
ENSG00000102934.5	0.00061	Epithelial
ENSG00000225345.3	0.00064	Epithelial
ENSG00000152779.12	0.00065	Epithelial
ENSG00000121895.7	0.00066	Epithelial
ENSG00000169436.12	0.00077	Epithelial
ENSG00000177098.4	0.00088	Epithelial
ENSG00000154153.9	0.00089	Epithelial
ENSG00000132182.7	0.00095	Epithelial
ENSG00000166589.8	0.00095	Epithelial
ENSG00000162039.10	0.00098	Epithelial
ENSG00000116985.6	0.0011	Epithelial
ENSG00000166396.8	0.0011	Epithelial
ENSG00000213801.4	0.0011	Epithelial
ENSG00000170442.7	0.0012	Epithelial
ENSG00000172005.6	0.0012	Epithelial
ENSG00000262745.1	0.0012	Epithelial
ENSG00000085563.10	0.0013	Epithelial
ENSG00000145107.11	0.0013	Epithelial
ENSG00000120659.10	0.0014	Epithelial
ENSG00000170689.8	0.0015	Epithelial
ENSG00000144648.10	0.0016	Epithelial
ENSG00000225932.3	0.002	Epithelial
ENSG00000183421.7	0.0022	Epithelial
ENSG00000231107.1	0.0026	Epithelial
ENSG00000056291.13	0.0028	Epithelial
ENSG00000089250.14	0.003	Epithelial
ENSG00000103569.5	0.003	Epithelial
ENSG00000115468.7	0.003	Epithelial
ENSG00000139144.5	0.0031	Epithelial
ENSG00000104059.4	0.0033	Epithelial
ENSG00000231574.1	0.0033	Epithelial
ENSG00000238266.1	0.0034	Epithelial
ENSG00000204334.7	0.0038	Epithelial
ENSG00000018236.10	0.0039	Epithelial
ENSG00000256178.1	0.004	Epithelial
ENSG00000272763.1	0.0053	Epithelial
ENSG00000244649.2	0.0057	Epithelial
ENSG00000171303.5	0.0059	Epithelial
ENSG00000124429.13	0.0062	Epithelial
ENSG00000197406.6	0.0062	Epithelial
ENSG00000174607.6	0.0063	Epithelial
ENSG00000134827.3	0.0067	Epithelial
ENSG00000108342.8	0.0075	Epithelial
ENSG00000137726.11	0.0083	Epithelial
ENSG00000100557.5	0.0086	Epithelial
ENSG00000125538.7	0.0087	Epithelial
ENSG00000136944.13	0.0087	Epithelial
ENSG00000165376.6	0.0091	Epithelial
ENSG00000107159.8	0.0096	Epithelial
ENSG00000162873.10	0.0096	Epithelial
ENSG00000185664.10	3.7e-214	Melanocyte
ENSG00000187140.4	1e-207	Melanocyte
ENSG00000258657.1	2.1e-173	Melanocyte
ENSG00000100146.12	1.8e-170	Melanocyte
ENSG00000254416.1	2.5e-165	Melanocyte
ENSG00000147588.6	5.3e-157	Melanocyte
ENSG00000226869.2	4.1e-146	Melanocyte
ENSG00000092529.18	1.1e-138	Melanocyte
ENSG00000161091.8	5e-128	Melanocyte
ENSG00000144847.8	6.3e-119	Melanocyte
ENSG00000225768.1	4.1e-103	Melanocyte
ENSG00000080166.11	3.1e-96	Melanocyte
ENSG00000077498.8	6.6e-91	Melanocyte
ENSG00000230798.1	5.6e-90	Melanocyte
ENSG00000069424.10	7.9e-87	Melanocyte
ENSG00000145979.13	8.1e-84	Melanocyte
ENSG00000176177.9	9e-83	Melanocyte
ENSG00000164175.10	1.8e-82	Melanocyte
ENSG00000188467.6	4.1e-79	Melanocyte
ENSG00000118298.6	2.2e-73	Melanocyte
ENSG00000069974.11	5.3e-69	Melanocyte
ENSG00000120215.5	5.6e-67	Melanocyte
ENSG00000107165.8	2.6e-64	Melanocyte
ENSG00000232803.1	3.6e-64	Melanocyte
ENSG00000162341.11	2.4e-62	Melanocyte
ENSG00000105679.4	8.4e-61	Melanocyte
ENSG00000262223.2	8.5e-60	Melanocyte
ENSG00000081087.10	2.3e-56	Melanocyte
ENSG00000233610.1	4.3e-55	Melanocyte
ENSG00000100099.16	1e-54	Melanocyte
ENSG00000134160.9	2.2e-54	Melanocyte
ENSG00000126856.9	3.1e-54	Melanocyte
ENSG00000023839.6	4.3e-53	Melanocyte
ENSG00000064961.14	2.6e-50	Melanocyte
ENSG00000166682.6	4.2e-47	Melanocyte
ENSG00000039319.12	2.5e-45	Melanocyte
ENSG00000128253.9	2.4e-44	Melanocyte
ENSG00000146409.6	6e-44	Melanocyte
ENSG00000187164.13	9.3e-44	Melanocyte
ENSG00000115902.6	2e-42	Melanocyte
ENSG00000234323.1	2.7e-42	Melanocyte
ENSG00000140009.14	9e-42	Melanocyte
ENSG00000115828.11	3.4e-41	Melanocyte
ENSG00000115825.5	9.1e-40	Melanocyte
ENSG00000182612.6	3.7e-39	Melanocyte
ENSG00000196208.9	2.1e-38	Melanocyte
ENSG00000132185.12	2e-37	Melanocyte
ENSG00000104044.11	5.9e-37	Melanocyte
ENSG00000241404.2	1.1e-36	Melanocyte
ENSG00000160307.5	4.5e-36	Melanocyte
ENSG00000077585.9	5.7e-35	Melanocyte
ENSG00000187098.10	9.7e-35	Melanocyte
ENSG00000123374.6	2.3e-34	Melanocyte
ENSG00000042781.8	4.7e-34	Melanocyte
ENSG00000185634.7	8.4e-34	Melanocyte
ENSG00000132692.14	4.9e-33	Melanocyte
ENSG00000253490.1	4.9e-33	Melanocyte
ENSG00000170915.8	1.9e-32	Melanocyte
ENSG00000167889.8	4.9e-31	Melanocyte
ENSG00000108932.7	8e-31	Melanocyte
ENSG00000147439.7	3.1e-30	Melanocyte
ENSG00000081913.9	1.4e-29	Melanocyte
ENSG00000123560.9	2.6e-29	Melanocyte
ENSG00000154608.9	4.4e-28	Melanocyte
ENSG00000164434.7	6.5e-28	Melanocyte
ENSG00000006607.9	9e-28	Melanocyte
ENSG00000004866.14	1.5e-27	Melanocyte
ENSG00000163328.9	5.7e-27	Melanocyte
ENSG00000154359.8	2.4e-26	Melanocyte
ENSG00000248905.4	2.9e-26	Melanocyte
ENSG00000141540.6	4.7e-26	Melanocyte
ENSG00000183674.7	9.1e-26	Melanocyte
ENSG00000004846.12	1.8e-25	Melanocyte
ENSG00000196116.6	1.9e-25	Melanocyte
ENSG00000152207.3	6.6e-25	Melanocyte
ENSG00000183150.3	6.7e-25	Melanocyte
ENSG00000076641.4	9e-25	Melanocyte
ENSG00000052126.10	1.8e-24	Melanocyte
ENSG00000117479.8	2.7e-24	Melanocyte
ENSG00000143669.9	3.7e-24	Melanocyte
ENSG00000083544.9	6.3e-24	Melanocyte
ENSG00000214776.5	3.2e-23	Melanocyte
ENSG00000130589.12	3.5e-23	Melanocyte
ENSG00000137265.10	4.3e-23	Melanocyte
ENSG00000084710.9	5.5e-23	Melanocyte
ENSG00000061337.11	8.9e-23	Melanocyte
ENSG00000232656.3	2.6e-22	Melanocyte
ENSG00000149308.12	7e-22	Melanocyte
ENSG00000131943.13	1e-21	Melanocyte
ENSG00000182993.3	1.8e-21	Melanocyte
ENSG00000138646.4	2e-21	Melanocyte
ENSG00000125355.11	4.7e-21	Melanocyte
ENSG00000169562.9	4.7e-21	Melanocyte
ENSG00000163093.7	7.7e-21	Melanocyte
ENSG00000158022.6	7.7e-20	Melanocyte
ENSG00000249550.2	1.1e-19	Melanocyte
ENSG00000214076.3	1.3e-19	Melanocyte
ENSG00000144485.6	2.3e-19	Melanocyte
ENSG00000135838.9	2.4e-19	Melanocyte
ENSG00000259417.2	2.4e-19	Melanocyte
ENSG00000186230.6	4.1e-19	Melanocyte
ENSG00000168394.9	7.9e-19	Melanocyte
ENSG00000008735.10	9.8e-19	Melanocyte
ENSG00000110080.14	1.4e-18	Melanocyte
ENSG00000135899.12	2.8e-18	Melanocyte
ENSG00000095637.16	4.5e-18	Melanocyte
ENSG00000115267.5	6.5e-18	Melanocyte
ENSG00000154493.13	6.5e-18	Melanocyte
ENSG00000169302.10	6.5e-18	Melanocyte
ENSG00000143171.8	7.9e-18	Melanocyte
ENSG00000198133.4	1e-17	Melanocyte
ENSG00000242082.1	1.2e-17	Melanocyte
ENSG00000253200.1	1.3e-17	Melanocyte
ENSG00000204267.9	2.2e-17	Melanocyte
ENSG00000148488.11	3.5e-17	Melanocyte
ENSG00000197535.10	4.2e-17	Melanocyte
ENSG00000187608.5	5e-17	Melanocyte
ENSG00000136040.4	5.1e-17	Melanocyte
ENSG00000167291.11	5.1e-17	Melanocyte
ENSG00000258580.1	7.2e-17	Melanocyte
ENSG00000108771.8	8.4e-17	Melanocyte
ENSG00000119917.9	1.2e-16	Melanocyte
ENSG00000136514.2	3e-16	Melanocyte
ENSG00000103249.13	3.2e-16	Melanocyte
ENSG00000134326.7	4.1e-16	Melanocyte
ENSG00000183486.8	4.5e-16	Melanocyte
ENSG00000054690.9	5.4e-16	Melanocyte
ENSG00000157601.9	5.9e-16	Melanocyte
ENSG00000259828.1	1.1e-15	Melanocyte
ENSG00000261452.1	1.3e-15	Melanocyte
ENSG00000057252.8	1.8e-15	Melanocyte
ENSG00000155265.6	1.9e-15	Melanocyte
ENSG00000240809.1	2.1e-15	Melanocyte
ENSG00000171723.11	2.3e-15	Melanocyte
ENSG00000166348.13	3.8e-15	Melanocyte
ENSG00000072121.11	4.4e-15	Melanocyte
ENSG00000135114.8	4.5e-15	Melanocyte
ENSG00000261857.2	7.6e-15	Melanocyte
ENSG00000101986.8	1e-14	Melanocyte
ENSG00000168062.5	1e-14	Melanocyte
ENSG00000089127.8	1.3e-14	Melanocyte
ENSG00000114166.7	1.4e-14	Melanocyte
ENSG00000171766.11	1.7e-14	Melanocyte
ENSG00000188313.8	1.7e-14	Melanocyte
ENSG00000185745.8	2.5e-14	Melanocyte
ENSG00000198598.2	3.6e-14	Melanocyte
ENSG00000154642.6	3.9e-14	Melanocyte
ENSG00000104093.9	4.1e-14	Melanocyte
ENSG00000119922.7	5.2e-14	Melanocyte
ENSG00000126217.16	5.4e-14	Melanocyte
ENSG00000162144.5	6.1e-14	Melanocyte
ENSG00000135540.7	6.9e-14	Melanocyte
ENSG00000135929.4	7.5e-14	Melanocyte
ENSG00000118113.7	1.9e-13	Melanocyte
ENSG00000124508.12	1.9e-13	Melanocyte
ENSG00000159685.6	1.9e-13	Melanocyte
ENSG00000137628.12	2e-13	Melanocyte
ENSG00000259820.1	2.4e-13	Melanocyte
ENSG00000130775.11	2.6e-13	Melanocyte
ENSG00000225106.1	2.7e-13	Melanocyte
ENSG00000163449.6	3.1e-13	Melanocyte
ENSG00000102393.5	3.2e-13	Melanocyte
ENSG00000104763.13	3.2e-13	Melanocyte
ENSG00000189319.9	3.2e-13	Melanocyte
ENSG00000197971.10	3.5e-13	Melanocyte
ENSG00000147434.4	3.7e-13	Melanocyte
ENSG00000225931.3	4.2e-13	Melanocyte
ENSG00000163686.9	5.2e-13	Melanocyte
ENSG00000258839.2	6.2e-13	Melanocyte
ENSG00000073060.11	6.7e-13	Melanocyte
ENSG00000140379.7	1.1e-12	Melanocyte
ENSG00000260577.1	1.8e-12	Melanocyte
ENSG00000126709.10	2.2e-12	Melanocyte
ENSG00000111110.7	3.2e-12	Melanocyte
ENSG00000168481.4	4.9e-12	Melanocyte
ENSG00000182287.9	4.9e-12	Melanocyte
ENSG00000169783.8	6.2e-12	Melanocyte
ENSG00000111331.8	7.9e-12	Melanocyte
ENSG00000181409.7	9.9e-12	Melanocyte
ENSG00000272379.1	1.3e-11	Melanocyte
ENSG00000115474.6	2.3e-11	Melanocyte
ENSG00000244405.3	3e-11	Melanocyte
ENSG00000149311.13	3.6e-11	Melanocyte
ENSG00000101850.8	3.8e-11	Melanocyte
ENSG00000100167.15	4e-11	Melanocyte
ENSG00000185880.8	4e-11	Melanocyte
ENSG00000246705.3	4.4e-11	Melanocyte
ENSG00000143772.5	5e-11	Melanocyte
ENSG00000260727.1	5.1e-11	Melanocyte
ENSG00000163840.5	5.2e-11	Melanocyte
ENSG00000137449.11	8.1e-11	Melanocyte
ENSG00000205534.5	1e-10	Melanocyte
ENSG00000153485.5	1.2e-10	Melanocyte
ENSG00000165996.9	1.2e-10	Melanocyte
ENSG00000169085.7	1.9e-10	Melanocyte
ENSG00000143554.9	2.2e-10	Melanocyte
ENSG00000180318.3	2.5e-10	Melanocyte
ENSG00000136169.12	2.8e-10	Melanocyte
ENSG00000081985.6	3.1e-10	Melanocyte
ENSG00000113448.12	3.3e-10	Melanocyte
ENSG00000236819.1	4.5e-10	Melanocyte
ENSG00000118515.7	4.9e-10	Melanocyte
ENSG00000185507.15	6.7e-10	Melanocyte
ENSG00000198211.8	9.1e-10	Melanocyte
ENSG00000141424.8	9.4e-10	Melanocyte
ENSG00000140403.8	9.8e-10	Melanocyte
ENSG00000246731.2	9.8e-10	Melanocyte
ENSG00000138642.10	9.9e-10	Melanocyte
ENSG00000184979.9	1e-09	Melanocyte
ENSG00000238164.2	1.1e-09	Melanocyte
ENSG00000196083.5	1.3e-09	Melanocyte
ENSG00000171608.11	1.4e-09	Melanocyte
ENSG00000256391.1	1.5e-09	Melanocyte
ENSG00000138795.5	1.8e-09	Melanocyte
ENSG00000223414.2	1.9e-09	Melanocyte
ENSG00000105875.9	2.3e-09	Melanocyte
ENSG00000137198.5	2.3e-09	Melanocyte
ENSG00000139354.6	2.3e-09	Melanocyte
ENSG00000111335.8	2.4e-09	Melanocyte
ENSG00000214922.5	2.9e-09	Melanocyte
ENSG00000049759.12	3.4e-09	Melanocyte
ENSG00000070759.12	3.4e-09	Melanocyte
ENSG00000163564.10	3.9e-09	Melanocyte
ENSG00000164300.11	3.9e-09	Melanocyte
ENSG00000119986.6	5.1e-09	Melanocyte
ENSG00000141384.7	7.3e-09	Melanocyte
ENSG00000198477.3	8.7e-09	Melanocyte
ENSG00000152778.7	1.4e-08	Melanocyte
ENSG00000109654.10	1.7e-08	Melanocyte
ENSG00000198879.7	1.7e-08	Melanocyte
ENSG00000213062.3	1.7e-08	Melanocyte
ENSG00000124839.8	1.9e-08	Melanocyte
ENSG00000146267.11	1.9e-08	Melanocyte
ENSG00000109452.8	2.1e-08	Melanocyte
ENSG00000162729.9	2.1e-08	Melanocyte
ENSG00000172183.10	2.3e-08	Melanocyte
ENSG00000110693.11	2.7e-08	Melanocyte
ENSG00000122133.12	3.2e-08	Melanocyte
ENSG00000135116.5	3.2e-08	Melanocyte
ENSG00000007237.14	3.5e-08	Melanocyte
ENSG00000139737.17	3.8e-08	Melanocyte
ENSG00000106785.10	4.7e-08	Melanocyte
ENSG00000136999.4	5.8e-08	Melanocyte
ENSG00000204642.9	5.8e-08	Melanocyte
ENSG00000163508.8	6.2e-08	Melanocyte
ENSG00000219438.4	7e-08	Melanocyte
ENSG00000162512.11	8.9e-08	Melanocyte
ENSG00000025708.8	9.9e-08	Melanocyte
ENSG00000093217.5	1.1e-07	Melanocyte
ENSG00000113356.6	1.1e-07	Melanocyte
ENSG00000132763.10	1.1e-07	Melanocyte
ENSG00000164742.10	1.2e-07	Melanocyte
ENSG00000112276.9	1.3e-07	Melanocyte
ENSG00000005513.9	1.4e-07	Melanocyte
ENSG00000182890.3	2e-07	Melanocyte
ENSG00000048740.13	2.1e-07	Melanocyte
ENSG00000135903.14	2.1e-07	Melanocyte
ENSG00000203446.2	2.5e-07	Melanocyte
ENSG00000141404.11	2.7e-07	Melanocyte
ENSG00000140961.8	2.9e-07	Melanocyte
ENSG00000226674.4	3.3e-07	Melanocyte
ENSG00000139915.14	3.9e-07	Melanocyte
ENSG00000163126.10	3.9e-07	Melanocyte
ENSG00000056998.14	4e-07	Melanocyte
ENSG00000046653.10	4.3e-07	Melanocyte
ENSG00000170579.10	4.4e-07	Melanocyte
ENSG00000178878.8	4.6e-07	Melanocyte
ENSG00000206337.6	4.6e-07	Melanocyte
ENSG00000065361.10	5.2e-07	Melanocyte
ENSG00000123095.5	5.3e-07	Melanocyte
ENSG00000105929.11	6.2e-07	Melanocyte
ENSG00000140263.9	6.4e-07	Melanocyte
ENSG00000174130.8	9.7e-07	Melanocyte
ENSG00000115525.12	1e-06	Melanocyte
ENSG00000115041.8	1.1e-06	Melanocyte
ENSG00000139438.5	1.2e-06	Melanocyte
ENSG00000205318.3	1.2e-06	Melanocyte
ENSG00000246898.1	1.3e-06	Melanocyte
ENSG00000068079.3	1.4e-06	Melanocyte
ENSG00000080823.17	1.4e-06	Melanocyte
ENSG00000071575.7	1.5e-06	Melanocyte
ENSG00000157873.13	1.5e-06	Melanocyte
ENSG00000181381.9	1.6e-06	Melanocyte
ENSG00000137959.11	2.5e-06	Melanocyte
ENSG00000115919.10	2.7e-06	Melanocyte
ENSG00000105855.5	2.9e-06	Melanocyte
ENSG00000112137.12	2.9e-06	Melanocyte
ENSG00000120875.4	3.6e-06	Melanocyte
ENSG00000176998.3	3.6e-06	Melanocyte
ENSG00000258461.1	4.4e-06	Melanocyte
ENSG00000267504.1	4.4e-06	Melanocyte
ENSG00000064225.8	4.5e-06	Melanocyte
ENSG00000151320.6	4.6e-06	Melanocyte
ENSG00000089041.12	5.3e-06	Melanocyte
ENSG00000165801.5	5.3e-06	Melanocyte
ENSG00000102575.6	5.5e-06	Melanocyte
ENSG00000092421.12	7.2e-06	Melanocyte
ENSG00000095739.7	7.7e-06	Melanocyte
ENSG00000134121.5	7.7e-06	Melanocyte
ENSG00000212907.2	8.2e-06	Melanocyte
ENSG00000134802.13	8.7e-06	Melanocyte
ENSG00000134508.8	9.1e-06	Melanocyte
ENSG00000086300.11	9.8e-06	Melanocyte
ENSG00000134321.7	1e-05	Melanocyte
ENSG00000141576.10	1e-05	Melanocyte
ENSG00000151882.7	1.1e-05	Melanocyte
ENSG00000216802.1	1.2e-05	Melanocyte
ENSG00000100505.9	1.3e-05	Melanocyte
ENSG00000107201.5	1.3e-05	Melanocyte
ENSG00000183196.4	1.4e-05	Melanocyte
ENSG00000228203.2	1.4e-05	Melanocyte
ENSG00000163599.10	1.5e-05	Melanocyte
ENSG00000206190.7	1.5e-05	Melanocyte
ENSG00000175356.8	1.6e-05	Melanocyte
ENSG00000020633.14	1.7e-05	Melanocyte
ENSG00000137872.11	1.8e-05	Melanocyte
ENSG00000249274.1	1.8e-05	Melanocyte
ENSG00000144837.4	1.9e-05	Melanocyte
ENSG00000101115.8	2e-05	Melanocyte
ENSG00000007312.8	2.3e-05	Melanocyte
ENSG00000143469.12	2.3e-05	Melanocyte
ENSG00000258388.3	2.4e-05	Melanocyte
ENSG00000101197.8	2.8e-05	Melanocyte
ENSG00000237645.1	2.8e-05	Melanocyte
ENSG00000025039.10	3.2e-05	Melanocyte
ENSG00000158008.5	3.5e-05	Melanocyte
ENSG00000152270.4	3.6e-05	Melanocyte
ENSG00000185985.7	3.6e-05	Melanocyte
ENSG00000115648.9	3.7e-05	Melanocyte
ENSG00000169760.13	3.9e-05	Melanocyte
ENSG00000198814.8	3.9e-05	Melanocyte
ENSG00000065413.12	4.4e-05	Melanocyte
ENSG00000118322.8	4.4e-05	Melanocyte
ENSG00000151952.10	4.4e-05	Melanocyte
ENSG00000131981.11	5.7e-05	Melanocyte
ENSG00000104833.6	5.9e-05	Melanocyte
ENSG00000256390.1	6.2e-05	Melanocyte
ENSG00000188763.3	6.6e-05	Melanocyte
ENSG00000108387.10	7e-05	Melanocyte
ENSG00000159200.13	7e-05	Melanocyte
ENSG00000152078.5	7.1e-05	Melanocyte
ENSG00000171714.10	7.4e-05	Melanocyte
ENSG00000102032.8	8.2e-05	Melanocyte
ENSG00000075643.5	8.4e-05	Melanocyte
ENSG00000134243.7	8.5e-05	Melanocyte
ENSG00000132530.12	8.8e-05	Melanocyte
ENSG00000205363.4	8.8e-05	Melanocyte
ENSG00000095397.9	9.1e-05	Melanocyte
ENSG00000128285.4	1e-04	Melanocyte
ENSG00000175445.10	0.00011	Melanocyte
ENSG00000258791.3	0.00011	Melanocyte
ENSG00000106772.13	0.00013	Melanocyte
ENSG00000137965.6	0.00013	Melanocyte
ENSG00000273213.1	0.00014	Melanocyte
ENSG00000141337.8	0.00015	Melanocyte
ENSG00000111846.11	0.00016	Melanocyte
ENSG00000112149.5	0.00016	Melanocyte
ENSG00000187068.2	0.00016	Melanocyte
ENSG00000233966.1	0.00017	Melanocyte
ENSG00000171291.4	0.00019	Melanocyte
ENSG00000175827.2	0.00019	Melanocyte
ENSG00000151012.9	0.00021	Melanocyte
ENSG00000110628.9	0.00023	Melanocyte
ENSG00000177989.9	0.00023	Melanocyte
ENSG00000179388.8	0.00023	Melanocyte
ENSG00000136160.10	0.00024	Melanocyte
ENSG00000174125.3	0.00024	Melanocyte
ENSG00000159231.5	0.00025	Melanocyte
ENSG00000141639.7	0.00026	Melanocyte
ENSG00000261324.2	0.00027	Melanocyte
ENSG00000105559.7	0.00029	Melanocyte
ENSG00000122966.9	3e-04	Melanocyte
ENSG00000151025.9	3e-04	Melanocyte
ENSG00000178538.5	0.00036	Melanocyte
ENSG00000230267.3	0.00037	Melanocyte
ENSG00000259479.2	0.00038	Melanocyte
ENSG00000090661.7	0.00042	Melanocyte
ENSG00000163975.7	0.00048	Melanocyte
ENSG00000170629.10	0.00048	Melanocyte
ENSG00000108381.6	5e-04	Melanocyte
ENSG00000139832.3	0.00053	Melanocyte
ENSG00000167995.11	0.00053	Melanocyte
ENSG00000170153.6	0.00053	Melanocyte
ENSG00000114790.8	0.00055	Melanocyte
ENSG00000101680.9	0.00056	Melanocyte
ENSG00000155846.12	0.00068	Melanocyte
ENSG00000171791.10	0.00074	Melanocyte
ENSG00000235180.1	0.00082	Melanocyte
ENSG00000102878.11	0.00092	Melanocyte
ENSG00000267404.1	0.00096	Melanocyte
ENSG00000158806.9	0.0011	Melanocyte
ENSG00000188013.5	0.0011	Melanocyte
ENSG00000137203.6	0.0013	Melanocyte
ENSG00000133106.10	0.0015	Melanocyte
ENSG00000257803.2	0.0015	Melanocyte
ENSG00000104490.13	0.0016	Melanocyte
ENSG00000119946.9	0.0016	Melanocyte
ENSG00000146147.10	0.0016	Melanocyte
ENSG00000142494.9	0.0017	Melanocyte
ENSG00000171368.10	0.0017	Melanocyte
ENSG00000189058.4	0.0017	Melanocyte
ENSG00000197959.9	0.0017	Melanocyte
ENSG00000010030.9	0.0019	Melanocyte
ENSG00000162894.7	0.002	Melanocyte
ENSG00000109265.8	0.0021	Melanocyte
ENSG00000100321.10	0.0022	Melanocyte
[truncated: 872 more rows]
