# Supplementary material for: A limited set of transcriptional programs define major cell types
Source: HighWire-hosted journal article supplement (doi:10.1101/gr.263186.120), 2020-07-01
Supplement: Supplemental_table_S12.xlsx [file Supplemental_table_S12.xlsx]

## Sheet: README
Table S12: Estimated cell type enrichments using xCell for 8,527 GTEx samples, 1,963 PANCANCER samples and 53 ENCODE samples.

## Sheet: Table_S12
SAMPID	Neural	Endothelial	Epithelial	Melanocyte	Mesenchymal	Blood	Project
GTEX-111CU-1826-SM-5GZYN	465.694002130527	1216.25007752273	433.377885054634	354.545088873621	1456.00415195614	1901.95448010918	GTEX
GTEX-111FC-0226-SM-5N9B8	612.185072915723	1299.14779471787	292.281142699113	368.112062268117	1630.24101929618	1495.21173464052	GTEX
GTEX-111VG-2326-SM-5N9BK	458.688965514449	1095.13097389876	398.6546279351	377.289493641074	1480.47586754787	2097.20468971	GTEX
GTEX-111YS-2426-SM-5GZZQ	474.901974330812	1320.8417127839	462.977647117304	344.461593691699	1346.69944748647	1828.94058016434	GTEX
GTEX-1122O-2026-SM-5NQ91	514.105683632896	1308.07476575021	398.242710944949	404.939757508018	1401.41424956432	1717.23449448959	GTEX
GTEX-1128S-2126-SM-5H12U	472.900555130447	1283.37301907352	422.923526611948	377.246872867873	1362.0437515835	1891.92900521765	GTEX
GTEX-113IC-0226-SM-5HL5C	541.7496234151	1175.10446182152	327.027442450382	399.388874982427	1610.69935739033	1774.32481329277	GTEX
GTEX-117YX-2226-SM-5EGJJ	619.547495600545	1233.61850346242	423.787676126506	480.139940617018	1371.60970816182	1647.18319088944	GTEX
GTEX-11DXW-0326-SM-5H11W	629.567994262077	1289.98020161238	329.95012063192	377.111480174704	1600.62972217793	1479.58751248805	GTEX
GTEX-11DXX-2326-SM-5Q5A2	516.715731090585	1244.14937796822	403.199556677474	393.795725785753	1380.73030525905	1838.05447426466	GTEX
GTEX-11DZ1-0226-SM-5A5KF	458.953095724537	1372.13193779685	405.167670902553	342.726854691236	1390.07554796445	1884.63072358186	GTEX
GTEX-11EI6-0226-SM-5EQ64	561.543302274372	1288.82730773936	337.552580332645	374.788017057644	1553.41372958288	1656.00800600776	GTEX
GTEX-11EM3-2326-SM-5H12B	607.758487415779	1273.98057384326	479.984372677639	391.596881438015	1419.81449445851	1484.13909758647	GTEX
GTEX-11EMC-2826-SM-5PNY6	515.597293449097	1198.17991402853	483.678018004285	419.298681114256	1400.14397111924	1778.29590264597	GTEX
GTEX-11EQ8-0226-SM-5EQ5G	554.527727536492	1210.24097507923	417.409536576631	501.250914745718	1480.71020372877	1705.5953249852	GTEX
GTEX-11EQ9-2526-SM-5HL66	611.605298580973	1308.01789772302	396.113317430875	399.722337697853	1425.08065902562	1582.50469213608	GTEX
GTEX-11GS4-2626-SM-5A5LD	516.460759647102	1317.87822327127	346.642878391333	348.224832005338	1548.7916845658	1716.60907887367	GTEX
GTEX-11GSO-2326-SM-5A5LX	474.122159713854	1095.0535647348	444.13966017901	418.957296194271	1410.36030957323	2020.35721829747	GTEX
GTEX-11H98-0226-SM-5NQ89	535.234527944708	1258.72181355665	381.277106592871	388.28914646659	1433.92336857177	1796.31262520561	GTEX
GTEX-11I78-2626-SM-5Q5AI	521.203750124805	1227.44185895915	408.5188704155	347.276318042371	1461.01682243361	1801.92806258835	GTEX
GTEX-11LCK-1126-SM-5A5KC	485.542175699353	1260.48217786671	496.612423068234	347.716713963756	1473.08327068038	1718.85876622635	GTEX
GTEX-11O72-0226-SM-59869	438.015975116368	1328.50897499113	339.472820716708	344.011407849329	1441.7935009416	1953.46644743622	GTEX
GTEX-11OF3-2426-SM-5Q5AS	649.346129041673	1290.32753603012	312.470918522658	417.378573649924	1569.33433905121	1494.34852689867	GTEX
GTEX-11ONC-2526-SM-5986W	635.057974489266	1114.02065376364	388.674835790104	491.413113096194	1599.53839875941	1591.55223637371	GTEX
GTEX-11P7K-2026-SM-5GU74	628.80617170992	1351.20041503196	412.748063544872	410.53106679314	1434.25686213082	1429.94666726047	GTEX
GTEX-11P81-2426-SM-5GU65	535.966464170459	1327.73957218803	345.674134597223	382.486814282418	1481.13579714708	1716.20817119185	GTEX
GTEX-11P82-1726-SM-5Q5AT	561.574305566792	1285.09915077755	405.800622066198	415.810771226802	1442.11776955162	1641.22582954905	GTEX
GTEX-11PRG-0626-SM-5BC56	497.004709695138	1228.51693316551	407.471093576054	410.41722825543	1553.79964108574	1746.19036442075	GTEX
GTEX-11TTK-0226-SM-5N9EC	510.842684551222	1309.72623138719	343.820392796485	389.774027807779	1524.23823825678	1731.56978820221	GTEX
GTEX-11TUW-2626-SM-5EQKZ	476.209589531079	1140.78319005901	394.922672901685	384.061592464113	1507.57817310634	1925.42110081214	GTEX
GTEX-11UD1-0226-SM-5EQKL	475.245741057111	1199.63897059631	377.913495087485	443.408749505317	1537.1976082699	1853.51078607549	GTEX
GTEX-11UD2-0126-SM-5EQL2	537.923493302262	1209.59285663969	394.858667860047	408.501877748075	1559.75586650932	1672.3906849038	GTEX
GTEX-11WQC-2426-SM-5EQKQ	578.303441809377	1437.15858513202	410.921766720575	412.633747965297	1359.39643964216	1492.9576859432	GTEX
GTEX-11XUK-2126-SM-5EQLR	499.81116527447	1252.01108422631	929.95359494491	386.041071766856	1372.86293201425	1193.28126422904	GTEX
GTEX-11ZTS-0226-SM-5EQKD	499.711107870004	1286.22462258422	374.343232976696	380.020224009385	1535.28598252836	1703.97525944026	GTEX
GTEX-11ZTT-2526-SM-5EQM9	536.97974347565	1252.49895368739	442.686462598205	391.390741518843	1434.18282230672	1695.27693373927	GTEX
GTEX-11ZU8-2426-SM-5EQMV	429.743344940131	1232.45458802171	335.457530123737	379.948673118882	1459.40365075384	2022.44411809954	GTEX
GTEX-11ZUS-0726-SM-59886	592.248316360897	1276.81750679869	374.973373575798	372.782746232351	1545.58974501106	1588.76634883216	GTEX
GTEX-11ZVC-2626-SM-5FQTA	450.514043370201	1287.1648620809	355.091704624859	391.539796212555	1411.46161739699	1967.93970645312	GTEX
GTEX-1211K-2226-SM-5FQU6	551.083609818237	1236.83503520818	435.648884794172	404.58320217053	1549.60837331949	1578.21677310608	GTEX
GTEX-12126-0426-SM-5Q5AP	588.34234033201	1247.42403125531	348.852918412417	368.774668437872	1517.70310334231	1645.71041247702	GTEX
GTEX-1212Z-2426-SM-5EQ5D	568.080139412752	1190.9656590528	335.604733133883	363.149299311632	1643.47748829828	1680.60965137049	GTEX
GTEX-12584-0226-SM-5EQL5	480.53413035913	1379.43043630239	411.082273474611	367.312646973777	1370.83165900483	1780.21807975221	GTEX
GTEX-12696-2526-SM-5EQLN	611.030376640669	1261.41017150982	418.720854458235	443.420802196202	1482.32432317086	1526.91099076922	GTEX
GTEX-1269C-2726-SM-5EGJ4	604.125450111239	1347.65303854536	326.82746312762	380.701047960071	1430.64502314174	1703.96501768137	GTEX
GTEX-12C56-1626-SM-5FQUO	494.407488203743	1245.25956281967	477.601084002753	377.117704525687	1468.92482635559	1758.33808632767	GTEX
GTEX-12KS4-0426-SM-5EQMC	497.194546309945	1305.21746703441	388.620091234036	399.973657158269	1435.32170541742	1760.82606914534	GTEX
GTEX-12WSA-0326-SM-5BC6I	656.959900708324	1262.43009134812	473.834318998992	491.460285862144	1468.25170490631	1401.27404823403	GTEX
GTEX-12WSB-0226-SM-5GCOR	466.444133773542	1326.38312638797	322.774567036021	374.855944435346	1468.61382211066	1861.76900461089	GTEX
GTEX-12WSC-0226-SM-5EQ52	526.057379258654	1318.70044413112	367.423570454561	367.364828775134	1456.48661611791	1755.49814657101	GTEX
GTEX-12WSD-0226-SM-59HKO	562.137620973107	1254.95482469899	346.625935551409	368.0041379975	1584.33244303575	1641.78037860808	GTEX
GTEX-12WSM-0226-SM-5LZV6	587.089940545107	1320.58475146613	380.737937869946	374.361015984215	1508.7597375559	1579.7201459574	GTEX
GTEX-12ZZX-0226-SM-5DUXU	575.17682011358	1218.93692679997	404.65581456354	413.844039416102	1517.36851222171	1673.50699939055	GTEX
GTEX-12ZZY-0326-SM-5LZVQ	596.108899730562	1224.81309518001	378.483989224522	404.287996186929	1560.49035403298	1567.46408830499	GTEX
GTEX-12ZZZ-0526-SM-5DUX6	567.11144303153	1325.5994706732	294.094652198668	333.839477606258	1549.63902147198	1712.5573070541	GTEX
GTEX-13111-1726-SM-5EGJZ	639.358925566778	1181.73970103098	369.876523381848	373.3438028213	1635.44405010872	1498.2178670959	GTEX
GTEX-13112-2726-SM-5DUW5	679.422782832135	1366.08576228541	382.213552960911	370.906703351499	1507.19116553378	1348.10706237798	GTEX
GTEX-13113-1826-SM-5LZW4	518.373688982397	1264.03717818466	398.864083587744	404.58421080072	1393.84365125021	1816.6260562188	GTEX
GTEX-1313W-0226-SM-5LZV7	576.591961619023	1340.62559743927	337.315390869734	368.846514154815	1521.46295015326	1605.96557920757	GTEX
GTEX-1314G-1626-SM-5EQ67	628.261160329952	1303.82680415377	405.812945298936	424.092239321356	1519.91124789985	1496.62145217134	GTEX
GTEX-131XE-2426-SM-5EQ5V	525.536895575294	1237.10327649116	411.706020951574	359.191357318042	1523.39171746762	1699.52598496806	GTEX
GTEX-131XF-2226-SM-5EQKG	625.242036831695	1283.86583685774	423.185170062704	394.042043626775	1543.42118469987	1407.55007412846	GTEX
GTEX-131XW-0526-SM-5PNXZ	519.088714352089	1216.75186864367	307.719391351293	370.744058300719	1595.11637890684	1819.34785157827	GTEX
GTEX-131YS-0226-SM-5IJEH	553.479591801808	1286.2154841443	394.814466341116	398.086929072907	1566.0458419883	1567.84374246943	GTEX
GTEX-132AR-0226-SM-5IJBE	466.50097473738	1141.67839366681	454.487132912359	406.891656063369	1451.26967434733	1945.41214681173	GTEX
GTEX-133LE-1926-SM-5N9FV	513.646230034711	1318.35019294233	399.208460061357	389.476413285681	1411.2594539584	1730.75011549705	GTEX
GTEX-1399R-2626-SM-5KLZ7	512.369311886172	1286.77860523384	451.764710354333	431.767480453903	1446.33526585334	1688.89671790747	GTEX
GTEX-1399T-2726-SM-5K7XK	538.069150344725	1313.80601861976	364.327903700323	344.596446157393	1530.43190262888	1708.8852826998	GTEX
GTEX-1399U-2426-SM-5K7XB	614.304269286087	1327.73297776979	471.149593306328	369.881367110606	1440.8697638661	1453.6107304655	GTEX
GTEX-139D8-0326-SM-5IJCJ	581.220727405416	1312.04767069304	348.489595869319	397.839121479513	1495.29390856996	1637.55756304155	GTEX
GTEX-139T4-0126-SM-5HL5G	552.403840379613	1253.60472189497	380.395101345223	433.419886985608	1578.24983921371	1608.03540549076	GTEX
GTEX-139T6-2126-SM-5KM37	526.981959427307	1311.11488125676	435.89440676265	377.317053226529	1293.81251844438	1925.70010047125	GTEX
GTEX-139T8-0226-SM-5L3EA	539.734190758304	1350.28470896911	425.577761068533	453.532653448339	1439.8575214033	1611.34784671972	GTEX
GTEX-139TU-0226-SM-5J1NM	495.494418013668	1162.61799452557	362.809807691543	408.735936390946	1523.59919274939	1904.74578609278	GTEX
GTEX-139YR-2426-SM-5J1OB	620.47352706961	1241.04526910173	400.026699413665	450.743888712296	1532.0688365275	1524.67779802159	GTEX
GTEX-13CF2-2626-SM-5LZZA	589.242287194579	1283.30918825913	251.35326692302	373.469503626262	1568.14019886001	1707.68160267125	GTEX
GTEX-13CF3-2326-SM-5IFGL	468.810007781517	1314.04525433314	473.488313786447	337.025382115458	1332.19721724245	1873.30689216899	GTEX
GTEX-13D11-2326-SM-5IJCY	520.586325136088	1298.82718539471	404.540513268106	364.070149461331	1341.30136691642	1877.5724049662	GTEX
GTEX-13FH7-2226-SM-5IJD4	538.615607672934	1277.92241076822	431.312340446106	381.560172027618	1427.75950643277	1708.03546637911	GTEX
GTEX-13FHO-0326-SM-5IJBH	490.239011564073	1141.84487543311	389.705276665537	398.515066223346	1585.01877637516	1835.0026036217	GTEX
GTEX-13FHP-0226-SM-5K7WD	553.489263811978	1220.39961958522	383.058382680457	391.676023659097	1508.9946994006	1726.67021712087	GTEX
GTEX-13FTW-2526-SM-5IJC8	535.159487531695	1227.14275712786	518.363053913819	399.354945238473	1493.7952658138	1581.72022236217	GTEX
GTEX-13FTY-0626-SM-5L3F8	456.07244110664	1228.26106832112	311.537793583237	401.295620345996	1506.56467363469	1969.38048825371	GTEX
GTEX-13G51-2626-SM-5LZYW	717.748380515736	1263.5683590863	304.949305203335	360.827773104693	1582.71407148404	1411.41736447563	GTEX
GTEX-13IVO-0226-SM-5LZXU	577.603013850359	1272.03312672853	378.182221191516	445.634576380454	1474.78563644624	1702.01541628287	GTEX
GTEX-13JUV-2826-SM-5LZWU	659.801145893908	1300.88313177832	301.538415195351	393.221827224047	1584.29383882084	1442.57440826707	GTEX
GTEX-13JVG-0226-SM-5J1MW	446.030128932745	1221.83127217137	409.410347006252	381.936282990818	1357.08620237932	2066.20235963494	GTEX
GTEX-13N11-2626-SM-5K7UQ	485.488621890125	1146.10494390887	635.90622451459	363.957786108416	1513.44362836409	1642.54063712537	GTEX
GTEX-13N1W-0226-SM-5K7W6	607.548341724276	1221.99613316396	373.168913198448	388.949386650281	1581.7345860191	1526.51550489473	GTEX
GTEX-13N2G-2726-SM-5J1MG	490.663397363725	1337.87418956439	375.865496214651	380.085780424085	1434.86229973717	1780.69881655827	GTEX
GTEX-13NYS-0226-SM-5MR49	485.071538471032	1160.66722708578	447.214835901136	455.474154955613	1340.10757235376	2035.55733295285	GTEX
GTEX-13NZ8-0926-SM-5MR3U	584.493563982053	1378.05818779146	348.548574337523	404.763592247442	1417.59679604806	1613.91311612195	GTEX
GTEX-13NZ9-0526-SM-5J1OX	558.608977451276	1325.24930492538	311.315983837268	397.52887968183	1566.45324062005	1624.02149290788	GTEX
GTEX-13NZA-0126-SM-5K7UH	473.435425798267	1145.58375407436	446.445821226622	391.76790890601	1432.73848227954	1980.29227253864	GTEX
GTEX-13NZB-2426-SM-5K7UF	520.116801245986	1326.02687490252	357.904339742105	374.017192692013	1451.63770722081	1760.21720789093	GTEX
GTEX-13O1R-0226-SM-5K7U5	517.557558576134	1052.59220546397	390.603111218175	438.976051018382	1538.18327651694	1888.82665210173	GTEX
GTEX-13O21-1526-SM-5K7W4	529.703860546038	1290.88719655928	346.524511212953	375.716076943596	1458.81076237633	1783.05259992588	GTEX
GTEX-13O3P-0226-SM-5KM3Z	508.447245727169	1308.62041789378	307.112491634157	339.873423197493	1392.10267222437	1981.21091536181	GTEX
GTEX-13O3Q-2326-SM-5KM3G	495.885417027512	1181.98720236266	472.330778818833	371.248857984217	1450.04136501778	1897.07040198049	GTEX
GTEX-13O61-2426-SM-5J1NV	491.783049342104	1347.27213211126	422.725453149884	394.682516992953	1414.78258967736	1724.625094733	GTEX
GTEX-13OVI-1326-SM-5IJBO	557.247176251711	1216.84569004829	416.28101889059	351.994390265292	1529.26524182997	1646.41185146319	GTEX
GTEX-13OVJ-0326-SM-5L3GL	566.710846482124	1243.24766862894	357.056513246366	346.973616701484	1510.28735317978	1788.39591763608	GTEX
GTEX-13OVL-0326-SM-5IJCS	617.331127762579	1263.95428670035	370.181482747324	374.618743650484	1623.19811710616	1445.23446553361	GTEX
GTEX-13OW6-0526-SM-5L3HY	699.213292309584	1170.07324591027	351.66446372578	432.80993337097	1609.75792856317	1401.12044007292	GTEX
GTEX-13OW7-0226-SM-5MR3N	625.149282870099	1222.82271257254	347.159543384741	413.505365506152	1526.76683125551	1684.69508042604	GTEX
GTEX-13OW8-1226-SM-5K7XD	589.381425584142	1364.10825129356	351.676595789471	384.849136975832	1502.39846141431	1551.3309485255	GTEX
GTEX-13PDP-0226-SM-5K7W9	507.822680915771	1350.22337740569	368.636301900976	426.551773111186	1431.13053795697	1762.43015832708	GTEX
GTEX-13PLJ-0126-SM-5L3HU	553.802125671997	1240.27360881214	326.480715321761	327.966719071994	1602.50062117387	1736.67038847372	GTEX
GTEX-13PVQ-0226-SM-5SIBG	575.030181117722	1226.27762458402	396.46939805922	402.321778275638	1561.66612159724	1578.58622677093	GTEX
GTEX-13PVR-2426-SM-5RQHN	408.400528793851	1120.53903114907	886.115395192099	374.808448387199	1397.52552898443	1550.4597285993	GTEX
GTEX-13QBU-2526-SM-5LU4X	463.999573816124	1215.94046809223	480.829353398525	368.105902251386	1429.55233472043	1852.98315331381	GTEX
GTEX-13QJ3-0426-SM-5RQHP	692.479890087883	1272.14561153145	375.154283072015	503.421259183938	1540.82564858146	1297.22222356261	GTEX
GTEX-13RTJ-2526-SM-5S2Q3	597.242644611664	1215.04899154888	470.489680490333	410.829491384698	1394.1459874216	1671.3792601182	GTEX
GTEX-13S7M-0226-SM-5S2UG	493.586593371828	1226.19731760134	358.098148998967	357.36215591517	1465.83531467106	1924.30247554643	GTEX
GTEX-13SLW-0226-SM-5S2NA	422.688758474412	1233.41888111862	531.010680274198	416.441167867379	1410.93468387607	1824.65863717178	GTEX
GTEX-13SLX-0426-SM-5QGRC	490.163268880736	1281.76584469646	335.887397766419	376.120880663355	1508.57956468775	1810.38068042999	GTEX
GTEX-13U4I-0226-SM-5SIB1	583.054024397146	1254.48860730675	367.45124767286	413.718879606879	1571.85228148345	1564.93270196437	GTEX
GTEX-13VXT-0226-SM-5LU9Q	436.990161097921	1238.4703159551	481.263538854132	369.900794924033	1260.78597232758	2076.34799927826	GTEX
GTEX-13VXU-0226-SM-5SI9R	552.031206286438	1392.8772223896	368.697542321708	390.279514302104	1557.35613650089	1470.58165408218	GTEX
GTEX-13W3W-2526-SM-5SI9P	499.060986319457	1280.54736902982	470.372267142008	376.107330993015	1465.26551746899	1690.33209737428	GTEX
GTEX-13X6K-0226-SM-5QGPB	508.937297890185	1343.65857496821	361.96813625783	383.57065417978	1394.55926962677	1802.27374529884	GTEX
GTEX-13YAN-0426-SM-5O9DR	557.1260681598	987.062446734435	415.393266588045	369.637969936381	1539.67520495438	1944.42998079167	GTEX
GTEX-144FL-0226-SM-5Q5D4	453.270311594933	1271.09338950252	363.743939604441	386.664293353552	1432.54995450681	1971.16607283457	GTEX
GTEX-144GL-0226-SM-5QGOX	620.548434398744	1201.88452928788	300.625368881512	405.9711362674	1674.98543490479	1516.63912185109	GTEX
GTEX-144GM-1926-SM-5LUAN	562.333289787764	1290.47702236163	390.971664760828	393.282398343006	1433.75364242772	1665.96563885847	GTEX
GTEX-145LS-0226-SM-5O9A5	569.354203443947	1313.30331886753	351.218966100971	421.35482945366	1512.12453003007	1671.98998169122	GTEX
GTEX-145LT-1826-SM-5QGP4	564.3880235464	1278.59825512192	385.111363888139	372.522301251115	1450.37950645799	1657.12750034966	GTEX
GTEX-145ME-1926-SM-5SI9S	572.017424837546	1264.0075115897	451.263422679991	402.871315850619	1411.43071864772	1570.25361537308	GTEX
GTEX-145MF-0526-SM-5LUA6	679.891536936506	1326.92240221779	341.964336438311	468.356631925459	1540.43628473915	1365.28767206436	GTEX
GTEX-145MI-0426-SM-5O99V	544.699041190486	1164.48276751772	343.420861879876	355.442337587421	1637.32819072565	1743.31345804026	GTEX
GTEX-145MN-2626-SM-5NQAH	538.645783914067	1140.88522304616	435.47559954985	382.084384252248	1466.87718534697	1787.91507662226	GTEX
GTEX-145MO-0426-SM-5QGP6	570.713210557564	1377.50956431478	362.42169338853	403.949603454699	1407.31348418891	1615.25573117506	GTEX
GTEX-146FH-0226-SM-5QGPQ	488.537058041838	1251.49721713995	387.748516269576	324.052267161541	1474.62037078129	1867.67145708488	GTEX
GTEX-146FQ-0226-SM-5NQAL	447.325948164925	1212.86273635208	335.011680146284	432.80597604163	1486.40038810657	1986.06414975246	GTEX
GTEX-146FR-1826-SM-5QGPF	493.174981303538	1268.37133586153	653.105145870178	396.25531641384	1431.21821934819	1485.08774915216	GTEX
GTEX-14753-0326-SM-5QGQB	559.845595438919	1283.22084366559	370.680009492646	362.648258728073	1515.34597501287	1665.19018758347	GTEX
GTEX-147F3-0626-SM-5NQ9I	570.079443132024	1291.96494913218	397.237434131056	376.786232902259	1346.69096683396	1729.95022652078	GTEX
GTEX-147GR-0426-SM-5S2OL	672.548801443734	1315.21594520659	358.321107570028	437.288668165855	1442.60027411601	1528.62911337579	GTEX
GTEX-148VI-1726-SM-5S2W9	632.994805640586	1332.42264788401	306.241342361123	425.530297364487	1521.33420051022	1522.33512327037	GTEX
GTEX-1497J-2326-SM-5NQBK	544.760996708302	1251.43125586368	383.023522716943	362.446514583895	1490.85141630499	1675.07971590172	GTEX
GTEX-14BIL-0226-SM-5SI9E	508.715081240112	1150.42212496976	479.770296631837	438.433099978462	1487.08725361009	1725.80792178637	GTEX
GTEX-14BMU-2126-SM-5S2TS	602.947669313227	1328.12128643479	375.652401453514	436.392818111523	1409.71462214983	1575.07169356397	GTEX
GTEX-14BMV-0226-SM-5S2N2	609.1950354659	1195.63665655203	365.593119135898	422.570498004049	1586.27063227504	1524.20581004556	GTEX
GTEX-14C39-2526-SM-5S2UH	491.979177469122	1284.53812751458	380.356244906857	346.013082152249	1366.98940469206	1975.5885729064	GTEX
GTEX-14C5O-0226-SM-5SI6O	653.982674868912	1231.93240755382	369.21457863655	406.200098079113	1632.11688980766	1400.81215501044	GTEX
GTEX-14DAR-1926-SM-5S2NQ	567.844536650205	1316.92695808577	398.663944320984	409.193058537981	1427.92739291313	1607.7307137476	GTEX
GTEX-14E6C-0226-SM-5S2N3	446.067116742665	1202.64377139869	389.213192192552	390.545283332936	1500.52820803211	1908.3497915613	GTEX
GTEX-N7MS-0326-SM-4E3K2	529.536669841993	1256.76046175985	372.259109519296	366.346649770705	1518.87636874845	1773.99658534271	GTEX
GTEX-NFK9-0326-SM-3MJGV	683.707209752124	1276.97791773814	404.450256058748	421.597633153726	1588.17111093957	1226.8704691172	GTEX
GTEX-NL3G-0226-SM-4RGLU	470.776103609969	1313.73330017315	345.516405833719	323.979542197637	1474.59637246419	1875.07428060872	GTEX
GTEX-NPJ8-0226-SM-48TBN	514.273709777805	1294.57182173366	382.471607551968	389.869250048625	1435.8074116836	1759.99282487281	GTEX
GTEX-O5YT-0226-SM-32PK5	838.124301434872	1217.69422841865	218.16496329229	407.731399030108	1337.23976760729	1673.09381609763	GTEX
GTEX-O5YV-0226-SM-48TBY	490.215039606464	1326.66715198777	432.024760362538	371.461254943271	1301.19679742309	1886.65635018637	GTEX
GTEX-OHPK-0226-SM-3MJH6	592.410099175323	1298.01310233075	384.590739554085	411.016744508024	1491.2900483117	1582.39670761338	GTEX
GTEX-OHPM-0226-SM-3LK61	439.080657627828	1190.25671934264	847.170754600764	348.019291765275	1481.30971167815	1398.95888820347	GTEX
GTEX-OHPN-0226-SM-48TBV	492.712271402735	1159.12294611395	383.31163442533	371.098237469823	1392.6113388077	2045.92686027511	GTEX
GTEX-OIZH-0226-SM-2YUMH	540.490717133994	1320.34413502665	368.08819147334	376.707446940838	1469.07309375701	1691.71946931827	GTEX
GTEX-OIZI-0226-SM-2XCEE	762.491108816297	1228.53465525485	296.711509363812	435.511473932686	1490.22734386994	1481.52660654021	GTEX
GTEX-OOBJ-0226-SM-2YUMM	663.211139758641	1266.43313073409	295.257182580423	403.201920212193	1602.18013884145	1440.91819205114	GTEX
GTEX-OOBK-0226-SM-2YUMF	516.408492193607	1277.79700194012	346.826398073811	355.371986818451	1250.4771323516	2079.22140263541	GTEX
GTEX-OXRK-0326-SM-3NB3R	527.280625058883	1218.93866421797	413.617432233516	426.080662715797	1621.31862412234	1527.87451820678	GTEX
GTEX-OXRL-0226-SM-3NB18	388.794466546512	1106.52419700242	959.572240189216	351.954781031553	1442.18296179545	1448.12570676854	GTEX
GTEX-OXRN-0226-SM-2I5EJ	463.511876349993	1149.58292252905	366.006401210641	404.219317714058	1571.8086290339	1936.11261930342	GTEX
GTEX-OXRO-0226-SM-3LK6F	567.367633787841	1206.25875683396	433.16902492142	395.14509094812	1464.79555559473	1716.82690803697	GTEX
GTEX-OXRP-0226-SM-3NB14	482.754288480952	1272.70811547932	391.764036286653	389.92399127624	1384.74578536419	1908.31017192165	GTEX
GTEX-P44H-0326-SM-2XCES	575.073142246267	1308.52666636396	357.193618364245	396.87908072286	1290.73119826606	1929.10520143275	GTEX
GTEX-P4PP-0226-SM-5S2VR	613.691602465384	1241.56214912286	368.975203145702	464.121802826921	1476.07116492961	1591.47491500746	GTEX
GTEX-P4PQ-0226-SM-2S1NK	542.812806510359	1199.30597628129	340.47364433461	405.00877061031	1561.38263405756	1718.58423553389	GTEX
GTEX-P4QR-0426-SM-2S1NV	595.92194672251	1265.90638125104	308.43486150703	382.748225206732	1547.7075387609	1619.79301483768	GTEX
GTEX-P4QS-0226-SM-3NB1U	544.549903889803	1290.99084076748	377.799894920141	371.652731456784	1488.19539639794	1701.81576649483	GTEX
GTEX-P4QT-0226-SM-3LK68	359.788874182601	1038.90252558215	896.132742683501	339.077385198862	1446.60017224035	1687.57339008538	GTEX
GTEX-P78B-0226-SM-3NB1Z	588.399545585561	1282.46304855078	362.637251427811	425.703578429052	1531.24403209857	1552.31145318158	GTEX
GTEX-PLZ4-0226-SM-5SI7M	493.328019092218	1236.38815477993	386.859653695806	426.667088231073	1444.09750290505	1914.28977831529	GTEX
GTEX-PLZ5-1826-SM-3NB22	506.861266284773	1270.78996535247	361.043802363636	409.069994475737	1492.13565141548	1776.34681708154	GTEX
GTEX-PLZ6-1326-SM-3NB24	615.655996931835	1333.94632071993	417.482263969456	433.467195052778	1391.61223132103	1507.82505724715	GTEX
GTEX-POMQ-2326-SM-5S2VS	446.780910765101	1298.45116048559	292.924011993458	355.33057115411	1438.90436027247	2091.13552487747	GTEX
GTEX-POYW-0726-SM-2XCEO	527.080557418437	1305.84590932031	400.775510761432	512.955712043961	1507.90811736059	1563.49056229597	GTEX
GTEX-PSDG-0326-SM-48TCP	485.807038581909	1334.55610475538	453.745722626096	375.481273600276	1436.29447287244	1715.49806044344	GTEX
GTEX-PWCY-1926-SM-3NB25	600.657137711355	1281.73913899472	424.724348396721	438.444277244558	1435.80422846953	1550.06353615985	GTEX
GTEX-PWN1-0226-SM-5SI7O	586.79373992813	1253.05427979926	410.825915107647	402.268594249616	1394.02571922853	1689.71101324798	GTEX
GTEX-PWOO-2226-SM-2S1P1	538.086002560967	1204.68521687568	334.392117180119	345.855496364398	1440.83184257975	1919.25853395802	GTEX
GTEX-PX3G-0226-SM-3NB2C	517.624879914233	1197.18898838867	360.586825793995	381.199049842549	1446.46216775796	1920.97630724038	GTEX
GTEX-Q2AG-0226-SM-2S1P4	655.531968351734	1256.0747023883	227.087105789866	332.308407948525	1430.03681635013	1747.6366799411	GTEX
GTEX-Q2AH-1726-SM-3NB2B	555.148409720939	1311.43501427119	379.546852500862	380.655950081871	1484.493936928	1662.10663453085	GTEX
GTEX-Q2AI-1426-SM-2S1P5	592.58773980632	1294.31241037319	335.467392822496	391.27416796016	1470.80950974028	1644.48841079202	GTEX
GTEX-Q734-1826-SM-2I3EL	500.060745471979	1131.54283064348	321.455703715764	374.719988385912	1542.01929102407	2029.57781128811	GTEX
GTEX-QCQG-1826-SM-2S1P2	549.016648153716	1217.8443967025	344.081632458301	415.681895756859	1443.84587958402	1825.64023762711	GTEX
GTEX-QDT8-0226-SM-32PL4	609.494927232527	1123.70793410558	351.073020793216	548.834963557218	1432.71544999618	1794.69559569611	GTEX
GTEX-QDVJ-1826-SM-2S1P3	630.080435124422	1232.43393517876	298.240663488526	380.358008241607	1482.1912718809	1654.37769965433	GTEX
GTEX-QEG4-0326-SM-5S2UQ	679.556108625926	1320.61817753693	278.607201345885	394.20156472	1510.54683539537	1504.25948656914	GTEX
GTEX-QEG5-0326-SM-2S1PB	606.175450056409	1350.1657967984	239.471089675863	396.399821663785	1414.53450007657	1699.53321508305	GTEX
GTEX-QEL4-0326-SM-3GAE5	564.914587181846	1340.26337221697	306.045393021078	409.576778087706	1444.09345320585	1661.89875574484	GTEX
GTEX-QESD-1526-SM-2S1QT	672.479765490768	1184.29946736086	324.529098231679	395.869267228488	1538.08273951908	1511.69851622298	GTEX
GTEX-QLQ7-1526-SM-2S1QA	626.648429436749	1234.70831675332	286.721981829425	413.797781053479	1524.9831677316	1648.92440430504	GTEX
GTEX-QLQW-1226-SM-2S1Q9	673.962154929057	1196.38498039663	249.785730258606	373.124547868783	1358.18129826585	1840.95648202734	GTEX
GTEX-QMRM-1726-SM-2S1QG	607.973574205198	1196.90474942941	486.67846356161	402.270279825988	1453.22617396367	1533.28471139901	GTEX
GTEX-QV31-1326-SM-2S1QE	637.421838178177	1324.39530121918	323.074785584431	456.724175910899	1416.55841122985	1611.9710523553	GTEX
GTEX-QV44-1825-SM-447CF	553.526003575248	1287.99063382316	379.390815134842	439.576609608463	1422.37516903549	1741.36150193396	GTEX
GTEX-R55C-1626-SM-48FEG	530.17484483217	1296.86555596156	426.28103692289	371.360499566805	1437.81085498358	1685.8418725764	GTEX
GTEX-R55D-0326-SM-48FES	542.156324429137	1272.88876143668	460.07523577198	415.251171643479	1479.84533836309	1601.12049096109	GTEX
GTEX-R55F-1426-SM-2TF53	551.945513209813	1187.83024890796	262.141444273997	419.972612935306	1598.70135351248	1793.05185769395	GTEX
GTEX-R55G-2426-SM-2TC5I	639.959506899104	1232.35182919162	330.073833260372	349.194192551146	1311.86134270882	1865.45002981163	GTEX
GTEX-REY6-0326-SM-2TF5A	629.078577980964	1187.30839641411	327.057360070692	363.19243639576	1468.50988544932	1799.95172026034	GTEX
GTEX-RM2N-1726-SM-2TF55	601.113799818455	1251.67818214229	346.1566263997	386.217043287591	1365.4492384696	1831.84327848602	GTEX
GTEX-RTLS-0226-SM-2TF5E	612.949827925237	1292.74283425847	338.995981030392	411.118994247678	1378.79886313677	1720.99797067061	GTEX
GTEX-RU72-1026-SM-46MUG	521.287208372429	1270.63818833231	405.953482537095	394.13761240918	1453.06967737745	1779.80571736778	GTEX
GTEX-RVPU-2326-SM-2TF6R	653.849632595266	1240.25791916206	258.736297085278	345.80387443399	1499.46838723794	1715.8478235372	GTEX
GTEX-RWSA-0226-SM-2XCBA	598.416356374905	1224.2032502314	338.624224921685	356.146564454716	1448.4521724115	1800.8972008998	GTEX
GTEX-S32W-2226-SM-2XCAY	587.961199500194	1250.016013871	415.35396859933	416.56789577069	1405.54620259334	1678.82366445806	GTEX
GTEX-S33H-1126-SM-2XCB6	584.903635449504	1319.84648766437	305.474119206704	415.506950580923	1476.30877134166	1626.66540452273	GTEX
GTEX-S341-1626-SM-3K2B8	528.032557869991	1245.44786387862	389.326308586068	356.031814985645	1334.60153540459	1898.12256970779	GTEX
GTEX-S3XE-1626-SM-3K2AJ	602.630473050348	1246.79648824936	432.692474218081	417.18317505177	1436.57550662314	1544.10137099632	GTEX
GTEX-S4P3-1526-SM-3K2AV	509.960923259068	1219.803503028	422.430938739284	374.045972877387	1446.486658749	1779.55117715271	GTEX
GTEX-S4Q7-1626-SM-3K2AE	371.411216911065	1145.5398395632	717.706013172388	356.245859901697	1335.18078256248	1882.27355161084	GTEX
GTEX-S4UY-0226-SM-3K2AP	590.035452373028	1311.16724147124	411.323408861497	460.756811060166	1439.02644471923	1546.9503540198	GTEX
GTEX-S4Z8-1726-SM-3K2AX	615.932804610231	1199.59404574938	361.655096346242	387.769730152301	1583.81394160017	1526.45095301863	GTEX
GTEX-S7SE-0226-SM-2XCD4	682.184348735148	1316.96237980689	286.388226501478	409.098654271252	1475.63124610184	1526.28233548882	GTEX
GTEX-S7SF-1826-SM-3K2AD	585.003542132119	1281.02065779144	387.480253382948	411.538239148841	1402.88293585363	1637.50324692367	GTEX
GTEX-S95S-1326-SM-2XCDK	634.414955206695	1168.17203406673	317.378985722198	345.064827283934	1487.47790134856	1790.71032866229	GTEX
GTEX-SIU8-0226-SM-2XCDS	660.643021315616	1300.45242229542	308.689030614731	390.845842493215	1594.61721734958	1415.45826686506	GTEX
GTEX-SJXC-0226-SM-2XCDU	633.683715281034	1324.30985855877	281.777360807057	373.301165550632	1506.9034715671	1593.751021648	GTEX
GTEX-SN8G-0226-SM-4DM6B	463.500483605022	1275.90134517257	415.90414917523	365.849102513117	1424.63813488207	1863.19777113072	GTEX
GTEX-SNMC-1326-SM-2XCFK	662.054669850181	1325.49701627051	343.535239173302	443.96644672529	1417.68953194888	1517.9664246076	GTEX
GTEX-SNOS-1426-SM-32PLY	508.065297848334	1139.35201515191	834.395173686279	318.423009781184	1344.47461195759	1618.70858309164	GTEX
GTEX-SSA3-0226-SM-32QPN	655.928994543115	1180.57029267569	263.297183446658	371.379024947951	1578.40847128905	1655.37781729267	GTEX
GTEX-SUCS-1826-SM-32PM1	571.272067732374	1271.14217730328	378.366591456309	375.274629867939	1360.40991515336	1853.58174239808	GTEX
GTEX-T2IS-0226-SM-32QPH	712.121995667347	1223.86054192544	350.992138975423	362.867762131895	1415.05226532355	1692.82938757685	GTEX
GTEX-T5JC-0526-SM-32PM7	719.877743893058	1310.51766705281	281.310170684547	365.926954082914	1482.86189336714	1554.48840467596	GTEX
GTEX-T5JW-1726-SM-3GADN	579.668162339239	1226.26450446737	384.82731613334	409.659836196018	1447.9889482319	1709.93833163435	GTEX
GTEX-T6MN-0226-SM-32PMD	609.883747786	1232.24361537606	353.164488547481	430.231444215609	1599.6123777971	1542.55182967227	GTEX
GTEX-T6MO-1726-SM-33HB8	550.934413641227	1296.00453009711	402.424087764434	422.364939894487	1328.78281290117	1762.73398378071	GTEX
GTEX-T8EM-1126-SM-3DB7D	591.062927791355	1302.78894699106	379.855147369311	415.425650926014	1512.06956141125	1555.56124490284	GTEX
GTEX-TKQ1-1126-SM-4GIAZ	506.08824253468	1306.64482586856	465.028747201357	379.375833737173	1336.06343735204	1771.20777012727	GTEX
GTEX-TML8-2026-SM-32QOP	631.449381139315	1196.95610675782	361.416425318764	466.056432241473	1457.74112640418	1653.02651306706	GTEX
GTEX-TMZS-0226-SM-3DB9N	473.667697520043	1235.63196852434	398.193576165867	349.215936978853	1342.98693415305	2038.16003825365	GTEX
GTEX-TSE9-0226-SM-3DB84	578.407370706444	1353.74885576793	383.368483921617	457.125075928321	1540.64279731871	1389.8530029574	GTEX
GTEX-U3ZN-2626-SM-3DB7T	557.278707373396	1320.21747883576	334.110882033678	451.927293244898	1486.90257764479	1622.59016317295	GTEX
GTEX-U412-0526-SM-3DB9I	594.403945255794	1425.2093088408	328.72730622903	359.396721697236	1453.24395749221	1514.78008599713	GTEX
GTEX-U4B1-1726-SM-3DB9F	523.654050539689	1240.9251304227	411.22727100562	403.637737532416	1420.42971749849	1743.00601200953	GTEX
GTEX-U8XE-0426-SM-3DB91	562.096419730132	1234.52759623757	369.501977172897	377.059961285195	1469.47455216566	1719.57689106092	GTEX
GTEX-UJHI-1626-SM-3DB9A	532.672912294777	1211.72306039137	372.847036342939	414.982001280188	1521.27429081068	1734.36791922745	GTEX
GTEX-UTHO-0426-SM-5SI7N	711.217597094439	1228.3108854636	367.560768323467	439.614164720093	1590.00880724195	1310.99641850799	GTEX
GTEX-VUSG-2426-SM-4KKZG	452.971481867409	1222.46985836196	404.15613142223	358.850271731182	1451.1654393912	1964.86965019129	GTEX
GTEX-W5WG-2526-SM-4SOJ2	649.287899529583	1261.57251958303	396.300307420326	352.973676043518	1458.15662985141	1564.6820773993	GTEX
GTEX-W5X1-2626-SM-4LMI8	556.490509488477	1247.62037458523	351.359062299188	408.214481885005	1578.15668535694	1615.22442730382	GTEX
GTEX-WEY5-1926-SM-3GIL8	599.539800626123	1224.52152218647	366.005144183428	467.586749478568	1475.51861975018	1603.55465803374	GTEX
GTEX-WFG8-2326-SM-5S2UE	560.520455944991	1223.63757028729	378.627811908057	384.274090910998	1417.32060217158	1843.28841281929	GTEX
GTEX-WFJO-1926-SM-3GILA	530.427037670703	1188.7442355685	324.11825510424	398.058350863407	1531.59374429656	1841.67304045865	GTEX
GTEX-WFON-2226-SM-3TW8W	519.857570612515	1214.04318590312	367.39444621324	371.016721670341	1545.8102057805	1836.57787106258	GTEX
GTEX-WH7G-2226-SM-3NMBN	412.234698948999	1181.58797622477	898.234946866234	366.660448150337	1336.25371606024	1531.93223713154	GTEX
GTEX-WI4N-1126-SM-3LK7Q	516.333443197477	1225.80166781219	409.675888830492	331.814581958494	1559.59791172465	1761.04596594147	GTEX
GTEX-WL46-0326-SM-3LK6Y	565.267241721362	1235.926058958	359.337420836714	364.230182622145	1543.8444880987	1669.38458722666	GTEX
GTEX-WVJS-0226-SM-4MVOU	474.500885175385	1283.20944404414	298.952059138923	349.762263130283	1537.51738791551	1825.88114761018	GTEX
GTEX-WVLH-0226-SM-3MJG6	501.28789736884	1210.00807778991	352.123766925114	373.74447610247	1563.54708839653	1837.29685542791	GTEX
GTEX-WY7C-2426-SM-3NB2V	563.782438354309	1220.18820463993	408.309509331571	409.921461055501	1457.94087319286	1715.73123990909	GTEX
GTEX-X15G-2326-SM-4PQZS	543.552844644541	1200.22492780789	445.783701840906	379.180219776569	1422.45051023811	1742.41932965072	GTEX
GTEX-X261-0226-SM-3NMD2	488.877826208663	1382.21519410837	407.361671617602	379.999510621743	1443.73325730017	1702.40272902056	GTEX
GTEX-X4EO-0426-SM-4QASA	573.118324210833	1245.91484016542	396.144021646604	377.066205238619	1592.68544823756	1511.43219050286	GTEX
GTEX-X4LF-1726-SM-3NMBZ	555.201529510747	1225.17527649109	409.159798191962	413.507680019377	1533.24996014839	1641.59279674995	GTEX
GTEX-X4XY-0326-SM-46MVZ	615.828932662237	1200.29600345541	406.216947247571	379.204955156907	1631.94973448314	1487.0457559405	GTEX
GTEX-X5EB-2426-SM-4E3HX	584.825571127547	1228.59340852269	360.412883223505	392.894336774358	1532.83723870394	1707.62161774351	GTEX
GTEX-X638-0226-SM-47JZ9	667.674917406355	1180.99059280039	351.76911652377	450.369053169634	1555.57768849539	1549.09634537952	GTEX
GTEX-X88G-0226-SM-4GIE4	467.107534962983	1182.2866722012	368.766528091014	390.344197797687	1511.42775155032	1928.89929423187	GTEX
GTEX-X8HC-0226-SM-4E3K1	474.4003166891	1380.91599680758	350.434166298578	337.021851028202	1403.62387589726	1868.74742290766	GTEX
GTEX-XAJ8-0926-SM-47JXZ	524.756478071989	1216.87544262664	434.253122647429	394.395848864268	1503.25829499844	1724.3312482543	GTEX
GTEX-XBEC-0326-SM-4AT4M	622.055692098445	1163.18595298199	291.729394527969	376.46420286564	1613.2502429964	1658.73784708322	GTEX
GTEX-XBED-2326-SM-47JYR	581.443018543971	1315.29219207807	422.655742292642	420.541441383196	1435.55553356392	1557.36830533931	GTEX
GTEX-XBEW-0726-SM-4QARX	536.43849779712	1266.01424589759	467.726178128804	392.769444124576	1444.73435692513	1597.55982824507	GTEX
GTEX-XGQ4-2226-SM-4AT4Y	591.760115611005	1265.99161714507	433.239410239607	379.224140752823	1421.59353637949	1657.24501314928	GTEX
GTEX-XK95-0426-SM-4AT4R	532.774681997498	1386.73065913725	346.128397686455	371.486315357481	1420.05663727407	1748.55375617035	GTEX
GTEX-XLM4-0226-SM-4AT4N	582.305822242621	1282.62284885135	373.772884504828	421.569944914258	1463.52817097191	1704.32893533254	GTEX
GTEX-XMD2-0226-SM-4WWEE	437.259750964454	1236.20478390987	465.8886117098	430.41700374892	1454.30475365711	1901.4853560775	GTEX
GTEX-XMK1-2226-SM-4B673	526.341407716718	1275.03695191328	556.257631033739	454.591068521433	1453.4328192098	1491.74867690446	GTEX
GTEX-XOTO-0226-SM-4B66H	750.516894286101	1165.30951713609	390.570463156679	471.958826143577	1590.92118227821	1303.41435052806	GTEX
GTEX-XPVG-2726-SM-4B66W	457.546555949905	1269.25213294755	713.364417139131	362.803270380546	1317.8416877517	1643.94292176233	GTEX
GTEX-XQ3S-1626-SM-4WAYN	715.310090879557	1262.87795806936	389.935429663617	383.637220201246	1655.82563439983	1101.45852875291	GTEX
GTEX-XQ8I-0526-SM-4BOPS	557.954469005406	1269.27794080127	440.141675150673	384.374555776359	1487.9457151497	1583.71274058253	GTEX
GTEX-XUJ4-2526-SM-4BOO4	538.510572907058	1236.5362706545	479.858298963793	379.197562440611	1394.48227658998	1756.07042443659	GTEX
GTEX-XUW1-0526-SM-4BOP3	533.011537057081	1284.96123281594	387.630272389449	371.51871768629	1400.75684317085	1761.19499941446	GTEX
GTEX-XUYS-0226-SM-47JX1	612.357952300988	1253.81683286043	336.635836375212	382.136451061561	1512.4782923353	1592.06118255092	GTEX
GTEX-XUZC-1826-SM-4BRVO	506.777081755035	1228.77638067752	465.897006191347	421.356881452363	1431.67334989396	1769.23484244433	GTEX
GTEX-XV7Q-2626-SM-4BRVA	348.578089904248	1123.07794963403	808.444626187081	335.99887713741	1402.98454691483	1760.34637759451	GTEX
GTEX-XXEK-2426-SM-4BRUS	656.148090869357	1286.87220410272	385.944477865504	445.682817814127	1531.26724275157	1385.93074928007	GTEX
GTEX-XYKS-2726-SM-4E3IC	634.489064188543	1153.51988335833	431.998733602204	470.648123131885	1589.05095784503	1479.88625713632	GTEX
GTEX-Y111-0226-SM-4SOIW	670.108058456105	1409.09419420245	317.487264653944	388.485373076551	1535.96775132706	1360.37890427093	GTEX
GTEX-Y114-2326-SM-4TT7X	493.293425144661	1268.58840261277	440.821275843929	402.593530153869	1503.84835029545	1658.39418676879	GTEX
GTEX-Y3I4-2226-SM-4TT7O	547.634441290668	1189.34014996144	429.266626555442	408.864068720997	1551.59579680769	1691.56592130245	GTEX
GTEX-Y3IK-2526-SM-4WWDM	424.294562590005	1163.73946105208	460.252834154044	441.491361642209	1497.05379625085	1892.8321284662	GTEX
GTEX-Y5V5-2426-SM-5IFJA	490.157360012096	1170.80869528443	531.890680128613	419.24484737136	1519.02609596088	1692.0492263248	GTEX
GTEX-Y5V6-2526-SM-5IFJV	447.461505262674	1230.40994113992	556.812436447168	322.032199209237	1405.22320330622	1761.9073077973	GTEX
GTEX-Y8E4-0726-SM-4WWFN	545.450687396727	1294.92779417237	401.421109209466	394.679540841921	1572.32109719433	1516.15977021593	GTEX
GTEX-Y8E5-0226-SM-57WCM	600.059067597871	1232.11309703548	307.178693873517	387.413497758991	1536.8779162456	1749.25345769667	GTEX
GTEX-Y8LW-1926-SM-4WWFZ	533.423059155825	1279.30424822543	456.281055586536	398.846324187167	1501.34412398856	1574.22511597132	GTEX
GTEX-YB5E-2126-SM-5IFI7	536.909917348829	1228.40503374393	488.860689372805	385.46725755909	1308.15493515713	1784.5681931284	GTEX
GTEX-YB5K-2226-SM-4WWG1	528.840063135703	1265.71290487381	521.514440792745	420.528733917947	1433.9060841575	1550.97760049696	GTEX
GTEX-YEC3-1226-SM-5IFI8	519.478947229056	1278.30981928015	476.432753790617	390.986860964558	1517.04551906283	1573.43602020347	GTEX
GTEX-YEC4-2426-SM-57WFO	497.503122583598	1252.81108608421	489.192935199988	353.008945400452	1444.10637888804	1737.47307613833	GTEX
GTEX-YECK-0226-SM-4W215	666.277429564353	1193.01307180079	321.445532390914	388.814802537122	1678.08110789477	1401.80619857147	GTEX
GTEX-YF7O-2426-SM-5IFJL	463.424708669919	1222.33147366736	428.101477834228	347.038631150623	1433.32516631663	1900.75473533512	GTEX
GTEX-YFC4-0226-SM-57WD2	567.200614802577	1345.41002203011	290.956446391464	361.446770594257	1483.06329324409	1759.98725657584	GTEX
GTEX-YFCO-2026-SM-4W21Q	400.549281464004	1212.08916701748	442.916020566467	311.85623264172	1518.5093086733	1973.30234272562	GTEX
GTEX-YJ89-0226-SM-4TT3Y	605.662231978216	1289.41847181732	354.612827457258	394.55320880048	1524.4386417968	1528.0532604145	GTEX
GTEX-YJ8A-0526-SM-5IFHT	625.019936383691	1213.45948435526	355.048367973103	376.561402143719	1593.33999001227	1530.29867743191	GTEX
GTEX-YJ8O-2426-SM-5HL7S	532.691606950269	1223.76779448662	432.46695763801	407.67056037873	1447.94106634899	1749.00894381468	GTEX
GTEX-Z93S-0226-SM-5HL7R	616.073685723661	1301.4891008937	397.657680945875	378.26722335755	1493.99625523718	1525.0894511941	GTEX
GTEX-Z93T-0226-SM-5HL5Z	574.882806236224	1272.63961251528	357.795720725445	419.68768135687	1539.61845869372	1586.67946397833	GTEX
GTEX-Z9EW-1826-SM-5CVMA	437.735625138661	1141.34993064172	807.219981360019	348.023157681921	1495.38331084254	1527.90992847531	GTEX
GTEX-ZAJG-0226-SM-5HL81	442.04659506655	1259.53813979817	409.700804112272	369.501299695654	1379.11135710274	2019.71483424627	GTEX
GTEX-ZAK1-0226-SM-5CVMX	515.65593522357	1314.6117798505	431.475937500524	398.384368863746	1410.11567717115	1708.05906495731	GTEX
GTEX-ZC5H-0126-SM-4WAYL	508.794642802939	1231.18399299786	381.07796335916	414.246212752688	1473.47641260473	1800.56819763727	GTEX
GTEX-ZDTS-0226-SM-5HL7Q	616.187316857019	1269.50359684247	388.579192289565	386.276577126932	1610.55059437298	1404.09547199021	GTEX
GTEX-ZDTT-2626-SM-5S2OP	548.355527109709	1214.41390452165	407.194299623597	364.167193288371	1359.71663208678	1823.91821692021	GTEX
GTEX-ZDXO-2426-SM-5S2NJ	556.584153230117	1184.36608653411	544.237147158227	374.252636046474	1594.5319498127	1476.28245508264	GTEX
GTEX-ZDYS-2126-SM-5S2OD	653.400433488217	1267.85305561856	334.733442568527	414.717572349778	1511.35967749831	1504.39450508798	GTEX
GTEX-ZE7O-0226-SM-5S2N1	518.172526233013	1397.29418463584	290.731407204729	378.00384061297	1440.87536479049	1737.17075900906	GTEX
GTEX-ZE9C-2826-SM-5S2MO	592.587357980603	1350.92856261724	351.710227154769	409.708192331965	1450.26151694651	1533.01598589396	GTEX
GTEX-ZEX8-2326-SM-5S2MN	511.28805900935	1242.504227376	313.300788758697	414.501871471265	1571.49668447577	1719.49755186104	GTEX
GTEX-ZF28-0226-SM-5S2OE	566.485397081928	1308.07152649734	286.429845353197	381.790224538682	1465.29126823465	1703.44949563494	GTEX
GTEX-ZF29-2226-SM-4WWB9	499.107097472126	1204.16694284488	469.415148980267	380.989617809713	1473.18316227669	1798.73288098829	GTEX
GTEX-ZF3C-0226-SM-4WWB3	347.956157837668	1285.51676709773	408.286346713826	354.504513391854	1421.07489264523	2123.40929626298	GTEX
GTEX-ZLV1-1826-SM-5FQU5	491.263443318951	1306.38420297216	458.401319032509	385.413577454141	1372.964611221	1760.25122124593	GTEX
GTEX-ZLWG-2226-SM-5DUWO	578.098293288372	1276.81814681999	457.657018582014	403.733891688051	1426.09163332043	1620.70326477531	GTEX
GTEX-ZP4G-2326-SM-57WEM	520.436482028655	1205.90411433765	492.77504520115	373.94457416736	1409.2435679501	1719.83685296351	GTEX
GTEX-ZPCL-2126-SM-57WFZ	499.949839396747	1186.16911913081	478.617405585728	369.91715179931	1388.50995580086	1833.14634294131	GTEX
GTEX-ZPIC-1826-SM-57WFE	536.570236672202	1163.37793107728	460.793372674198	402.628385575608	1445.56366367863	1749.13812229231	GTEX
GTEX-ZPU1-2426-SM-4WWFM	644.940093417981	1198.40670348356	428.727375971408	448.410698398219	1536.1747245798	1484.5951244309	GTEX
GTEX-ZQG8-1526-SM-5HL65	556.998645471295	1261.72779860952	440.388212901412	403.908473560562	1311.40630420678	1786.65647277662	GTEX
GTEX-ZT9X-1926-SM-57WE7	545.377515232986	1218.58284130511	436.399503775111	414.428158736764	1428.26904569742	1746.63101143897	GTEX
GTEX-ZTPG-0226-SM-5O99I	456.197768372289	1265.42002935613	418.050962258301	349.26551224298	1299.59770048298	2041.40115568522	GTEX
GTEX-ZTSS-2026-SM-5987K	415.380453542877	1208.23834712224	892.740182450703	348.339478823793	1319.74273143278	1560.55001692693	GTEX
GTEX-ZTX8-1526-SM-5N9GI	499.395656592543	1345.50448529814	516.172110360788	382.531819045481	1404.6427048044	1621.20304010857	GTEX
GTEX-ZUA1-0226-SM-5NQ9Q	566.052932638478	1307.61370148268	440.839658658974	395.134416085562	1467.71142788314	1548.14196917381	GTEX
GTEX-ZV68-0226-SM-59HJF	471.72135991138	1347.93594164416	397.510305378577	362.768738799219	1487.51904935108	1742.93486997157	GTEX
GTEX-ZVE2-0326-SM-57WFC	430.524462597836	1242.72113818767	550.81614159098	406.23593242911	1430.8276880089	1730.59543692554	GTEX
GTEX-ZVP2-1826-SM-5GU62	510.436654618537	1240.86248719159	459.25198633548	347.451269816092	1488.08694643435	1713.19316175723	GTEX
GTEX-ZVT2-2226-SM-5NQ6P	525.129215963017	1297.32732487777	417.109011545056	409.209462854159	1402.35187825311	1701.69497903142	GTEX
GTEX-ZVT4-0226-SM-51MSD	523.437678890463	1148.8540287028	380.936442103746	374.375136509625	1545.23657551644	1828.86225492385	GTEX
GTEX-ZVTK-0526-SM-5GZWT	638.957484569405	1341.47294215545	433.387562172406	414.149487222704	1476.15076512395	1316.2544251026	GTEX
GTEX-ZVZO-0226-SM-5A5LA	452.896706853861	1206.08237022414	367.08768602952	339.266709404571	1486.37991464359	1996.52683866675	GTEX
GTEX-ZVZP-2326-SM-59HL4	596.943914976257	1270.34938812154	447.062522363611	389.400104521783	1444.07795723916	1607.21098665433	GTEX
GTEX-ZXES-2026-SM-5NQ6R	588.454180930654	1295.86443384173	369.170450579996	435.009526268569	1311.28518714934	1718.35817863529	GTEX
GTEX-ZXG5-0226-SM-59HJI	521.931095484621	1256.83435679217	374.746954000234	365.857380645679	1560.10693069113	1715.81788620657	GTEX
GTEX-ZYFC-0326-SM-5NQ7H	664.09540352227	1350.3068396894	288.228917070609	417.872975548981	1520.17284961314	1442.82441131272	GTEX
GTEX-ZYFD-0226-SM-5NQ86	653.433902665621	1241.86572256556	351.140859140587	333.223091846703	1532.7350812143	1569.82878958037	GTEX
GTEX-ZYVF-0226-SM-5GIEG	475.900647736201	1269.24619724868	451.267130317406	364.975756050631	1459.97591140881	1772.43616842402	GTEX
GTEX-ZYW4-0226-SM-5E44M	545.651878145747	1237.51170898138	409.127149867127	362.338825752451	1581.65549123702	1603.19149954822	GTEX
GTEX-ZYWO-2526-SM-5GIDM	507.897166736628	1226.78922491376	459.16123756438	391.867178080723	1395.99862028603	1822.59644249228	GTEX
GTEX-ZYY3-0226-SM-5E45M	508.587272071779	1291.40839901593	471.582527175216	441.250483457955	1365.74176548964	1722.51259203822	GTEX
GTEX-ZZ64-1626-SM-5E43W	528.755576233846	1314.17723599765	537.453209864857	396.451600425127	1379.60306706443	1546.52034073274	GTEX
GTEX-ZZPU-2726-SM-5NQ8O	485.751124624591	1247.76403167938	368.533365428391	397.820127719796	1432.08178326274	1890.1867815905	GTEX
GTEX-1117F-1326-SM-5EGHH	429.378763706577	1311.48897645391	496.00392222697	297.832055879016	1371.10508545655	1929.22081424984	GTEX
GTEX-111CU-1026-SM-5EGIL	465.714841573109	1221.99238447784	482.087853088891	345.494122913234	1368.81548307009	1939.59982183588	GTEX
GTEX-111YS-1326-SM-5EGGK	411.388987720474	1201.81325350054	646.270032502662	317.389355449427	1339.62897223935	1861.00182326872	GTEX
GTEX-1122O-0926-SM-5N9C9	600.600862815079	1224.90977780795	399.505434326515	365.556786389514	1248.48180714676	1883.68126647533	GTEX
GTEX-1128S-0926-SM-5GZZU	424.524365892292	1335.5863470022	408.402098862651	304.89617899051	1485.7012371764	1895.61019068764	GTEX
GTEX-113JC-0726-SM-5GZZR	507.871463970997	1213.43647191953	542.596965213565	316.850022444781	1469.78343500055	1732.70895468947	GTEX
GTEX-117YW-0826-SM-5H11O	415.130056503606	1191.19736050286	576.070730903301	333.401740211463	1411.57893519825	1904.92085593723	GTEX
GTEX-117YX-0726-SM-5GIET	460.111800369081	1054.27984242686	674.338321344603	336.137295957017	1405.84442670377	1878.75127321238	GTEX
GTEX-1192X-1526-SM-5H11I	452.551146661026	1328.89448656355	454.601289930464	328.471177940138	1389.10262967935	1914.33930709981	GTEX
GTEX-11DXX-2026-SM-5EGJL	595.790110944548	1191.56678808673	501.758388009441	349.457837585511	1483.29956977034	1643.76115020096	GTEX
GTEX-11DXY-0326-SM-5H12F	525.987982326204	1164.92931508487	605.515065709266	273.257258446405	1471.53452585771	1673.36255061274	GTEX
GTEX-11DXZ-1426-SM-5H12A	516.624805367789	1291.86956717332	424.460849512602	310.167254737669	1505.08747565475	1754.63232687728	GTEX
GTEX-11DYG-2026-SM-5EGGX	527.483971656397	1215.80145314549	667.381438417418	258.012209416254	1431.07008007084	1587.88923468369	GTEX
GTEX-11EM3-1126-SM-5A5KM	375.689492048291	1105.26284803481	550.465941645008	237.14073654406	1297.7173737881	2386.3606007584	GTEX
GTEX-11EQ9-1126-SM-5987I	493.285121702933	1184.04086389563	467.616670087362	300.924586416894	1279.37211862945	2090.07979951204	GTEX
GTEX-11GS4-1026-SM-5N9DE	549.485731178273	1320.42461631928	346.655491748618	308.340116030094	1418.64320630169	1820.95873592827	GTEX
GTEX-11GSO-0226-SM-5A5LV	461.105485330393	1167.75495737007	620.158088599515	293.947043744715	1402.34278125837	1812.98598127634	GTEX
GTEX-11I78-0226-SM-5HL6R	507.028740992707	1120.91326453005	478.097250822825	297.905752428301	1376.38022658641	2081.83598206307	GTEX
GTEX-11LCK-0326-SM-5A5M7	390.716779785512	1201.4638345371	455.437557736031	299.191848995414	1353.57590298977	2192.95826505633	GTEX
GTEX-11NUK-2026-SM-5PNVZ	607.760952897703	1254.73942458242	563.947697766673	310.785090334542	1457.60384826677	1494.79278826762	GTEX
GTEX-11NV4-1426-SM-5BC4W	570.609447235161	1239.98051402386	640.874055310581	262.191615707599	1404.75795650557	1524.66412805669	GTEX
GTEX-11OF3-0826-SM-5BC51	592.342585151544	1265.6782498622	535.223713058974	286.06771590641	1443.75075375304	1557.8640247315	GTEX
GTEX-11P7K-0826-SM-5BC5F	520.917012085508	1269.98250198541	532.449752311567	328.63798229599	1386.24739794291	1776.91463291847	GTEX
GTEX-11P81-0726-SM-5PNYH	475.79936762484	1205.50533591622	475.894764084249	308.291693734808	1390.36884980944	1977.62809393159	GTEX
GTEX-11P82-0326-SM-5HL51	510.857873104947	1143.45443539943	509.519680255325	283.586132235723	1376.33313875282	1993.66835172189	GTEX
GTEX-11PRG-1526-SM-5HL6Z	523.799137621301	1275.20813379462	479.600414358503	325.532465140409	1474.09402101301	1713.40577365965	GTEX
GTEX-11VI4-1226-SM-5EQMP	511.031478810418	1308.7310618757	419.28509990751	356.62289744483	1355.57054869418	1932.76505525449	GTEX
GTEX-11WQK-1526-SM-5EGKN	522.80229906755	1199.464012019	637.221111804171	333.062914732293	1384.96935825912	1661.17958657584	GTEX
GTEX-11XUK-1726-SM-5GU61	504.754020288559	1208.56190989082	552.417711792594	373.007809423993	1366.24462264133	1807.01448890685	GTEX
GTEX-11ZTS-1326-SM-5EQMA	488.326378913107	1233.35060499724	467.945335832064	334.608417652098	1568.11444495775	1655.7433396028	GTEX
GTEX-11ZUS-1826-SM-5FQTR	595.033963852467	1260.25053123997	520.379645007926	343.416017201054	1533.9132829779	1436.2580234409	GTEX
GTEX-1211K-1226-SM-5EQ4N	491.230527901854	1208.94563235769	554.016354789311	347.53628493563	1427.69651139659	1786.59648648515	GTEX
GTEX-1212Z-0526-SM-5FQSQ	570.816004009808	1087.9809492066	692.456013174268	250.972810262687	1504.46412536856	1558.69155289277	GTEX
GTEX-12584-2126-SM-5FQUM	424.304771470083	1376.43877244001	457.849124642066	351.606708321895	1323.78650801661	1945.02523919686	GTEX
GTEX-12696-1826-SM-5EGJS	572.502496134594	1218.08925271697	574.634010259264	353.350388318968	1403.25984988547	1628.66432479361	GTEX
GTEX-12BJ1-0826-SM-5EQ5P	497.566971265333	1363.69424434606	399.404601624298	290.238275801385	1378.22176489247	1894.45740869615	GTEX
GTEX-12C56-0826-SM-5EGJ5	537.925162095252	1179.30175633592	481.246019868016	363.897997921205	1377.81405248847	1879.91004407054	GTEX
GTEX-12KS4-1526-SM-5EQ6E	496.56003663535	1210.39599290645	623.780241365464	298.051984084822	1463.86492093122	1626.9809326216	GTEX
GTEX-12WSA-1626-SM-5EGJV	546.348167048388	1337.28644658325	488.56667916574	328.815711930179	1318.68539008332	1810.20614997755	GTEX
GTEX-12WSC-1726-SM-5GCN3	586.756459244026	1110.18928842523	685.175767614804	301.613686846814	1432.66520295785	1522.2383247802	GTEX
GTEX-12WSG-0426-SM-5FQSE	475.140245704336	1231.59410778842	412.688967836176	332.654054138429	1460.47939684474	1922.90194780082	GTEX
GTEX-12WSI-1526-SM-5GCNM	618.03314233252	1182.41085752233	480.638430023937	307.421476699837	1419.61228564393	1785.24259433409	GTEX
GTEX-12WSK-1026-SM-5CVNR	401.143610498772	1201.15190790908	578.278545892596	243.908091497948	1383.85583196618	2036.38693343211	GTEX
GTEX-12WSL-1126-SM-5CVNK	473.361473549677	1243.98408111765	548.000350385064	315.752516028413	1419.17442220381	1794.01127973913	GTEX
GTEX-12WSM-0626-SM-5GCOK	503.796478659103	1184.81751828391	651.779689981439	280.01470589829	1382.78957910924	1710.55333152589	GTEX
GTEX-12ZZW-2326-SM-5DUW2	496.933349539528	1113.3930070529	636.79022864278	290.7247280841	1380.14280468931	1832.13485211666	GTEX
GTEX-12ZZX-1726-SM-5BC63	639.171588940775	1358.25320096763	460.083893645324	370.208949298142	1409.81277909762	1431.21763312407	GTEX
GTEX-13111-0626-SM-5LZVR	510.495394563923	1217.27378298543	383.382929346685	307.463625366818	1280.3841443218	2180.19576193482	GTEX
GTEX-13112-1126-SM-5GCMY	625.202266377304	1256.27514186895	580.300635889496	305.703454682227	1428.12571220268	1434.50336932455	GTEX
GTEX-13113-1126-SM-5LZU9	477.884167163633	1224.42775838653	447.061271716798	335.714507843347	1387.89950877933	1995.26330804482	GTEX
GTEX-1313W-1626-SM-5J1OE	559.201172735496	1362.51806823444	412.158448649365	300.563603588389	1426.16656223597	1668.93716023895	GTEX
GTEX-131XE-2026-SM-5LZW1	517.245758320712	1292.69755182631	418.016790330255	323.808511453796	1469.2060973637	1766.59889266119	GTEX
GTEX-131XF-0726-SM-5GIE5	438.559737552517	1224.3079780419	622.57934337483	292.947737883408	1367.95231489505	1841.28403771318	GTEX
GTEX-131XG-0126-SM-5K7UJ	502.40838135561	1192.229957369	402.752273159093	360.755255079668	1340.21299327756	2068.1051136519	GTEX
GTEX-131XH-0826-SM-5GCN8	529.00083593007	1215.14358923594	589.158450016438	313.496103513101	1446.52956523016	1616.64651917668	GTEX
GTEX-131YS-1726-SM-5HL7G	627.707631977627	1222.09890310789	650.835196993013	294.363803699321	1464.46067514927	1326.01599886006	GTEX
GTEX-132AR-0526-SM-5J2MJ	422.401668802038	1175.75093024224	494.545253872001	311.643891549115	1415.12384542549	2048.64093845847	GTEX
GTEX-132NY-1126-SM-5PNVE	655.336693965382	1137.49195601178	544.496132989033	302.030942127727	1470.36334306276	1572.38395328698	GTEX
GTEX-132Q8-1726-SM-5EGK8	458.97070936981	1275.96728531648	431.097343250367	280.396591555157	1321.53340620399	2120.62672346763	GTEX
GTEX-132QS-0826-SM-5K7WV	489.624147547769	1205.88029635643	560.980566765781	267.355020967583	1337.50921871547	1971.21489230878	GTEX
GTEX-1339X-0726-SM-5L3FF	562.23436243802	1091.2946790482	677.381235627452	345.927713258372	1328.17982715008	1707.35862854168	GTEX
GTEX-133LE-0926-SM-5P9J1	474.681256072013	1062.25213999062	616.993742318698	276.817706436398	1427.77448917173	1961.70654247804	GTEX
GTEX-1399S-1426-SM-5PNYQ	551.14798557661	1111.68621678268	435.327485644026	326.945053045344	1393.98849804174	2017.41331201779	GTEX
GTEX-1399T-1326-SM-5PNVH	580.474632613	1268.43901557515	479.556098827896	308.062000196386	1536.09906341606	1566.42333224433	GTEX
GTEX-139D8-1626-SM-5IJFZ	503.948754759785	1152.39813780638	620.459503885135	283.924486469007	1434.01438066724	1728.23066585886	GTEX
GTEX-139T6-0526-SM-5IJC9	423.271369830537	1335.91857468499	556.366496471727	295.918581985642	1267.0236937395	1997.43647869148	GTEX
GTEX-139TU-1426-SM-5LZY9	436.825433029763	1095.80937266094	822.74663091676	235.783706101183	1344.57793841652	1785.74490269837	GTEX
GTEX-139YR-0326-SM-5J1MC	495.287750141856	1271.99827775969	387.65683995578	391.961311514355	1369.50794633933	1933.69274333163	GTEX
GTEX-13CF3-1126-SM-5LZXB	484.668140199046	1265.61572201759	561.43271326526	325.626680997829	1330.94273530127	1840.7872336969	GTEX
GTEX-13D11-0526-SM-5LZYM	492.778537968495	1183.20834733041	584.332727641706	264.729230844164	1325.6045920945	1994.8861128844	GTEX
GTEX-13FH7-1926-SM-5J2OL	542.980767889751	1309.82965230478	513.212430097202	370.615930670547	1411.47569982423	1597.41807215851	GTEX
GTEX-13FHO-2026-SM-5J1OA	443.955076584767	1152.55318449265	373.336012972946	315.963974942048	1446.84437819248	2137.41035205877	GTEX
GTEX-13FTW-0426-SM-5K7X2	466.840976340002	1130.68964916184	463.898980960502	352.555835637214	1393.52090496358	2076.81091789831	GTEX
GTEX-13FTX-0626-SM-5J2NS	411.228543546798	1140.50000391877	764.142357406743	260.808644329222	1334.19000294085	1865.81459548792	GTEX
GTEX-13G51-0526-SM-5IJCQ	654.98864534387	1155.1543380963	612.981377212451	283.004506826896	1496.64150429662	1362.22303601382	GTEX
GTEX-13IVO-2426-SM-5K7V9	566.513536924343	1290.01794245078	575.604297792202	347.899215496318	1403.17772459452	1485.67864402318	GTEX
GTEX-13JUV-0626-SM-5J1MQ	524.114763689907	1450.07464366821	424.614627760309	334.634261223671	1360.4596410677	1643.11910344822	GTEX
GTEX-13N11-1826-SM-5IJDS	487.555822272783	1255.13760911848	333.825592125536	306.615839371802	1398.71947277329	2116.97023117663	GTEX
GTEX-13N1W-1226-SM-5K7UM	503.525126129723	1011.97384881096	712.235786233237	248.350012774831	1455.32082213049	1727.13082657885	GTEX
GTEX-13N2G-1926-SM-5J1O3	499.72005035912	1347.459748478	433.758830082021	328.013275366676	1393.52921580444	1778.22902721846	GTEX
GTEX-13NYS-0726-SM-5J1OR	510.282775171412	1429.33902105897	420.373237719162	335.095776301407	1324.98871170209	1771.27502780333	GTEX
GTEX-13NZ9-2026-SM-5KM1U	547.410260257964	1194.88455192809	572.124345106794	285.85963280602	1472.63220885389	1615.41423894943	GTEX
GTEX-13NZB-0826-SM-5K7X5	585.355244826096	1283.71153539212	586.205838443798	320.424924075459	1425.86387734476	1468.52952846585	GTEX
GTEX-13O21-3126-SM-5J1OI	402.935194542364	1225.98449062299	455.564070408193	317.878958625979	1294.91523205164	2178.06772361551	GTEX
GTEX-13O3P-0926-SM-5IFFI	409.331410887387	1097.76065128688	648.005161050909	239.856528100483	1361.4675987852	2045.21781745855	GTEX
GTEX-13O3Q-1126-SM-5K7YK	645.662399156734	1220.81568987465	600.89358899531	269.897707331035	1484.79120366739	1360.26371904331	GTEX
GTEX-13O61-1926-SM-5KM1R	410.076845809992	1251.64166600003	479.387059092118	286.931560724735	1226.24023898836	2266.09436228116	GTEX
GTEX-13OVG-1326-SM-5K7Y3	476.056523637278	1228.72261318753	556.830148204413	279.535835662	1362.03604675797	1867.56105803546	GTEX
GTEX-13OVH-1126-SM-5K7YP	397.982618522596	1132.34050888814	689.740196264174	191.781223777782	1420.84376461326	1960.96361153789	GTEX
GTEX-13OVJ-0926-SM-5K7U1	486.913834557219	1241.8324332567	385.762010261744	366.470810169259	1389.98835471211	1960.04941980747	GTEX
GTEX-13OVL-0826-SM-5L3GV	547.002708894434	1245.65179706489	544.097457823742	302.807369737563	1401.15782879201	1713.90827951348	GTEX
GTEX-13OW6-2426-SM-5K7WO	591.278494082498	1167.04866943744	539.305418220785	326.443406275248	1540.63956464625	1512.41775030202	GTEX
GTEX-13OW7-1126-SM-5K7V6	644.730654776417	1214.36697301506	439.888289716637	308.345373176249	1623.08278705018	1411.78385769687	GTEX
GTEX-13OW8-0326-SM-5L3FB	567.430352307923	1370.57630633628	477.355891693417	313.671749880517	1449.04093740837	1546.9359973037	GTEX
GTEX-13PDP-1226-SM-5K7TW	563.301139007421	1351.48976082179	533.416751255048	332.511703214767	1337.47976149831	1593.32799883872	GTEX
GTEX-13PL6-0926-SM-5KLYY	556.712910366831	1226.54626344227	558.747224462751	284.230054910093	1485.93116143207	1568.48079218796	GTEX
GTEX-13PL7-1226-SM-5SIAR	383.805889585302	1092.34949274671	462.183497838689	342.757957605415	1353.94147869358	2289.2097925094	GTEX
GTEX-13PVQ-2226-SM-5L3G9	517.561707853029	1175.67945317305	546.870222732539	282.010232915555	1458.60506547617	1802.84446509855	GTEX
GTEX-13PVR-0526-SM-5S2OB	455.461778296614	1162.22894531932	630.603817919292	281.588717020494	1333.91356819936	1941.37137010391	GTEX
GTEX-13QBU-1326-SM-5LU4K	436.027270010635	1077.2594921082	636.754802586507	280.241876914819	1395.17600748628	1991.61177747141	GTEX
GTEX-13RTK-0726-SM-5Q5EN	427.801742489092	1076.44866475162	643.372664679675	324.91841348829	1320.86013568779	2069.53229942642	GTEX
GTEX-13S7M-0826-SM-5QGQX	486.149314772185	1130.06231905599	639.043884692085	261.776421570961	1378.33984461622	1838.0056134511	GTEX
GTEX-13S86-0926-SM-5SI6I	484.949424491125	1358.80818421099	433.528594827207	318.779806724459	1398.45492625042	1859.00759609044	GTEX
GTEX-13U4I-1726-SM-5J1MF	452.237615565132	1134.98287818224	562.236511260742	285.165503334277	1434.70707441637	1972.06506346423	GTEX
GTEX-13VXT-0926-SM-5LU5K	429.483102618411	1092.89331220847	592.085808222368	279.130294861868	1389.43767777089	2056.56228363838	GTEX
GTEX-13VXU-1026-SM-5KLZE	606.981575314685	1353.97376551394	465.113097253139	303.64570070951	1501.22664437657	1449.68679363016	GTEX
GTEX-13W3W-1126-SM-5L3DO	504.49607306962	1191.47428251029	573.740017707616	300.351652551076	1455.96022605845	1783.17170005364	GTEX
GTEX-13W46-1226-SM-5SIAS	509.826077022826	1226.15423999252	621.55257603465	291.865648818635	1463.79992275623	1571.47112399551	GTEX
GTEX-13X6H-1726-SM-5Q5EH	432.605701725501	981.965879637287	617.671730808251	253.066059612276	1424.40697379451	2127.34901891477	GTEX
GTEX-13X6I-1526-SM-5SIAC	408.453256151808	1178.62077142576	482.894884556851	295.724053045295	1461.6149887418	2045.67772538536	GTEX
GTEX-13X6K-0726-SM-5LU2Z	457.414292599969	1372.22956283721	386.716696902657	335.351328308523	1434.237765992	1859.7873107598	GTEX
GTEX-144GN-0726-SM-5O98O	473.39244361297	1163.29504803062	612.261036833412	293.239188489803	1406.87833119317	1836.6850591109	GTEX
GTEX-145LT-1526-SM-5O98P	484.480840779536	1253.02755465178	611.887858362195	283.56430254836	1310.13905273372	1816.29205693461	GTEX
GTEX-145LU-1226-SM-5LU9B	528.280850571345	1237.13847273519	575.586635461045	284.09268359055	1462.38787458487	1630.36424036612	GTEX
GTEX-145LV-1026-SM-5O9AE	579.012982303816	1131.70193206889	665.312488538633	359.033178192341	1368.9790594833	1541.84684439223	GTEX
GTEX-145ME-0726-SM-5O9A3	473.23940695347	1185.99265800119	613.460737129858	256.498429055544	1351.14928956158	1907.12649187359	GTEX
GTEX-145MF-1026-SM-5Q5EQ	681.424210486554	1263.64786664145	343.835648782955	377.384042454908	1501.98297242072	1526.93759723229	GTEX
GTEX-145MI-0826-SM-5SI95	495.840841389701	1316.43466859456	517.021061085633	295.725331573047	1400.44366397668	1794.86158924852	GTEX
GTEX-146FH-2026-SM-5SI9I	439.228110890944	1196.53235206368	491.734967304925	311.488395903152	1484.91422780316	1873.34473931954	GTEX
GTEX-146FR-0226-SM-5Q5F6	344.162138467342	1219.52367340292	612.980034004692	280.936670707484	1268.88587513648	2208.37940752288	GTEX
GTEX-14753-2526-SM-5LU97	500.959946279582	1163.91129754882	660.777436104396	265.946596270657	1461.70718941729	1662.21679673755	GTEX
GTEX-147JS-1026-SM-5S2MP	567.827976596485	1133.63797794717	568.582059262591	249.922401321152	1490.41511982364	1692.91887336438	GTEX
GTEX-14A6H-1026-SM-5SIAZ	456.65957000892	1330.66074379782	488.959705799899	308.958633598913	1270.82301270721	2047.34597622409	GTEX
GTEX-14AS3-0426-SM-5QGQK	625.005992896665	1341.86209471453	504.282202509951	391.470367965796	1426.3741252713	1383.57229532603	GTEX
GTEX-14B4R-0526-SM-5QGQT	391.556446380268	1110.42519277307	645.158174380519	247.530871911915	1310.52241727264	2175.11373676685	GTEX
GTEX-14BIL-2426-SM-5QGQR	432.57691436978	1249.82774353388	519.504572505473	273.388954104685	1415.54916633433	1928.2082552704	GTEX
GTEX-14BIN-1226-SM-5S2OM	530.634298740982	1234.41855419321	566.209418206854	268.893043067331	1431.21627219994	1670.60538275505	GTEX
GTEX-14DAQ-2526-SM-5RQIO	576.156941389628	1160.75942511188	565.51352781568	303.164090447132	1496.96147758586	1541.06583646871	GTEX
GTEX-14E1K-0426-SM-5S2PF	544.630370781234	1231.35964589215	537.767259230453	318.934821838131	1401.7561373207	1691.70967890247	GTEX
GTEX-14ICL-0926-SM-5S2TU	544.490057533702	1414.93016871125	504.82164722203	316.804351320224	1308.89271488169	1697.89525483164	GTEX
GTEX-U8XE-1926-SM-3DB98	482.381631746669	1237.10470589155	423.462449749555	318.121265587986	1313.82221045256	2032.52746265785	GTEX
GTEX-UPK5-1826-SM-3GAEB	483.664090452401	1246.73797286218	276.393012478089	323.088693042219	1557.05250416598	1948.17930540329	GTEX
GTEX-VUSG-1426-SM-3GIJN	659.93102214391	1238.69781556463	382.667541139163	396.275407659852	1434.00176833561	1565.68467108305	GTEX
GTEX-W5X1-1426-SM-3GIKH	549.20947696478	1205.06882839983	361.983724791233	364.19708876423	1346.74497068886	1943.70505697211	GTEX
GTEX-WEY5-1326-SM-3GILS	511.539350498565	1087.98871605706	561.539287468466	306.025397702999	1460.74033625949	1801.61867910729	GTEX
GTEX-WFJO-1026-SM-3GIKL	486.39579814452	1239.55477860582	302.478903928978	347.554421078835	1339.09210899136	2170.26737602287	GTEX
GTEX-WFON-1226-SM-3TW8F	483.088451406634	1145.03962095682	662.79265423449	280.901749198898	1383.61687774559	1834.95477714627	GTEX
GTEX-WH7G-1126-SM-3NMBK	465.719720600299	1235.72037170666	467.470342406168	341.316743447675	1383.54165168836	1954.51748364475	GTEX
GTEX-WHPG-0626-SM-3NMBD	442.551288609834	1180.15215366397	542.612621144576	309.214421247017	1363.4631958676	2048.77723644169	GTEX
GTEX-WHWD-0826-SM-3LK6R	585.696256878272	1205.55985240568	634.289790126684	337.053501712335	1411.24188646606	1491.33194554387	GTEX
GTEX-WK11-2426-SM-3NMAA	596.815303151619	1351.72935709997	412.904380001087	346.337663415163	1472.51833432395	1554.38578047501	GTEX
GTEX-WL46-2026-SM-3LK7U	678.563657475357	1340.01171208456	344.155713820815	315.572739190441	1510.69319343323	1460.47297477587	GTEX
GTEX-WOFM-0726-SM-3MJF8	568.659001285429	1133.20156776109	360.288126179249	349.307906778353	1544.79519944979	1867.37106471008	GTEX
GTEX-WRHK-0826-SM-3MJFG	601.453307590543	1173.68463676734	422.848789392745	380.166822037152	1590.69971616057	1565.93075633026	GTEX
GTEX-WWTW-1326-SM-4MVNT	519.468433188145	1285.84245540207	404.360509451758	314.031055137665	1280.06480260327	2024.3500268951	GTEX
GTEX-WXYG-0926-SM-3NB2O	520.09759805191	1254.77880440791	451.554569910573	294.835647595976	1490.73298833681	1770.47085669114	GTEX
GTEX-WY7C-0926-SM-3NB34	431.333926708777	1226.73242579534	637.998535030295	290.680918122621	1379.21172782862	1841.12423345398	GTEX
GTEX-WYJK-1426-SM-3NM8V	464.799432930949	1249.73876673846	556.904473116082	346.921035215832	1367.46627314815	1802.0772011607	GTEX
GTEX-WYVS-0626-SM-4SOJY	566.303160319256	1266.97122520229	603.010627483711	309.073977525009	1456.12315437722	1469.2025166613	GTEX
GTEX-X3Y1-0926-SM-3P5YT	477.94002070828	1163.04755363835	567.767716699354	276.20160694832	1349.99087888357	1988.4009038916	GTEX
GTEX-X585-2526-SM-4QAS1	613.1104034085	1321.2739819844	424.400443716855	385.909095201691	1480.79067667238	1456.27313533776	GTEX
GTEX-X8HC-2326-SM-4QAS4	438.778564238269	1259.09214941986	615.887330507511	243.927955187975	1436.10564519076	1769.45876084887	GTEX
GTEX-XAJ8-0226-SM-4GIB2	499.491589742731	1217.17675371295	559.078812540983	314.373498782302	1374.20638215997	1787.92035774809	GTEX
GTEX-XBEC-1826-SM-4QASN	496.14887996724	1187.94433712191	669.094186017908	277.053698470184	1409.36757942024	1662.04153255423	GTEX
GTEX-XBED-1326-SM-4AT4F	436.757944199182	1204.77867200339	401.317371994362	320.529423588271	1273.4793487358	2322.95894350529	GTEX
GTEX-XBEW-1726-SM-4RGMA	526.574166190017	1206.54741840084	634.620973491257	309.198405732095	1363.49207610205	1710.95094315924	GTEX
GTEX-XGQ4-1026-SM-4AT4L	476.375278343355	1169.79580141229	608.273214064872	257.72276229731	1331.83460690367	2002.95341865256	GTEX
GTEX-XLM4-1026-SM-4AT51	501.187580113785	1076.07760421401	699.061794969288	295.445398268398	1392.98074126825	1784.12020759534	GTEX
GTEX-XMK1-0926-SM-4B66X	543.153646181082	1286.98867018129	426.437057188746	361.884476906458	1381.47311893602	1800.94834974054	GTEX
GTEX-XOT4-0826-SM-4B66Y	565.107342514683	1123.23670715432	636.283686985364	323.33813043188	1542.60993013194	1445.36567485226	GTEX
GTEX-XQ8I-1426-SM-4BOPW	493.954038203875	1298.34511594135	623.414684638492	269.72391447198	1309.8336497123	1735.24967247722	GTEX
GTEX-XUJ4-1726-SM-4BONW	436.335808547678	1305.48959880164	382.183998670446	273.876430936221	1279.89009335116	2182.42678014887	GTEX
GTEX-XUZC-1126-SM-4BOPZ	472.170389905326	1212.82327714003	469.06261544518	337.214505033272	1486.33375894519	1828.05804977657	GTEX
GTEX-XV7Q-1726-SM-4BRUU	535.602202301474	1153.29711152559	585.658628596076	354.111798744058	1430.10815251155	1647.89393177748	GTEX
GTEX-XXEK-1426-SM-4BRW1	518.853952044005	1186.51819744399	642.837554318616	316.778567458946	1451.94013792783	1570.62398506854	GTEX
GTEX-XYKS-1826-SM-4E3JV	410.670161524694	1110.82095014326	435.171968185949	327.451297867781	1410.60113131536	2213.20342807903	GTEX
GTEX-Y111-0926-SM-4SOIU	626.632213511424	1220.37269159589	455.36181659001	328.676121927889	1470.78285118284	1626.7001611446	GTEX
GTEX-Y114-1326-SM-4TT9A	410.836463022476	1107.43986836927	652.677442868039	284.420067759493	1346.79644721512	2055.79546002862	GTEX
GTEX-Y3I4-0726-SM-4TT7M	359.146756975806	1174.21537274885	637.208136195994	287.366390338206	1313.44071892705	2085.77321515212	GTEX
GTEX-Y5LM-0826-SM-4VDSW	485.147318226729	1188.81605149287	492.899868109653	376.66483849615	1441.60593424738	1820.3898638682	GTEX
GTEX-Y5V5-0226-SM-5S2N8	498.939308031144	1271.69754166297	440.453376075399	372.366391270895	1401.44381488304	1800.18934821895	GTEX
GTEX-Y5V6-0626-SM-4WWFY	436.680412406527	1204.20105071932	673.948667386298	254.138270707893	1342.7521145071	1870.05269466986	GTEX
GTEX-Y8E4-1226-SM-5IFIM	539.875064024691	1260.00742218988	610.598275710743	303.994992120735	1379.247219775	1598.63057943224	GTEX
GTEX-Y8LW-0926-SM-4VBQ8	453.470338238719	1222.24168588704	484.737944354436	359.720982740402	1399.84888971987	1911.29439104882	GTEX
GTEX-Y9LG-1226-SM-4VBQA	450.73230483674	1096.82317264565	388.606168582499	276.69019896738	1309.00080302646	2463.30126656938	GTEX
GTEX-YEC3-0926-SM-5Q5AC	428.724903569467	1259.34677000945	644.522811765305	302.904199440798	1313.02107802929	1866.18968093198	GTEX
GTEX-YEC4-0926-SM-5PNXY	472.721756423529	1225.467343611	508.598649352476	272.175000741358	1243.71178728503	2175.8026448634	GTEX
GTEX-YECK-1426-SM-5IFHE	562.837123751772	1251.5546700906	456.439135193006	283.299531146255	1581.8057268804	1557.66505200348	GTEX
GTEX-YFCO-1126-SM-5S2N9	527.998001971012	1215.34709932295	560.874800337994	341.894753889238	1410.04831810537	1720.19303305843	GTEX
GTEX-YJ89-1926-SM-5IFJ6	543.932739065565	1235.71790564187	488.657894161451	289.119195271299	1515.02867426248	1625.32341703362	GTEX
GTEX-Z9EW-0826-SM-5HL9T	452.150392872923	1185.99774249756	477.305148898353	295.869145521669	1342.84096627793	2111.24836885313	GTEX
GTEX-ZA64-0926-SM-5HL7H	517.978393590329	1135.09735984553	483.939678295608	329.384973432774	1302.52452807773	2098.01419391516	GTEX
GTEX-ZAB5-1126-SM-5Q5AD	520.818420900731	1291.05707014425	573.503184638312	324.180954513593	1444.72773775504	1575.42029400606	GTEX
GTEX-ZAJG-1626-SM-5HL7I	443.712903262858	1121.18556794437	647.498975947029	328.274299575452	1369.65600204154	1895.02158961702	GTEX
GTEX-ZC5H-1626-SM-5HL7L	496.908505768318	1244.44438205543	396.944000644234	315.693660857003	1478.40025366688	1897.93793574826	GTEX
GTEX-ZDTS-1826-SM-5S2N6	587.698059906346	1245.32437606936	536.655383584438	292.316995685754	1483.77392608703	1498.40005579437	GTEX
GTEX-ZDTT-0526-SM-5HL4M	483.703604102766	1232.89073737163	412.499447614472	321.131878997119	1347.98465679039	2073.65032879962	GTEX
GTEX-ZDXO-2326-SM-5LU9W	626.389160561414	1289.56294199165	449.886452239863	320.288375053495	1619.58481224844	1297.52841590949	GTEX
GTEX-ZDYS-2226-SM-5S2MI	412.722974299116	1242.39379633885	370.023676814315	310.650316705886	1232.34581699679	2403.40509617634	GTEX
GTEX-ZE7O-1526-SM-5J1NH	533.331816590931	1424.63552283135	417.975281089668	292.552090776051	1359.45587575907	1762.90617677374	GTEX
GTEX-ZE9C-1326-SM-5S2OW	509.207607706532	1155.1482452111	571.729285793035	376.276900279036	1383.06928421843	1763.52631387124	GTEX
GTEX-ZEX8-1226-SM-5S2OK	474.280168470283	1317.89755245888	316.008984173084	354.697782924852	1442.14743184813	1963.11376375872	GTEX
GTEX-ZF28-1426-SM-5S2OG	520.062311328275	1197.26994262531	615.005267319239	308.332487004799	1386.63086450052	1668.86666942452	GTEX
GTEX-ZF29-0826-SM-5S2NP	459.265723402989	1275.66094884546	370.935894579436	354.761906991319	1301.87355441001	2105.45139206035	GTEX
GTEX-ZF2S-1526-SM-5S2OO	589.969123273758	1219.31215796251	315.779376903554	379.395796394319	1374.19439177879	1856.09603674753	GTEX
GTEX-ZF3C-1026-SM-5S2OC	485.477998837902	1211.78883554874	561.852361849657	323.618783376515	1369.87319555241	1838.69658851959	GTEX
GTEX-ZG7Y-1626-SM-5S2NO	488.015248291934	1217.92414632449	670.540395807137	313.15178541948	1369.35746455993	1651.55341742525	GTEX
GTEX-ZGAY-1326-SM-5S2NS	451.361099590412	1223.07762262608	563.798027059836	300.949757778694	1414.78127221956	1877.16887268897	GTEX
GTEX-ZLV1-0926-SM-5S2MR	500.188884463992	1253.18537901525	569.220881354537	271.861940560501	1303.90198361973	1841.39909559619	GTEX
GTEX-ZLWG-0726-SM-5S2NG	513.343598547395	1184.0648459773	340.358767736291	380.849526205592	1443.74827107616	1922.12408677074	GTEX
GTEX-ZP4G-1326-SM-5EGIW	515.707353559001	1218.58772345341	521.472552221118	381.687765655974	1407.60733587599	1687.72063850333	GTEX
GTEX-ZPCL-1026-SM-5GCOX	501.997567921494	1262.01429232824	436.209037599706	340.80979254997	1343.1511950249	1927.05459116015	GTEX
GTEX-ZPIC-0726-SM-57WFM	527.23018613247	1086.16578632326	682.178581841135	259.29940535801	1419.95243261906	1737.58492002382	GTEX
GTEX-ZPU1-1226-SM-5HL71	560.95311878041	1284.23795268893	301.263880895573	369.327129241561	1451.8127207272	1834.08548814163	GTEX
GTEX-ZQG8-1026-SM-51MR9	564.874557896249	1242.07959676831	557.383034366202	281.881398750003	1360.13208378475	1774.66801861385	GTEX
GTEX-ZQUD-0526-SM-57WG4	481.558622896227	1162.8363371962	565.552116893095	353.959096803007	1326.90212776314	1892.31650663016	GTEX
GTEX-ZT9W-1026-SM-57WG5	518.749755200992	1287.70046671799	471.194775114438	384.445662867049	1325.76541197212	1791.62515869856	GTEX
GTEX-ZT9X-0926-SM-5O9C4	542.138288678755	1139.66756653792	504.722062725981	315.528775648278	1467.43999376585	1873.12828221786	GTEX
GTEX-ZTPG-2326-SM-57WFL	425.845553264548	1167.9910235539	390.141621859099	320.710869136021	1464.6077741158	2097.94982372322	GTEX
GTEX-ZTSS-1026-SM-5985N	417.5441944286	1288.25581973575	493.93561757409	295.624298109089	1269.42326977597	2110.91526238816	GTEX
GTEX-ZTX8-0726-SM-59HL9	477.916280886316	1267.44113358237	489.537283006098	292.808793559715	1366.15160933562	1986.22677844927	GTEX
GTEX-ZUA1-2126-SM-57YRB	570.493601078383	1230.41081877171	537.807660586999	310.871453828127	1531.98430720848	1504.52103214288	GTEX
GTEX-ZV6S-1626-SM-5NQ81	481.476879799531	1236.39410297806	574.728000605819	322.67484947622	1362.78768326345	1817.2737823559	GTEX
GTEX-ZV7C-0826-SM-59HK8	337.903190435125	1083.89947187745	639.271908816859	264.888766053691	1283.95569413425	2322.2313950671	GTEX
GTEX-ZVE2-1826-SM-51MRZ	467.329510674005	1232.79827547542	568.509328799564	284.941814708579	1389.56317769921	1843.00017622181	GTEX
GTEX-ZVP2-0226-SM-57WBD	584.438364086917	1213.49543179791	476.966537584932	349.084948123613	1479.53687328256	1663.09696000662	GTEX
GTEX-ZVT2-0226-SM-5GIE3	456.162526192584	1206.58134771324	398.6293275317	321.654520935249	1406.69115672477	2057.74017253257	GTEX
GTEX-ZVZP-1126-SM-5GICU	358.362741766225	1237.8425096289	439.678991155184	270.874711840812	1215.63759884582	2505.22184444923	GTEX
GTEX-ZXES-0926-SM-5E43O	426.427137035267	1240.6722380008	544.948470718731	331.301106069504	1350.39366938024	1954.13139899918	GTEX
GTEX-ZXG5-1626-SM-59HJK	515.84747026734	1348.86723549509	487.794402722145	289.310201052474	1406.85064680481	1703.5891030082	GTEX
GTEX-ZYFC-1826-SM-5GZZA	584.078449498572	1307.42660281437	497.044630647857	378.890566046085	1376.05430894194	1546.73808284368	GTEX
GTEX-ZYFG-1426-SM-5GICS	478.880441446498	1187.08780887491	456.774871824968	369.422076993939	1367.81426630919	1959.39585813447	GTEX
GTEX-ZYT6-2126-SM-5GZZ4	626.797706957834	1245.86751446711	581.403958494437	322.638555318177	1451.77142930115	1405.15389385317	GTEX
GTEX-ZYVF-1026-SM-5E44V	402.26773630016	1280.55118377006	451.93177773638	256.766940775177	1313.19023825979	2219.5863386548	GTEX
GTEX-ZYW4-2226-SM-5GZYG	435.073270023723	1102.50416143153	647.398470556487	238.322200678989	1451.31902771135	1910.809418704	GTEX
GTEX-ZZ64-0626-SM-5GZWR	471.689194336253	1181.08213395439	614.40907143605	331.027474522568	1358.46040360109	1839.36684273036	GTEX
GTEX-ZZPU-0326-SM-5N9BJ	394.926628814537	1095.67797276488	509.69310722305	268.723399871673	1423.88593247715	2206.40760418677	GTEX
GTEX-111CU-0126-SM-5GZWZ	1257.97731415262	796.265563851734	481.79494304139	434.061053817768	1225.98712903317	1227.97295053768	GTEX
GTEX-111YS-0126-SM-5987T	815.431134019461	956.514272150072	640.403970911764	486.327895145429	1220.70199345279	1478.11663144449	GTEX
GTEX-1122O-0326-SM-5H124	1396.16687250766	742.830212361074	481.029653600485	406.746062698793	1149.61076724951	1141.88178983522	GTEX
GTEX-117YX-0126-SM-5EGH5	797.929723957854	887.032726456356	684.408544211942	482.831523784229	1237.3691453965	1519.49468442841	GTEX
GTEX-11DXX-0126-SM-5EGH7	1449.86113187085	766.190477948274	460.486763951434	367.227038326176	1185.15357687583	1026.75813809107	GTEX
GTEX-11DXY-1626-SM-5H12L	853.549771905889	997.775353953134	578.154125522603	446.496016176664	1372.65082741944	1267.40981691295	GTEX
GTEX-11DXZ-0226-SM-5EGGZ	1065.5537877344	852.28826383323	544.408313299684	470.610837113273	1183.09897915804	1422.88224748238	GTEX
GTEX-11EM3-0326-SM-5A5KJ	891.759562809742	913.028950109748	655.204832618393	553.144165899414	1295.55824710184	1230.63416143199	GTEX
GTEX-11EMC-0526-SM-5EGJN	982.16946990974	1077.47758416613	508.31448455081	453.040707030247	1239.96174766378	1258.20528910155	GTEX
GTEX-11EQ9-0126-SM-5986I	863.730470827182	922.894616083267	621.55971219456	479.395282054462	1263.12558593351	1408.44509564089	GTEX
GTEX-11GSP-0326-SM-5A5KW	825.328894461661	937.256689619807	617.284199474804	456.173770570632	1177.0793153228	1612.69233028622	GTEX
GTEX-11I78-1826-SM-5A5M4	1079.69121705873	881.421617032313	483.141251345898	403.8669842757	1243.71444359777	1455.88097822403	GTEX
GTEX-11NSD-0226-SM-5A5LR	803.626855414465	932.848399265202	643.663542512464	489.4193745638	1317.45540946714	1433.57423414393	GTEX
GTEX-11P7K-0126-SM-5986E	792.772053099822	915.381880903023	641.546624982011	494.832054327821	1367.76753438432	1363.72906767559	GTEX
GTEX-11TT1-0126-SM-5LUAA	886.68067631744	910.996129064278	685.210741405143	522.042586464955	1260.22154583392	1250.65206890761	GTEX
GTEX-11XUK-0126-SM-5CVLK	782.465290946474	925.735383609662	663.51565943912	509.880787453192	1232.05745678653	1459.75810123339	GTEX
GTEX-1211K-0126-SM-59HJE	1019.3726259435	834.294219306876	542.768121485614	474.106509611318	1241.28410945655	1470.24343471808	GTEX
GTEX-12BJ1-0526-SM-5FQUD	921.993446320575	898.825694429734	530.910367602474	457.621918576776	1271.17354650236	1533.09340634165	GTEX
GTEX-12WSD-2126-SM-5LZWK	909.74561609888	892.045895896508	521.483535689968	434.431913673102	1249.3597055026	1604.350186629	GTEX
GTEX-12WSG-0726-SM-5EGIG	800.175719670151	968.25121859111	656.389720723407	468.556570892474	1199.97931568404	1529.75005540005	GTEX
GTEX-12WSJ-0126-SM-5GCOM	711.828658513891	947.435918214413	589.903031264207	460.473007227002	1294.504313938	1708.29332222577	GTEX
GTEX-12WSK-0326-SM-5GCOJ	854.802331345437	868.862261513093	624.019341171263	497.224462035137	1164.6086640224	1611.569975578	GTEX
GTEX-12WSL-0326-SM-5CVMK	749.891542737667	920.769790640621	635.200407700303	500.894544116079	1235.08458168953	1653.11531426104	GTEX
GTEX-12WSN-0926-SM-5GCN1	806.40633213056	1069.85144296077	560.779389407755	460.966842669213	1033.61824316533	1723.18403860988	GTEX
GTEX-12ZZZ-0926-SM-5N9EQ	775.052436741152	994.725180955641	578.748509538427	378.789366029497	1287.9107137533	1586.97559713601	GTEX
GTEX-13111-0326-SM-5DUXF	837.721846822638	920.664717229774	622.986794457869	454.000584750646	1242.10370973142	1546.2231996823	GTEX
GTEX-131XF-0126-SM-5DUVF	907.95217936549	904.400833522049	627.786984662318	471.57748392651	1206.95301364258	1419.46607590255	GTEX
GTEX-131XG-1326-SM-5DUX4	817.211199786266	938.245801007164	611.840647440276	523.486406379625	1289.23115312545	1465.41986619377	GTEX
GTEX-131YS-2026-SM-5P9J8	954.784933062293	1023.62594303496	478.839258506558	418.518724371305	1330.65051050864	1325.42068952817	GTEX
GTEX-132AR-1726-SM-5EGHQ	742.119950490305	900.024562181231	705.695458826441	496.117720474542	1204.50142996444	1626.02862089075	GTEX
GTEX-132NY-2226-SM-5J2LZ	844.143913869734	991.682810822559	585.479180043554	456.104934469444	1157.09352412226	1587.86787639571	GTEX
GTEX-132QS-0126-SM-5IFH9	709.577734726732	970.571543015668	643.680991179459	473.051824623181	1255.0191515951	1638.87171108439	GTEX
GTEX-1339X-0826-SM-5J2O6	859.794512467471	848.504892757197	620.921961829238	451.770500231592	1277.18267421342	1526.22296017302	GTEX
GTEX-1399R-0326-SM-5KM1X	884.328792657101	883.268067184354	570.197702249253	494.605768506837	1270.89081453156	1428.52283922537	GTEX
GTEX-1399S-0426-SM-5IFG5	713.729785921807	945.147731661673	642.541733557341	476.385369336004	1283.39610557563	1629.94040351724	GTEX
GTEX-1399U-0226-SM-5P9J2	1128.30891471675	876.773899342549	491.076785185325	492.040465898508	1222.10826489156	1313.57638136565	GTEX
GTEX-139YR-0126-SM-5IJEY	776.958972684268	908.6555534934	587.044802123348	505.776190627865	1326.97472968103	1563.98829578142	GTEX
GTEX-13CF3-0126-SM-5IFFM	1148.42058077607	861.782989457281	529.327298537122	452.425937987145	1219.08837927914	1275.72305105427	GTEX
GTEX-13D11-0426-SM-5LZYA	1249.64297144261	847.952852379521	436.564621617347	404.334836607048	1205.42000056431	1273.23808275759	GTEX
GTEX-13FH7-0226-SM-5IFGG	723.829693611085	923.175695892872	747.046830507796	513.50071226329	1283.50031948474	1417.41377191398	GTEX
GTEX-13FTW-0126-SM-5IJED	771.292629645456	914.22515495821	672.596561021608	506.19655028232	1330.49281125019	1419.51442943848	GTEX
GTEX-13N11-0826-SM-5IJFP	848.593085746788	862.419764909186	576.317453799151	464.701905896938	1269.40094222099	1637.89585492021	GTEX
GTEX-13O21-0126-SM-5IJE8	724.936667272225	895.329643254317	676.170394992244	479.574045681723	1282.29724515593	1602.99129729721	GTEX
GTEX-13O3O-1626-SM-5KM1O	924.891642912141	922.657199732889	565.162836946491	420.012029896155	1270.41080211596	1368.65831863967	GTEX
GTEX-13O61-0126-SM-5KM4P	901.824320732882	905.605253112859	606.756586885979	499.921604502206	1229.69642532896	1396.25062866276	GTEX
GTEX-13OVI-1226-SM-5J2ME	846.968848098499	910.358328779711	602.567477351361	483.183989810191	1313.48126202769	1426.80247906178	GTEX
GTEX-13OW6-1726-SM-5IJGI	924.450057105556	937.063510047631	602.182483601804	526.251476229878	1280.65858370043	1219.78275730682	GTEX
GTEX-13OW7-2726-SM-5L3HN	948.717161258948	988.957406142606	575.494427365981	488.049740823393	1079.69131924907	1489.04606396781	GTEX
GTEX-13PL7-1026-SM-5MR5C	820.783418586592	987.654885078484	492.873324260056	465.390232015795	1160.7853088408	1760.28889389108	GTEX
GTEX-13PVR-0226-SM-5RQJI	827.688745184123	880.995483958082	638.095564011344	487.025851676174	1250.17807214328	1463.10992498352	GTEX
GTEX-13QBU-0526-SM-5IJFE	837.926372696269	905.733036871726	625.034466341034	462.775126379289	1217.01508181293	1532.07612244466	GTEX
GTEX-13W3W-1326-SM-5LU4T	887.424217129574	902.114501916556	679.313983235079	514.809883020433	1216.18698944129	1343.57421977216	GTEX
GTEX-145LT-0126-SM-5S2QJ	816.319358269567	914.464019415349	587.995776235989	473.840589479908	1143.38163327631	1678.54184675927	GTEX
GTEX-145MN-0226-SM-5QGPY	725.238974624864	956.366154811124	558.999738487725	500.681209684933	1218.80695920819	1813.44965206731	GTEX
GTEX-146FR-1526-SM-5SIB8	1164.72280768563	874.336169190717	471.350019623887	424.542357301335	1333.3553041751	1135.41030108988	GTEX
GTEX-147F4-2526-SM-5NQBB	886.794786162553	920.922306298801	583.6746011808	463.488580539564	1151.39459132897	1570.30745651615	GTEX
GTEX-14BMU-0126-SM-5S2Q9	832.135688846904	895.093834478071	640.834153814601	481.967617775328	1312.66075368691	1382.89818325993	GTEX
GTEX-14C38-1726-SM-5RQJC	691.351362024633	1071.22698194338	615.468450393051	406.651708436745	1214.24741436126	1685.33837200646	GTEX
GTEX-14E1K-0626-SM-5S2PG	973.484354087426	924.742488860844	533.815686579953	477.645254799844	1296.47865900228	1355.0421611674	GTEX
GTEX-14H4A-0226-SM-5SI6Q	908.608620056509	864.761860036125	570.157096946337	494.035757329541	1291.07030107187	1494.33000571889	GTEX
GTEX-NFK9-1726-SM-3TW8P	808.474258695	994.360843226461	600.823363124949	483.35999200654	1340.33116405267	1354.18695592704	GTEX
GTEX-O5YT-1326-SM-3MJGR	772.86941066906	996.041115133491	644.989012859132	545.369263147419	1364.50686108712	1265.54576646877	GTEX
GTEX-O5YV-1126-SM-3LK73	958.126598534339	987.697224823055	521.602992065066	396.638006836483	1264.53726488331	1438.26050347175	GTEX
GTEX-OHPK-1326-SM-3MJGN	1292.02291936336	773.638333495466	494.396835935212	444.826397363924	1231.52997229249	1146.66060449341	GTEX
GTEX-OHPL-1326-SM-3MJGG	998.990414950345	870.093060516162	544.494651677671	491.766820065065	1328.66965627134	1335.17157072531	GTEX
GTEX-OIZH-1326-SM-3NB1H	800.321847509836	887.449983271367	594.99198389832	516.904035073351	1195.45291004227	1666.11472404003	GTEX
GTEX-OOBK-3125-SM-3LK5R	1468.18669257155	712.080660460802	472.453456098172	393.19768308723	1067.32816646966	1188.86743978729	GTEX
GTEX-OXRK-0126-SM-3NB1E	819.347370453249	907.259947258132	701.133641113847	513.542487368067	1252.80797232653	1338.8800978925	GTEX
GTEX-P4QS-1326-SM-3NMCD	800.967060579573	890.377960988539	643.135870297133	513.926670318421	1244.09245216143	1580.75736190437	GTEX
GTEX-P4QT-1326-SM-3NMD3	699.494852280944	906.380731242275	569.504422250335	496.200967194123	1240.81333868377	1841.32275025624	GTEX
GTEX-PLZ5-0326-SM-3P614	843.113630716718	906.789432383277	656.769693468074	531.527515406631	1129.85672349349	1575.24087530557	GTEX
GTEX-PLZ6-0226-SM-3P61I	1214.9833457364	824.566934209814	517.606469141151	444.429122741348	1132.89447934394	1371.08235512644	GTEX
GTEX-PW2O-0226-SM-48TC7	1000.65480595801	910.877287367336	562.961377795987	453.860137054726	1282.68240955972	1250.84035323887	GTEX
GTEX-PWCY-0226-SM-48TD8	838.781143159297	952.595127880203	629.711188889498	495.00601091902	1285.80354117499	1352.75314557085	GTEX
GTEX-PWOO-0326-SM-48TDB	687.509582760353	972.901764004915	733.393509543494	452.366942387943	1243.72897167572	1572.02244602508	GTEX
GTEX-PX3G-1326-SM-48U18	1354.90954011376	724.894189299543	411.20171184972	427.345955279733	1097.31514705455	1417.15909235903	GTEX
GTEX-Q2AH-0126-SM-48U2B	768.686512512929	976.836496869635	584.872605717755	483.507442559338	1223.42881710997	1634.75951224717	GTEX
GTEX-Q2AI-0226-SM-48U1D	839.396804767606	877.488890208716	650.142825964321	512.006464184846	1227.52013137325	1456.28590326453	GTEX
GTEX-Q734-0126-SM-48U1E	811.75955141879	921.926902664389	593.637134325371	457.367480215285	1251.10150462842	1552.73286464674	GTEX
GTEX-QCQG-0126-SM-48U27	803.878815746313	898.491085576292	626.121606078095	498.507190229552	1246.71005244007	1499.60316960186	GTEX
GTEX-QDVJ-1126-SM-48U1U	805.486727651252	889.393288479695	584.537111304132	436.584816187165	1238.43158048041	1759.87607396246	GTEX
GTEX-QDVN-0426-SM-48TZ6	755.301495702604	852.737746582442	610.916356155564	479.00116586991	1293.07798425928	1627.99732774446	GTEX
GTEX-QEG5-1826-SM-4R1JP	786.337276922283	1024.95173999611	668.595674808358	463.673818016383	1286.25372413421	1287.62394291788	GTEX
GTEX-QLQ7-0126-SM-4R1JW	911.014481058679	886.757971649744	540.464458950854	474.25013278585	1242.89997681232	1582.5249587491	GTEX
GTEX-QLQW-0226-SM-447BJ	786.68058384886	896.55024074922	647.318762241001	507.252731234473	1255.55285335779	1532.21620391734	GTEX
GTEX-QMRM-0126-SM-4R1K9	932.262102029976	893.75775064741	523.072159898158	460.037240817185	1307.46518896086	1466.06458508429	GTEX
GTEX-R53T-0226-SM-48FEH	1334.59525550422	791.473386213446	517.177320269152	424.95637910682	1209.82322354879	1012.97972203313	GTEX
GTEX-R55G-0126-SM-48FDS	1098.51613658773	897.786754337078	512.521449269124	456.626825744886	1293.19817886693	1184.14097254556	GTEX
GTEX-REY6-1726-SM-48FDL	864.836212256782	1077.35654846763	514.338595507119	463.181458933096	1242.89021410193	1459.89907918859	GTEX
GTEX-RM2N-0126-SM-48FDD	806.854046959051	965.963619975098	662.035458136561	470.552181317998	1235.01069426994	1393.25872174196	GTEX
GTEX-RUSQ-0226-SM-47JWT	789.956149858782	980.980198790273	726.173773816217	533.969662583689	1118.98508021023	1450.11874404988	GTEX
GTEX-S32W-0126-SM-4AD61	1094.38022765732	813.805607685317	568.85972911502	461.288128291159	1173.00820718152	1425.93497562406	GTEX
GTEX-S33H-1326-SM-4AD6A	798.653685568065	1003.46610274468	648.988155675618	450.063470122107	1275.03946250074	1415.44669785287	GTEX
GTEX-S341-0126-SM-4AD64	1010.01808393703	917.320514509951	543.060425280022	470.562591274014	1335.82364254576	1247.06447402987	GTEX
GTEX-S3XE-0126-SM-4AD4R	814.970513772566	981.997945505085	654.897202149948	493.751226711942	1334.64787930808	1308.29687651485	GTEX
GTEX-S4Q7-0226-SM-4AD5O	708.962515777029	969.024052978747	671.942870299932	456.363874084702	1301.64924393667	1568.42180340663	GTEX
GTEX-S4Z8-0126-SM-4GICC	783.859807413906	905.81003288281	611.972935519938	499.710467465317	1322.45534309887	1461.70227727945	GTEX
GTEX-SUCS-0526-SM-4DM56	770.509248770506	1007.34508864938	602.474504786733	452.617102265655	1132.67991926533	1651.60675223373	GTEX
GTEX-T6MO-0126-SM-4DM6X	827.09748734569	940.230148829358	609.131141827886	446.660460633482	1307.35153477711	1409.90031694627	GTEX
GTEX-TKQ2-0226-SM-4DM6V	878.129198914886	961.349228501695	609.143165011257	538.570155969705	1170.51092511291	1418.92491156354	GTEX
GTEX-TMMY-0126-SM-4DXTP	812.799534882648	1028.78486342263	665.379296901147	512.997056450313	1262.12987951888	1286.64194732797	GTEX
GTEX-U3ZM-0226-SM-4DXTA	1317.20574457807	794.612719468499	548.493139730316	431.022469907266	1170.16460335934	1066.45429133076	GTEX
GTEX-U3ZN-0826-SM-4DXSZ	1256.75824012165	812.315835422932	560.004297028984	475.015224659465	1207.78191617527	1017.54857631564	GTEX
GTEX-U4B1-0126-SM-4DXSN	844.863650151943	873.361862638884	655.786629369847	504.533946941229	1266.87158622007	1479.77360510353	GTEX
GTEX-UJMC-0226-SM-4IHLH	834.768553967373	896.308793928821	572.647809477143	468.911831110204	1319.3106682104	1500.7824342586	GTEX
GTEX-V1D1-0226-SM-4JBHG	767.577354432568	981.6056375897	576.53597851736	484.664530714559	1173.59415582408	1687.18334448753	GTEX
GTEX-V955-0126-SM-4JBH5	973.600617443072	863.233864742038	619.962349444193	510.772316211683	1242.71881336096	1275.86376161306	GTEX
GTEX-VJYA-0526-SM-4KL1R	1006.5030688282	858.94873713279	494.296686766187	461.471022319643	1270.61574598027	1483.54105219836	GTEX
GTEX-VUSG-1526-SM-4KKZH	806.096301826999	1027.13886804842	606.243285780904	479.157777807555	1228.89049005434	1471.79935638918	GTEX
GTEX-W5WG-1126-SM-4LMK4	852.951909991817	911.421342909536	642.235833887334	486.005317511324	1255.79075316166	1370.0285995011	GTEX
GTEX-WFG8-0126-SM-4LVMH	762.484031493412	886.48689285124	602.146628649305	475.03247199729	1268.72855127403	1638.62054219412	GTEX
GTEX-WHPG-1526-SM-4M1ZK	889.249252926445	918.948399094731	531.798814498243	525.443658684923	1306.57940627376	1466.85377327979	GTEX
GTEX-WQUQ-0126-SM-4OOSS	779.361503821232	922.420243030289	651.770329971769	478.534624843945	1189.00124629425	1622.86092596756	GTEX
GTEX-X4EO-1726-SM-4QARN	1064.95088599437	982.646215954632	480.003099800692	400.340860210454	1131.18182571128	1546.02433068913	GTEX
GTEX-X4LF-0126-SM-4QAS7	1077.83911875242	848.512278722605	513.404319870481	444.211910876606	1319.02781659963	1294.28772833748	GTEX
GTEX-XMK1-0226-SM-4B65D	870.380306070371	943.881038937134	589.485905118524	479.013413112086	1219.21502650845	1496.19920636036	GTEX
GTEX-XQ3S-1726-SM-4BOOD	925.979723968759	833.703888208843	610.437367188071	474.986917772362	1177.8071864543	1411.3018548471	GTEX
GTEX-XUJ4-0126-SM-4BOP7	741.047480441685	936.941342168543	591.549859005729	451.649921315387	1197.16234885717	1723.65317695592	GTEX
GTEX-XUZC-0226-SM-4BOO7	750.828927471073	943.246947700786	596.625637854244	482.625541663474	1273.18098411941	1598.57310465059	GTEX
GTEX-XV7Q-0226-SM-4BRVL	856.534741070743	816.382053751899	806.849320193094	473.930379771369	1218.68210687925	1333.96016576042	GTEX
GTEX-XYKS-0926-SM-4BRVG	826.302666683337	889.552796704116	650.754400359455	554.129196074848	1242.26251131804	1386.93177429379	GTEX
GTEX-Y114-0526-SM-4TT8V	782.970972368202	932.90759679883	645.020101597044	528.073268771102	1357.94720870732	1318.46781876876	GTEX
GTEX-Y3IK-0226-SM-51MRJ	1020.36417055958	868.362058951699	556.458448825089	479.133741490658	1165.61978753224	1515.14242347559	GTEX
GTEX-Y5LM-0126-SM-4VBRL	1246.0344379829	832.17468321989	474.796619111434	464.079457859033	1246.52191134784	1164.16036242481	GTEX
GTEX-Y5V5-1326-SM-4V6G9	874.647296801261	1031.17387072653	587.36095178628	538.822966186416	1096.08125667079	1498.6039973098	GTEX
GTEX-Y5V6-1926-SM-5IFIL	1150.6197414257	852.97355890142	609.10636420824	361.63566943125	1177.05543532965	1271.54217677129	GTEX
GTEX-Y9LG-0126-SM-5Q59W	1206.55274470041	769.935162221566	507.699816855295	453.568983872122	1216.08113472168	1323.25684505542	GTEX
GTEX-YB5E-0226-SM-5IFHI	1050.7904045851	871.492695957107	495.455787873798	454.776954919743	1292.68974837466	1385.58253727336	GTEX
GTEX-YF7O-0126-SM-5IFIR	1296.98663257449	792.735021936671	437.579806620121	415.500664463829	1161.48512026486	1326.73307644228	GTEX
GTEX-YFCO-0126-SM-4W1YT	740.955949340366	995.971437790076	598.191550473001	467.558825224836	1253.33126150004	1617.74248226334	GTEX
GTEX-ZA64-0226-SM-5HL9C	1202.35366894076	842.478283464664	507.852152247596	465.690663112967	1138.0789215899	1340.37576240902	GTEX
GTEX-ZLFU-0826-SM-4WWBP	689.246909625392	918.482283173343	678.441820119408	488.600341257399	1204.24480752597	1768.25397076044	GTEX
GTEX-ZLV1-0226-SM-4WWC1	970.146551166264	855.143095209728	595.639964782206	469.052175660247	1219.13178539905	1442.00218027568	GTEX
GTEX-ZLWG-0126-SM-4WWC5	903.583822477123	849.540780299126	574.278525260949	465.382337374263	1276.58437774065	1572.12783598159	GTEX
GTEX-ZP4G-0126-SM-4YCE3	873.744147206878	977.982369482065	614.005046208359	494.295489545178	1265.23790511803	1374.72347697702	GTEX
GTEX-ZT9W-0126-SM-4YCFD	721.842284307491	1004.74556648719	595.608638001684	431.059626913972	1277.31310994205	1636.63059562965	GTEX
GTEX-ZT9X-0126-SM-4YCFC	796.355013492093	874.157568004782	628.161875225789	527.425180159847	1268.14969847595	1537.28651685717	GTEX
GTEX-ZTSS-0326-SM-5987M	835.261528603798	915.787608653779	657.733822106136	515.560686810922	1197.67623399227	1474.67830067757	GTEX
GTEX-ZUA1-1926-SM-5E45E	963.503257840726	1125.93745870682	559.294777422611	408.798366768448	1316.41465867128	1061.75642643536	GTEX
GTEX-ZVP2-0126-SM-5NQ7D	727.406498255297	963.849304294551	555.037920668302	502.453963319141	1255.99378130417	1711.28721495733	GTEX
GTEX-ZVT2-0826-SM-5GIEO	779.158609964941	912.441312953865	682.758804765837	485.394999093082	1265.33244413729	1459.22507738452	GTEX
GTEX-ZY6K-0126-SM-5SIAM	1264.09689864569	788.617448228519	465.666063896073	479.335132980051	1208.27356825732	1242.4427010426	GTEX
GTEX-ZYFG-0926-SM-5BC5U	834.117662040596	873.905305015754	638.735840991237	516.637372217587	1298.0527644355	1460.81835420065	GTEX
GTEX-ZYWO-0126-SM-5GZWQ	760.069978513039	896.208155318647	676.458769991268	520.238817818792	1188.8713078032	1619.83965982493	GTEX
GTEX-ZZPU-1226-SM-5N9CK	792.197795705017	954.785713919978	578.605866202246	518.065466725829	1286.0567906455	1526.37456584009	GTEX
GTEX-111YS-0526-SM-5GZXJ	699.021811299604	914.205670255786	559.838568031738	380.474735543871	1626.94392679437	1347.86133772749	GTEX
GTEX-1122O-1126-SM-5NQ8X	710.511545938762	916.343823054179	415.458756632439	354.849598273792	1531.74848814982	1648.76588394485	GTEX
GTEX-1128S-0326-SM-5GZZF	658.594685330884	915.95407535607	499.902099571555	358.179329219005	1640.22120335033	1514.64918978538	GTEX
GTEX-117XS-0426-SM-5GZZN	859.651670107771	622.531122695928	615.161118372408	365.344426189318	1592.79121681307	1285.37881848633	GTEX
GTEX-117YW-0226-SM-5N9CM	785.376519694882	936.563865835392	386.859144092072	321.52065191164	1597.63410938554	1468.70885888512	GTEX
GTEX-11DXX-0426-SM-5EQ5F	621.770395429945	989.145958063374	550.485660975359	366.855504062143	1510.77149398332	1625.00742205911	GTEX
GTEX-11DXZ-0426-SM-5987Y	700.496240334262	986.857495674997	443.463399095474	354.717578487431	1605.98821387079	1503.13158332697	GTEX
GTEX-11DYG-1226-SM-5N9DC	662.39030056442	897.293678479101	597.118655196205	308.722456246621	1658.73685505156	1364.75566594525	GTEX
GTEX-11EM3-0226-SM-5985Y	725.289391231808	894.705909453614	492.271985865768	374.570127659835	1590.30687005559	1460.34084489389	GTEX
GTEX-11EMC-0926-SM-59863	575.50915577775	1030.10675206046	405.976725130048	335.257651144024	1624.47517743631	1727.53245567262	GTEX
GTEX-11GS4-0326-SM-5N9F7	626.865677673738	751.693211631704	596.391056349109	280.80322239483	1546.76473824965	1805.64128292851	GTEX
GTEX-11GSP-1126-SM-5A5LM	679.142946495976	912.797702473735	519.297985852756	330.747473792177	1603.94650156068	1477.10077440863	GTEX
GTEX-11I78-0726-SM-5A5M1	500.612218026655	1083.25634602724	507.845810281264	319.064258142032	1626.28129195796	1709.16848808754	GTEX
GTEX-11LCK-0726-SM-5PNYC	635.547317310511	940.790926725718	487.579334131059	416.926718547594	1598.71015950742	1590.79489805429	GTEX
GTEX-11NUK-0726-SM-5A5ME	695.569185596219	969.653379057328	473.667019860265	387.149952900615	1642.34340830992	1444.45660739099	GTEX
GTEX-11ONC-0926-SM-5BC5E	620.404699996711	866.991137333168	417.197903514956	368.560521074759	1555.9904811932	1885.64437764921	GTEX
GTEX-11P81-0326-SM-5HL6B	718.875690756782	962.555475518979	427.558919626525	366.416924315236	1615.27788339119	1427.78037084202	GTEX
GTEX-11P82-0126-SM-5HL72	810.318834894418	943.225719703806	436.903876699224	379.245086094753	1601.68313307078	1284.20184591931	GTEX
GTEX-11TT1-1226-SM-5Q5AV	690.383826046177	1020.63770667577	526.58850651526	413.511882385119	1586.61616889598	1371.69400615978	GTEX
GTEX-11UD2-0826-SM-5EQKS	776.386166709931	890.241367236924	510.360463159805	385.174509077661	1657.8785907585	1227.59086741044	GTEX
GTEX-11ZTS-0826-SM-5EQ49	763.301123230085	974.220711340928	447.217546291668	404.847194231801	1669.38074321488	1248.16819838295	GTEX
GTEX-11ZVC-0326-SM-5CVLC	782.847482638857	852.433834906939	439.89523640241	393.601301684456	1659.94896321243	1330.80329506826	GTEX
GTEX-1211K-0326-SM-5FQT1	679.758831466883	948.712573934841	535.42486548461	355.28420404624	1650.56066108507	1416.80332075539	GTEX
GTEX-1212Z-0826-SM-5EQ51	772.047278580529	838.863771968913	461.488579952109	349.868831338813	1607.2530844258	1505.1911497689	GTEX
GTEX-12696-0426-SM-5EGL5	704.847521806659	939.999991800732	411.320682511545	362.029184933094	1608.15661420296	1582.48823533584	GTEX
GTEX-12C56-0226-SM-5N9FB	718.388443436315	1074.37426590419	407.238646627794	374.560255201849	1564.01145185116	1461.26226248372	GTEX
GTEX-12KS4-0626-SM-5PNY4	786.488021727385	908.577729544044	416.101684308169	377.684207256096	1648.08201191356	1325.98313075439	GTEX
GTEX-12WSD-1326-SM-5GCNU	933.881153325375	868.875237217802	368.031360647463	366.94394208069	1661.8283680693	1243.97716621711	GTEX
GTEX-12WSK-0426-SM-5GCNS	783.037471769497	871.337029263798	510.36671308611	379.829198524629	1553.4490916528	1396.0464023572	GTEX
GTEX-12WSN-0326-SM-5GCP6	739.625075599268	1006.77710617814	439.843406507581	395.783904951902	1580.87001307966	1349.10111954453	GTEX
GTEX-12ZZX-1026-SM-5LZUW	872.377867445163	856.478570944087	557.436532833746	373.774021658081	1650.71904011387	1011.35386549491	GTEX
GTEX-12ZZY-1326-SM-5GCNW	791.62345554048	967.035689607932	444.705045608549	343.880898620456	1639.78430081717	1257.47320161216	GTEX
GTEX-13111-0526-SM-5LZVF	588.608383917923	1061.61704194688	355.981284880331	323.614820426677	1572.3738084327	1864.95500179503	GTEX
GTEX-13113-0526-SM-5GCN2	667.559278256195	848.022132372824	458.153089332678	392.691271866713	1617.79815900185	1625.94118020906	GTEX
GTEX-1313W-1026-SM-5EQ5I	635.315014932768	829.916099706352	457.74119781042	369.671947750735	1604.05253535461	1787.21299142452	GTEX
GTEX-131XF-0626-SM-5GIDS	717.715735602329	856.457454431026	503.893002366308	359.759217355168	1555.93155743821	1569.59283728172	GTEX
GTEX-131XW-2226-SM-5PNY1	722.923568840312	1009.47478860576	391.636315747815	314.484972770532	1611.20238828312	1530.40022001839	GTEX
GTEX-131YS-1126-SM-5N9FQ	815.946038360134	882.692191316263	443.613917481781	369.024868625169	1617.99004027755	1327.00025527279	GTEX
GTEX-132AR-2126-SM-5K7XG	631.413979134065	933.027117506872	555.474637855183	392.595144360917	1549.84027734533	1550.65448993164	GTEX
GTEX-1339X-0526-SM-5KLYW	694.718843879801	876.414665263441	477.652642741923	397.418328346786	1550.88418566669	1590.06875709235	GTEX
GTEX-133LE-0226-SM-5PNY3	774.990399069012	992.635545385094	391.937794992122	379.059202675183	1614.90085087047	1416.72203166117	GTEX
GTEX-1399R-0626-SM-5K7UZ	726.799088004682	954.68838751042	400.721329152726	373.437233605744	1629.05130786844	1492.61246438629	GTEX
GTEX-1399T-0526-SM-5J1NC	724.362179722715	923.979056473498	434.311038410624	390.301186007767	1634.66002612993	1406.81586132223	GTEX
GTEX-1399U-0426-SM-5K7UU	802.11482482386	945.614902138758	369.103478496244	389.838523274323	1595.94811044677	1533.71599023424	GTEX
GTEX-139D8-1226-SM-5L3ED	837.810408758929	845.687907915782	494.117986443616	404.037266095581	1616.50427751863	1206.97720065403	GTEX
GTEX-139TS-0226-SM-5K7W5	693.886441920527	938.511936199038	450.597313553217	267.962431183903	1601.79990803162	1632.50316012272	GTEX
GTEX-139TU-1126-SM-5J1NY	528.55027916767	1000.57123928982	430.189157317492	353.964310800791	1539.03520407085	1909.34600573238	GTEX
GTEX-139UW-0426-SM-5K7V4	712.57679930987	994.935220089933	423.196719375415	325.707086218387	1578.68079296381	1549.65390062887	GTEX
GTEX-139YR-0626-SM-5IJBT	664.669088419294	959.880466800647	438.654454870583	363.466967248347	1591.58814669138	1647.20310738008	GTEX
GTEX-13CF3-0526-SM-5IJBV	545.388299376618	945.669939873169	473.869308522419	338.890180831805	1578.10568367699	1894.02996894829	GTEX
GTEX-13D11-1426-SM-5K7Y9	654.590658984856	875.999064400212	428.786759424188	369.087492855873	1584.00370554512	1761.79956259262	GTEX
GTEX-13FH7-0326-SM-5J1MR	547.175668794071	1011.0011413369	532.829884049265	321.293687893004	1607.19570984776	1655.45384180248	GTEX
GTEX-13FHO-1626-SM-5IJGB	793.518741893115	864.378483346348	530.525045803897	349.776846472892	1651.66478267575	1249.61194183463	GTEX
GTEX-13FLV-1426-SM-5J1N4	726.876153424867	968.432837413074	405.429847842428	391.961111620835	1625.15113495311	1413.27055204224	GTEX
GTEX-13FTX-0226-SM-5K7TX	664.070226412235	865.02512596105	462.51286365421	405.598302896315	1545.05544138444	1762.65335172871	GTEX
GTEX-13FTZ-0126-SM-5K7V3	765.688886897253	965.428791584191	387.925979457531	353.756115907698	1626.45829156868	1437.14004523799	GTEX
GTEX-13N2G-0526-SM-5MR5L	675.025491352817	742.746474556196	439.52800938793	362.655133946295	1600.12466307384	1822.55423790982	GTEX
GTEX-13NYB-0426-SM-5IJDD	867.967421163429	895.674447278303	439.481833508054	439.741724392807	1647.46737901347	1072.06946407503	GTEX
GTEX-13NZ9-1226-SM-5MR3J	616.835860189919	1101.19509976309	388.615547572198	284.261813589416	1608.37916798033	1656.76930105825	GTEX
GTEX-13O1R-1026-SM-5KM2L	663.852821356111	936.793809637295	429.615619606256	394.025352729626	1610.36608175541	1654.65321430472	GTEX
GTEX-13O21-0426-SM-5K7VR	631.512539829578	978.098779099178	370.474903560164	335.855246767428	1575.93118875357	1796.57798826162	GTEX
GTEX-13O3O-1126-SM-5KM4Q	715.784523267475	894.776672948122	540.940910845047	329.057696587418	1599.42469656307	1478.9186566436	GTEX
GTEX-13O3P-1126-SM-5L3FG	665.220737024519	895.300958426769	435.330484318149	352.069503583913	1570.43738784345	1710.87770902367	GTEX
GTEX-13O61-0326-SM-5KM2O	713.771001512619	952.187821263318	416.89712178739	384.272331567018	1578.39809984323	1571.47252834956	GTEX
GTEX-13OVG-0826-SM-5L3D8	726.861524469278	1001.3878080418	390.793866254667	359.017303734645	1615.27774583149	1474.29065137766	GTEX
GTEX-13OW5-0826-SM-5J1NE	678.779345590481	962.291116478045	451.424506458479	341.187620264541	1586.48302750975	1596.1806158448	GTEX
GTEX-13OW6-1526-SM-5L3HX	788.331246155813	876.546558195149	473.886269953179	373.49176907346	1560.71527963091	1485.57413091495	GTEX
GTEX-13OW8-1826-SM-5L3H1	840.454737656058	916.13449200761	425.897080529289	400.098734430988	1629.2028183491	1238.14211203049	GTEX
GTEX-13PVQ-1426-SM-5J1O4	659.998819304762	909.534216028682	425.604252961113	381.661873280477	1661.8960923015	1596.3073436628	GTEX
GTEX-13PVR-0826-SM-5S2PV	701.704117189115	934.800008690624	456.322476487472	357.180113143272	1532.42945958416	1626.61626862622	GTEX
GTEX-13QBU-0326-SM-5LU3F	691.368056508217	899.503458197754	495.920419674041	392.869104275802	1612.24608154126	1462.55344191598	GTEX
GTEX-13RTK-0126-SM-5RQHQ	512.079951555605	950.395247412546	421.137523236319	349.776748661156	1508.4004695833	2091.86711680436	GTEX
GTEX-13U4I-1026-SM-5LU3G	624.715891640009	986.995469395143	479.467281337826	354.810281017535	1591.67077726821	1636.79021653269	GTEX
GTEX-13VXT-0826-SM-5SIAP	484.182300077816	1028.91055403416	439.720725949614	291.737107355992	1528.02191287218	2062.83627329824	GTEX
GTEX-13W46-1826-SM-5K7VA	760.766781554108	903.916150808423	399.251214723812	319.584866447427	1638.63211395553	1458.45992660428	GTEX
GTEX-13X6I-0926-SM-5LUAB	537.060159761894	905.518393519685	471.844500962192	331.949577259635	1572.22153300506	1940.41562227135	GTEX
GTEX-13X6K-1926-SM-5LU4O	720.594536446228	899.850635457163	517.596033298761	395.215356013186	1611.68049458148	1322.83543903991	GTEX
GTEX-13YAN-1526-SM-5LU3E	650.498739435611	938.591247441546	482.545918642269	347.899964140538	1592.33279873557	1589.499957777	GTEX
GTEX-144GN-0326-SM-5O9AD	549.312494087881	941.050486626699	509.669298640203	352.593600268265	1623.38960220701	1746.18604837527	GTEX
GTEX-145MH-1026-SM-5Q5CI	730.947096235662	1024.66039237391	456.349305607234	294.932987535655	1579.61342021089	1477.30205838051	GTEX
GTEX-145MO-1226-SM-5QGPC	757.799645115582	927.50080817443	418.402442552362	319.353253118289	1609.95747666276	1470.95437948934	GTEX
GTEX-146FH-1326-SM-5NQBI	575.963085454458	931.735390469865	582.518948091468	349.901826605604	1616.14514021426	1536.2113668022	GTEX
GTEX-146FQ-0826-SM-5LUAJ	771.463603149014	895.162831716054	397.390759937708	395.628618639637	1638.65718315445	1392.90038492911	GTEX
GTEX-146FR-1026-SM-5NQ9T	547.182480704218	921.466496111852	439.518930132636	386.116394224942	1570.97863285873	1898.62398726279	GTEX
GTEX-147F4-1026-SM-5Q5F9	750.606644407687	908.787450245538	459.311438262935	388.575471999954	1671.97323967364	1297.88912037029	GTEX
GTEX-1497J-1026-SM-5NQAV	700.782362960585	919.590981690919	456.312176837758	385.52278032	1615.86000306118	1471.23145473537	GTEX
GTEX-14A5I-1326-SM-5SIAQ	648.015230390024	937.033428784028	506.771810266575	320.656496823575	1632.06835105186	1525.51535517446	GTEX
GTEX-14AS3-0526-SM-5QGQQ	689.418490598057	974.036488755507	425.036726836094	404.962546374827	1597.02561930506	1499.00615359559	GTEX
GTEX-14ASI-1126-SM-5QGPN	724.061829890196	853.104075748928	411.761089512435	364.519766258118	1619.62283432496	1600.74995117477	GTEX
GTEX-14BIM-2626-SM-5S2OF	758.583227909298	897.368004354118	410.970220677935	331.968827394204	1580.16950011547	1535.3111224749	GTEX
GTEX-14DAQ-1326-SM-5RQIM	773.25499843835	867.977763834066	437.399560034595	368.204318212072	1626.64752166951	1390.95643797123	GTEX
GTEX-14ICL-0326-SM-5S2OS	747.988699264519	974.687009596721	459.621669467003	405.925824811039	1537.68146836991	1384.42438519131	GTEX
GTEX-N7MT-1426-SM-3LK5M	624.65609082158	1013.66241109901	469.353542311701	339.212479500983	1581.86156556351	1583.15217241215	GTEX
GTEX-NFK9-1326-SM-3LK5I	692.3183871478	1008.86731021387	424.504041733019	298.444192480777	1552.18731750101	1627.39815979844	GTEX
GTEX-NPJ8-0526-SM-3MJHN	656.956097057556	951.300335754143	495.761858918068	363.461284783788	1560.5189908132	1622.92771483124	GTEX
GTEX-O5YT-0426-SM-3MJHD	702.018729495445	958.122578755976	473.512247165306	409.075468243872	1622.81784396263	1433.42030618719	GTEX
GTEX-O5YV-0626-SM-3LK64	695.926266855063	945.560763573759	449.58113495006	378.86813293148	1609.53863454428	1509.63432401197	GTEX
GTEX-O5YW-0426-SM-3MJHJ	662.92352068972	1013.09922908635	407.925085281185	383.084608253131	1626.41131528622	1574.98449772329	GTEX
GTEX-OHPK-0426-SM-3MJH3	658.766506959725	930.156232891432	444.850805621317	380.598569127328	1620.50133775144	1624.66874881231	GTEX
GTEX-OHPL-0426-SM-3TW8X	675.74723392237	1015.198196416	465.899406701312	348.253048624978	1574.02830254828	1572.61467158405	GTEX
GTEX-OHPM-0426-SM-3TW8V	761.933738137548	950.250778112166	435.185114359981	388.452929052846	1610.20949229782	1384.41079540026	GTEX
GTEX-OIZG-0426-SM-3LK5W	782.088509032009	947.03272397134	451.318899158895	374.808868082131	1658.96401682794	1285.31448141772	GTEX
GTEX-OIZI-1126-SM-3NB1F	694.924542502657	995.674317078034	481.47797337058	377.343466210225	1585.61926437312	1424.05703849271	GTEX
GTEX-OOBJ-0426-SM-3NB1S	658.465656707767	932.994948634188	389.023704730266	421.93346139863	1568.41140858641	1710.86272776731	GTEX
GTEX-OOBK-0425-SM-3LK5O	552.696691237795	1071.67279012535	477.174352887644	298.778187008496	1594.37908996684	1716.57579375675	GTEX
GTEX-OXRL-0426-SM-3NM97	613.582534831271	1091.45849966916	385.410367360489	363.485102958498	1631.78936628592	1589.4476305932	GTEX
GTEX-P44H-1026-SM-3NM96	576.598953534407	866.38061842352	458.175896876605	373.051424034537	1564.06856001383	1875.33837170118	GTEX
GTEX-P4PP-0426-SM-3NM9H	779.032724063715	880.974014699123	515.549225062418	452.027961610911	1590.48744933227	1256.58397212824	GTEX
GTEX-P4PQ-0426-SM-3NMCI	747.763990870959	833.5045941979	483.740151810108	348.410716494018	1564.95408618347	1545.42795901441	GTEX
GTEX-P4QS-0426-SM-3NMCQ	641.403641535434	945.894401268284	426.408801229498	321.63128416138	1629.18941043633	1741.7743806269	GTEX
GTEX-P78B-0826-SM-3NMCA	579.324508600875	990.745591583585	409.249111866372	333.06730796193	1570.77709887347	1838.09509264723	GTEX
GTEX-PLZ5-0426-SM-3P612	697.014093490927	940.932114905133	412.318657276194	414.03138038544	1577.3881281674	1616.63256496711	GTEX
GTEX-PLZ6-0326-SM-3P61J	711.973963274704	976.817623286446	458.358600401271	387.907718887164	1571.95407879231	1463.59477852356	GTEX
GTEX-POMQ-0426-SM-3P61G	781.507928702168	975.893815741703	424.579604139858	387.778204568162	1593.76844695641	1401.52307019679	GTEX
GTEX-POYW-1126-SM-48TCI	654.420959967948	987.78098945205	465.804479010364	367.521331732641	1587.45364478993	1476.25834957191	GTEX
GTEX-PSDG-1026-SM-48TCV	540.896178999934	944.804952542754	610.797237648903	293.843427167802	1564.79359807467	1676.26328167202	GTEX
GTEX-PW2O-0426-SM-48TCC	714.148778388526	917.614113082982	524.369065280424	376.472060813557	1601.49652310529	1374.49713564048	GTEX
GTEX-PWCY-0326-SM-43IRU	731.036515503543	931.970123107957	445.846965404023	378.272910328609	1575.07944241889	1493.47097096971	GTEX
GTEX-PX3G-0426-SM-48U1C	600.400142140715	1033.12751747487	410.865411286482	347.767342384434	1610.21235300081	1697.35866148245	GTEX
GTEX-Q2AG-0926-SM-48U1Q	786.841873351451	923.966797945563	457.266030707896	357.700627881968	1637.17181553321	1243.56583951467	GTEX
GTEX-Q2AH-0326-SM-48U1K	539.954942614864	996.17855609307	415.251366258058	276.955861133385	1536.56845209411	1997.88720966215	GTEX
GTEX-QCQG-1526-SM-48U25	485.481624768461	1051.92299593759	474.184893103888	453.672177337808	1480.27930411557	1922.03473267588	GTEX
GTEX-QDT8-1026-SM-43V6X	717.172111961806	969.43670650724	407.71340579362	462.659096474736	1617.21103793709	1352.79091583509	GTEX
GTEX-QDVJ-0626-SM-48U1T	646.902242149782	947.596506863215	453.836246505454	337.769895317153	1554.9079537535	1695.47522530381	GTEX
GTEX-QDVN-0226-SM-48TZ9	661.659626417323	865.314267457941	465.84200227405	351.841674753101	1607.81134888393	1644.65653432868	GTEX
GTEX-QEG4-0926-SM-4R1JO	846.594579228321	883.996512191494	468.668860372725	353.878215718076	1625.74228881849	1168.4513944847	GTEX
GTEX-QEG5-1226-SM-447AR	714.712542291588	839.111351510534	581.388995751447	382.165637636215	1617.1745178145	1324.04360802613	GTEX
GTEX-QEL4-1126-SM-4R1JJ	645.533704166832	1018.83745144678	476.953872105593	336.422510245766	1613.03172004658	1443.2606423845	GTEX
GTEX-QESD-0426-SM-4R1JZ	706.618128319433	951.504843867884	412.578258377455	413.047674874068	1544.50460052471	1543.0138485486	GTEX
GTEX-QLQ7-0426-SM-4R1JU	620.976809041456	968.976307249193	405.920844653287	405.044466129293	1560.46204539954	1693.86674027768	GTEX
GTEX-QMRM-0626-SM-447BQ	613.061765230702	898.112797774819	571.360185287843	320.138966474951	1525.47650316967	1710.61787083727	GTEX
GTEX-QV31-0326-SM-447BM	731.891279243954	825.282909846401	406.96162057056	391.47956116305	1612.34398668784	1572.86440798766	GTEX
GTEX-QV44-0626-SM-4R1KJ	805.504207142566	869.65552715539	409.235986222282	410.705026339193	1588.70254791675	1441.15856769848	GTEX
GTEX-QVJO-0526-SM-447CE	845.706797650868	805.887657478642	489.843119507277	334.602925982497	1548.59273794474	1378.65034949923	GTEX
GTEX-QVUS-0426-SM-48FE3	526.512631242989	1109.05508000154	403.958156203658	292.614056286522	1584.05721699812	1838.39479493413	GTEX
GTEX-QXCU-0926-SM-48FEP	669.123052373115	952.378945320909	606.851588715649	319.636314679659	1552.82701591506	1446.48080653065	GTEX
GTEX-R53T-0826-SM-48FCP	696.561569626098	1001.76661737177	410.294927472569	410.803896974017	1680.52503066523	1452.06392163902	GTEX
GTEX-R55E-1126-SM-48FDZ	749.852293594429	891.219792145221	492.498586074568	359.887971307699	1583.86314078674	1413.66514632785	GTEX
GTEX-R55G-0626-SM-48FDB	581.275065519371	980.395811276305	382.173657090436	355.938164178209	1660.58150737785	1720.25535146599	GTEX
GTEX-REY6-1126-SM-48FDU	698.567682451343	1013.35287226614	442.482371300026	351.032070378077	1672.78284511437	1393.02503978369	GTEX
GTEX-RUSQ-0326-SM-47JWS	781.648760972304	765.408128830939	520.41449246182	358.96400329509	1541.53814520111	1510.0927911636	GTEX
GTEX-RWS6-0526-SM-4GIAJ	690.695513809516	849.518694169153	488.321940987735	318.482422804787	1541.74540777606	1724.9457819234	GTEX
GTEX-RWSA-0926-SM-47JXW	802.402938378406	872.51568440795	498.206809796725	360.845515838199	1568.60511189028	1326.37287213375	GTEX
GTEX-S32W-0426-SM-4AD6H	769.175353930676	875.845594674196	533.307395772912	392.008764584096	1621.12224937029	1284.00995056306	GTEX
GTEX-S33H-0726-SM-4AD6M	609.788379055015	1069.52238183313	406.397654858675	324.335831398056	1598.88330575237	1661.14869666926	GTEX
GTEX-S3XE-0326-SM-4AD6L	603.146137445528	1018.97233252154	534.885755569365	340.274822812173	1530.15714665827	1655.93514208983	GTEX
GTEX-S4P3-0326-SM-4AD6P	667.258990757009	977.792537333615	473.613061773805	356.679343789676	1607.28450546495	1497.66208697068	GTEX
GTEX-S4Z8-0626-SM-4AD6J	635.230913874058	891.58205685068	527.545336111082	382.954685716796	1619.28620530169	1552.0492215253	GTEX
GTEX-S95S-0226-SM-4B656	628.113524468319	960.163692299215	465.480105459779	327.244573500344	1565.54575182877	1711.33403785769	GTEX
GTEX-SNOS-0326-SM-4DM6C	661.451176479773	999.752157131266	460.619612206571	348.182851995537	1602.0244285005	1515.95102548639	GTEX
GTEX-T5JC-0326-SM-4DM5C	841.963336590002	818.702862568912	505.699601599904	360.633093763106	1583.73973166901	1275.22811147658	GTEX
GTEX-T6MN-1126-SM-4DM71	640.165463194509	829.12310198666	506.562769574802	367.038383891032	1567.28122523757	1733.34041626534	GTEX
GTEX-T8EM-0426-SM-4DM7E	636.849156436772	919.181623829516	426.925206620018	380.443266527898	1555.75100617959	1688.7978915804	GTEX
GTEX-TMMY-1026-SM-4DXTI	708.75597469909	926.733463049275	549.41209126075	377.703571320354	1553.22314657777	1401.75715655819	GTEX
GTEX-U3ZH-0626-SM-4DXT3	750.81966171426	783.858771332992	532.215530778541	363.202023529712	1561.97346165422	1489.20950378765	GTEX
GTEX-U3ZM-0326-SM-4DXUJ	616.989631148096	956.222782183744	514.251930465028	362.848319121632	1613.64207672598	1541.52913493788	GTEX
GTEX-U3ZN-0526-SM-4DXTH	529.208157071138	1051.73587449722	465.631287408507	329.689590632614	1609.20134822402	1754.35598272499	GTEX
GTEX-U8XE-1226-SM-4E3HN	675.145531848188	923.984243779811	448.206667632066	367.772147330218	1556.29983192914	1661.87652284514	GTEX
GTEX-UJHI-0226-SM-4IHJL	662.129709625584	965.740048995984	485.907740014811	383.930213050836	1569.43154039813	1488.65390237058	GTEX
GTEX-UJMC-0626-SM-4IHJQ	552.075289375947	919.124050143508	480.473314316976	360.072955962377	1557.96781152461	1860.45523445888	GTEX
GTEX-UPIC-0526-SM-4WWCQ	714.477145649795	960.230867572098	484.702751609444	351.778046985494	1563.27371701481	1479.61881263418	GTEX
GTEX-UPJH-0926-SM-4IHKA	712.067007065231	858.577028405358	480.176373456344	330.857015865473	1611.62498555394	1507.96254764103	GTEX
GTEX-UPK5-1526-SM-4JBJA	664.003474043927	915.282383292278	414.960312527111	384.837825931312	1613.25274850575	1592.14398376894	GTEX
GTEX-V1D1-0326-SM-4JBIY	557.150129746309	1027.89962469453	391.852509211784	392.61608078408	1492.58696720558	1960.42795187472	GTEX
GTEX-V955-0926-SM-4JBJ8	729.973959576089	751.827087060514	511.964110634649	376.240802258788	1539.57645309709	1575.53566136389	GTEX
GTEX-VJYA-0226-SM-4KL1Q	510.781750502173	939.835470461524	516.774012546475	353.473597524765	1555.46933182408	1911.02653680311	GTEX
GTEX-VUSG-0526-SM-4KL22	680.665422483024	953.508270736351	426.941680074976	356.058920950933	1622.95322978877	1539.64790386649	GTEX
GTEX-WFG7-0926-SM-4LMK7	650.45274503083	992.756572990043	429.354650148835	345.955290398534	1624.28732942656	1595.15754758407	GTEX
GTEX-WFG8-0826-SM-4LVN5	595.504739822754	1081.58577001698	435.334421739875	326.231538460515	1634.09350192787	1602.48560214159	GTEX
GTEX-WFON-0526-SM-4LVLY	680.491237411126	975.215876144294	454.496028915491	348.554168915516	1573.62290192525	1542.7246883343	GTEX
GTEX-WH7G-0626-SM-4LVMO	621.231713128445	947.803376949612	416.00328216291	355.612042934134	1548.93995709077	1779.44042804135	GTEX
GTEX-WHWD-0526-SM-4OORW	659.265157663791	1050.61534428327	507.018310007546	334.871030262704	1614.95274020459	1382.77058752379	GTEX
GTEX-WQUQ-1526-SM-4OOSM	669.016708981978	910.354993782735	480.303203908336	299.962229866233	1577.77354766051	1632.33406883715	GTEX
GTEX-WRHU-1326-SM-4E3K7	702.274499670626	947.97930113247	393.136290163436	372.665495993463	1609.12187260099	1606.19837210714	GTEX
GTEX-WZTO-1626-SM-4PQYR	822.035475710882	874.061917707883	463.6518976614	373.2995971768	1638.34104390221	1227.87650589244	GTEX
GTEX-X3Y1-0326-SM-4PQZ7	765.264608626528	904.839981053486	451.49638025733	401.15657010916	1573.98355869217	1397.78578277285	GTEX
GTEX-X4EO-1026-SM-4QARP	610.289189517569	881.440516899183	465.41558868107	329.302638884525	1598.20045580752	1764.16185564101	GTEX
GTEX-X4EP-1426-SM-4PQZP	756.526778953385	788.477320655701	504.194510336019	408.419846237019	1609.93932604778	1408.08621555863	GTEX
GTEX-X4XY-1526-SM-4QASE	607.342357615018	990.766529335574	466.708172113417	334.307612942623	1531.99378761793	1764.45506001544	GTEX
GTEX-XBED-0726-SM-4GIAR	583.824343075375	1018.20718231699	419.516943013772	391.753391202708	1562.05469073952	1757.09486091413	GTEX
GTEX-XBEW-0526-SM-4QASO	703.123013083981	919.21125198163	469.599888873064	382.781054362729	1556.16850132931	1484.83246503197	GTEX
GTEX-XPT6-0326-SM-4B66V	602.144173793516	1000.10561096558	581.523004214087	333.077932254251	1592.55923859221	1561.99233500084	GTEX
GTEX-XQ3S-0126-SM-4BOO9	787.147749517896	900.890477334862	409.703649663256	366.219677996368	1596.76549356323	1413.49354003491	GTEX
GTEX-XQ8I-1326-SM-4BOPV	652.620138848392	978.344179469892	436.310414592858	323.355097318912	1576.70235974838	1624.74768770837	GTEX
GTEX-XUJ4-0326-SM-4BOP9	683.895827652465	853.17056784898	513.573099885857	318.39276240234	1536.53794632194	1639.32085998574	GTEX
GTEX-XUW1-1126-SM-4BONZ	614.674369915149	876.33552402265	455.097910225723	392.61614672399	1588.68404054215	1738.11357910205	GTEX
GTEX-XUZC-0626-SM-4BOPG	624.877688890444	908.996573722093	479.230572941646	375.594307402033	1535.82116297496	1742.66416188922	GTEX
GTEX-XV7Q-0526-SM-4BRWR	751.671775006208	929.988532051737	463.553238597753	396.755905855717	1588.77686539489	1428.49660491958	GTEX
GTEX-XXEK-0726-SM-4BRWF	688.615745920205	939.432729451841	470.471810259658	335.958561925273	1582.31137890543	1505.3464779089	GTEX
GTEX-XYKS-0426-SM-4BRW4	561.756368138223	1010.48527849467	546.338098059702	335.150430826427	1633.84349814012	1626.64259434273	GTEX
GTEX-Y114-0426-SM-4TT6V	608.839416355514	937.100354081929	492.074245473295	344.040220000491	1500.4878715967	1819.73275028228	GTEX
GTEX-Y3I4-0326-SM-4TT28	622.855559482118	1002.06534383428	478.375383840411	380.248095849239	1617.75631509853	1583.38723475626	GTEX
GTEX-Y3IK-0726-SM-4WWE5	670.099390606272	952.33364771576	464.621802238647	378.210140667514	1598.57902976999	1552.52150931282	GTEX
GTEX-Y5LM-0226-SM-4VBRM	614.584859348889	1005.75561670998	437.472658785103	377.154651105673	1619.95357378785	1596.54659952245	GTEX
GTEX-Y5V5-0426-SM-4VBPU	563.92340872674	1048.86744370651	497.757935147439	319.991096656054	1624.70763648213	1631.08708731866	GTEX
GTEX-Y5V6-0426-SM-4VBRZ	475.112011584501	985.658113853935	509.434536679825	395.228958869906	1451.05019869356	2038.51841508223	GTEX
GTEX-Y8E4-1126-SM-5IFIA	581.507676779232	985.07638326068	518.09133722235	367.003612661726	1583.3169838233	1634.08299483285	GTEX
GTEX-Y8LW-0426-SM-4VBQ6	547.026872085053	1001.07758267736	517.560365656185	347.030776895045	1593.38089564296	1677.60387983643	GTEX
GTEX-Y9LG-0226-SM-4VBS4	553.746264937957	993.775081543575	390.154967409102	354.505460619169	1538.33808133554	1914.09152775481	GTEX
GTEX-YB5K-0326-SM-5IFJQ	571.000906919826	982.104701130129	455.599517867254	373.357932959138	1611.92634894836	1778.28054285941	GTEX
GTEX-YEC3-0526-SM-5IFHN	604.613946819704	1018.05029416886	435.06001507848	341.115796856676	1564.34807212779	1743.71199106086	GTEX
GTEX-YEC4-0726-SM-5CVLV	722.96033907543	889.311050640795	545.027300740051	333.016187411669	1534.01577593537	1478.61800986161	GTEX
GTEX-YECK-1326-SM-4W1ZF	664.183755504395	930.27164393073	437.094145890238	356.82611420932	1641.64507494595	1579.3397418886	GTEX
GTEX-YFC4-0326-SM-4TT3U	584.379232429229	983.532472328181	383.237208363236	343.206625260438	1636.28704044761	1787.84138894779	GTEX
GTEX-YJ8O-0226-SM-5S2NL	813.749695503201	895.425766006519	420.588675481199	376.628436356669	1652.35196037596	1244.48516191949	GTEX
GTEX-Z9EW-0126-SM-5CVM6	654.427059054589	975.418850861536	470.426001690743	360.224802152392	1578.57797889449	1588.89160556331	GTEX
GTEX-ZA64-0126-SM-5HL8Z	666.143005404701	931.965154182119	482.064952884271	329.149161241042	1539.97106795012	1703.81637596464	GTEX
GTEX-ZAB4-0526-SM-5HL7Z	595.070201016928	888.600506942688	456.031812295599	356.883620736544	1586.62555424467	1828.04280111867	GTEX
GTEX-ZAJG-1226-SM-5S2MH	611.530460462355	909.46277678699	337.586630443917	375.117124329111	1552.02722286069	1873.82491686071	GTEX
GTEX-ZAK1-1226-SM-5Q5AA	879.815743875441	846.5855456465	496.593960650261	372.187426019841	1623.67970106904	1126.99425770829	GTEX
GTEX-ZC5H-1026-SM-5CVN1	724.170617208698	804.703617833136	457.27683141533	393.411358617325	1651.09035198382	1519.99663925479	GTEX
GTEX-ZDTS-1426-SM-5K7WC	615.799211346511	979.491939337915	412.415575458666	301.13392431272	1618.31844631332	1743.99163086548	GTEX
GTEX-ZDYS-0526-SM-5L3EE	740.477933651729	950.695694473417	422.190129751738	369.28500885881	1599.64498790988	1491.02619618572	GTEX
GTEX-ZF2S-0926-SM-4WWBJ	657.278031438677	923.660446560921	439.73232068354	369.50966010973	1633.65777547086	1616.42625023595	GTEX
GTEX-ZF3C-1426-SM-4WWCD	617.002748211301	969.758688822322	422.154792725395	372.670816658374	1643.47813663095	1598.58591286647	GTEX
GTEX-ZG7Y-0126-SM-4WWEX	476.61293062706	1026.2716602078	515.050846279686	251.36281116502	1526.33138397199	1993.44648966107	GTEX
GTEX-ZP4G-0526-SM-4YCED	458.503887609566	998.26166118687	532.433097727786	356.173504877105	1519.71273773718	1959.64660726016	GTEX
GTEX-ZQUD-0226-SM-4YCEB	689.449740292502	969.11951908755	480.518258540026	393.31276956158	1620.646923567	1454.77659998833	GTEX
GTEX-ZVT2-0726-SM-5GIER	581.867184743673	954.276669967996	465.480326075468	345.795805138702	1544.4591763477	1846.13849660008	GTEX
GTEX-ZVZP-0126-SM-5NQ6Q	535.717911718189	885.070689653332	530.365774071063	299.097380837935	1510.66799460273	1965.15305036615	GTEX
GTEX-ZYFD-2126-SM-5E43D	633.072183002354	927.825123756507	565.144623497213	275.563401099065	1540.55253037376	1684.58953143294	GTEX
GTEX-ZYFG-0326-SM-5E45Z	625.644310230608	949.904786189995	538.413706965472	348.796890124798	1593.38777790491	1552.43234815715	GTEX
GTEX-ZYW4-1226-SM-5E45B	693.631757758066	991.123474642131	509.631153670883	337.881467877087	1540.52061560343	1496.09142235824	GTEX
GTEX-ZYY3-1226-SM-5EQKM	614.363323182375	975.664610384159	458.027030822504	332.055575651899	1633.50788957476	1625.28310641274	GTEX
GTEX-1117F-0626-SM-5N9CS	655.759620336524	1241.1408383393	296.443324384066	404.264621339874	1615.45611147131	1488.5057886696	GTEX
GTEX-1122O-0426-SM-5H12G	683.99475812818	998.058096636164	455.23059506145	395.707550977256	1621.6327981616	1431.10667472755	GTEX
GTEX-117YX-1726-SM-5GZZS	476.450956836817	1113.32945618693	385.262725825591	353.572594682632	1561.69741724299	1958.07371672002	GTEX
GTEX-11DXX-0826-SM-5GZZP	588.879672033687	1022.88532788177	452.550613093389	373.999617832676	1638.56939221169	1604.22263998099	GTEX
GTEX-11DXY-1126-SM-5987W	508.57732222728	1054.84825210253	455.733802208443	326.78869171241	1456.75516149019	1951.62324259682	GTEX
GTEX-11DXZ-0526-SM-5GU7J	563.906917051632	942.175054308973	345.871261753085	367.059273084481	1581.30214367704	1984.7472022947	GTEX
GTEX-11DYG-0926-SM-5EGGW	807.487567304726	1097.16134982242	428.814152874348	465.147056160939	1583.97997110438	1139.71588213603	GTEX
GTEX-11EM3-0526-SM-5H12N	715.881183345859	1011.43243558166	493.725915109068	408.970227593029	1618.1493918568	1319.35671228714	GTEX
GTEX-11GS4-0626-SM-5A5LC	522.122658082664	1011.72382400005	379.459391344714	284.600052336311	1594.43463422665	1992.91025396371	GTEX
GTEX-11I78-1026-SM-5HL74	705.317920697474	1119.88350446064	439.929528418109	425.214932543997	1568.51270276833	1368.75749749091	GTEX
GTEX-11ONC-1126-SM-5GU6G	636.906889000197	981.743897496577	311.423790635383	374.942651470639	1653.48958134066	1767.3375330772	GTEX
GTEX-11TT1-1526-SM-5EQKU	628.236189299711	1025.23373996206	450.875463842457	421.687243009008	1645.29891467963	1440.60315790037	GTEX
GTEX-11UD2-1126-SM-5EQM6	745.496843259303	890.482006582014	440.115461513166	383.417331108692	1700.83215452191	1353.81238668178	GTEX
GTEX-11ZTS-1026-SM-5LU8O	790.001911182764	1039.18122440131	387.319017788675	449.194184151006	1716.68517822729	1126.15610934333	GTEX
GTEX-11ZTT-0426-SM-5EQLK	555.272394053419	1084.17248864513	354.876452167295	358.460653369813	1614.30905199137	1834.98220728241	GTEX
GTEX-11ZUS-0526-SM-59884	786.066226543534	1168.75429743645	361.100389448547	446.154497963516	1636.86737945058	1190.70350897324	GTEX
GTEX-12696-0526-SM-5EQ3Z	664.254939359125	956.996523066297	441.303256957473	355.98467450803	1558.79309287206	1655.65287450081	GTEX
GTEX-12WSC-0926-SM-5EQ63	864.603246667825	1042.14199144336	339.018948560643	483.114314089517	1674.66225447973	1037.04817413952	GTEX
GTEX-12WSD-1026-SM-5EQ42	742.808460712167	788.739006442666	437.096296589838	389.698138505605	1608.71576685653	1594.48341342379	GTEX
GTEX-12WSK-0726-SM-5LZUV	779.44739150227	996.266223102595	386.940534111117	431.741641151158	1615.54562237081	1390.3399799791	GTEX
GTEX-12WSL-0926-SM-5N9EK	722.784350955506	1179.58156887742	427.102728969693	431.462402490589	1574.0522399933	1343.08174985775	GTEX
GTEX-12ZZX-0626-SM-5EQ46	830.588223894394	1142.31847684844	380.814309332148	478.705864878192	1630.58826607434	1090.12922765156	GTEX
GTEX-131XF-0526-SM-5HL87	532.916697200988	1072.65179567348	382.202214723861	352.135987869589	1521.71854865217	1977.62088374502	GTEX
GTEX-131XG-0826-SM-5LZVS	550.781953118743	1051.63022122166	430.006449517418	437.449406434225	1388.39120963734	2042.29462843809	GTEX
GTEX-131YS-1226-SM-5K7VE	631.043518372114	954.020742133979	437.644884400751	346.127033055821	1587.47748241195	1772.85695714398	GTEX
GTEX-132AR-1326-SM-5K7YC	601.083963417734	1103.0446472754	479.650308095388	394.126619838886	1614.13333728109	1499.7045847067	GTEX
GTEX-1399R-1826-SM-5J2M9	688.502617791562	1113.2014601414	363.391205925531	456.233480977069	1627.08053304397	1468.61017694164	GTEX
GTEX-1399S-0926-SM-5PNVQ	529.494554123495	959.268066653427	396.889394725742	391.572419040356	1432.34727578894	2207.92810758236	GTEX
GTEX-1399U-0626-SM-5J1NZ	580.609133528719	1157.25150167071	384.318572388513	363.015957415055	1579.76445816642	1683.27250261263	GTEX
GTEX-13CF3-0626-SM-5J1NO	715.765385393968	875.237450845434	463.86939622667	399.8680746157	1582.56444187779	1514.46623571595	GTEX
GTEX-13FH7-0426-SM-5KM4M	573.950792206847	1088.82561700775	440.948239053023	337.438632072024	1554.3808831741	1827.63553860108	GTEX
GTEX-13FHP-1126-SM-5IJDO	502.223157561339	1047.18640502629	400.487328274513	310.169313652405	1556.25094561935	1997.46512837125	GTEX
GTEX-13FTW-0926-SM-5J2NJ	597.814783658173	980.043005665088	425.071586522447	347.280797865845	1632.3593401035	1734.66114796186	GTEX
GTEX-13FXS-1126-SM-5IJBB	744.365337741584	1050.60438882948	367.919094956795	386.811135552697	1697.80263579069	1293.00832319604	GTEX
GTEX-13N11-0626-SM-5J1OL	836.32988017123	977.975749251311	417.376159774343	455.235809263839	1590.61197517118	1190.22771410494	GTEX
GTEX-13NZA-1126-SM-5MR4K	783.581721146948	1003.34403527514	361.444904046961	491.302992475286	1536.53904026455	1503.93457531796	GTEX
GTEX-13O21-2926-SM-5J1OU	541.732650492375	1081.99620868993	332.879447428317	364.083565296396	1598.30358579093	1863.99709945474	GTEX
GTEX-13O61-0626-SM-5L3D1	665.768320453746	1092.71164892036	385.876361583163	362.238112050581	1624.38372681377	1529.30064842583	GTEX
GTEX-13OVG-0726-SM-5IJBY	471.371439017961	1118.14304958075	425.026304348598	327.652898963206	1503.14353645458	1995.33647891434	GTEX
GTEX-13PL7-1826-SM-5IJDV	700.951278418013	1044.3018858929	441.912353261916	473.454352278061	1588.89901332352	1478.16426834772	GTEX
GTEX-13PVR-1126-SM-5S2NX	619.548537876949	919.503321482984	334.55294966754	350.441831849561	1564.21600311674	1870.49641436626	GTEX
GTEX-13QBU-0126-SM-5LU3V	627.329041345822	1113.61159768056	410.630062021436	409.656414553102	1547.68533414182	1660.86256113937	GTEX
GTEX-13QJC-0626-SM-5S2O9	681.429559184983	1127.46736762716	362.576142073732	384.002009125642	1650.20639695028	1369.05951228994	GTEX
GTEX-13RTJ-0626-SM-5S2NB	631.457163125104	1014.90621434201	449.964650316209	321.888778994971	1513.1053496231	1741.73939756668	GTEX
GTEX-13S7M-2226-SM-5S2WB	782.779515038972	891.51562459399	382.20460163923	410.724497527268	1633.74972057611	1422.9819964518	GTEX
GTEX-13S86-0526-SM-5QGPZ	580.919127644036	1048.69777505493	536.766115596849	381.53341250429	1528.12186469814	1678.015632884	GTEX
GTEX-13U4I-0926-SM-5LU5A	616.409093357471	946.524109247002	426.222403932259	381.748391258562	1670.04411497375	1655.20906943336	GTEX
GTEX-13VXT-1026-SM-5LU37	613.153921693355	1243.21848694174	494.234922696117	431.486610598718	1416.9298975023	1566.01112444083	GTEX
GTEX-13VXU-1926-SM-5LU5J	616.514206015844	1025.17568374443	425.802032703329	333.324029866694	1660.44409708902	1575.76682371392	GTEX
GTEX-13W3W-0626-SM-5LU45	599.509366609585	1157.63447044599	414.383962800461	399.435408948795	1622.98923732139	1514.2338051587	GTEX
GTEX-13X6J-1326-SM-5QGOV	671.403276747014	975.330628572276	515.998615907202	383.483854863616	1631.26837653011	1493.31367223272	GTEX
GTEX-1445S-1126-SM-5QGOW	573.365664044937	1215.68533260793	291.756237750397	380.304611252397	1564.26665273893	1714.96966092735	GTEX
GTEX-146FH-0926-SM-5SI96	593.430356456117	1081.86627856026	391.796103901599	401.189655265455	1658.79502528826	1615.24022879044	GTEX
GTEX-147F4-1326-SM-5LU9V	680.305243032953	962.049900194115	444.470521353819	358.718556709152	1668.07461954517	1428.91453211041	GTEX
GTEX-14C38-1226-SM-5S2UK	691.979452021287	975.621101901994	315.694897270303	359.944507433015	1648.48248964356	1679.19124506145	GTEX
GTEX-14C5O-1426-SM-5RQI8	683.096053115083	982.694748506367	398.781477456532	353.646338856546	1630.82309458314	1514.95290214541	GTEX
GTEX-14E1K-0926-SM-5S2U4	753.206028281918	1239.29021548248	318.668373215453	464.13180119957	1563.78507821602	1324.40242663747	GTEX
GTEX-NPJ7-1326-SM-3MJHO	846.187469770283	1110.08720975735	445.005985626355	498.177336336288	1612.42005556998	927.60555676929	GTEX
GTEX-NPJ8-1326-SM-3LK6B	908.891401290973	958.381637826611	407.03433534834	498.251355918449	1507.88512868007	1277.07299157157	GTEX
GTEX-O5YV-0426-SM-3LK66	579.426230886401	1052.01316291115	363.54651163269	335.27609153727	1613.14610439938	1781.22021548876	GTEX
GTEX-O5YW-3026-SM-3MJHI	503.076301201072	1068.60136837519	391.862253815399	374.343823189914	1583.53671868021	1903.00103292231	GTEX
GTEX-OHPL-3026-SM-3MJGS	719.66712903579	990.384667823464	424.031843240799	386.82700492485	1672.58131775015	1444.8394596479	GTEX
GTEX-OIZH-3026-SM-3NB1G	621.911381727517	1004.74002886601	374.214093292607	356.195162888486	1637.079461736	1688.18193311596	GTEX
GTEX-OOBJ-3026-SM-3NB1D	595.054199406097	1033.48651170294	379.706698812326	382.242147286227	1603.41357276045	1715.9795391636	GTEX
GTEX-P4PP-3026-SM-3P61O	679.927373999575	1197.07275985045	322.373818507721	399.071505639508	1580.19180134829	1574.25106966846	GTEX
GTEX-PSDG-0826-SM-48TCZ	721.036981206243	1087.8083861121	447.175467691249	385.836617268763	1566.0490465397	1334.97101617274	GTEX
GTEX-PWCY-0426-SM-48TCW	732.322876203782	926.95559585933	478.374138026928	392.93590585535	1608.1947060069	1353.22109346038	GTEX
GTEX-PWOO-0426-SM-48TZF	597.65889121675	1105.01257648599	431.840080297943	417.046826044584	1561.37687319674	1654.09515682454	GTEX
GTEX-PX3G-3026-SM-48TZR	503.179451117847	1155.55526022588	362.195351017616	311.960454158074	1528.83789140622	1957.02747625536	GTEX
GTEX-Q2AH-0626-SM-48TZJ	452.03113836328	1126.66402903396	420.59901192511	337.801177589517	1466.72860745817	2102.66709321254	GTEX
GTEX-QDVN-0126-SM-4GIC9	573.887274142142	1053.68349479083	403.939529405966	395.42053243822	1616.93296542556	1682.85808262114	GTEX
GTEX-QEG5-1026-SM-4R1KT	614.195121106026	1059.42240983072	445.008375442034	408.386984709244	1666.21366681465	1448.99788150087	GTEX
GTEX-QEL4-1026-SM-4R1JK	677.647381232723	1060.29286789361	392.980819812985	370.608993324499	1671.80248561748	1400.68113379123	GTEX
GTEX-QESD-0326-SM-47J4F	692.140117430867	1052.27666029332	370.019108399345	430.209966754801	1580.45765876095	1561.49131835695	GTEX
GTEX-QLQ7-0326-SM-4R1JV	479.293798375234	1049.04266679463	403.713835265439	366.47604954668	1507.55921129399	2048.00186936026	GTEX
GTEX-QMRM-0426-SM-4R1K2	684.095338193853	1052.62584867819	406.443640284988	379.295953832418	1622.74425248327	1509.26744408814	GTEX
GTEX-QV44-0726-SM-4R1KP	775.665152641715	1014.08088026988	418.113263230773	423.481444480957	1607.72746186955	1339.1659113703	GTEX
GTEX-R53T-0726-SM-48FCS	666.127245157905	1021.22987466538	416.304762571552	356.70939990522	1670.79963619525	1535.46601621496	GTEX
GTEX-R55G-0426-SM-48FDH	577.182256687095	1009.9231853641	458.421597171937	404.656789859689	1652.01784783218	1608.73057690031	GTEX
GTEX-REY6-0926-SM-48FDA	676.242534214136	1252.28717990722	449.273610025682	387.577066980088	1580.05175782725	1232.48109681872	GTEX
GTEX-RN64-0726-SM-48FCV	740.556400965855	1020.8064203183	400.846408895646	366.199656637662	1699.83486519995	1216.60592474458	GTEX
GTEX-RTLS-0726-SM-46MV4	727.179468746839	1063.35301268008	382.1399790041	407.307758166374	1660.90401217596	1370.17913662086	GTEX
GTEX-RU72-0226-SM-46MUD	578.027950847844	1075.19361884945	383.798515208999	351.648138399088	1663.70952288697	1639.37562823435	GTEX
GTEX-RUSQ-0426-SM-47JWR	547.658723473832	1003.60985469389	397.786603671044	330.705040954292	1488.12406290048	1985.14292271467	GTEX
GTEX-RWS6-0426-SM-47JXH	687.59178574844	706.385347440428	549.468634955619	312.114227005402	1489.4518214554	1794.34847374228	GTEX
GTEX-S3XE-0226-SM-4AD6I	569.497703008059	1040.43989023423	473.196874089897	326.719160050153	1567.71146693513	1739.35734248473	GTEX
GTEX-S4Z8-0926-SM-4AD6Q	680.80314834218	993.895273410448	457.902797359518	342.105663199637	1626.9305911396	1448.34299829714	GTEX
GTEX-SE5C-0426-SM-4BRUI	566.555230587352	1008.119444311	509.689545891282	358.854499072657	1577.55607802235	1696.59312024257	GTEX
GTEX-SIU7-0226-SM-4BRX2	439.101200891128	1063.01020645946	422.701907948205	445.458728520603	1360.48779674134	2247.32236879538	GTEX
GTEX-SNMC-0226-SM-4DM6F	672.679661555853	916.05857037166	397.024064582383	363.966883628196	1610.99950168496	1648.10298675244	GTEX
GTEX-U3ZH-0426-SM-4DXSE	535.136774184616	1004.05727823043	425.602102641949	312.717866266702	1604.32746498829	1819.90067363853	GTEX
GTEX-U3ZN-0426-SM-4DXSH	572.649629036208	994.139703592422	394.394843388881	374.741388859647	1601.22153441568	1769.56349208159	GTEX
GTEX-U4B1-0226-SM-4DXU8	520.719361382604	976.322187922235	474.068805756853	364.268272282013	1544.42728523878	1889.37085046901	GTEX
GTEX-U8XE-1026-SM-4E3HM	597.274393503579	956.62384268931	425.638923078535	366.595506890117	1614.41797941401	1723.61136091829	GTEX
GTEX-UJHI-0326-SM-4IHJE	699.151219962363	961.986886317103	392.816420165577	397.377080037355	1644.14010044542	1482.19115961441	GTEX
GTEX-UJMC-0426-SM-4IHJF	506.549514621023	871.140822163948	528.082017781276	403.14737344817	1409.61429056207	2100.38820559429	GTEX
GTEX-UPIC-0326-SM-4IHJ9	789.935883730254	1010.07047841205	477.650565702772	456.724518643697	1551.77734858619	1160.64736946296	GTEX
GTEX-UPK5-0126-SM-3GADM	736.962175429129	1048.02326688429	332.375125870735	408.137848286966	1604.39343737799	1445.04803293964	GTEX
GTEX-VUSG-0626-SM-4KL1Z	632.494162524362	959.056869822922	419.736625085995	330.566667324572	1658.57977898205	1614.41898657766	GTEX
GTEX-WEY5-0326-SM-4LMI7	537.597456474008	1215.120060081	406.023769265767	397.550991498673	1404.7630464204	1836.83738242491	GTEX
GTEX-WFG7-0626-SM-4LMK6	678.960697462898	1001.70285373304	475.260311579026	351.958095935693	1559.94571892021	1533.10587472049	GTEX
GTEX-WHWD-0226-SM-4OORT	692.916744961338	920.202679212282	510.957940793521	357.850221935296	1642.48147673513	1393.12537143788	GTEX
GTEX-WRHU-1126-SM-4E3I1	725.102807274394	1092.80290043978	335.229907547347	424.651393043483	1692.21728859794	1326.87088924958	GTEX
GTEX-X5EB-0326-SM-4QASF	472.410271893888	1131.93104126347	434.779873008889	293.2308496808	1515.65454893262	1998.07245719486	GTEX
GTEX-XGQ4-0626-SM-4AT56	722.76450331678	1112.57686664845	432.23427917643	381.899012589232	1527.68148278094	1486.52267466542	GTEX
GTEX-XPT6-0426-SM-4B672	553.954735042406	1006.88432457204	475.590404586148	425.761720155036	1541.68390432192	1789.09192605628	GTEX
GTEX-XPVG-0926-SM-4B651	840.141862579654	786.452693098449	503.670016359222	395.810328939986	1549.1844401838	1381.90805299611	GTEX
GTEX-XQ8I-0326-SM-4BOPN	692.161523157821	1141.2157365322	439.922844258068	399.935155756124	1528.22547880359	1405.27884829897	GTEX
GTEX-XV7Q-0626-SM-4BRV5	780.560686005157	781.924555729609	524.410415312811	374.370052658556	1573.72950004075	1422.42512048705	GTEX
GTEX-Y114-0326-SM-4TT99	578.156907151635	996.159420190828	454.747218199841	368.247380003825	1581.22996606196	1731.00792415947	GTEX
GTEX-Y3IK-0926-SM-51MQU	586.590497255032	965.51340969088	395.708407676023	380.965000528966	1617.28862993757	1849.71078500689	GTEX
GTEX-Y5V6-0326-SM-4VBRW	557.969623888207	1051.15888831236	405.071892894977	349.797026028265	1623.03787145049	1747.61594891027	GTEX
GTEX-Y8E4-0226-SM-4VBQ3	566.810269406622	1105.01216336774	400.391064437451	336.720016989368	1629.70714965089	1670.17453059399	GTEX
GTEX-YEC3-0326-SM-5IFJJ	655.675483985648	1240.95066249957	398.767115051294	449.540871269739	1521.74447082155	1463.08075913215	GTEX
GTEX-YEC4-0426-SM-4W1ZH	629.354349858354	1016.17302501	406.746809941312	339.336912940261	1588.06137975134	1725.25395249081	GTEX
GTEX-YF7O-0226-SM-5IFJ4	535.789699284824	1172.93853058008	357.607302281308	371.4272111916	1538.43832009261	1836.44703583278	GTEX
GTEX-YJ8O-0126-SM-5QGRG	799.478547176853	1023.30155740381	368.416277117353	445.236459848442	1677.57341558047	1212.06235908051	GTEX
GTEX-ZAB4-0726-SM-5HL8I	761.815745984688	1023.58288365263	407.211904328167	466.716415052392	1638.83428350006	1326.66808933447	GTEX
GTEX-ZDYS-0126-SM-5HL6X	546.903320937514	1117.29863787989	342.038527885506	375.630806457371	1585.26438983983	1912.06956954182	GTEX
GTEX-ZF3C-1326-SM-5A5MF	583.665863145253	1135.60110001209	354.02312646792	407.863593393207	1662.98891082473	1622.2597571038	GTEX
GTEX-ZGAY-0426-SM-4WWAM	625.594940932459	1117.20030344985	419.804012380322	390.557960978766	1623.34668943839	1467.09925505703	GTEX
GTEX-ZLFU-0126-SM-5EQMN	528.194439720821	909.684106467457	493.833342969976	415.542527760619	1498.42059458104	2028.50765218312	GTEX
GTEX-ZPCL-0326-SM-5FQSG	521.094502838393	1098.96244498838	408.11331816392	348.009152422561	1550.04919104167	1881.32506687106	GTEX
GTEX-ZPU1-0526-SM-4YCDA	439.705650947326	966.234327952704	405.648199562132	358.916746336438	1500.1996302265	2226.14200728901	GTEX
GTEX-ZQG8-0626-SM-57WF3	517.608098910676	1222.03380487769	355.025962352862	394.781527665776	1400.12900756744	2040.7112152275	GTEX
GTEX-ZT9W-0426-SM-57WF4	598.511624495763	1108.21849557071	423.222706747857	369.021170803253	1541.05116060748	1685.33960337177	GTEX
GTEX-ZUA1-0426-SM-5NQAF	655.059710041858	1204.47756049601	341.782422250045	411.46346139683	1651.8613163168	1387.49368812051	GTEX
GTEX-ZV7C-0426-SM-51MQY	643.410053469648	1126.77297172049	402.584534274675	319.567581696762	1584.14764717045	1568.60303665198	GTEX
GTEX-ZVT2-0526-SM-5E455	666.759424091019	1082.89140513018	425.997027054169	382.469273562588	1616.64564473867	1446.79805423606	GTEX
GTEX-ZYFC-1226-SM-5GIE4	799.159280839236	1034.7686109624	452.772956480857	468.790951726085	1693.99272780403	1041.37280657574	GTEX
GTEX-ZYFG-0126-SM-5GIDH	696.718924875028	1104.6744390338	451.607253553555	466.251439469631	1580.54302868213	1339.28419730165	GTEX
GTEX-ZYT6-0826-SM-5E43I	742.164176681707	1099.82662435826	484.930785139237	416.855315126664	1697.21608339304	1061.38303297518	GTEX
GTEX-ZYWO-0426-SM-5SI9A	640.50613825489	1076.85982653035	398.123550751796	373.506046624909	1661.23169405823	1565.26612531697	GTEX
GTEX-111FC-0426-SM-5N9CV	749.544132811993	945.484263648074	413.106939192326	356.917253260875	1705.53617861939	1305.12065805929	GTEX
GTEX-111YS-2226-SM-5987P	659.004484701529	1082.1791205465	483.06772366438	332.693101994036	1612.11538045853	1377.97988888752	GTEX
GTEX-1128S-2526-SM-5H11N	581.541006661312	1123.82998849838	441.213152846293	335.705712646413	1570.83039428297	1622.81730351878	GTEX
GTEX-113IC-0426-SM-5HL5O	577.775029278577	1110.23951104506	346.161464088557	352.431561542852	1650.05885461362	1703.73798699326	GTEX
GTEX-117YX-2626-SM-5EQ53	759.380683542695	970.231408830776	511.136854654215	381.320611813446	1619.10314692957	1199.95789270097	GTEX
GTEX-11DXW-0526-SM-5H127	814.608737986707	880.588429485445	437.966021644741	467.232056305563	1665.84887405988	1176.01397510019	GTEX
GTEX-11DXX-2626-SM-5Q5A3	805.188108742343	906.392190385481	432.992034519461	386.618759459036	1628.76800881467	1298.04299646727	GTEX
GTEX-11DXZ-2626-SM-59882	722.673069104462	977.853062433828	484.277147249617	367.206054091591	1656.45386272123	1269.81230035011	GTEX
GTEX-11EI6-0526-SM-5985S	723.011463459315	767.187439566768	495.806894671611	404.540191136675	1707.99704233264	1428.97916355197	GTEX
GTEX-11EM3-2226-SM-5H11Y	843.471747188334	868.045120673033	571.565816595333	403.978857735715	1580.1074191657	1026.12256567067	GTEX
GTEX-11EMC-3026-SM-5EQ4R	744.099768706649	1043.49286479339	399.543327524511	418.285332207513	1607.77188704932	1293.04040767404	GTEX
GTEX-11EQ8-0426-SM-5N9DP	747.796011551026	895.313764133544	339.885661177096	433.962693682454	1647.54477263221	1507.6794996953	GTEX
GTEX-11EQ9-2226-SM-5987H	771.261978138624	886.558257534858	490.24274074324	382.900143508493	1584.94484993909	1314.39784581098	GTEX
GTEX-11GS4-2926-SM-5A5LF	553.219251433782	991.145989390142	410.565694021996	318.750680291137	1617.57485761735	1847.27567947487	GTEX
GTEX-11GSP-2926-SM-5N9C2	754.432492366017	968.626432154288	438.291080291225	338.95659029681	1632.93834929691	1352.52405041584	GTEX
GTEX-11I78-2326-SM-5Q5AH	728.180533680011	1039.00752509994	422.966292020156	410.032090677384	1584.18575555729	1404.34372386933	GTEX
GTEX-11LCK-1426-SM-5HL5R	756.653599239917	910.017726342393	423.844386574845	424.771462411238	1657.09751185729	1320.68662607889	GTEX
GTEX-11NUK-0526-SM-5A5L5	834.188892630491	931.513042809785	425.52073271079	413.468237838473	1683.38601853823	1113.49205302068	GTEX
GTEX-11NV4-0526-SM-5N9BF	910.707571611859	687.726734967537	448.489627127108	437.046727046795	1669.50658431154	1219.24242815123	GTEX
GTEX-11O72-0426-SM-5BC5B	781.251666437458	1051.49222304592	398.150140604386	391.766471483436	1673.96567695554	1193.13901134461	GTEX
GTEX-11OC5-0426-SM-5Q5AR	874.950177791251	777.777097146945	391.848868161884	379.765791227373	1672.87381659063	1259.75401626258	GTEX
GTEX-11ONC-2726-SM-5N9DZ	524.900991212898	1128.70918356824	325.563113357922	337.39919065305	1619.10885019359	1826.26158585023	GTEX
GTEX-11P7K-2326-SM-5EGKZ	665.2476217327	1084.59185331625	411.754477887881	330.100216401271	1594.40849389715	1551.27361251304	GTEX
GTEX-11P81-2726-SM-59876	719.297537559041	1083.36010850553	475.04180654209	426.860083771331	1642.41214787214	1112.81877091118	GTEX
GTEX-11TT1-2726-SM-5LU8L	720.599030585268	837.265470149042	534.776278577347	427.521335503871	1631.41080086679	1314.04331933448	GTEX
GTEX-11TUW-2926-SM-5BC59	577.655045530289	1205.49688360475	348.220521191443	334.728895073811	1634.35770587785	1666.26385981422	GTEX
GTEX-11UD2-0526-SM-5GU69	780.987916042349	996.134213898632	376.965246236403	360.266536296107	1681.44754134126	1308.54895328206	GTEX
GTEX-11VI4-2026-SM-5CVLJ	726.672420356291	970.298541504502	422.21267263187	392.867840608287	1633.13620123687	1322.51513810719	GTEX
GTEX-11WQC-2726-SM-5CVLG	842.513452981957	916.125097876354	438.451526868794	400.735366164678	1730.60986916214	1003.60070380346	GTEX
GTEX-11XUK-2426-SM-5GU72	801.592438734034	851.084374431007	505.957703514936	408.145626150523	1650.65733744545	1195.68120834892	GTEX
GTEX-11ZTS-0326-SM-5EQKP	702.388112521944	1084.11581471514	396.742869571734	376.886651134678	1687.63772367048	1315.06095340192	GTEX
GTEX-11ZUS-1326-SM-5FQUC	837.994933550535	870.903578976526	493.203999290365	426.146848241262	1655.81270334083	1107.74519361749	GTEX
GTEX-11ZVC-2926-SM-5986H	778.910432458422	992.262743685679	420.293997028833	414.954895866078	1655.09633131293	1214.9036836048	GTEX
GTEX-1211K-2426-SM-59HL8	806.253978682385	760.225339147641	639.845599412048	431.531371445842	1662.25136749417	1058.81835860003	GTEX
GTEX-12126-0726-SM-5FQTX	865.938301796431	753.729415419978	512.01950311897	406.093262587449	1668.14618456382	1105.42217732025	GTEX
GTEX-1212Z-2826-SM-59HJ5	842.934260321685	767.548407189833	470.568406117523	417.531178861724	1707.06821625411	1175.96459543373	GTEX
GTEX-12584-0426-SM-5FQTT	727.649304593712	989.246336438296	465.458868550103	361.560471425265	1658.53131054108	1218.84787858961	GTEX
GTEX-12696-2726-SM-5FQUL	665.965392809101	1009.69666474727	444.858280587908	314.157862620295	1659.14249838814	1472.56202871197	GTEX
GTEX-1269C-2826-SM-5EQ5O	822.767239711916	946.082021676525	464.04662668951	363.775296828192	1718.70570972684	1087.48517667057	GTEX
GTEX-12BJ1-2726-SM-5HL9M	688.882921329945	990.632884437754	463.190696271954	358.104145806836	1600.07646456826	1469.56931226643	GTEX
GTEX-12C56-2026-SM-5FQSI	737.59137553962	876.671552027192	501.871839095947	398.132404876459	1602.01107257471	1380.66915360478	GTEX
GTEX-12WSC-0526-SM-5BC5X	911.73669659974	793.19729364033	403.68057592687	424.853512245959	1722.92338411858	1078.73542605086	GTEX
GTEX-12WSH-2826-SM-5GCP5	720.128375190439	1046.63840626545	392.126301316911	409.053412464319	1626.09225522017	1340.29838301687	GTEX
GTEX-12WSK-2726-SM-5CVND	783.148461158085	1046.76245294741	389.094885472686	414.000957833989	1594.90887134726	1218.45871576295	GTEX
GTEX-12WSL-2626-SM-5GCNV	686.934164359801	929.185464973695	430.471570396497	362.538399475838	1636.28728382267	1544.97646056164	GTEX
GTEX-12WSM-0526-SM-5GCO8	798.241590178475	761.755809720277	549.072149996535	403.20159573546	1686.22566794611	1204.85430665174	GTEX
GTEX-12WSN-2726-SM-5LZUK	898.662995527474	623.186832143159	457.959060290597	425.772936415135	1690.47778053701	1284.54357699621	GTEX
GTEX-12ZZW-0426-SM-5GCO9	701.844154125409	839.666450487125	459.319703824529	402.657585842907	1565.65509295535	1616.96485632991	GTEX
GTEX-12ZZX-0526-SM-5DUW6	935.509810537646	869.287583904913	447.301158844616	414.546963381055	1677.97776454168	1029.70477955949	GTEX
GTEX-12ZZY-0526-SM-5EQ5H	784.475307215874	976.350023780963	424.377113222782	375.924247362919	1733.17708119113	1185.8647887455	GTEX
GTEX-13111-2126-SM-5LZU2	740.203006435115	916.441432182778	450.370062054883	380.192110223324	1623.94111486127	1426.00112942858	GTEX
GTEX-13113-2126-SM-5EQ4U	757.783606040483	847.824728744233	434.088404944622	400.853903572902	1651.15532985775	1352.92834306421	GTEX
GTEX-1314G-1926-SM-5BC6F	908.455767981424	901.658858149647	444.766386658958	457.587795981467	1598.26337895812	1065.09089579828	GTEX
GTEX-131XE-2626-SM-5PNYY	680.727555576344	951.444893298145	344.83288929295	408.557929057324	1651.0334197548	1595.90307737053	GTEX
GTEX-131XF-2526-SM-5EQ68	639.741758824153	968.170074002201	421.835620844445	374.275809782947	1532.89069233227	1743.60496469237	GTEX
GTEX-131XG-2226-SM-5DUXS	664.299578724216	1174.64206217384	400.590456154685	403.173338299678	1576.23962711963	1445.19085076414	GTEX
GTEX-131XH-2426-SM-5PNZ6	920.275736934247	743.488433656715	367.026431649101	393.793701463308	1726.34755004612	1221.87454733694	GTEX
GTEX-131XW-0226-SM-5IJCA	629.104901174357	1034.74860190258	402.290193133677	371.88308779016	1651.99105680596	1600.84511892957	GTEX
GTEX-131YS-0426-SM-5EQ4J	758.273017817075	976.42636380217	380.400239989707	397.692322386334	1663.58547934499	1409.03414796247	GTEX
GTEX-132AR-0726-SM-5EQ6J	669.096109083839	966.259706487684	433.00054402665	449.644882100076	1603.13979467838	1493.55681047484	GTEX
GTEX-132NY-0626-SM-5L3D9	854.027353920959	770.630695104315	419.463602099427	422.173283004528	1739.47814882247	1238.86486827355	GTEX
GTEX-132Q8-0526-SM-5IJBQ	685.212277894918	913.93561309866	453.415705472608	459.930228998482	1622.36084437571	1458.55271972773	GTEX
GTEX-1339X-2626-SM-5K7YX	694.344073511557	910.331990450497	474.607291220815	413.373013380942	1601.006031339	1488.93078332524	GTEX
GTEX-133LE-2226-SM-5IFGU	655.170325192621	841.843314606844	588.588123316862	387.069909712821	1600.00452232183	1425.18765332279	GTEX
GTEX-1399R-2326-SM-5PNYT	745.137438909611	981.384338667552	408.089127904076	360.616648821844	1640.626674747	1362.90284448171	GTEX
GTEX-1399S-2626-SM-5L3DU	767.014892481243	962.813354650607	446.391555411065	361.107385669481	1629.53631390427	1338.04250764447	GTEX
GTEX-1399T-2626-SM-5L3E4	820.705561103689	975.059654826553	383.360371125498	365.39122890238	1701.56885099217	1247.97643895266	GTEX
GTEX-139T6-1826-SM-5KM2E	699.821198107168	1073.05693095919	410.567028899324	407.159861985014	1612.67301878715	1320.14715732325	GTEX
GTEX-139T8-0426-SM-5K7VC	814.351234108058	1019.39023108682	380.7747422708	453.160133714811	1639.21635107808	1111.21518223884	GTEX
GTEX-139TT-0526-SM-5J1NN	873.650821897348	791.708219992783	407.916889628856	469.673254240674	1670.44613395797	1229.09142572939	GTEX
GTEX-139YR-2726-SM-5K7VV	744.610797680919	975.10387097815	347.897473660322	360.247098845433	1680.40237261448	1416.25827954771	GTEX
GTEX-13CF3-2226-SM-5J2MX	662.527415501025	1013.81301968474	623.846158193859	397.481325560908	1684.55163721186	1114.43138651406	GTEX
GTEX-13D11-2726-SM-5K7V7	901.830057134184	961.89294490151	436.51805285122	329.687563612485	1575.26454395402	1300.68685595223	GTEX
GTEX-13FH7-2326-SM-5KM1E	566.89905213686	1057.71372475319	393.072321852595	328.939696564443	1625.34741641096	1772.88293731114	GTEX
GTEX-13FHP-0426-SM-5J1O5	764.405452684642	876.337469389804	384.230551364717	429.324599914339	1727.34100609712	1323.89934554653	GTEX
GTEX-13FTW-2226-SM-5J1OH	719.808302865764	997.312790648123	430.752858690236	409.621246158042	1653.46868298801	1274.43545528817	GTEX
GTEX-13FTX-2226-SM-5J1OP	854.593729417429	777.975138748355	484.646252880658	459.378802586954	1580.13967850302	1204.15032791255	GTEX
GTEX-13FTY-0426-SM-5IJC2	846.64398010575	919.886111579053	435.136706329299	395.979809165287	1703.66773399604	1077.08648046303	GTEX
GTEX-13G51-2926-SM-5IJDL	782.618793278818	1058.20516123397	388.952348513799	461.142213101634	1704.26690756784	1133.98808019265	GTEX
GTEX-13JUV-2426-SM-5J1NS	724.180489658903	981.699631295841	381.646373307029	370.093045778982	1672.23803121724	1431.55848214779	GTEX
GTEX-13JVG-0426-SM-5MR59	700.036433062392	1182.93459599877	340.55272240744	365.949766678105	1608.50404169327	1443.8665595186	GTEX
GTEX-13N11-2926-SM-5K7VD	754.816147409738	1054.66650610064	356.883630144983	423.108527686666	1608.71029379807	1375.67922211911	GTEX
GTEX-13N1W-0326-SM-5IJDJ	809.736643398053	931.455224620031	401.004104431399	396.225391443173	1705.64179919742	1222.93034688461	GTEX
GTEX-13NYB-2926-SM-5K7VH	836.582338630786	891.796658579394	391.749705406395	405.33703441354	1674.11104560646	1233.84003744016	GTEX
GTEX-13NYC-0826-SM-5N9FP	783.028709272177	932.554719499931	395.442990736223	416.837447714148	1606.10961092109	1331.99139025622	GTEX
GTEX-13NYS-0526-SM-5J1OF	671.010474350541	1029.66014668354	392.460639631145	381.936141685425	1574.29046980786	1543.8383712172	GTEX
GTEX-13NZ8-1626-SM-5IJBC	756.911238898365	1032.74541598999	439.709181940877	418.172632796027	1652.38902362243	1185.23557866614	GTEX
GTEX-13NZ9-0826-SM-5J1NI	715.088343172481	1263.15776549469	360.046783017742	413.956704025718	1630.93694584707	1208.50497328127	GTEX
GTEX-13NZB-2226-SM-5MR5B	883.760669840652	759.236544194594	436.273984614815	444.095915507982	1626.15057940412	1232.88098588067	GTEX
GTEX-13O21-2526-SM-5J1OZ	740.982016587087	1032.99720347434	374.752606056638	411.155190500873	1616.43236862782	1409.90168813235	GTEX
GTEX-13O3O-0426-SM-5KM2Y	900.181134592192	879.017948960527	435.747937767385	436.861885127613	1625.66611362494	1155.65981695238	GTEX
GTEX-13O3P-0526-SM-5K7UT	737.398278893049	989.231152514101	376.47098448576	406.760096431413	1630.857711777	1374.66502967757	GTEX
GTEX-13O3Q-2526-SM-5IJC4	880.090829846379	882.414430265231	418.058510437341	422.888030056019	1694.91679898598	1111.53491366601	GTEX
GTEX-13O61-2526-SM-5J1O8	766.081539485484	1016.99033352596	384.978865954751	382.198348653573	1588.35166054713	1403.6533313251	GTEX
GTEX-13OVG-2326-SM-5J1OV	690.383024323433	1077.96722432455	325.104429467789	357.642450112233	1671.19291414858	1491.30476193984	GTEX
GTEX-13OVH-0426-SM-5K7UC	692.870424535524	951.797917755127	357.173337878512	391.290809602079	1600.1061165313	1624.83000265593	GTEX
GTEX-13OVL-1326-SM-5IJCZ	828.547010661163	876.974697990108	396.156912571161	431.171744667267	1710.07960807731	1207.87623964068	GTEX
GTEX-13OW6-0326-SM-5L3H9	854.501194220034	1107.0273180503	347.104277312274	416.501610244797	1646.4963626959	1091.54999594762	GTEX
GTEX-13OW7-0626-SM-5K7UD	847.100803907031	967.883119561947	363.715565513206	449.727568712754	1671.95825601805	1108.00229465549	GTEX
GTEX-13OW8-1626-SM-5L3HW	817.451901940315	1033.6079614635	350.103199871931	382.404471791041	1662.88057153724	1340.9539923212	GTEX
GTEX-13PL6-0526-SM-5L3G6	818.690776811243	712.461013893643	482.02368721181	482.291061468055	1677.69159626494	1407.87787739471	GTEX
GTEX-13PL7-2126-SM-5L3HZ	817.710180004377	1042.03503756956	344.494971656256	413.979805951063	1614.92069489329	1309.36838777085	GTEX
GTEX-13PLJ-0526-SM-5K7VW	915.393703519061	741.82489418343	513.037896359791	466.765217428325	1664.64968200083	998.010654378663	GTEX
GTEX-13PVQ-0526-SM-5LU8Q	657.138927411315	898.746481183106	426.172514034142	375.452846092398	1656.93732170658	1650.41979316688	GTEX
GTEX-13PVR-2726-SM-5SI6H	722.570595291112	1006.66748239819	393.962928628399	370.336866534567	1640.08250986617	1430.90383753286	GTEX
GTEX-13QBU-2226-SM-5K7WI	785.115745955348	1024.72536039883	387.496517285194	416.375191464365	1610.31025910385	1239.54354818345	GTEX
GTEX-13QIC-1626-SM-5K7TZ	632.589618344394	1091.14515439562	367.005715904801	290.825033860706	1664.32863909489	1595.49698028458	GTEX
GTEX-13QJ3-0626-SM-5SI6G	915.689187397476	839.428643984491	404.218901760443	486.378161585301	1660.68880353128	1108.80962277403	GTEX
GTEX-13RTK-1826-SM-5S2P3	847.327503531426	843.446298658582	383.306586261035	459.824009109472	1573.70754233444	1277.62997880137	GTEX
GTEX-13S86-2526-SM-5S2V5	817.276850819223	818.862472195219	370.906637277696	479.666127321548	1610.34440210318	1403.0388108239	GTEX
GTEX-13U4I-0426-SM-5LU4W	643.541985338476	777.95227264864	433.637136979956	434.826499239857	1741.08031903737	1621.23052238248	GTEX
GTEX-13VXT-0526-SM-5SI9O	747.526803000333	1002.23729214547	418.404353563844	394.289315820641	1605.19320045013	1347.6273778704	GTEX
GTEX-13VXU-0526-SM-5K7V1	768.272779714568	1030.28905235406	375.148098893152	321.085626175803	1714.90731473854	1264.2608352967	GTEX
GTEX-13W46-0626-SM-5LU3N	822.038932275393	808.26193717224	530.952056881523	423.831643323588	1662.80631255525	1129.74237789783	GTEX
GTEX-13X6H-2526-SM-5QGOT	711.072412113956	812.938892088552	456.417693006722	346.539554514864	1585.15629567211	1584.95372501792	GTEX
GTEX-13X6K-0526-SM-5LU51	796.536799615579	757.934316568014	495.481103912392	448.274485913355	1694.75287775044	1197.65361120291	GTEX
GTEX-144GL-0526-SM-5LU41	773.996570079131	911.797960307966	449.700141030653	394.823120598795	1681.81348124359	1240.49117382945	GTEX
GTEX-144GM-2226-SM-5O9B5	673.686017016116	991.500595981012	424.382763584577	349.614682651339	1616.39843476139	1498.39427761871	GTEX
GTEX-145LS-0426-SM-5LU8M	795.23824025893	907.302705527147	466.791827130983	445.353988249754	1654.57274176333	1159.85505073818	GTEX
GTEX-145ME-2226-SM-5S2VY	748.478320329257	1106.17753024606	494.472112167224	388.942104073073	1605.06952409291	1171.02541182577	GTEX
GTEX-145MF-0426-SM-5LU9T	835.417587058055	972.18749593497	380.709831320494	401.3468986295	1687.60686601878	1106.62411852151	GTEX
GTEX-145MH-1526-SM-5LUAU	738.224277348782	1092.3365801106	381.737655588217	373.310524032567	1685.52911194562	1236.66621512408	GTEX
GTEX-145MN-2326-SM-5SIB7	618.112510218499	1063.4117130411	635.304592888794	335.499193757028	1576.38220044835	1347.76204466444	GTEX
GTEX-145MO-0626-SM-5NQAW	753.425606331185	914.318625384802	367.726706826971	397.323884769964	1641.04137328205	1450.97358140936	GTEX
GTEX-146FH-0426-SM-5QGPS	775.111840137139	828.158896017179	399.495676929432	384.455633177865	1646.51590704522	1464.54278726819	GTEX
GTEX-146FR-1626-SM-5Q5DS	707.365204321774	1172.19583703708	340.139093509604	420.962348220153	1596.30894197897	1372.13593544914	GTEX
GTEX-14753-0226-SM-5Q5CH	714.989840556741	1012.38934135522	399.677730246581	341.163965557053	1617.4180673857	1429.71252118593	GTEX
GTEX-147F3-0426-SM-5SI8V	676.664936944041	1085.43086314051	406.274744208485	394.797353878724	1644.81488777288	1389.17723033099	GTEX
GTEX-147F4-0126-SM-5QGPV	717.240886488859	974.392990770842	381.755296134135	389.354367961943	1689.2175508783	1362.12630780278	GTEX
GTEX-147JS-0726-SM-5S2UL	825.388504120874	1010.77441884642	303.708761323581	414.7110652954	1655.56481795284	1298.45180502347	GTEX
GTEX-148VJ-0426-SM-5S2V8	686.694954865195	1106.13135601651	260.697618775683	327.91404059473	1540.42919241405	1706.89067566022	GTEX
GTEX-14A6H-2726-SM-5QGPL	718.922080925819	966.584980548065	356.524458470457	392.927776951406	1651.65407474318	1419.88808212872	GTEX
GTEX-14AS3-2326-SM-5S2NZ	730.10159473928	1030.71610555824	417.19375129415	403.915203401243	1604.56968547823	1322.8367200932	GTEX
GTEX-14B4R-2026-SM-5QGQL	882.412899620094	695.634291153538	489.080012957605	396.961173052288	1601.2742025926	1225.99802015939	GTEX
GTEX-14BIN-0926-SM-5S2OZ	964.943185717599	813.939094157494	403.004074037686	390.655340776576	1637.03427138923	1015.0887445815	GTEX
GTEX-14BMU-2426-SM-5RQIJ	712.735312421277	1096.72284251682	458.841322213092	408.700068481479	1554.98494084308	1271.72734846083	GTEX
GTEX-14BMV-0526-SM-5S2NE	855.471795414718	940.382263643166	381.072369772855	458.731360241477	1642.16359623012	1104.89415708648	GTEX
GTEX-14C39-2626-SM-5S2QD	790.915102476983	1014.59347755175	438.368290561389	337.873672599418	1663.28719687133	1149.60692203427	GTEX
GTEX-14DAR-2126-SM-5RQID	766.978420032186	962.688785860505	389.804036680315	385.209343180333	1616.90851012498	1340.36023871749	GTEX
GTEX-14E7W-0526-SM-5S2W8	831.096173851052	985.051498564888	299.009650882624	416.561727956212	1664.34211223054	1329.18466542148	GTEX
GTEX-14ICL-1826-SM-5RQIY	763.55406629904	1044.30417420381	419.932672336695	381.917589812501	1570.71874900955	1296.0089195892	GTEX
GTEX-N7MS-0626-SM-2YUN7	771.887004113838	998.654463224792	341.246123143586	382.161936693581	1756.03364755866	1259.4157454474	GTEX
GTEX-NFK9-0526-SM-2YUNL	741.909957525961	1102.80616119262	357.125972561318	322.492845805946	1601.63156837071	1394.62829128389	GTEX
GTEX-NPJ8-1826-SM-2YUNC	760.963616978805	1109.55457386466	324.885069361012	425.000304506155	1584.3695406659	1306.70932380984	GTEX
GTEX-O5YT-1826-SM-32PK9	757.070600141502	1081.86838134377	255.028249994289	431.532985434756	1665.62113726522	1393.17355901545	GTEX
GTEX-O5YV-1626-SM-2YUNJ	661.117290134721	1127.476145196	335.861635332087	366.776471056155	1608.68148098147	1542.09686424629	GTEX
GTEX-O5YW-1826-SM-2YUN2	761.055305671041	1064.91339090454	333.793191861133	401.404318484449	1627.90833510964	1356.25677942166	GTEX
GTEX-OHPK-1826-SM-2YUMR	777.326153562806	1021.7106086875	389.435192914575	394.775395613997	1613.8380873975	1332.31862808821	GTEX
GTEX-OHPM-1826-SM-2YUNF	739.206790026793	1115.0789679428	326.368827067027	416.556752026813	1608.13652416347	1380.6351895561	GTEX
GTEX-OHPN-2826-SM-3LK67	625.347949664881	1120.70683800575	313.593665251396	381.989155834287	1609.55784338969	1695.38744981339	GTEX
GTEX-OIZH-1826-SM-2YUNP	756.152262996736	950.18949837323	394.184595984088	340.30960115952	1623.41446014996	1462.63243310108	GTEX
GTEX-OIZI-0526-SM-2XCEG	874.028903498956	945.350568732408	332.999355814641	467.641202225989	1612.92047883594	1298.33706678716	GTEX
GTEX-OOBJ-1826-SM-3NB1C	754.414611476956	957.411073269348	404.159082786419	398.497434579327	1662.49610099786	1295.71809364932	GTEX
GTEX-OXRK-0526-SM-3NB2F	837.442664851811	821.887098507652	468.291068659568	431.406166077165	1634.77531362002	1232.55401831189	GTEX
GTEX-OXRL-1826-SM-2YUMV	848.342050669805	899.006223067334	341.162639717441	409.748908811249	1689.89332397629	1184.13762218008	GTEX
GTEX-OXRO-1926-SM-2S1O3	756.714463933337	1021.93710318379	303.0526833716	368.037599266686	1552.86688913465	1461.42046077014	GTEX
GTEX-OXRP-2426-SM-2S1NR	699.910136000075	1132.74479193729	222.507191438742	314.656668177034	1579.17488204302	1613.94177523722	GTEX
GTEX-P4PP-1826-SM-2S1NT	805.666804112614	1138.33186549817	297.881355589954	384.19333806185	1562.86806800556	1209.50920792424	GTEX
GTEX-P4QS-1826-SM-2S1NI	757.059584040626	1142.26780754403	244.695853403323	324.624746598697	1518.89826637254	1505.02663029824	GTEX
GTEX-P78B-0726-SM-2S1O2	876.201055191758	741.177068054062	368.851961928547	424.01015243736	1613.72562680477	1330.73116631873	GTEX
GTEX-PLZ4-1326-SM-2S1O7	718.816420221851	1069.36310188196	289.874280446577	390.7189385534	1559.1227699268	1500.94787354134	GTEX
GTEX-PLZ6-1626-SM-3NB23	750.59704779437	973.308225714055	445.961809177739	421.143122420326	1608.4841492433	1301.69584506005	GTEX
GTEX-POMQ-2126-SM-2S1OJ	871.470505124728	756.359017934653	307.404132657926	430.821226678475	1543.63085342634	1484.91973036285	GTEX
GTEX-PSDG-0526-SM-2S1OH	841.317635246125	725.372091592065	323.302010013226	385.597860342516	1649.14718889702	1470.18262093334	GTEX
GTEX-PVOW-0726-SM-2XCF5	912.167872692367	870.57013238024	400.367518391725	448.555921155844	1697.84820966793	1049.18993407875	GTEX
GTEX-PW2O-1926-SM-2S1OB	942.092348262215	624.309061892121	328.654023867656	505.726249113245	1665.65260141797	1208.79286599232	GTEX
GTEX-PWCY-2226-SM-2S1OP	817.020605844862	782.869029023926	303.988221228229	410.729672201665	1607.23128234835	1494.00801101837	GTEX
GTEX-PWN1-1826-SM-2S1PE	746.197808509581	1101.0318246713	273.307515730455	371.905000766782	1619.01017697373	1455.27112133743	GTEX
GTEX-PWOO-2426-SM-2S1OV	765.947507518332	804.319769959892	284.635770144856	397.201209935429	1644.9020475704	1652.47839059212	GTEX
GTEX-Q2AG-0526-SM-2S1PW	784.706530946056	762.622357351868	324.036423001097	411.91234573196	1755.77229837136	1450.22993954858	GTEX
GTEX-Q2AH-2026-SM-2S1PX	765.225606512244	1012.41054612573	251.588786429409	321.821761408898	1600.4032863728	1549.07647784957	GTEX
GTEX-Q2AI-1726-SM-2S1PZ	757.321140757167	1098.93618648494	236.423315995889	357.387298207512	1616.46795333683	1457.69966387825	GTEX
GTEX-Q734-2226-SM-3GAD9	556.065753446837	1089.89197260568	352.656339231624	405.719509860833	1632.21085398162	1753.25058649074	GTEX
GTEX-QCQG-1926-SM-5SI7Q	723.14076974298	1071.24038615549	420.91267059726	405.216184821109	1647.84834517041	1322.01502705301	GTEX
GTEX-QDT8-0426-SM-32PKZ	853.842122253952	934.976970280442	232.579888162766	512.296678051899	1703.02716961612	1328.13557133256	GTEX
GTEX-QDVJ-2126-SM-5S2U2	696.086198659737	1069.02157859559	311.39866377566	398.99852377158	1640.18509460337	1547.841377641	GTEX
GTEX-QDVN-2326-SM-2S1PF	749.122088368965	1025.05372278322	281.505499504564	331.010957534275	1559.96842889727	1520.41216411451	GTEX
GTEX-QEG4-1226-SM-2S1P6	909.930022296814	872.422364269169	219.292928153541	417.705682092122	1644.44983845217	1259.11533630917	GTEX
GTEX-QEG5-0626-SM-2S1PP	701.34789958459	1140.43441369629	272.251422449659	378.586153554925	1593.56404560604	1523.0310325912	GTEX
GTEX-QEL4-0526-SM-3GIJ4	817.083449200683	927.790097422816	290.874267283691	413.915049609909	1588.0925630067	1435.09032169311	GTEX
GTEX-QLQ7-1926-SM-2S1R6	741.871300663062	1211.86526278841	290.566139894219	364.347034338153	1592.16078660862	1393.76955455236	GTEX
GTEX-QV31-1626-SM-2S1QC	813.161165046521	972.71477516923	243.03575029637	396.645228284673	1657.80728372039	1394.30302221215	GTEX
GTEX-QV44-2226-SM-447A3	804.92667403583	980.943378810101	360.081345477085	386.861942705749	1626.24627612844	1237.66827935742	GTEX
GTEX-QXCU-0226-SM-2TC5W	832.929689165055	983.736629057165	340.051733564473	369.305063575273	1623.73587075967	1336.07969550885	GTEX
GTEX-R53T-2026-SM-3GIJF	855.506160297745	878.612836874606	264.962676441721	375.737391768051	1591.55174496989	1514.3166349851	GTEX
GTEX-R55C-1826-SM-3GADI	736.623926843175	918.84436160853	358.2166093722	369.958128168293	1612.20753764077	1527.47115138395	GTEX
GTEX-R55E-0326-SM-48FD2	731.842610123086	1220.42882570669	418.37981766176	435.663631255386	1630.47487568079	1102.9161396982	GTEX
GTEX-REY6-0726-SM-2TF4M	897.444765266303	780.768272546625	328.165404395091	425.247398956605	1643.12254332643	1382.85079917608	GTEX
GTEX-RM2N-1826-SM-2TF5B	944.618920965107	771.80625336958	279.537081171158	453.268926633654	1577.0789670311	1302.43715991368	GTEX
GTEX-RN64-0526-SM-2TC5P	825.167219974293	1008.79561490064	293.054925274116	428.839882591528	1675.69395230313	1304.95698980011	GTEX
GTEX-RNOR-0426-SM-2TF4U	797.948770119241	1122.80465906652	302.51522664121	420.615208723983	1657.33389046954	1202.482696879	GTEX
GTEX-RTLS-0426-SM-2TF5K	846.728552579145	941.279772107439	365.959697864387	434.585219990661	1657.01632049432	1190.27832250448	GTEX
GTEX-RU1J-1926-SM-2TF6S	752.933301706739	1141.11543056541	317.34369790489	405.73724029901	1578.65587254996	1418.4575246137	GTEX
GTEX-RU72-1226-SM-2TF6N	878.459142351048	905.614912089899	318.458154526711	430.738407798676	1637.55327450556	1257.28281923399	GTEX
GTEX-RUSQ-1926-SM-2TF6K	888.967043843414	730.536541027345	327.642510897178	398.594709834845	1644.4796242527	1414.17020175703	GTEX
GTEX-RVPU-1526-SM-47JXQ	523.111387649232	1205.06882300172	370.593530518088	313.060162026239	1506.74139422835	1863.55083492463	GTEX
GTEX-RVPV-0226-SM-2TF6W	860.35858342885	942.025427530818	324.104825379451	422.280986654362	1651.51325052599	1255.9277676683	GTEX
GTEX-RWS6-2326-SM-2XCB4	849.634457379915	701.629932068498	431.879286246474	412.160853291686	1649.05513084834	1356.89891606718	GTEX
GTEX-RWSA-0526-SM-2XCBC	850.970184652574	875.209741978415	427.385716931976	439.458593495842	1674.55206894373	1144.20080771214	GTEX
GTEX-S32W-2426-SM-2XCAT	828.261865419519	1052.80985120774	360.588843252422	421.926722265976	1625.45245627655	1174.33423075824	GTEX
GTEX-S33H-2426-SM-2XCB2	764.371478512595	944.118379782965	330.049867850936	445.21725589941	1674.69578777714	1365.6951668656	GTEX
GTEX-S341-2026-SM-2XCAA	670.66488645215	1095.86648435937	301.111977343012	309.354033854391	1595.66529859758	1621.09474792575	GTEX
GTEX-S3XE-1826-SM-3K2B4	723.557126817485	964.529507695468	451.938620518796	367.480627986504	1606.83971837122	1340.88037634312	GTEX
GTEX-S4P3-1826-SM-3K2AL	611.109821244234	1212.63424246607	363.863049829462	372.536425024426	1573.52521723403	1556.74399202701	GTEX
GTEX-S4Q7-1326-SM-4AD74	612.19530327015	1098.29146460702	506.616427007686	369.086763176113	1613.92384216662	1406.27429618159	GTEX
GTEX-S4UY-0426-SM-3K2AF	714.160702584065	1012.64521822694	393.188697252854	384.396920583662	1580.70988503178	1379.6980064325	GTEX
GTEX-S4Z8-2026-SM-3K2A9	732.320787069052	912.553698958951	335.924930515144	392.337973438405	1677.32609287718	1479.23522165731	GTEX
GTEX-S7PM-0426-SM-3NM91	557.694095591491	964.451691317316	652.563823853867	350.302612550086	1637.29075715423	1471.98994351885	GTEX
GTEX-S7SE-0526-SM-2XCD8	839.631994091009	910.934051190105	335.140397115988	424.785732285012	1665.47020581667	1309.27677616719	GTEX
GTEX-S7SF-2226-SM-3K2BG	780.886918240164	948.59954345579	457.196680480547	478.308726072182	1522.33095709805	1352.50470285382	GTEX
GTEX-S95S-1626-SM-2XCDJ	852.386442303055	952.918728322728	297.059789232868	370.074762522365	1584.02772306687	1487.64179959045	GTEX
GTEX-SIU8-0426-SM-4BRUE	748.041689217359	992.51653122684	356.505028618936	429.345312775011	1695.2239207571	1268.01040276821	GTEX
GTEX-SJXC-0426-SM-2XCFH	839.083973649303	885.822339822622	320.075641262327	488.459425633249	1691.41244645005	1269.61044314331	GTEX
GTEX-SN8G-0526-SM-32PLE	851.608241471345	1000.39085085572	305.203407673501	495.343912143032	1613.30266979904	1234.96216995928	GTEX
GTEX-SNMC-1526-SM-2XCFN	864.817339531964	870.410268423547	441.274726817095	498.426182821648	1661.74612936982	1058.54151194755	GTEX
GTEX-SNOS-1726-SM-32PLN	747.996882560343	935.202121968931	352.715527152419	401.592744616159	1658.19787898147	1514.06828869489	GTEX
GTEX-SSA3-0426-SM-32QPI	763.785515771136	966.469271833513	255.570724857228	410.16660730431	1659.91347137785	1560.63897344024	GTEX
GTEX-T2IS-1026-SM-32QP1	944.179290638985	918.978436893289	362.27149810393	402.931998259775	1605.13016880992	1163.81423286506	GTEX
GTEX-T5JC-0226-SM-32PMA	1027.47252344176	735.870249017444	396.307546403144	449.161350669392	1660.60768470982	994.511691129164	GTEX
GTEX-T6MN-0426-SM-32PMF	935.324166980285	830.947054021031	313.634449037801	405.953700571049	1630.99807815949	1299.00412646613	GTEX
GTEX-T6MO-1926-SM-32QOJ	931.336353508861	936.970630472061	393.200142207631	442.487733566339	1591.33683170813	1053.35294911101	GTEX
GTEX-T8EM-1626-SM-3DB7K	800.835890027089	953.320641285504	388.086344814265	436.924060121156	1607.96324772666	1293.35400596015	GTEX
GTEX-TKQ1-1226-SM-4GICJ	661.667593626708	1140.30898997742	465.777998922499	373.39773621627	1624.83913263425	1262.27757333663	GTEX
GTEX-TKQ2-1026-SM-33HB7	764.962137200993	961.834093494307	310.694714365622	455.047376620768	1643.86658161538	1441.1246536703	GTEX
GTEX-TMMY-0626-SM-33HBD	732.833466141176	1153.02345218286	443.441526598819	409.477916288135	1587.73188161126	1228.830039329	GTEX
GTEX-TSE9-0426-SM-3DB81	740.181953616435	1233.32619203683	359.190117766845	444.759472138708	1544.52850375161	1267.29233313198	GTEX
GTEX-U3ZH-1726-SM-3DB79	803.46907473535	1128.13247234877	281.166095938811	455.792564658507	1637.7516568097	1206.62268003956	GTEX
GTEX-U3ZN-2526-SM-3DB7V	646.665376902256	1213.92231899165	335.897572618375	456.973112521208	1619.64083005864	1441.50655140946	GTEX
GTEX-U412-0226-SM-3NMC8	575.491550692464	916.138897006091	544.045388799791	289.55905094378	1564.93720339839	1815.42320503429	GTEX
GTEX-U4B1-1926-SM-3DB9E	656.456761441332	921.336385896229	504.021725817864	362.240063936818	1660.68687332489	1414.994505958	GTEX
GTEX-U8T8-0326-SM-3DB93	775.915513302042	979.522979736188	355.524342874543	403.462308582338	1642.19049571161	1338.18195236476	GTEX
GTEX-U8XE-0626-SM-3DB8U	751.578189608239	859.233854277216	370.010895875082	429.325846846861	1644.88994284409	1465.6246581305	GTEX
GTEX-UJHI-1926-SM-3DB8Z	781.837382983802	829.751312331985	383.683944383446	437.815602255555	1632.09882497967	1429.81577823055	GTEX
GTEX-UPJH-0726-SM-4IHJW	696.427504979288	1021.89196652267	429.648453397564	416.304423694966	1615.09740838888	1412.97247090469	GTEX
GTEX-V1D1-2626-SM-4JBJH	771.225970184204	920.199646155763	401.915202866437	423.645739986773	1637.76545612409	1267.09598122466	GTEX
GTEX-V955-2626-SM-3NM9F	821.044417531923	958.203154040486	469.250503048649	410.505207790562	1551.48643455344	1182.49900449882	GTEX
GTEX-VJWN-0626-SM-3NMAN	546.876901461418	1121.14316268934	450.997196522805	361.806093351409	1546.96620068333	1724.79215676116	GTEX
GTEX-VUSG-2826-SM-4KKZM	642.844954511317	1077.10383858193	381.504252462386	339.473581925682	1658.70678264118	1532.3203110335	GTEX
GTEX-W5WG-2226-SM-4LMI3	869.647064566317	733.655929755422	511.11527588312	394.475351868086	1658.74532239211	1131.01160501767	GTEX
GTEX-WCDI-0426-SM-4GIAL	546.809559539281	1147.68734823854	377.696567656636	346.022606111357	1590.54246705407	1702.31860745445	GTEX
GTEX-WEY5-2126-SM-3GILK	961.822218325703	799.892630957815	316.323021259344	407.904930629732	1579.78506682473	1159.11972359421	GTEX
GTEX-WFG7-2326-SM-3GIKV	752.953153604344	1001.86552780264	338.72633918905	418.524663357732	1617.65344155959	1316.98151910574	GTEX
GTEX-WFON-2526-SM-3LK7P	689.732278178979	1170.88243526778	385.252675649169	389.517995459686	1588.61605719452	1328.22696419134	GTEX
GTEX-WHPG-2326-SM-3NMBP	695.512936368954	984.493288037333	396.874019973433	414.075603471965	1650.62621541935	1476.47831161232	GTEX
GTEX-WHSE-1126-SM-3NMBU	848.506736518949	857.369294541294	412.28527156483	420.076690289629	1685.17950228682	1221.82804646421	GTEX
GTEX-WHWD-2426-SM-3LK6S	829.716193215656	848.64506942284	434.049980035733	453.471329671734	1642.80097923404	1252.79039422016	GTEX
GTEX-WL46-0526-SM-3LK7W	769.134953621936	950.174051098041	411.93395756789	411.165613299235	1681.32978138781	1274.26932088665	GTEX
GTEX-WOFM-1726-SM-3MJFA	842.101654490209	757.811403177199	440.021058727747	460.633120510531	1647.04810106302	1273.21767288212	GTEX
GTEX-WRHK-1726-SM-3MJFK	833.745189614132	979.030468170614	542.733462502834	443.535170925515	1571.51062749089	1016.74743318689	GTEX
GTEX-WRHU-0726-SM-3MJFL	739.835093877493	1201.08513271103	264.490164782661	403.165499726509	1699.80299805083	1285.96342155578	GTEX
GTEX-WWYW-0426-SM-3NB31	769.694403448252	1041.06502613075	403.496207719161	376.999991582572	1657.27001446216	1257.76999350722	GTEX
GTEX-WY7C-2826-SM-3NB3Q	775.945235766693	995.021762523566	390.477088468046	395.411808456794	1601.28422030883	1350.24097328758	GTEX
GTEX-WYBS-0426-SM-3NM9M	840.79102457287	858.474109333071	496.754160451981	413.928466503674	1667.21151693128	1112.71410713863	GTEX
GTEX-WYJK-0426-SM-3NM9G	805.397732323848	876.591017594577	521.368784660871	420.746722408802	1585.16809372088	1212.89529898622	GTEX
GTEX-WYVS-2526-SM-3NMAT	913.663237536801	564.586282325966	489.767092538443	515.182684629126	1711.13686669637	1151.18884586552	GTEX
GTEX-WZTO-1126-SM-3NM93	840.173458890927	845.400959270102	435.750247344378	459.025304905499	1686.80745964995	1143.59837200017	GTEX
GTEX-X261-0526-SM-4PQYS	541.266480577865	1385.31625876366	329.248682191776	363.487695869848	1564.77466930399	1511.06392873877	GTEX
GTEX-X4EP-0826-SM-3P5YK	727.639530425206	925.677840301668	450.250377058821	442.788734882829	1654.94651377956	1369.79216768465	GTEX
GTEX-X4XY-0526-SM-46MW1	842.895159676065	788.117054882016	451.002963914625	401.479287554487	1698.76599101002	1220.18009262734	GTEX
GTEX-X5EB-2626-SM-4E3HZ	844.250821247516	739.658196710882	481.006696257769	467.109639283773	1638.44124365971	1272.42062519492	GTEX
GTEX-X62O-1626-SM-46MW9	874.070139324825	800.252299460487	410.111447291123	414.715796031393	1653.89370280377	1227.81513090823	GTEX
GTEX-X88G-0426-SM-47JZ5	562.547338568231	1099.90112547247	302.117669725597	375.642025988104	1591.00533718718	1798.33130917883	GTEX
GTEX-XAJ8-1226-SM-47JYS	753.385822506773	1064.94768656729	419.159419151751	408.24878322529	1601.87713284822	1300.01102540955	GTEX
GTEX-XBEC-0526-SM-4QARU	703.015024786666	990.392980000965	337.81766578022	421.428379221603	1638.69858896149	1496.46711745773	GTEX
GTEX-XBED-2426-SM-4AT4O	691.728884515786	1032.69799477858	394.008276877178	401.840005243425	1638.76169358851	1450.91781981723	GTEX
GTEX-XBEW-0826-SM-4QASQ	894.757323081064	765.853589373563	526.914863440666	448.658836108872	1572.51172601434	1048.97826391247	GTEX
GTEX-XGQ4-2426-SM-4AT55	687.969627289746	1065.12962875452	399.622919229397	363.512149999626	1564.53401958891	1559.77083246518	GTEX
GTEX-XLM4-0426-SM-4AT54	757.721100254356	876.320025964937	369.852247873519	476.879380648522	1614.9281636782	1477.75838737153	GTEX
GTEX-XMK1-2526-SM-4B666	1180.44966098783	703.809009850384	351.746200654667	434.113801390893	1642.33872987568	1044.17479623606	GTEX
GTEX-XOT4-0426-SM-4B66T	1100.04120903168	857.469819279137	288.968605043133	446.529672303758	1634.56843500922	1089.81156612662	GTEX
GTEX-XOTO-0426-SM-4B66A	749.634975970546	1071.20913396277	407.09000442971	424.415583188306	1646.98341267331	1261.56948381853	GTEX
GTEX-XPT6-2226-SM-4B66R	707.016785383446	856.8088937593	484.061476636251	394.611045796498	1640.52337570122	1448.72626198377	GTEX
GTEX-XPVG-2926-SM-4B66G	718.706658069374	977.550427363114	549.427673820016	378.65633164737	1583.06545168688	1289.44635168012	GTEX
GTEX-XQ8I-0826-SM-4BOOE	764.89918107629	899.524876880955	502.578518096594	439.460258631519	1551.72227235997	1275.17697179192	GTEX
GTEX-XUJ4-2826-SM-4BOQ2	643.526709629439	1130.57054348071	412.257687665694	346.09473139152	1621.02967774785	1459.41515926205	GTEX
GTEX-XUW1-0726-SM-4BOP5	753.125437361626	852.418247361829	446.693780795339	422.15947450442	1632.8586764849	1377.27011098708	GTEX
GTEX-XUYS-0426-SM-47JX3	696.913092970821	991.067713969486	371.023379155374	335.069477772013	1658.12664096495	1509.26468730745	GTEX
GTEX-XUZC-2026-SM-4BRW9	709.982428383239	963.798834687341	518.405868724346	370.607242966369	1589.49106758625	1258.04835179266	GTEX
GTEX-XYKS-2626-SM-4BRUT	697.349018081237	1068.1214784149	410.301114997109	442.594733105169	1635.1024168189	1304.84038588307	GTEX
GTEX-Y111-0426-SM-4TT3K	783.054556943469	1180.23927424232	343.079576799356	421.636372292645	1674.75704949167	1083.93825958996	GTEX
GTEX-Y114-2726-SM-4TT9B	616.957858225275	1152.69815626007	403.75634085937	377.944977833275	1619.42777537429	1471.57359809033	GTEX
GTEX-Y3IK-2826-SM-4WWDW	670.90282546824	1084.36812137637	395.662491540349	382.967116988001	1664.2571679101	1373.69399428684	GTEX
GTEX-Y5LM-2326-SM-5S2NK	735.559250157655	1040.85780947502	402.654376510394	410.678656004723	1619.38992695876	1263.33589083825	GTEX
GTEX-Y5V6-2826-SM-4VDSF	688.598773179702	991.292730346956	523.815262631025	300.130426116834	1581.14427378471	1425.74446805571	GTEX
GTEX-Y8DK-0526-SM-4TT3R	824.183694672849	887.496233025663	446.265795988377	425.873466686441	1711.50204792478	1149.62570235463	GTEX
GTEX-YB5E-2426-SM-5IFIV	558.758491822058	1147.94420943567	373.091506822391	389.288279199183	1622.56991141751	1604.61105294601	GTEX
GTEX-YBZK-0226-SM-59HLO	508.92052065189	1120.02045447975	343.071924961549	318.761570303879	1575.69287853009	1906.189466297	GTEX
GTEX-YEC3-1126-SM-5IFIH	699.873866932231	1079.53624990289	420.906569337687	430.388843570376	1632.02926228821	1364.9545678341	GTEX
GTEX-YEC4-2326-SM-5IFHV	692.399594452121	1103.0615508323	487.529358860676	371.768033667472	1580.92900241366	1328.2962924508	GTEX
GTEX-YECK-0526-SM-4W1ZD	721.657325686186	905.836724624815	488.862907871451	418.998179882611	1683.55391595375	1327.52071577611	GTEX
GTEX-YFC4-0926-SM-5S2U7	840.631780636014	1040.92906221022	316.271326018657	428.427569231456	1652.43620536493	1160.61797074517	GTEX
GTEX-YJ8A-0826-SM-5Q5A7	777.327389787908	1032.60102639189	370.040919530786	418.494559409138	1657.88889127223	1251.71774836298	GTEX
GTEX-YJ8O-2726-SM-5IFJ7	770.369348468085	1076.96457737529	396.31298628572	415.530144530461	1697.99433207692	1148.20530485464	GTEX
GTEX-Z93S-0926-SM-5HL8B	845.588365403722	882.353018718555	442.240128280561	393.990511223134	1684.99855246934	1154.36931150171	GTEX
GTEX-Z93T-0426-SM-5HL6G	469.644976828634	829.15216745463	853.864065781494	278.733699299547	1558.30778440893	1605.86229814566	GTEX
GTEX-Z9EW-1926-SM-5CVMP	753.008411496925	1004.12470308178	449.796853522571	389.850880380034	1633.07509286092	1227.22689769311	GTEX
GTEX-ZA64-2226-SM-5Q5A9	727.949735556987	987.295241313956	443.402480977606	403.54154435003	1612.49420115495	1356.23485824079	GTEX
GTEX-ZAB4-1926-SM-57WD8	958.848069178866	812.800045647776	388.742481151946	427.213081270844	1549.54511130954	1247.2610194202	GTEX
GTEX-ZAB5-2026-SM-5L3EQ	800.048241067853	877.981075752405	412.554811022255	440.935765288836	1653.21234924944	1281.45362845282	GTEX
GTEX-ZAK1-0426-SM-5J1MS	707.204548851776	880.074202708892	581.970846546837	389.35683630245	1648.93005079966	1299.25552098928	GTEX
GTEX-ZC5H-0426-SM-5HL9R	762.717035758827	912.82018352983	438.778136867505	401.729133318622	1628.01211019827	1357.05582479273	GTEX
GTEX-ZDTS-0426-SM-4WAYH	749.136361601315	1036.42964967721	366.371195089756	362.317354521014	1663.68618665336	1332.33871532682	GTEX
GTEX-ZF2S-2426-SM-5DUXV	652.011246335806	1052.95462642766	371.464920758116	374.646462219367	1591.89130419645	1714.58772234553	GTEX
GTEX-ZF3C-0526-SM-4WWBG	770.53256587787	953.603860762627	441.233885937111	422.290147994336	1624.95394146941	1291.25363747658	GTEX
GTEX-ZGAY-0926-SM-4WWBQ	750.264853933134	898.089501183672	523.761560758546	374.748471449094	1608.4251129431	1298.82663534013	GTEX
GTEX-ZLV1-1926-SM-5FQSF	733.327533204651	981.101576956488	472.955958752414	391.924692866146	1629.52943964946	1285.91272679782	GTEX
GTEX-ZLWG-2426-SM-57WG6	630.442818197167	973.908023031837	454.020926906756	375.570138530201	1686.18481695268	1468.08967886442	GTEX
GTEX-ZP4G-2126-SM-57WEA	725.604920015683	854.609880772017	549.012343342331	382.920991751532	1587.39495902908	1352.32816292846	GTEX
GTEX-ZPIC-2426-SM-5DUW1	875.361101554797	786.203259489683	479.470944919049	414.138672622188	1574.59790194003	1291.21137352054	GTEX
GTEX-ZPU1-2726-SM-4WWFT	533.053135889277	1096.37616768985	433.150451582715	308.027208684788	1586.7399684335	1767.47575497063	GTEX
GTEX-ZQUD-1326-SM-57WEF	757.247377212137	929.062000101039	523.152936433706	391.436730555705	1603.01175159921	1190.07103856617	GTEX
GTEX-ZT9W-2726-SM-57WG8	613.864050305914	1118.87151307759	499.966445325758	336.192927585704	1564.80458724224	1436.64078427751	GTEX
GTEX-ZT9X-2026-SM-57WEJ	663.954106870826	1113.16525217947	416.298469115127	371.170682739094	1635.50499977084	1421.0803207798	GTEX
GTEX-ZTPG-0426-SM-5O98K	745.589271971352	932.392048301013	483.584850066512	428.816473113002	1583.66836630847	1288.01435719007	GTEX
GTEX-ZTX8-1826-SM-5N9E5	700.727125767221	1088.17457776399	447.403992166885	398.909278619988	1630.63946950693	1261.22229563992	GTEX
GTEX-ZUA1-0626-SM-4YCCW	789.182033793591	936.290049128824	450.514762723098	464.217968731407	1661.4662221855	1171.99717639445	GTEX
GTEX-ZV6S-2026-SM-5NQ8P	762.850112290354	1004.90902303694	434.655521922658	367.454776771153	1623.57915809813	1297.22324523353	GTEX
GTEX-ZVE2-0526-SM-5GU7E	710.567251732544	1032.98429614992	442.595363197764	394.068228442955	1616.42059613717	1304.57842942247	GTEX
GTEX-ZVP2-2226-SM-5GU6Q	692.584072017211	1083.09531025308	401.24389633058	356.075869402316	1614.6556207153	1403.66949655547	GTEX
GTEX-ZVT3-0426-SM-5GIDW	722.71431271614	908.151325474682	432.355301954767	428.629771354675	1641.19483318536	1437.18815252348	GTEX
GTEX-ZVTK-0726-SM-5GZX6	758.551026661192	968.006913785989	553.585324188344	400.866116123249	1635.70501127703	1102.8238886164	GTEX
GTEX-ZVZO-0426-SM-5HL4Z	608.969204950272	1286.23462112447	265.084227218699	365.804899791768	1654.9552279709	1538.64483395178	GTEX
GTEX-ZVZP-2726-SM-5GZXZ	562.037523497724	998.789981871613	500.738285420408	291.99527843442	1496.8198101713	1862.11849802307	GTEX
GTEX-ZY6K-1926-SM-5GZXW	644.380151083909	973.598294523041	480.148890052751	341.250693995131	1673.9443185812	1430.44858359364	GTEX
GTEX-ZYFC-0726-SM-5E448	751.848829489808	982.832702044471	442.409378945405	372.971240225393	1670.64088864989	1252.19069152926	GTEX
GTEX-ZYFD-0526-SM-5E442	775.653421821578	872.526920139687	499.770491769205	375.891564962846	1650.30750822868	1297.77862738188	GTEX
GTEX-ZYT6-1526-SM-5E45F	732.208036945154	875.825504714109	621.09837172044	413.117014251229	1652.77142402878	1108.86933231308	GTEX
GTEX-ZYVF-0826-SM-5E447	498.065732330023	1001.88851195131	579.949140278926	377.532064886201	1567.33540296155	1696.80831380718	GTEX
GTEX-ZYW4-0426-SM-5GZYS	643.302119154319	1023.242768554	513.374416296599	372.782891178857	1588.18007247349	1442.83509924807	GTEX
GTEX-ZYWO-2826-SM-5GIDY	738.562896986895	841.691542075791	486.665748072152	417.496097246063	1679.67320676385	1329.44594041438	GTEX
GTEX-ZZ64-1326-SM-5E444	603.414591193753	1043.45350484445	524.972771813263	357.377714795837	1575.97073454448	1490.64052422375	GTEX
GTEX-ZZPU-2426-SM-5E44I	668.206650053334	914.175847132797	462.210990044628	424.050131107049	1574.07867772509	1590.01416722481	GTEX
GTEX-11ZU8-0011-R4a-SM-5BC6Y	2657.71299018868	167.678286262902	230.461120870002	250.030118783255	549.43138459314	421.10474521548	GTEX
GTEX-11ZVC-0011-R4a-SM-5BC6Z	2476.94253390088	416.740896168251	264.939140179437	341.539556819964	644.155115728926	323.38585903664	GTEX
GTEX-12WSA-0011-R4a-SM-57WB7	2515.87468646562	436.018838002822	136.878436972096	298.428117030348	576.116323242368	648.936064464213	GTEX
GTEX-12WSD-0011-R4b-SM-5LZUA	2825.2909978974	247.834933924285	137.191807161576	172.984521212882	512.590708722398	302.442334145833	GTEX
GTEX-12WSF-0011-R4b-SM-5HL88	2673.03536101947	314.144949367611	107.146955714267	174.731182942306	553.093176111644	690.146593359917	GTEX
GTEX-12WSH-0011-R4a-SM-5GU6K	2722.64285607799	209.584726155289	175.537313164019	207.017654482155	522.103085776259	498.903578615194	GTEX
GTEX-12ZZW-0011-R4a-SM-5DUX9	2609.13638745059	328.840519870106	183.101643766766	246.636533490642	577.816817955007	394.515644952726	GTEX
GTEX-12ZZZ-0011-R4b-SM-5DUV7	2565.14631062777	493.986967573612	127.169684645754	237.865239228625	616.422922362251	428.836386157269	GTEX
GTEX-13112-0011-R4b-SM-5DUXL	2768.37451618771	359.527247276642	115.670315813749	185.751048869928	523.832252826943	252.526642395113	GTEX
GTEX-1313W-0011-R4b-SM-5KLZV	2869.15117588807	237.347895230082	94.878018160616	115.385416795025	524.209907226739	288.777402634047	GTEX
GTEX-131XH-0011-R4b-SM-5DUWB	2938.47302354888	122.37076209121	141.645956660001	169.397107160914	518.326671534663	49.6914652722742	GTEX
GTEX-131YS-0011-R4a-SM-5DUVL	2864.58751643066	194.500059259451	103.882703046837	122.307121014885	547.473134387161	289.932184794227	GTEX
GTEX-1399T-0011-R4b-SM-5DUVX	2763.23065809754	292.505332113241	90.3014756916015	109.255732148014	532.616625398128	530.021533637457	GTEX
GTEX-139T8-0011-R4a-SM-5HL54	2517.82064090538	476.202618003759	162.400471866967	267.95720524013	531.232897591507	668.729062168457	GTEX
GTEX-13CZV-0011-R4b-SM-5J2NY	2621.74547201445	358.49205020508	190.668668702734	187.333170232282	508.225540715722	577.025404377117	GTEX
GTEX-13FLV-0011-R4a-SM-5LZYU	2698.40615048497	259.948406504032	157.225192028793	268.935454353534	562.954346265361	335.712870053995	GTEX
GTEX-13JVG-0011-R4a-SM-5MR4C	2450.16808815286	492.279477316534	297.345620201293	262.368385600291	580.858501334173	516.731249454362	GTEX
GTEX-13N1W-0011-R4a-SM-5MR52	2735.80948789601	309.853074866966	150.239029975595	156.296444610828	478.120382827933	533.087822891956	GTEX
GTEX-13N2G-0011-R4b-SM-5MR54	2642.49784537893	326.013637855535	148.108193118284	191.886189532784	528.212126106241	712.111020881107	GTEX
GTEX-13NYS-0011-R4b-SM-5MR3O	2400.87275730882	516.374399160003	190.042424558976	250.332736519154	590.569448698508	823.364599588692	GTEX
GTEX-13O3O-0011-R4b-SM-5KM3F	2842.75265269215	183.297301990548	113.529540854442	107.019606471322	527.413351434037	418.68828493387	GTEX
GTEX-13O3Q-0011-R4a-SM-5P9H2	2916.17344136311	196.864433706301	81.6867946661027	69.7769504029603	489.676493636026	304.725591415527	GTEX
GTEX-13OVH-0011-R4a-SM-5KM3W	2686.95665628258	345.352504805459	149.005915772795	179.116113497693	493.742021201878	532.588249828672	GTEX
GTEX-13OVJ-0011-R4b-SM-5P9H5	2297.08909664189	569.579339075516	264.508067939388	341.898417703136	635.515764182548	725.787433776283	GTEX
GTEX-13OVL-0011-R4b-SM-5L3HV	2660.46238603544	401.427403373884	134.417259858652	191.720451336178	573.05995388388	354.172643223208	GTEX
GTEX-13OW5-0011-R4b-SM-5L3HS	2613.03268819885	347.306363086319	176.525734265333	197.988830528441	566.587648822393	579.136722204602	GTEX
GTEX-13OW6-0011-R4a-SM-5O9DX	2684.78620940629	434.235367712846	115.567765471922	260.407660792099	561.350396523028	253.692573144374	GTEX
GTEX-13OW7-0011-R4b-SM-5O9CX	2678.88469082042	366.011493078663	140.435505569243	247.849191219374	589.897916475257	245.682972546434	GTEX
GTEX-13PVQ-0011-R4a-SM-5O9CT	2539.92995597806	467.536977225606	130.569844976909	288.835900413377	540.886825065763	680.499254831727	GTEX
GTEX-13QIC-0011-R4a-SM-5PNX8	2561.29546226274	320.800948239212	250.276204817961	179.005257164406	546.927003463414	640.668398270607	GTEX
GTEX-13RTJ-0011-R4b-SM-5PNX1	2631.46184916111	319.459135253214	159.384199021655	205.020719493305	546.315824342363	643.853997675078	GTEX
GTEX-13SLW-0011-R4b-SM-5S2W2	2345.9814507574	453.809796043624	202.085348383616	303.334332946984	583.121106909028	974.90242917451	GTEX
GTEX-13SLX-0011-R4a-SM-5O9BJ	2724.96276794426	282.291441919802	107.329881402075	234.460150676578	546.227324737199	465.19368359743	GTEX
GTEX-13VXU-0011-R4b-SM-5O9CI	2851.53454198162	220.130850041424	90.1501193680566	119.067096487971	518.005503113536	379.890208555324	GTEX
GTEX-13X6I-0011-R4b-SM-5PNU9	2650.24722665525	496.28143298635	44.0607975324296	227.752377416072	476.516211886446	676.37174192957	GTEX
GTEX-13X6J-0011-R4b-SM-5P9K4	2839.74811408014	210.260213153663	97.6754079672075	179.637297867347	506.344812490832	375.311698343357	GTEX
GTEX-13X6K-0011-R4b-SM-5P9HO	2735.49342556689	315.602271967455	87.1171199977168	189.063956008755	555.714185846933	529.900389188051	GTEX
GTEX-1445S-0011-R4a-SM-5PNWN	2410.39151432693	472.716318994701	186.885458156387	281.847910637902	536.363703905899	926.299706982637	GTEX
GTEX-144GL-0011-R4a-SM-5PNUI	2659.55736331309	514.373218443083	64.4452435163113	237.713362136327	554.679818321374	309.80967092584	GTEX
GTEX-145LS-0011-R4b-SM-5S2UT	2737.25832681746	269.754481551358	160.259259858976	103.725558941832	509.900761355894	570.98709789994	GTEX
GTEX-147GR-0011-R4a-SM-5S2V2	2615.15812222443	218.198695698715	162.35765244096	209.543831700536	546.034909892308	770.777218552459	GTEX
GTEX-14ABY-0011-R4b-SM-5S2VN	2843.04150544472	216.015135219194	83.160292168294	189.886936536186	587.056369206172	207.852323491039	GTEX
GTEX-14BIM-0011-R4b-SM-5S2RK	2740.40941940719	228.87237158057	146.011056192588	113.36801994073	496.403506214091	623.193536480826	GTEX
GTEX-N7MS-0011-R4a-SM-2HMKW	2731.51102960084	327.917689195422	51.0678546333577	264.318022265973	509.427347582839	542.567844720222	GTEX
GTEX-N7MT-0011-R4a-SM-2I3G9	2550.67260898054	412.608084949027	97.2545833504531	256.327604693121	528.898069717848	852.424328021826	GTEX
GTEX-NL3H-0011-R4a-SM-2I3GK	2755.53909827063	286.33647560442	122.989596004948	106.305187564232	512.491472791915	474.503141543802	GTEX
GTEX-NL4W-0011-R4a-SM-2I5GZ	2635.68307225713	408.053020594628	106.464146351517	221.977385050933	503.699837912916	671.807924689776	GTEX
GTEX-NPJ7-0011-R4a-SM-2I3GJ	2692.76598474024	416.708529887423	46.7715614966286	179.714957553628	532.512538426202	575.228141466775	GTEX
GTEX-NPJ8-0011-R4a-SM-2HML3	2485.72977268422	570.682770158283	120.68268419202	259.640110516265	522.373302807604	729.018800122752	GTEX
GTEX-OHPN-0011-R4A-SM-2I5FD	2288.89215692891	562.845562156672	89.9606301367341	283.929402185762	623.86737154177	1173.49394833353	GTEX
GTEX-P44H-0011-R4A-SM-2XCEW	2789.76219453777	245.255381735769	110.225461444442	196.717710659854	472.19021915003	526.913311784848	GTEX
GTEX-Q2AG-0011-R4A-SM-2HMKA	2944.19240933892	198.842637826794	89.1884283834003	84.1577007076856	502.683379705018	153.664027411798	GTEX
GTEX-QDT8-0011-R4A-SM-32PKM	2746.53508258909	381.723793790637	69.4040219671245	297.636581405342	533.714450349053	239.345641289724	GTEX
GTEX-QMR6-0011-R4A-SM-32PKU	2642.15794322744	418.259231786689	55.5827799927493	254.973826774061	523.982335863878	597.716362691386	GTEX
GTEX-QVJO-0011-R4A-SM-2S1QL	2750.33623995724	308.328236218047	67.8305068395012	161.663497357951	506.311534909523	628.995244662948	GTEX
GTEX-QVUS-0011-R4A-SM-3GAE7	2665.7663748294	343.547307629921	89.476481042176	228.666581589531	505.40850176384	651.216340791179	GTEX
GTEX-R55E-0011-R4A-SM-2TC5H	2915.00923785395	175.561754569279	42.8923883065333	108.431614890402	485.746859693154	411.178043139978	GTEX
GTEX-RNOR-0011-R4A-SM-3GAD3	2734.5802091424	305.094183750668	99.3049131659798	160.371380093493	517.106579035459	560.331381862405	GTEX
GTEX-S7SE-0011-R4A-SM-2XCDB	2905.40620795987	195.645848608917	58.2416312053121	168.937756741511	528.487583797068	190.966318004688	GTEX
GTEX-T5JC-0011-R4A-SM-32PLT	2713.47511507804	282.666312980593	124.324814535204	167.187617900112	501.216774160675	652.291996137714	GTEX
GTEX-T6MN-0011-R4A-SM-32QPG	2740.11501595568	308.700234396536	98.225180968614	223.931131430042	553.58481883057	342.457265112526	GTEX
GTEX-TSE9-0011-R4A-SM-3DB7H	2843.02901198577	211.685983373665	124.57776888642	127.156225475206	520.791194814904	367.067753331524	GTEX
GTEX-UTHO-0011-R4A-SM-3GIJP	2706.40126124658	459.407691234585	44.4125543662361	189.846094875606	501.337831623536	487.576443368105	GTEX
GTEX-WHSE-0011-R4A-SM-3P5ZN	2618.39414411118	263.987239875581	207.41773491844	207.780170030406	558.598303087506	700.265163951809	GTEX
GTEX-WVLH-0011-R4A-SM-3MJFS	2852.30010422823	232.935688080285	113.774165675729	157.468275032088	514.875151872162	317.563579976298	GTEX
GTEX-WZTO-0011-R4A-SM-3NMC7	2965.99913232217	160.866608693404	91.9230644372536	92.8100896185473	506.700809330287	155.00918597981	GTEX
GTEX-X4XX-0011-R4B-SM-46MWL	2684.03510175929	431.121985912677	103.457992317254	197.311479132242	465.741851697804	555.376231929725	GTEX
GTEX-X585-0011-R4B-SM-46MVH	2538.80515837262	477.221545846932	87.1117275222335	206.244327178995	477.228955083268	996.17166405101	GTEX
GTEX-XLM4-0011-R4B-SM-4AT5C	2823.46754411041	256.200663932604	101.005354157968	189.597698721385	482.98385263084	411.593461473936	GTEX
GTEX-YFC4-0011-R4a-SM-4RGLQ	2812.75200718722	225.092885864432	120.136925865658	137.780648744367	526.074074117675	457.418660705994	GTEX
GTEX-ZAB4-0011-R4a-SM-4SOKB	2805.87218517065	357.464436435795	63.8052578167228	178.544903642904	463.202945913126	360.126859015244	GTEX
GTEX-ZVZQ-0011-R4b-SM-57WCZ	2817.30345326861	286.855471411382	84.2525371180775	145.811939418269	529.497806048123	339.639642780382	GTEX
GTEX-11GSO-0011-R3b-SM-57WB2	2989.15529895767	128.742091072468	62.0487229232193	55.489528397591	503.537634280028	160.086486866788	GTEX
GTEX-11UD1-0011-R3a-SM-5BC6S	2681.78047622528	264.963823166795	140.110637770734	254.387645742513	608.243488704611	367.659816386115	GTEX
GTEX-11ZTS-0011-R3a-SM-5BC78	2712.68313264067	243.862551318536	125.299733993537	219.138205341316	568.761724628243	460.664164972077	GTEX
GTEX-11ZVC-0011-R3a-SM-5BC6V	2573.08401831405	450.971002965101	164.519424185586	291.230756346858	592.610500153466	408.189918255474	GTEX
GTEX-12WSC-0011-R3a-SM-5P9F1	3019.4129300801	91.4097507043828	77.4759990427225	13.1283308854128	459.884310726884	221.315762402527	GTEX
GTEX-12WSD-0011-R3b-SM-5LZWN	2841.83184776282	277.593088857808	103.087404786736	140.940996108506	501.841299811831	204.850274623126	GTEX
GTEX-12WSF-0011-R3a-SM-5DUW7	2846.00827894015	258.284834700962	68.4789948989823	77.9328979481743	500.308905449991	483.657405834273	GTEX
GTEX-12WSM-0011-R3b-SM-5LZWI	2995.16324168733	120.852849247433	114.558336219586	44.0486473120733	465.850084170141	119.391741192034	GTEX
GTEX-12ZZW-0011-R3a-SM-5DUWW	2711.25950670301	340.694217596699	129.241312374975	165.79284676686	556.085997939027	353.457773646899	GTEX
GTEX-12ZZX-0011-R3b-SM-5EGLH	2926.93020742466	205.489806876833	77.1238976607509	118.500504780539	527.631053746937	168.982039284663	GTEX
GTEX-12ZZZ-0011-R3b-SM-5DUXK	2861.33618335613	239.205580394377	110.756417068848	114.605908545331	520.517770244609	261.419539148721	GTEX
GTEX-13112-0011-R3b-SM-5HL9L	2864.58630837951	221.885474199706	123.819478483738	96.1325973000942	534.408021787114	196.328389816471	GTEX
GTEX-1313W-0011-R3a-SM-5EGLI	2993.72663498847	167.445168780427	48.5780297948812	28.8554289111672	496.90873882831	192.16447233966	GTEX
GTEX-131XH-0011-R3b-SM-5DUWM	3019.4410759882	111.568844416783	74.8721862213648	50.3957775938919	490.111562885049	99.9890201215539	GTEX
GTEX-131YS-0011-R3b-SM-5DUXB	2955.93682935499	141.51417924219	91.1769208149578	57.9130023610271	487.042691329744	258.663006988333	GTEX
GTEX-139T8-0011-R3b-SM-5HL4R	2589.07251331764	547.887176550022	108.981496928239	240.122304050838	524.531006627408	491.126611675362	GTEX
GTEX-139TT-0011-R3b-SM-5K7VL	2980.47102466776	61.5555484276634	156.935939298791	64.4541170235399	502.269859772429	114.450904160695	GTEX
GTEX-13CF2-0011-R3b-SM-5LZZ6	2916.92072439438	196.448592822747	77.9318633806109	96.0583265067879	516.922343939966	187.206738057527	GTEX
GTEX-13CIG-0011-R3b-SM-5K7XF	2644.63130408039	332.055199528261	126.875013501743	146.455899175096	582.146506837892	598.858630478753	GTEX
GTEX-13CZV-0011-R3a-SM-5KM27	2892.2004146745	201.855525965904	102.735158247518	71.7436358207767	459.683460854145	355.30923361742	GTEX
GTEX-13FHO-0011-R3b-SM-5K7YA	2702.70449663923	376.591820575504	103.930843755894	210.118873647871	518.678235650294	458.388878085175	GTEX
GTEX-13FLV-0011-R3b-SM-5LZYP	2865.14927239975	224.808610356785	87.7802705202164	157.736252799208	523.45130177778	220.378830908628	GTEX
GTEX-13IVO-0011-R3b-SM-5IJBJ	2520.43481330598	534.859304795801	144.049585178081	172.361299515983	538.612301338048	657.418685218288	GTEX
GTEX-13JVG-0011-R3b-SM-5LZXF	2654.8718088686	342.671601894349	134.70581586191	183.925204923125	554.590584868172	552.93043792349	GTEX
GTEX-13N1W-0011-R3a-SM-5MR5E	2947.68381487267	140.438670393607	130.125741697914	51.0114991127186	488.521481390551	209.895184611573	GTEX
GTEX-13N2G-0011-R3b-SM-5MR5G	2511.92459443389	434.529168781226	151.776575692175	312.692413372044	581.873602660655	690.640438424691	GTEX
GTEX-13NYS-0011-R3b-SM-5MR41	2702.20261604485	358.773102711102	116.072936903253	160.228457371941	533.037407314973	485.078519636711	GTEX
GTEX-13O3O-0011-R3b-SM-5KM3R	2905.90336829816	161.018474265146	112.536890349052	59.6555913141531	543.906641170799	236.209887887597	GTEX
GTEX-13O3Q-0011-R3a-SM-5P9H3	2977.01051915095	130.726413545601	80.7430228984804	37.7901317271728	518.702766593777	163.117583907041	GTEX
GTEX-13OVH-0011-R3a-SM-5KM49	2886.73774696664	184.801625470864	84.3168769287507	79.0416516768186	483.639967792905	418.650711421512	GTEX
GTEX-13OVL-0011-R3b-SM-5L3I8	2928.76597623276	200.337027971748	72.7189860320166	98.8740951795845	520.39624098278	186.686289762409	GTEX
GTEX-13OW5-0011-R3a-SM-5L3I5	2746.6386746642	337.524049543786	130.986011392119	99.4472079162962	524.593789570938	444.82444004401	GTEX
GTEX-13OW7-0011-R3a-SM-5O9DA	2737.10380474566	357.704932561113	114.319502377206	201.633493844903	573.750443234063	178.415060504717	GTEX
GTEX-13OW8-0011-R3a-SM-5L3I4	2827.65940219817	247.622755948585	144.419272344923	102.736678324786	543.481550594467	200.298020629859	GTEX
GTEX-13PLJ-0011-R3a-SM-5O9DT	2627.84988615063	387.028152707784	116.81598934809	220.846062325611	572.460679145447	460.538026492572	GTEX
GTEX-13PVQ-0011-R3b-SM-5O9D6	2648.91214164687	448.30016850689	78.2992996666279	225.078188407424	562.42932576628	470.491862107395	GTEX
GTEX-13QIC-0011-R3a-SM-5P9HT	2860.86462319467	226.019800734236	101.503781117338	73.3694325854192	485.712366225449	421.541908300243	GTEX
GTEX-13RTJ-0011-R3a-SM-5PNX7	2852.39940306105	274.458161553506	61.5870852976618	98.0213497809766	521.329053633898	368.574381131174	GTEX
GTEX-13RTL-0011-R3a-SM-5P9JP	2592.7938630212	467.425993362241	94.627372530669	244.692663708207	598.749066572165	433.78124549769	GTEX
GTEX-13S7M-0011-R3a-SM-5PNX2	2891.79892073397	213.430584117787	72.9590148957143	91.0220997607083	528.365834132011	295.791414480958	GTEX
GTEX-13SLW-0011-R3b-SM-5SI6Y	2759.50379493195	313.918547930767	86.5890430183896	137.032232248463	511.299980968034	491.162792872132	GTEX
GTEX-13VXU-0011-R3b-SM-5O9CU	3012.49058826807	129.356485391557	36.7586963265957	32.0867992670355	483.739164779569	217.973913895296	GTEX
GTEX-13X6I-0011-R3b-SM-5P9HM	2767.96844482445	388.080001951316	63.3598392262872	128.745155432016	513.63622179266	414.977678448164	GTEX
GTEX-13X6J-0011-R3b-SM-5P9K5	2981.53313044928	160.582450557392	55.9601477043881	65.0246090262926	516.358728953882	150.367440057866	GTEX
GTEX-13X6K-0011-R3b-SM-5PNUD	2864.83357280198	235.125809373333	55.2516724930844	176.089288257861	526.534685618191	329.627249692836	GTEX
GTEX-1445S-0011-R3a-SM-5P9HY	2436.10733905866	444.376551551667	144.853740442632	275.458867750697	572.119791629654	879.194483736492	GTEX
GTEX-144GL-0011-R3a-SM-5P9HP	2905.97487004881	231.880425726763	81.7690705705824	120.62337555914	533.945320842978	127.524946098763	GTEX
GTEX-145LS-0011-R3a-SM-5S2VJ	2848.19319436829	242.262228917536	66.256405266405	59.6148802609208	498.159532568738	484.733737329096	GTEX
GTEX-145LU-0011-R3a-SM-5P9K2	2879.928021285	194.903243173774	107.418595770893	109.305910268565	523.374164993384	213.244612121642	GTEX
GTEX-145MG-0011-R3b-SM-5SI67	2877.24521732635	195.914395791674	88.6884856833295	98.9379877201333	548.379561831945	202.911364440065	GTEX
GTEX-145MH-0011-R3b-SM-5P9JQ	3018.97238956093	170.561236249266	43.6580721154849	23.6882255410562	447.706099192324	183.686632326207	GTEX
GTEX-1477Z-0011-R3b-SM-5PNX9	2499.46940397019	422.693859056161	126.155445701864	256.43629728411	617.382920782072	692.930612757307	GTEX
GTEX-14BIM-0011-R3b-SM-5S2RL	2959.88327895358	132.013872565183	92.1906261507408	5.98971812509251	483.503799158735	274.671950785327	GTEX
GTEX-N7MS-0011-R3a-SM-33HC6	2994.44318991559	176.938544346122	31.8746361238422	78.2045281644224	483.798795952944	194.004767781389	GTEX
GTEX-NL3H-0011-R3a-SM-2I3GL	2925.85233206993	216.227626087518	14.4290324229746	43.0536902534261	597.438200081143	178.487579108362	GTEX
GTEX-NPJ8-0011-R3a-SM-2HMIW	2420.34478895957	553.446168540882	88.7397139071343	270.134290450414	574.34677451614	957.31960399806	GTEX
GTEX-P44H-0011-R3A-SM-5SI8A	2857.44621957311	243.175372887832	92.0874352406964	119.957249486102	475.37605991839	395.163924765348	GTEX
GTEX-PVOW-0011-R3A-SM-32PKX	3021.84076679609	203.228974153916	9.9619382094823	92.1956905681219	486.699704554412	70.7821553178608	GTEX
GTEX-PWO3-0011-R3A-SM-2I5EX	2593.92165212079	391.119883765691	15.7513813356058	194.802522728769	601.195452241449	883.510361392371	GTEX
GTEX-Q2AG-0011-R3A-SM-2HMJ9	3024.27491755532	149.301634865166	43.0357850105646	23.5867849996441	478.460624127025	145.764762327712	GTEX
GTEX-QDT8-0011-R3A-SM-32PKR	2781.42917788891	304.817441207493	46.4681766748634	223.050887269814	625.445524847946	228.933431892931	GTEX
GTEX-QVUS-0011-R3A-SM-3GAFD	2884.72709662001	210.964570074905	38.4923559568916	136.600224002049	512.648319637232	321.336583605769	GTEX
GTEX-RNOR-0011-R3A-SM-5SI8E	3018.39573500487	123.613474608392	59.8502543355305	34.8594395083485	463.6786135038	230.107735625215	GTEX
GTEX-RVPU-0011-R3A-SM-2XCAE	2760.30801100473	301.134073306942	102.072315920236	148.646071677715	506.122254537032	420.20128015387	GTEX
GTEX-RVPV-0011-R3A-SM-2TF63	2907.62885170108	199.782037083633	38.353568443205	127.441316613001	542.0601658044	269.919034488768	GTEX
GTEX-T2IS-0011-R3A-SM-32QPB	2993.32444880496	167.885057569365	19.155163492438	34.0162036098161	469.615016025505	231.003824605138	GTEX
GTEX-UTHO-0011-R3A-SM-3GIK8	2870.60573216665	294.32586731276	28.1267129451013	147.736131426341	447.264389635873	367.153731888745	GTEX
GTEX-WHSE-0011-R3A-SM-3P5ZM	2852.84092437902	260.605375230442	55.5564565700228	80.432710618324	494.232732241096	501.140197285711	GTEX
GTEX-WL46-0011-R3A-SM-3TW8E	2995.35261182852	161.200095639399	48.9669437767982	20.2565747370492	475.846686474758	210.474772850474	GTEX
GTEX-WZTO-0011-R3B-SM-3NMC6	3005.90030800231	132.623656813197	66.8583422657702	67.4602833231635	508.766908858137	116.760287557546	GTEX
GTEX-X4XX-0011-R3B-SM-46MWK	2905.2333266698	234.983599133544	79.1722555527836	72.6981718496527	503.98111514111	248.105318626532	GTEX
GTEX-X585-0011-R3B-SM-46MVG	2848.24278836157	300.718608006338	42.4294631650992	48.4614787418478	482.449102897405	493.288762740374	GTEX
GTEX-XLM4-0011-R3B-SM-4AT6E	2895.22366431677	197.714729742715	66.3107655999666	110.77148038424	485.762284501915	443.055325590032	GTEX
GTEX-XMD1-0011-R3B-SM-4AT5R	2536.93420426922	438.197847817784	125.353384234943	236.988602334855	527.833447097026	798.718304296466	GTEX
GTEX-XOTO-0011-R3A-SM-4B64W	2957.36158352135	148.062797420817	128.781654927978	53.9524950654733	479.758650388475	203.416442995312	GTEX
GTEX-Y8DK-0011-R3A-SM-4RTW5	2999.26099176366	120.461692687208	66.4040214709959	71.5522533237413	518.845669909427	64.5587054218458	GTEX
GTEX-YFC4-0011-R3a-SM-4RGLP	3011.97666276373	100.847203878035	93.3298341815304	39.4557283148588	479.471454256425	143.794984501008	GTEX
GTEX-YJ89-0011-R3b-SM-4V6EF	2980.69386190334	126.318830341616	80.4441147817388	36.8966937391424	521.848449733573	159.434757033443	GTEX
GTEX-Z93S-0011-R3b-SM-4RGNH	2999.77949185314	110.705714356251	82.1382007843764	44.1249108368849	518.654245876689	73.1005661140025	GTEX
GTEX-ZAB4-0011-R3a-SM-4RGNQ	2947.52992427464	185.182206767159	77.7207079781314	100.448008800554	524.624848305814	107.57062160379	GTEX
GTEX-ZF28-0011-R3a-SM-4WWDA	2713.10304728408	353.444933813549	140.627721157348	133.370226074209	548.763729980963	414.119067019299	GTEX
GTEX-ZUA1-0011-R3a-SM-4YCEE	2892.17351004819	233.221809885888	124.547216113978	103.018157723337	513.999285215646	193.008904185861	GTEX
GTEX-ZVT3-0011-R3b-SM-51MTJ	2719.72962583992	352.279091909283	99.8145744979566	148.533924513147	577.323749089843	375.520562616814	GTEX
GTEX-ZVZQ-0011-R3a-SM-57WC7	2915.63013984706	188.989492847774	70.9047425888048	109.028033694074	530.523826891785	192.093598173313	GTEX
GTEX-11GSP-0011-R5a-SM-57WBE	2743.31670294682	251.214848168465	128.007666223428	179.514284519761	520.672266292927	501.229798180928	GTEX
GTEX-11H98-0011-R5b-SM-57WCF	2712.90897747281	345.571730596327	120.45503572687	161.031318536239	533.974332402831	460.987490076406	GTEX
GTEX-11NV4-0011-R5a-SM-5NQ88	2835.8819472831	243.288666663116	75.9176402400934	144.788039855312	488.765037976367	431.459702774082	GTEX
GTEX-11OF3-0011-R5a-SM-57WB4	2826.13548711993	225.754620634071	142.679003744614	92.5678268412058	500.044419405241	363.148209883899	GTEX
GTEX-11UD1-0011-R5b-SM-5P9FP	2404.93435043127	597.205191106531	157.415805316056	326.683320289795	661.735942118046	430.086911423877	GTEX
GTEX-11WQC-0011-R5a-SM-5BC74	2618.03419623306	383.866761977251	162.507614401411	235.453323153499	587.675116377279	412.578976691154	GTEX
GTEX-12WSA-0011-R5b-SM-5GU5I	2543.22325126504	260.918177619707	190.144934853176	268.944253608654	581.262270028659	746.131389800261	GTEX
GTEX-12WSB-0011-R5b-SM-5GU67	2623.20176710202	329.299571651992	132.166186795546	255.507822654317	554.913053848843	633.571594367711	GTEX
GTEX-12WSC-0011-R5b-SM-5CVNS	2897.54383535894	180.451397513846	149.166691305372	54.8253847331171	473.675280068712	271.280575946102	GTEX
GTEX-12WSD-0011-R5b-SM-5CVNG	2763.51748023345	312.398867238991	145.435381355756	163.618301414286	540.024658518802	265.23201417052	GTEX
GTEX-12WSF-0011-R5a-SM-5HL8K	2630.95801006891	348.962632786387	184.628194913215	136.162508880127	545.806172759356	656.223495198223	GTEX
GTEX-12WSH-0011-R5b-SM-5P9F3	2746.47356404312	358.894373645202	130.9594992186	184.340552609677	468.385533375752	444.609378003745	GTEX
GTEX-12WSM-0011-R5a-SM-5EQ4Y	2839.03036403864	182.566279277371	176.869180132778	94.1735451079576	510.263683953369	273.610320937382	GTEX
GTEX-12ZZW-0011-R5a-SM-5DUVN	2697.40892598871	300.772903633491	189.379455374521	166.933117903833	497.871701477008	416.47532029675	GTEX
GTEX-12ZZX-0011-R5a-SM-5HL89	2720.45923226303	363.866408365348	147.004185563186	137.83147719451	565.590650873244	320.032393949875	GTEX
GTEX-12ZZY-0011-R5a-SM-5EGL9	2833.81288784903	237.995050956412	144.217796524995	107.358663890072	500.651021557218	318.498177815878	GTEX
GTEX-12ZZZ-0011-R5a-SM-5EQ4M	2732.38062084066	326.238999473636	131.280766970507	179.460719118509	560.424763414876	363.483685638707	GTEX
GTEX-13112-0011-R5b-SM-5DUV8	2585.66969272109	457.561581829666	138.961835992165	242.163284390038	622.26611560676	327.805288397528	GTEX
GTEX-1313W-0011-R5b-SM-5L3EP	2875.93474057488	228.529992948547	99.4869885919952	76.9831533645912	490.919942086146	292.256533094977	GTEX
GTEX-131YS-0011-R5b-SM-5K7YB	2861.61093040734	242.784725318655	130.419747113361	99.5295800157585	513.882313503428	215.815490197317	GTEX
GTEX-132Q8-0011-R5a-SM-5IJDM	2566.47243969765	346.559381077211	195.824971694007	176.329675399545	552.378486207906	694.209547639445	GTEX
GTEX-1399T-0011-R5b-SM-5IJDK	2744.56034690274	292.63587175141	148.690637225352	98.9272681986401	530.457069074539	457.152492846226	GTEX
GTEX-139T8-0011-R5b-SM-5J1MO	2372.33239384216	579.708622860936	206.879714308453	320.051187384816	586.35624321362	565.806876790675	GTEX
GTEX-139TS-0011-R5b-SM-5J2MZ	2382.6974066629	470.242472610817	247.341628561443	274.169726637646	620.409888755962	677.925964010953	GTEX
GTEX-139TT-0011-R5b-SM-5K7W8	2992.44775291061	72.5691582631091	99.9866561268136	67.9820332204705	520.988500514996	126.959896209706	GTEX
GTEX-13CF2-0011-R5a-SM-5LZWS	2514.44250341297	490.160419011929	113.613462515551	284.350675880652	619.778534967714	471.415773232283	GTEX
GTEX-13CIG-0011-R5b-SM-5L3F2	2600.78025604298	349.793952760434	175.979208430878	137.372747399881	575.169114445967	553.046678283762	GTEX
GTEX-13CZV-0011-R5a-SM-5K7XA	2746.61886572565	285.437160921159	154.422269633897	116.875016917745	505.652955074192	446.168649439555	GTEX
GTEX-13FHO-0011-R5b-SM-5LZZ3	2763.43628500138	347.524648727475	120.707488790357	170.465976873068	466.732546547876	352.362417045455	GTEX
GTEX-13FHP-0011-R5b-SM-5LZY2	2500.55779173602	483.277725863908	117.122737099929	259.05044713794	553.501171794203	716.234813947652	GTEX
GTEX-13FLV-0011-R5a-SM-5LZWT	2697.17668152951	318.806412060349	122.82738997421	188.129591737942	556.240137957612	454.038318384226	GTEX
GTEX-13FLW-0011-R5a-SM-5LZX6	2825.24916964362	286.995118043766	91.4133459025506	111.413190423414	486.036567261511	336.008358190814	GTEX
GTEX-13FXS-0011-R5b-SM-5LZYE	2861.01596921247	260.77663784689	92.5079706234609	132.034398535511	484.624985844371	247.005610934318	GTEX
GTEX-13G51-0011-R5a-SM-5L3EB	2854.09038102818	190.142992578282	178.738749687781	70.3306402567223	483.188695588401	296.290353809859	GTEX
GTEX-13JUV-0011-R5a-SM-5LZY5	2609.52594381853	317.13674922125	183.829382510013	156.639836049883	564.317016325237	652.676574216749	GTEX
GTEX-13JVG-0011-R5a-SM-5MR4O	2571.85831075144	425.44940922441	139.635970713994	245.757496337309	620.983522472032	439.058671321748	GTEX
GTEX-13N1W-0011-R5b-SM-5MR5Q	2629.81122134889	333.622150092696	145.645534534369	205.562138110119	500.148383562074	745.898948282115	GTEX
GTEX-13NYB-0011-R5a-SM-5MR45	2773.36304713748	353.785979905692	123.663023543727	168.223374711482	528.956502859161	168.5711068112	GTEX
GTEX-13NYS-0011-R5a-SM-5MR4D	2658.67593126119	378.271815759029	151.962454471353	166.784800209884	535.2306775833	451.801873972282	GTEX
GTEX-13NZA-0011-R5b-SM-5KM4K	2359.8256607927	633.83705359371	169.269068030497	265.246926470015	651.646763840344	574.379851811973	GTEX
GTEX-13O3O-0011-R5b-SM-5KM44	2828.01344982954	270.499060081942	110.227797573126	165.261354353874	516.075309315756	238.113219501218	GTEX
GTEX-13O3Q-0011-R5b-SM-5P9H4	2879.54292106063	213.585178468092	119.608693856084	81.1510209599442	502.826396103748	250.811637821597	GTEX
GTEX-13OVH-0011-R5b-SM-5KM4L	2752.80395622243	295.128271931653	121.655873405023	143.353837903731	510.580462121592	462.45196125204	GTEX
GTEX-13OVJ-0011-R5a-SM-5P9H7	2318.76132602854	660.618500399463	179.663800499563	306.514298157378	599.152273154744	762.861988807281	GTEX
GTEX-13OVL-0011-R5b-SM-5L3FU	2827.03706765035	259.237242560939	122.672211790345	141.939116647992	531.126596534186	233.28642439324	GTEX
GTEX-13OW5-0011-R5b-SM-5L3FR	2678.34616260143	309.378227650392	134.063136006742	139.887502538649	536.629588553356	598.222756788014	GTEX
GTEX-13OW6-0011-R5a-SM-5O9BK	2729.82216950003	269.512058176417	171.313646141436	210.378512164327	565.191525890946	298.004590853514	GTEX
GTEX-13OW7-0011-R5b-SM-5O9DM	2792.15328564719	303.887716175551	111.201449569769	168.36401102683	545.467754959792	235.207763637971	GTEX
GTEX-13OW8-0011-R5b-SM-5L3FQ	2751.22970834274	330.479364105111	163.09084692664	146.482514556804	541.944009212639	225.533247777532	GTEX
GTEX-13PLJ-0011-R5a-SM-5O9BG	2445.38264838775	460.989437471442	174.769820768638	250.53179680532	605.652512100808	740.992756287788	GTEX
GTEX-13PVQ-0011-R5b-SM-5O9DI	2470.15619525085	552.479725223668	108.099040294023	266.105217030226	574.9423416695	714.465643170548	GTEX
GTEX-13RTJ-0011-R5a-SM-5P9HR	2786.59082083657	254.196325177927	143.693127681039	90.0713542616825	494.517168369512	495.900236720928	GTEX
GTEX-13S7M-0011-R5b-SM-5P9HS	2913.66779291308	244.209116661087	106.26359506267	106.521849601074	484.103163889951	151.531209190005	GTEX
GTEX-13SLW-0011-R5b-SM-5SI6Z	2512.4738688052	452.399942336924	140.400534999553	241.223338686736	616.867779398524	609.154009605754	GTEX
GTEX-13SLX-0011-R5a-SM-5O9BV	2859.21800493445	247.1817596313	108.189258594923	154.579874229002	507.917264415102	207.47819199015	GTEX
GTEX-13VXU-0011-R5a-SM-5O9D7	2844.33680398225	242.008742600047	114.579980730982	94.2447324076606	508.194232687319	313.406332289571	GTEX
GTEX-13X6I-0011-R5a-SM-5PNWW	2608.76637874778	449.38698725629	89.3681935546721	215.029678395907	542.793144484233	631.521767959366	GTEX
GTEX-13X6J-0011-R5b-SM-5PNWT	2892.1966854507	225.972057262757	82.8437605976913	81.1254117937125	524.283460134313	211.734093783613	GTEX
GTEX-13X6K-0011-R5b-SM-5PNUE	2765.6611410644	284.698551305312	141.94094919292	126.383705540125	493.139075467912	441.408326673069	GTEX
GTEX-1445S-0011-R5a-SM-5PNUS	2390.41547705671	504.351406641371	136.080878125776	324.486715539624	615.96241174177	789.012874706929	GTEX
GTEX-144GL-0011-R5b-SM-5PNUJ	2572.4452197267	511.468136452897	84.5438449820031	249.51267733106	624.568491722225	339.43856351632	GTEX
GTEX-144GO-0011-R5a-SM-5PNUR	2424.67823200164	404.742122894215	153.298041683581	217.67674338123	603.930356405907	967.499916363035	GTEX
GTEX-145LS-0011-R5a-SM-5SI65	2788.77347881851	260.83718484978	121.064995283068	129.626723276068	495.188883016616	498.266125583433	GTEX
GTEX-145MG-0011-R5b-SM-5S2VU	2472.46733892864	454.361812787629	80.4855894419875	228.334350343497	644.098013067172	664.626875986655	GTEX
GTEX-145MH-0011-R5a-SM-5P9JT	2884.52305346006	258.19041698807	95.5949984037181	88.013196285043	485.643259098726	232.862148950699	GTEX
GTEX-1477Z-0011-R5b-SM-5PNUO	2350.6698850864	561.570490577433	140.111637534547	230.567744513147	591.255935312201	955.275148286533	GTEX
GTEX-14ABY-0011-R5b-SM-5SI7B	2824.10645201811	275.825212018984	113.424497177904	98.1853635745107	510.886710687644	333.462543788041	GTEX
GTEX-14BIM-0011-R5b-SM-5S2RM	2819.99396711123	218.170416206469	151.340748219563	97.9340193970163	468.259127932912	388.77121111462	GTEX
GTEX-14BIN-0011-R5b-SM-5SI78	2730.92402108644	367.826676182871	98.9126231697657	183.147508590471	555.654058412342	305.443839337013	GTEX
GTEX-N7MS-0011-R5a-SM-2HMK8	2810.86424964539	316.534700592909	66.5590699276742	176.620668626546	516.647396568244	320.615525708219	GTEX
GTEX-N7MT-0011-R5a-SM-2I3G6	2628.23844497831	364.909057353019	97.2425971095432	155.996025377478	530.958159208474	782.277906853188	GTEX
GTEX-NL3H-0011-R5a-SM-2I3GB	2612.25552406744	396.160187698787	103.845407458877	181.285119136271	567.213114267444	623.550861788978	GTEX
GTEX-NL4W-0011-R5a-SM-2I3GD	2586.84662717294	407.257268935242	128.183709529693	197.033833725667	530.113839357169	716.883212703672	GTEX
GTEX-NPJ7-0011-R5a-SM-33HBK	2501.79235350066	531.716550307371	131.029236934818	319.357468164873	568.802685510821	525.191090404728	GTEX
GTEX-NPJ8-0011-R5a-SM-2HMJY	2461.41817779401	533.893283745767	145.249829563929	251.316936488902	580.397999812406	676.243378461372	GTEX
GTEX-OHPN-0011-R5A-SM-2I5FF	2468.83153614488	442.582619223322	140.509441207883	223.415073864346	570.561510045788	897.026652792689	GTEX
GTEX-OXRN-0011-R5A-SM-2I5EF	2657.86960212648	243.774607228586	152.856631685541	209.174309337438	548.263193440072	621.417827788808	GTEX
GTEX-P44H-0011-R5A-SM-2XCEX	2733.40690165883	317.171500029253	128.06761798953	171.187844777089	506.179712860103	506.374540587034	GTEX
GTEX-PVOW-0011-R5A-SM-32PL7	2834.38654438595	310.490979029201	69.8556220513175	210.282594297403	527.247891749306	179.760380377228	GTEX
GTEX-PWO3-0011-R5A-SM-2I5EZ	2512.08611191633	418.201281618843	91.7281619429957	226.024832312533	573.178220025824	901.678156276044	GTEX
GTEX-Q2AG-0011-R5A-SM-2HMJH	2825.59496453941	268.221009141581	139.341631333146	93.7874349607876	501.842939767804	304.95697742013	GTEX
GTEX-QMR6-0011-R5A-SM-32PKT	2604.97152918643	469.848095154232	77.1641323649509	269.899926413735	544.374683222069	558.529008426481	GTEX
GTEX-QVJO-0011-R5A-SM-2S1QM	2744.54091952544	351.548267994364	67.8193685549814	152.293785691087	536.818761767251	448.028204614741	GTEX
GTEX-R55E-0011-R5A-SM-2TC5N	2745.24595759425	355.138947703851	73.9556170768165	170.681625836105	506.886674809132	467.097435047358	GTEX
GTEX-RU72-0011-R5A-SM-2TF6U	2783.59319844886	297.449273317988	122.467111349221	125.08700869538	517.372213949079	302.312340550819	GTEX
GTEX-RVPU-0011-R5A-SM-2XCAD	2655.32683248812	317.573891500146	108.432685681616	152.368759096354	515.447197977998	718.567928873297	GTEX
GTEX-RVPV-0011-R5A-SM-2TF69	2648.80592086287	343.507870377775	84.3768965057823	172.361807844819	588.109932116075	559.09371445477	GTEX
GTEX-S7PM-0011-R5A-SM-3NM8G	2401.3288630514	553.219334005662	170.652784444926	292.13324989995	672.224367610676	522.91753882879	GTEX
GTEX-S7SE-0011-R5A-SM-2XCDA	2795.68600520814	209.768185406353	120.277632297267	110.167722059978	539.588878209319	413.250520570058	GTEX
GTEX-T2IS-0011-R5A-SM-32QP4	2892.18619237322	247.411734419034	94.6128374037108	82.9200109800728	474.021121963064	228.699152982993	GTEX
GTEX-T5JC-0011-R5A-SM-32PLK	2757.87101469589	269.884372908767	115.801176398036	92.0823470917323	471.684160005981	611.408305266338	GTEX
GTEX-T6MN-0011-R5A-SM-32QPD	2878.45088822124	150.964064399879	143.595272455849	111.645880151481	478.804558526128	285.282376211694	GTEX
GTEX-TSE9-0011-R5A-SM-3DB7J	2745.28122238302	249.209642636321	211.180343646781	86.4672519622819	481.984915023704	511.843294282123	GTEX
GTEX-UTHO-0011-R5A-SM-3GIJD	2811.31089283556	219.687454249554	128.476060966858	75.4707304708379	458.349755117724	448.400392408001	GTEX
GTEX-WHSE-0011-R5A-SM-3P5ZO	2679.5815833751	271.128786696307	210.084310776931	106.060373085807	502.45294646844	651.388820190358	GTEX
GTEX-WL46-0011-R5A-SM-3LK6V	2846.6292165489	310.636648569076	63.4250587720559	122.850856654337	498.478461937109	322.037106361142	GTEX
GTEX-WVLH-0011-R5A-SM-3MJFW	2832.28290077563	283.411652657467	122.443813766618	152.88139636828	530.628194234802	172.601429126276	GTEX
GTEX-WWYW-0011-R5A-SM-3NB3E	2706.03818174084	275.063726688463	135.728186745438	189.721765805557	512.96813069938	599.598511188332	GTEX
GTEX-WZTO-0011-R5B-SM-3NMC5	2850.51596429531	293.393309089273	113.869307181436	150.353158832814	536.239895106977	138.097037293639	GTEX
GTEX-X261-0011-R5A-SM-3NMB4	2446.90980955027	515.312340655111	170.401067124762	272.685363055876	639.937766512601	551.08269871458	GTEX
GTEX-X4XX-0011-R5A-SM-46MWN	2455.25737804519	523.756638949175	125.646443021254	281.526534446129	563.086118270353	760.561978566546	GTEX
GTEX-X585-0011-R5A-SM-46MVI	2579.91914390386	488.960383379414	106.779580872116	120.713346879084	462.062510684141	879.608373510712	GTEX
GTEX-XMD1-0011-R5A-SM-4AT47	2361.12822201597	443.531341506264	249.156492135405	238.381183519581	621.73062255141	858.775966895518	GTEX
GTEX-XOTO-0011-R5A-SM-4B657	2749.74466319011	313.96427552707	138.121802855396	205.22672375345	552.387910406666	263.033062778422	GTEX
GTEX-Y8DK-0011-R5B-SM-4RTW6	2773.76260029165	219.167141731939	158.704133733262	180.205111023877	543.872293314755	284.501928534999	GTEX
GTEX-YFC4-0011-R5a-SM-4RGLR	2687.10227804709	307.034266644816	147.578123862166	193.122455135473	562.71567226141	467.731304540604	GTEX
GTEX-YJ89-0011-R5a-SM-4V6GM	2685.09955988807	287.728646366914	132.753564611667	155.533316751938	614.309922941946	431.67093684533	GTEX
GTEX-Z93S-0011-R5b-SM-4RGNI	2866.24205263441	208.036163528561	93.260155225106	142.211980691802	498.982000946289	316.935000190068	GTEX
GTEX-ZAB4-0011-R5a-SM-4SOKC	2772.3831482213	329.735685904605	105.818414881313	189.899415939557	509.095161008633	326.595545964877	GTEX
GTEX-ZE7O-0011-R5a-SM-57WBO	2718.03168102419	274.782780523234	131.573481370139	171.046977326911	582.322992630662	386.924883960619	GTEX
GTEX-ZE9C-0011-R5a-SM-5EGLO	2772.733349238	257.17268459512	155.232775665449	163.201904264382	494.924692497338	397.120954959371	GTEX
GTEX-ZF28-0011-R5a-SM-4WWCZ	2611.28780508547	332.828177607077	203.964377260568	184.314610837439	495.993465711409	659.465214325078	GTEX
GTEX-ZUA1-0011-R5b-SM-51MTG	2836.25162759761	240.603612188018	150.705098363867	119.019598820279	488.039115940164	273.869272544415	GTEX
GTEX-ZV68-0011-R5a-SM-4YCDW	2591.41854785244	332.828823344254	199.471762446035	227.911984856846	580.303023324929	472.498954606739	GTEX
GTEX-ZVT3-0011-R5a-SM-51MSI	2503.17567303827	492.397519951821	136.511732510487	268.049521208413	609.608471429034	582.22014421639	GTEX
GTEX-ZVZQ-0011-R5b-SM-57WDC	2672.20947152493	364.57775283861	91.5199325892707	199.128328794875	592.831404999308	429.856432343481	GTEX
GTEX-ZXG5-0011-R5b-SM-57WBN	2741.62854170995	301.478775536543	127.688186235927	178.265332430751	541.544503066807	372.39801702809	GTEX
GTEX-11GSP-0011-R11b-SM-5NQ7V	2832.90094895872	44.4414971591089	227.184989449527	97.0998264250364	400.306009167497	409.096942324902	GTEX
GTEX-11H98-0011-R11b-SM-5NQ6U	2853.28589105872	77.3141612596034	207.994291628662	116.661766473781	394.062983107861	382.280561268449	GTEX
GTEX-11OF3-0011-R11a-SM-57WCR	2878.82233991413	35.4035870598838	233.705770608755	65.6412488557868	363.016631211907	331.672976489384	GTEX
GTEX-11WQC-0011-R11b-SM-57WD6	2870.71533833872	103.696973422513	200.87252372976	75.600392112396	402.986987508068	282.296858154373	GTEX
GTEX-11ZUS-0011-R11b-SM-5BC7B	2880.1436990898	56.6426407000638	267.757115684457	78.029169004264	350.179408850867	283.217962643932	GTEX
GTEX-12126-0011-R11a-SM-5BC6X	2907.35269338933	72.3617451348231	241.020606632689	104.71469560765	406.920531234758	128.376184079735	GTEX
GTEX-12WSB-0011-R11b-SM-57WBJ	2760.31493607521	204.181283505683	205.359882584085	79.5987010578943	376.788600889306	472.107854230552	GTEX
GTEX-12WSC-0011-R11a-SM-5GU5J	2890.4313923612	83.0082254486514	199.438702950077	75.4763176187048	390.68119017862	276.698318411421	GTEX
GTEX-12WSE-0011-R11b-SM-5P9JW	2913.5820444328	0	213.145115088224	76.3963488539586	398.92734759403	198.150118092872	GTEX
GTEX-12WSF-0011-R11a-SM-5LZVT	2831.88681161345	73.6303955914174	240.612702441683	57.2063130750656	360.187271226205	424.575248086886	GTEX
GTEX-12WSH-0011-R11a-SM-5LZVM	2842.24513156296	57.0785046549889	240.439608602953	67.3872671123736	374.826414643131	401.53350619606	GTEX
GTEX-12WSI-0011-R11b-SM-5P9EZ	2877.92007351266	66.4742526375152	242.470478142146	88.5204430099958	349.785020613086	316.704089188173	GTEX
GTEX-12WSM-0011-R11a-SM-5DUX8	2899.65439453196	90.1915513416606	215.797481770656	96.7536263774236	399.751562954795	197.386864663896	GTEX
GTEX-12ZZX-0011-R11a-SM-5DUVJ	2891.12533866704	76.0377132966557	211.340201954891	105.743865439621	417.511024419854	198.487745731202	GTEX
GTEX-12ZZZ-0011-R11a-SM-5EGLC	2879.41771168096	121.380131469119	222.737825820091	80.2261253973963	409.427850824461	227.628639963354	GTEX
GTEX-1313W-0011-R11a-SM-5DUXN	2864.64949415987	78.7055707835704	241.721821813037	25.9197271529946	356.2194346434	376.322376977974	GTEX
GTEX-131XH-0011-R11a-SM-5EGLN	2920.40456926274	55.6178703361467	204.314847592114	100.11487105268	421.464158534082	164.567320278286	GTEX
GTEX-131XW-0011-R11a-SM-5DUV9	2788.24347080636	218.911223736525	215.474944439872	56.3817489351048	399.648152139545	314.835805387652	GTEX
GTEX-131YS-0011-R11b-SM-5EGLM	2881.60809859898	84.6090018542311	192.658936921352	88.3404088832084	417.412716432342	264.458210819329	GTEX
GTEX-132Q8-0011-R11b-SM-5DUW9	2734.33512856948	118.874088091421	312.892786476718	27.6363113458387	373.035586096466	529.216888699174	GTEX
GTEX-1399T-0011-R11a-SM-5J2O1	2867.07144636129	103.714371886752	222.358329739243	79.9317766579696	379.91366996357	269.892589313058	GTEX
GTEX-139TT-0011-R11b-SM-5LZV1	2863.53809555392	45.2415803510058	237.889863648942	42.9176170293247	391.351687176539	320.903286124301	GTEX
GTEX-139UW-0011-R11a-SM-5IJGN	2731.41642350868	281.075106684941	296.672369072988	93.813222778816	430.130160970391	268.729492443459	GTEX
GTEX-13CF2-0011-R11b-SM-5LZXO	2905.21744671756	50.05741657265	190.78754970754	59.1487978304563	378.149010840223	284.306887398702	GTEX
GTEX-13CZV-0011-R11b-SM-5N9FN	2791.97563596107	194.952051298266	223.527959963048	66.9774740882697	367.379174592174	414.680052936717	GTEX
GTEX-13FHO-0011-R11b-SM-5LZYQ	2833.70151478358	148.849472974303	188.672945823345	86.2959371838103	348.369081627151	386.025560458929	GTEX
GTEX-13FHP-0011-R11b-SM-5LZXP	2874.20425662613	88.8647180444219	194.391550968209	77.1374334240018	387.396762847673	250.869152283176	GTEX
GTEX-13FLV-0011-R11a-SM-5LZZ7	2844.33187464412	66.3724643724567	253.800964779371	28.809148427454	387.334101130452	327.695145977374	GTEX
GTEX-13FTY-0011-R11a-SM-5IJEA	2801.6294803845	161.523695606951	195.16339882346	152.545175544235	408.923195212548	294.102750959569	GTEX
GTEX-13FXS-0011-R11a-SM-5L3DM	2888.95597999825	46.2172257217833	232.728640671849	64.9048575394099	429.988518318769	216.941627084735	GTEX
GTEX-13G51-0011-R11b-SM-5J2NE	2874.70501659216	47.9235059310258	260.615062547331	29.7343473173511	368.662574442034	333.97664734551	GTEX
GTEX-13JUV-0011-R11a-SM-5LZYH	2872.6559919588	119.217001134125	202.208784548576	29.5894107228675	382.38129173871	328.675067933217	GTEX
GTEX-13JVG-0011-R11a-SM-5KM53	2789.53533648506	119.541047412067	260.390201234858	87.9007877914603	417.219447551161	298.426549648671	GTEX
GTEX-13N2G-0011-R11a-SM-5MR3F	2859.36878145781	123.591243090346	182.318064164245	81.2538155196154	428.161954938132	279.51745427973	GTEX
GTEX-13NYB-0011-R11a-SM-5KM3Q	2881.62068466649	111.584270887735	204.394243069164	88.4984880954993	385.668511564195	251.155944656713	GTEX
GTEX-13NYS-0011-R11b-SM-5MR4P	2706.07047802512	190.174851862442	296.469828811173	91.9027202956621	462.243395301802	437.26002961921	GTEX
GTEX-13NZA-0011-R11b-SM-5KM4W	2818.97379179612	167.970564984399	212.995350089541	76.1149481023563	375.718338248	293.508181206248	GTEX
GTEX-13O3O-0011-R11b-SM-5KM4G	2857.32227852537	107.252045205938	219.592861711296	97.9277018277644	403.976267693865	293.364974277563	GTEX
GTEX-13O3Q-0011-R11b-SM-5KM2W	2874.33588045657	64.060049927443	214.17218506055	61.5174000567414	394.58271336106	276.590223865369	GTEX
GTEX-13OVH-0011-R11b-SM-5KM4X	2879.14838831584	56.9803754288173	233.444980797678	66.0110653379434	385.433551608085	284.895168206858	GTEX
GTEX-13OVJ-0011-R11a-SM-5P9H8	2724.08593438092	202.212562442589	219.123372175735	131.012074272781	421.602900248202	507.807706222518	GTEX
GTEX-13OVL-0011-R11b-SM-5L3G7	2867.57900321559	44.6692908230962	229.127840068627	90.1234974882287	400.180771391569	270.609876804125	GTEX
GTEX-13OW5-0011-R11b-SM-5L3GG	2842.06595162487	94.4486740623769	206.184838608866	72.9281341775151	435.598458208974	350.133209458636	GTEX
GTEX-13OW6-0011-R11a-SM-5L3H2	2886.93048376647	80.9843958380606	229.191771063514	95.9888077880362	385.61897205582	195.637547195916	GTEX
GTEX-13OW7-0011-R11a-SM-5O9DY	2884.1011876019	70.4552039871671	220.771369894538	88.5269648737235	378.530567058764	233.900759725201	GTEX
GTEX-13OW8-0011-R11a-SM-5L3GT	2825.25669283645	137.940683416132	240.357070959137	75.925688555061	389.498073278775	303.765393578725	GTEX
GTEX-13PLJ-0011-R11b-SM-5O9BS	2816.60797113426	149.328871636828	168.515110696091	93.5987659517297	461.794524837531	337.429290551936	GTEX
GTEX-13PVQ-0011-R11a-SM-5O9DU	2743.42568015622	248.12163781133	224.876649695683	133.226425904967	382.291727943337	415.778175291311	GTEX
GTEX-13QIC-0011-R11b-SM-5O9BU	2845.80908090474	155.534498842636	191.892656600659	72.9984008402099	352.479012614435	381.390095701856	GTEX
GTEX-13RTJ-0011-R11a-SM-5O9CK	2853.4282721365	99.1612573575257	194.759674626187	64.8888635438803	400.375241723283	378.547754300071	GTEX
GTEX-13S7M-0011-R11b-SM-5P9HU	2886.00027794056	88.5029627440306	203.220133756576	79.8124796884765	378.482429295785	276.219608537184	GTEX
GTEX-13SLW-0011-R11a-SM-5SI8Q	2822.86840617732	91.7846483697217	254.085280758851	86.8325060684947	368.280519996388	341.751983061215	GTEX
GTEX-13SLX-0011-R11b-SM-5O9C8	2867.01205282515	18.4358330381284	314.78399620667	89.7630465916736	364.435122035201	235.828737038529	GTEX
GTEX-13VXU-0011-R11b-SM-5O9DJ	2896.32484304838	94.583331686088	178.249037197774	71.6994282806634	366.782257934078	311.601863914761	GTEX
GTEX-13X6I-0011-R11a-SM-5P9HN	2790.59672979283	196.254899716933	194.577038047225	66.8245541085237	367.764160084493	510.603419164738	GTEX
GTEX-13X6J-0011-R11a-SM-5P9HE	2866.3641846363	87.6260606981919	234.090024786607	32.1438101197929	379.769007548195	373.834848749573	GTEX
GTEX-13X6K-0011-R11a-SM-5P9F5	2842.58542476844	96.9453251809114	237.432134190295	98.488548802635	425.165507524475	302.046947375182	GTEX
GTEX-144GL-0011-R11b-SM-5P9F6	2879.79109342094	92.1294634275507	216.927558972353	86.8632943616287	407.226113811569	218.700054446232	GTEX
GTEX-145LU-0011-R11b-SM-5P9JX	2894.77539601035	43.9605006368726	198.433853385565	81.262678172982	383.892221424275	283.892432575854	GTEX
GTEX-145MH-0011-R11a-SM-5P9HQ	2875.92028298281	123.669504538174	197.943110309751	56.8531486823045	381.911417390497	283.096964870176	GTEX
GTEX-145MI-0011-R11a-SM-5P9JZ	2719.24685576078	253.984565657304	232.555384386559	131.216449487403	345.511722116547	455.204279458699	GTEX
GTEX-14ABY-0011-R11a-SM-5SI7C	2858.37412192864	62.0889386773367	192.148691826334	67.4855586157902	400.294116739251	401.339166984207	GTEX
GTEX-14BIM-0011-R11b-SM-5S2RN	2867.45411674744	82.6484548270526	214.629863840928	58.7861874637337	386.517857790302	266.275446059377	GTEX
GTEX-14BIN-0011-R11a-SM-5SI79	2877.7121614158	114.455724668138	181.599422272444	105.932518508028	416.063758831751	230.283048770961	GTEX
GTEX-N7MS-0011-R11A-SM-2HMJS	2859.99408642578	92.5397644270675	208.672593602536	47.4710647872605	353.565425747673	378.276258373841	GTEX
GTEX-NL3H-0011-R11A-SM-2I3E6	2821.238550398	98.511449397035	208.666340276523	53.7924530531449	394.157356420641	450.311654174688	GTEX
GTEX-NL4W-0011-R11A-SM-2I3DW	2796.13580386001	144.632278857527	221.612700602722	29.2130966232816	395.712749889815	477.401503847818	GTEX
GTEX-NPJ7-0011-R11A-SM-2I3E8	2777.58279126645	190.146927065098	177.661439662393	82.5260272666687	425.887446799769	422.424698044045	GTEX
GTEX-NPJ8-0011-R11A-SM-2YUMS	2731.50834971661	153.760027856487	207.181836347838	66.9615037766747	442.318874038602	562.975589306455	GTEX
GTEX-OHPN-0011-R11A-SM-2I5FM	2710.01874011304	210.216583147941	193.420412979052	124.732599737177	436.169276010975	589.219533156007	GTEX
GTEX-P44H-0011-R11A-SM-2XCER	2776.94016160257	135.451851485119	187.679860363654	125.712220148286	407.192570568749	543.938954352439	GTEX
GTEX-Q2AG-0011-R11A-SM-2HMKZ	2874.36218875802	138.749878263754	157.416422320193	95.2584351372759	420.531989086542	286.329917504759	GTEX
GTEX-QDT8-0011-R11A-SM-32PKD	2786.6501200917	164.285069458928	155.211673677594	214.610293761146	414.208653453961	445.915782939844	GTEX
GTEX-QMR6-0011-R11A-SM-32PKK	2859.21816914265	118.186470244289	179.665711891618	137.50980307935	418.362309261065	279.702919298469	GTEX
GTEX-R55E-0011-R11A-SM-2TC6I	2819.25252909908	158.344949417729	130.591973164943	114.968485799157	455.874315308974	392.96375438412	GTEX
GTEX-RU72-0011-R11A-SM-5SI8G	2827.87820551727	89.4527461861814	205.970797166187	85.9140593942756	443.482606225864	310.093384502768	GTEX
GTEX-RVPV-0011-R11A-SM-2TF6F	2830.60299693141	79.4570098079472	152.807588965714	100.871205849629	419.506604639517	418.997823305759	GTEX
GTEX-S7SE-0011-R11A-SM-2XCDD	2833.45749341331	63.685387866438	188.962920842519	43.7552096387395	395.178409689395	524.297835089871	GTEX
GTEX-T2IS-0011-R11A-SM-32QPC	2898.35719726255	109.346117143021	163.234851310076	100.902874776738	383.59731137364	267.684083999809	GTEX
GTEX-T5JC-0011-R11A-SM-32PMB	2857.5832345359	119.315184980411	181.96719782631	59.3931940931957	354.721297530817	442.644190166794	GTEX
GTEX-T6MN-0011-R11A-SM-32QOX	2895.17440682179	99.8681748886243	146.579152886783	143.593002112579	410.806322009751	227.810313648556	GTEX
GTEX-TSE9-0011-R11A-SM-3DB7N	2803.23840029474	128.091895727336	211.6502633833	110.785498907501	502.373602373313	278.954952607349	GTEX
GTEX-UTHO-0011-R11A-SM-3GIJE	2818.06226910561	136.388661941689	138.343635131957	120.787082285306	404.259050127202	407.990690913281	GTEX
GTEX-WHSE-0011-R11A-SM-3P5YY	2815.09859236589	136.767771629277	225.321154251182	111.828401248524	398.511836080627	438.914837800256	GTEX
GTEX-WL46-0011-R11A-SM-3MJFT	2843.92791906916	137.037164682026	167.775942373776	85.4344080565465	426.282460135953	357.248751629802	GTEX
GTEX-WVLH-0011-R11A-SM-3MJFO	2876.94367322393	61.1198377372431	206.745135761317	110.542121486358	426.908361655481	228.142732319805	GTEX
GTEX-WWYW-0011-R11A-SM-3NB38	2816.91850737945	97.6115552407131	219.634723323538	65.5101233073174	437.421935397518	448.950475757968	GTEX
GTEX-WZTO-0011-R11A-SM-4E3K9	2881.56092675607	103.959375578963	198.843593018641	72.0942297741728	437.082880379689	213.768086978919	GTEX
GTEX-X261-0011-R11A-SM-4E3JY	2796.86106142649	147.374688269555	237.997090423955	65.8792520238004	449.806215490818	291.672862903059	GTEX
GTEX-X4EP-0011-R11B-SM-4QASK	2767.61043434311	86.5135186033057	239.905926412451	214.606693120311	420.639952995758	374.58626965604	GTEX
GTEX-X4XX-0011-R11A-SM-46MWQ	2810.48086777341	137.636935751428	214.505236311019	84.7819135818594	397.629392032889	408.53621988892	GTEX
GTEX-X585-0011-R11B-SM-46MUZ	2641.06220046083	275.093377254102	190.671507896686	108.813717292093	415.706497749541	776.716761707739	GTEX
GTEX-XMD1-0011-R11A-SM-4AT5J	2750.72528719764	127.317281692532	268.364831305167	68.5177637261602	409.915287079074	432.678582266609	GTEX
GTEX-XOTO-0011-R11B-SM-4B64O	2804.15648645066	116.065696493192	234.454720047191	95.0922952583353	413.604173012549	345.86841036788	GTEX
GTEX-Y8DK-0011-R11A-SM-4SOK2	2823.35621927566	128.614186575638	187.164158721672	106.66846537866	449.145666379781	256.214609088179	GTEX
GTEX-YFC4-0011-R11a-SM-4SOK6	2864.93257573096	101.116180454416	185.324562917385	97.9767883282119	446.056774257092	273.830284447243	GTEX
GTEX-YJ89-0011-R11a-SM-4SOKA	2852.23067211845	64.0949430789138	224.100957834158	57.001628855875	392.964869180628	299.343870485579	GTEX
GTEX-Z93S-0011-R11a-SM-4RGNN	2891.46631136514	57.4743959980048	225.91016080703	67.6088315650233	379.811344655425	267.394209631034	GTEX
GTEX-ZAB4-0011-R11a-SM-4SOKI	2852.20680580457	113.711080447428	208.346828564748	112.600657758235	399.445003359042	257.365949313021	GTEX
GTEX-ZDXO-0011-R11a-SM-4WWD9	2836.09864683396	40.2258848726187	292.821618097623	67.3128884367405	373.598478390526	350.678565666225	GTEX
GTEX-ZE7O-0011-R11a-SM-57WBC	2875.56886996559	44.7797824469919	214.876668314759	73.8076987725141	387.22564162556	321.317015535412	GTEX
GTEX-ZF28-0011-R11a-SM-4WWEI	2689.47860704517	278.441481065794	268.331314190603	43.3162597407401	408.707359407639	455.703476283029	GTEX
GTEX-ZUA1-0011-R11b-SM-51MTI	2853.56513481332	83.1990254604292	219.972006501034	71.5164996220558	441.003350030988	308.88194452065	GTEX
GTEX-ZVT3-0011-R11b-SM-57WBI	2834.38436919943	90.2498839304998	215.430690669114	59.7624778180165	351.474323443818	422.640543999303	GTEX
GTEX-ZVZQ-0011-R11a-SM-51MS6	2880.45202062677	74.1154594074663	214.168085461963	70.6530556664121	397.511612187186	283.880253673895	GTEX
GTEX-111FC-3326-SM-5GZYV	2790.26266294358	143.690282814193	239.663883762982	58.5428589190853	507.031559969163	268.894268739597	GTEX
GTEX-1128S-2826-SM-5N9DI	2845.02525342956	129.27800189828	193.340688150764	71.0139956230705	414.117075523529	287.860354405974	GTEX
GTEX-117XS-3126-SM-5GIDP	2871.62056036058	94.7731589508145	221.486357918532	87.1036269527418	428.575716880783	224.099594860032	GTEX
GTEX-1192X-3226-SM-5987D	2788.73071812964	173.259455176223	240.806420059161	53.1343963372	432.191038944594	325.18730647069	GTEX
GTEX-11DXW-1026-SM-5H11K	2899.22065072749	50.0517240647711	248.396117961263	68.4146223239358	418.457611077259	128.649765422356	GTEX
GTEX-11DXY-3126-SM-5N9BT	2874.94633713261	107.322884637169	190.513560232039	95.1063556800227	428.937692791668	244.983058528239	GTEX
GTEX-11DYG-2926-SM-5H132	2880.71328758956	90.8315561994647	234.856607245661	110.899278889754	421.20209406513	146.503270334816	GTEX
GTEX-11DZ1-2926-SM-5A5KI	2715.11112433082	225.88579589475	233.69907879563	54.6597088768195	525.700710542454	328.933008290647	GTEX
GTEX-11EI6-2926-SM-5985U	2688.27300805972	240.413703456856	223.652695886952	59.9640115653415	519.302793407508	441.33277898989	GTEX
GTEX-11EMC-3326-SM-5P9JH	2804.98432258665	179.521077242554	238.000129019557	94.849652005419	436.937504233214	221.4616612161	GTEX
GTEX-11GSO-3026-SM-5Q5AL	2879.23235978666	143.111018457227	195.89839223764	99.7485068594997	402.944126616669	237.859903624888	GTEX
GTEX-11GSP-3126-SM-5A5LL	2817.28443349502	114.020615883003	266.113387891558	112.68419665864	434.184376265172	209.010915197196	GTEX
GTEX-11NUK-3026-SM-5986K	2865.12199204289	90.0458561176378	241.10961663554	94.1869909325408	437.568972628288	155.250324938044	GTEX
GTEX-11NV4-2226-SM-5BC4T	2861.62654669452	89.9615274345348	214.186040741408	83.7646878575096	419.168238120289	259.347703247771	GTEX
GTEX-11O72-2826-SM-5HL6W	2855.76699987652	99.3286423496936	240.277529069946	56.0384381334151	420.399775016538	225.901471673717	GTEX
GTEX-11OF3-2926-SM-5HL78	2885.61982581653	47.4868394519771	252.030910187659	62.4234520856659	393.149754266234	210.311499175622	GTEX
GTEX-11ONC-3026-SM-5985W	2846.15225221957	90.5353378240787	249.57789434896	97.0355813117927	437.649915460115	202.7135936081	GTEX
GTEX-11PRG-2826-SM-5BC54	2827.64556394289	76.3809331349943	197.675012445645	96.9403231051157	557.051319650838	113.029857424377	GTEX
GTEX-11TTK-2826-SM-5GU5K	2732.01831766478	206.655438517469	239.891176896044	93.989830330043	503.504451547363	324.233055547749	GTEX
GTEX-11ZTS-3226-SM-5EGID	2827.33808946112	94.8639144325733	285.462220346681	80.0769626730204	421.940115300439	217.50894776178	GTEX
GTEX-11ZUS-2826-SM-5EQKW	2880.13676150714	65.4095154668156	257.069743464135	68.3264429945261	406.183530682138	223.125052260803	GTEX
GTEX-11ZVC-3026-SM-59HJM	2840.32277858023	114.498959165312	240.685516869778	114.420340778174	427.590789861007	212.545708080699	GTEX
GTEX-12126-0926-SM-5FQTW	2884.75691381685	87.7794007333657	253.716788025073	98.291863826796	423.671676716862	116.56432768247	GTEX
GTEX-1269C-3126-SM-5EGI6	2693.06305549356	232.26200048819	266.58454160203	119.959937759198	536.026005175612	220.002355514132	GTEX
GTEX-12WSB-3026-SM-59HKM	2790.3381057138	163.23573370395	244.009701365218	121.698800440959	427.55267626538	268.324165873036	GTEX
GTEX-12WSC-2926-SM-5BC5Z	2848.62002057966	106.705316798954	228.536164838277	79.2114192116758	391.381157320637	275.287463681728	GTEX
GTEX-12WSD-3026-SM-5LZU7	2875.50067841915	116.430843767914	223.654696291491	112.9118997698	418.998152561759	175.32736420196	GTEX
GTEX-12WSE-2926-SM-5RQJ9	2876.27517372869	11.0738196681589	319.564970249701	47.3999484869454	381.614565972548	178.350198801315	GTEX
GTEX-12WSH-3126-SM-5LZW8	2843.73724424337	108.034958532018	241.682140194562	79.0563167236862	382.477427496349	297.082368748138	GTEX
GTEX-12WSM-2126-SM-5GCOC	2882.13480472113	66.1011059745149	224.855229578271	72.5402683571467	414.490703348031	216.280960551737	GTEX
GTEX-12ZZX-2826-SM-5BC6K	2886.08364809908	78.6645447279726	223.018141695955	104.561083504717	424.861839054586	146.301711282449	GTEX
GTEX-12ZZY-2926-SM-5DUXO	2890.39543630144	68.0470994804971	238.376296212634	79.927344216056	394.118129200423	209.23242506615	GTEX
GTEX-12ZZZ-3126-SM-5LZU6	2817.53485036676	171.442186307479	228.723440676062	56.9404465877386	410.161567763735	306.648872169657	GTEX
GTEX-13112-2926-SM-5DUWT	2893.52379734659	91.6272401134199	241.487059062195	74.7797633843697	413.008486977616	138.940364489839	GTEX
GTEX-1313W-3026-SM-5LZUZ	2873.30316866674	92.6649422523043	234.567520518861	54.6541457519329	376.299259013219	282.784308715047	GTEX
GTEX-131XH-2926-SM-5LZU4	2892.04080111588	44.2157255058744	230.69782386266	79.1026936839215	386.421899659619	244.205307643343	GTEX
GTEX-131YS-3026-SM-5EGHY	2862.70501570727	65.1327527711579	284.443117408596	70.225508105633	386.118334894335	218.317849959586	GTEX
GTEX-132Q8-2926-SM-5IFFP	2676.3257040029	230.259523566624	264.417420845583	113.441444456901	498.414864585764	414.629152546554	GTEX
GTEX-1399T-3126-SM-5IJFS	2844.95954963604	109.941847872933	258.183233748231	68.3462598102894	400.108932833079	258.562026775995	GTEX
GTEX-139TS-3126-SM-5LZWX	2859.55475136964	146.686165142249	176.622000216638	106.488719128777	405.841081573335	266.282180723511	GTEX
GTEX-139TT-2626-SM-5LZUB	2801.78132101787	132.697316917171	184.950305390266	73.2082293958027	542.867482645032	281.671690789561	GTEX
GTEX-13CF2-3026-SM-5IFFX	2868.2912673543	61.1337508060919	274.814503622246	80.2302638986173	384.065111445593	202.455004889664	GTEX
GTEX-13FHO-2926-SM-5L3ES	2822.53647104307	137.453179204972	229.864775766531	104.54361015212	427.85568845826	262.055511936812	GTEX
GTEX-13FHP-2926-SM-5IJG9	2836.02125249891	118.497130507616	244.255528404259	81.3843210739363	449.426009080557	187.187169652412	GTEX
GTEX-13FXS-3026-SM-5LZYO	2908.97016764913	97.013464698667	177.42827549721	94.3955880128005	402.093300655318	222.069974562675	GTEX
GTEX-13G51-3126-SM-5IJG7	2877.19458439256	70.5920419244396	250.435888547693	66.854562622364	412.743124982757	205.813810346045	GTEX
GTEX-13JUV-3026-SM-5K7WX	2810.50531214915	167.384029626604	190.011656583412	96.0253998946083	453.162608593001	372.892025792877	GTEX
GTEX-13JVG-3226-SM-5IJGJ	2753.5179399511	170.819273134512	247.358431900479	108.665601931864	498.738644761073	254.922538084572	GTEX
GTEX-13N2G-3126-SM-5IJGL	2871.93273975898	110.679069120949	234.385830489205	96.3515874077178	411.158759616814	200.173646471907	GTEX
GTEX-13NYB-3226-SM-5J2ND	2832.3480062151	115.300156552951	220.432158399406	53.8149602052152	440.51030036804	270.584927892154	GTEX
GTEX-13O3O-3026-SM-5KM42	2833.05786998307	120.721332875519	227.360887763391	95.605240775096	440.331510645815	251.385574044364	GTEX
GTEX-13O3Q-3026-SM-5IJGD	2870.78606529004	62.6100408591152	222.374515864807	75.0195480243198	405.781673296439	265.944231277623	GTEX
GTEX-13OVH-2926-SM-5IJFH	2863.00459375353	60.0667234959097	261.080301227644	78.8133825426454	415.057160793291	233.259177202275	GTEX
GTEX-13OVJ-2726-SM-5IJG6	2661.26890516085	227.97674875797	345.3558445642	139.132888098634	440.335443807025	426.982776836256	GTEX
GTEX-13OVL-3026-SM-5IJF1	2880.58428459787	93.5274040810964	235.449475179397	102.810104854243	420.923467110627	160.936366013507	GTEX
GTEX-13OW5-3126-SM-5MR3Y	2839.27515531617	165.968762554926	205.197714783811	53.4142368520702	446.671461246371	274.406307467618	GTEX
GTEX-13OW6-2926-SM-5KM29	2852.52505769605	90.968982351464	298.683541798689	115.319324158661	404.877402291769	117.106794121069	GTEX
GTEX-13OW7-2926-SM-5MR3Z	2860.54501439193	77.4979221585659	225.072345510158	92.0242429615454	425.313910503438	235.299009890403	GTEX
GTEX-13OW8-2926-SM-5L3FV	2846.57417770807	131.382763668833	251.024286957394	90.7724029750799	394.501832616276	205.236814115338	GTEX
GTEX-13PVQ-2926-SM-5L3HJ	2724.44991388347	250.045704129773	237.125704787058	129.147969638562	397.947226575577	397.303772361924	GTEX
GTEX-13QIC-3026-SM-5LU58	2814.74769741359	94.0244067736945	278.637046826378	75.8335611936103	433.876508433222	234.791903168748	GTEX
GTEX-13RTJ-3126-SM-5S2Q4	2857.01823796213	98.6159971929901	237.187537777409	75.4379315498991	373.002388326433	310.187645512813	GTEX
GTEX-13S7M-3026-SM-5S2QQ	2853.52092849274	63.076108798469	248.58328263814	73.4154919627874	395.59671029266	263.491849838528	GTEX
GTEX-13VXU-3026-SM-5LU3K	2852.31318373484	97.8666959450979	265.252317313155	61.3293375449447	436.556047672057	173.762043962258	GTEX
GTEX-13X6I-2926-SM-5Q5C3	2800.10476591462	169.613595341417	196.470835129009	93.2977168874155	454.180581027222	330.091287674033	GTEX
GTEX-13X6K-2826-SM-5O9DS	2855.35959502009	110.927369831265	214.149312089137	119.404023592392	429.443867182011	249.240588040729	GTEX
GTEX-144GL-2926-SM-5O99F	2863.36546654522	98.4050231029109	218.463837442946	101.565674979513	411.077638414802	301.310300603719	GTEX
GTEX-145LS-3026-SM-5O99S	2830.31011178628	94.2828020782454	282.594980842328	74.0061386952075	393.942607840832	313.471418905247	GTEX
GTEX-145LU-2626-SM-5LU9Z	2860.68289480058	92.2510621662679	228.683394719066	71.6281245804507	402.328393719375	237.542922162227	GTEX
GTEX-145MG-3126-SM-5Q5D3	2832.9214899222	128.356031610951	249.134759775434	68.5310478774885	458.362881186177	175.201333994686	GTEX
GTEX-145MH-2926-SM-5Q5D2	2885.4093428735	108.354122567616	197.077855991537	90.6327824888075	417.545556459491	182.694447678574	GTEX
GTEX-147F4-3026-SM-5Q5BJ	2820.77819840404	187.714252084115	205.979996034373	76.6123501616668	421.852972628717	237.490138121542	GTEX
GTEX-14A5I-2826-SM-5SIBF	2805.50041663574	151.775420689942	233.430990209431	87.649067423251	473.157846772179	259.572396345301	GTEX
GTEX-14ASI-2926-SM-5Q5DG	2866.53242623265	85.7031718810618	190.04558037888	97.6377977329684	475.479782472947	167.629260640867	GTEX
GTEX-14BIM-3126-SM-5Q5C7	2793.71094598092	140.925551185584	218.673184207598	43.6958355753195	479.108029689665	340.908165032065	GTEX
GTEX-14BIN-3326-SM-5Q5E6	2843.72235204551	65.2918940448814	277.556470886984	87.9354578516933	431.954680365957	175.817283485182	GTEX
GTEX-14C5O-2926-SM-5RQI1	2802.36476235625	139.509332736858	236.792237068988	106.185297790379	452.639073002821	298.376514916547	GTEX
GTEX-14DAQ-3026-SM-5S2QZ	2883.93719187587	102.189083743017	201.837828047464	90.8767062716356	416.266071722476	197.027075496937	GTEX
GTEX-14E7W-2926-SM-5S2R8	2875.42180742161	112.232564026239	205.125032089839	93.1109424494483	389.60893627893	249.182290794398	GTEX
GTEX-N7MS-2526-SM-2D7W3	2879.63650925957	111.670715879667	174.214168402002	102.787968252868	350.677379312061	325.748192334263	GTEX
GTEX-N7MT-1226-SM-2D7W4	2818.15710391812	172.486282169408	159.146075255397	129.799461539779	414.01698500732	322.843194132015	GTEX
GTEX-NPJ7-2826-SM-2I3FU	2776.64859594255	210.379487492888	160.324539967416	134.464231105759	529.318845933507	221.438153953448	GTEX
GTEX-NPJ8-2626-SM-2D7W2	2766.18352762642	173.102170489569	194.118417440037	116.112938913521	399.000292770742	452.525579630833	GTEX
GTEX-P44H-2426-SM-2XCEJ	2772.81074873824	135.254866224889	170.050121100922	162.321729279669	423.608308882935	529.624139817852	GTEX
GTEX-PVOW-2626-SM-32PL8	2886.27958663099	117.602526803729	139.371221441134	143.423944125585	442.801323599139	199.444674875533	GTEX
GTEX-PWO3-1026-SM-2I5F2	2754.96847025501	164.810171026627	188.333491668243	102.898671268882	426.750795455509	538.66670859202	GTEX
GTEX-Q2AG-2826-SM-2HMJQ	2888.12148630318	87.7794839366813	191.325877302808	93.2573691122319	372.466301608189	289.230644414265	GTEX
GTEX-QDT8-3026-SM-32PKB	2846.9414926259	127.149481731503	162.547038654636	186.006256026949	411.041448253168	245.164289904985	GTEX
GTEX-QMR6-1326-SM-32PLB	2834.27402565741	128.315377967289	185.815957231184	163.285057684284	442.365867188098	234.318075085647	GTEX
GTEX-QVJO-1325-SM-2S1QX	2846.12700364757	136.059245895149	184.821032721173	92.2643452115698	418.018104512311	281.545168091251	GTEX
GTEX-QVUS-2926-SM-3GIJB	2848.92217141745	117.506964783247	154.849912896242	139.514099574066	416.518611205957	285.39395725611	GTEX
GTEX-R55E-2526-SM-2TC6H	2676.22415338169	122.500959471458	190.490875871763	51.6019547349441	656.925834246342	474.683083730612	GTEX
GTEX-R55F-1226-SM-2TF59	2838.15436105518	110.850665309386	197.285150835926	29.9294760424058	399.12058170735	314.520513211573	GTEX
GTEX-RNOR-2226-SM-2TF5O	2863.18670004364	129.87047765683	163.633403800253	102.83532521382	459.820733580441	241.195011711285	GTEX
GTEX-RU72-2926-SM-2TF66	2726.83374418928	219.357316075081	155.574772958086	100.938781760291	590.529537733409	324.97289747988	GTEX
GTEX-S7SE-2526-SM-2XCDL	2900.23870031894	82.0648714312316	191.145481179359	112.030282729108	421.126142769634	180.816492338524	GTEX
GTEX-T2IS-2926-SM-32QPO	2834.88711467696	158.380019968257	147.41007273954	107.003054402849	452.764051670895	283.232085898147	GTEX
GTEX-T5JC-2326-SM-32PMR	2865.12664396604	86.7426387329567	203.826638302376	72.3330523940602	361.910772030131	381.018071763488	GTEX
GTEX-T6MN-2526-SM-32PMN	2867.3895922995	76.8232469891896	204.425867922643	95.5753390085687	433.376309757901	244.098538583688	GTEX
GTEX-TSE9-2926-SM-3DB77	2782.40051205376	128.210663505834	195.132627889891	105.923646802368	494.868906275039	412.988171804648	GTEX
GTEX-UTHO-2926-SM-3P5Z9	2865.69799414057	83.4224234161146	221.458598234842	104.602988047087	397.709763493897	287.852401571234	GTEX
GTEX-WHSE-2926-SM-3NMBG	2819.1238766229	125.559041114489	250.674427758048	73.1786704986434	415.815147657772	396.094092949556	GTEX
GTEX-WL46-2826-SM-3LK81	2858.6139247762	125.683546130259	221.765717865319	71.7214960034161	368.7595307182	260.382257497126	GTEX
GTEX-WVLH-2926-SM-3MJG5	2874.85115130036	117.281781676095	207.68629725281	107.970084406573	418.019301680703	209.05507849535	GTEX
GTEX-WWYW-3026-SM-3NB36	2803.18687856545	136.406474811897	220.957525861403	79.9026393562689	440.450241227281	416.023523013568	GTEX
GTEX-WZTO-2826-SM-3NM8P	2869.12439845596	109.075914790197	217.511526933421	98.8847230022035	399.855386635124	293.677340781734	GTEX
GTEX-X261-3126-SM-4PQZC	2793.0311881089	118.493687305972	263.543582065842	49.4130721592961	435.215384135008	294.258479476757	GTEX
GTEX-X4EP-3026-SM-3P5YP	2682.8652652785	134.476737102471	219.811189238131	267.304415702625	435.934748310822	580.798517730152	GTEX
GTEX-X4XX-2926-SM-3NMB1	2826.08193188284	116.488651154566	228.578713676415	89.0930120089399	421.300920155387	309.443678704924	GTEX
GTEX-XLM4-2926-SM-4AT59	2813.52777764467	118.193459583748	246.7104339964	84.2331029135934	354.352898391639	427.56823534608	GTEX
GTEX-XMD1-2826-SM-4AT5F	2796.76934384669	150.188483631104	234.436266894444	83.5258980117579	411.419849247824	352.433368811494	GTEX
GTEX-XOTO-2926-SM-4B65G	2837.49177877754	118.59779493976	228.322192755914	72.2226710532778	426.86944831712	297.697954151531	GTEX
GTEX-Y111-2826-SM-4TT3O	2883.73672435791	60.068064566676	226.956947997245	58.0890562853215	384.496496079547	282.809008489437	GTEX
GTEX-Y8DK-0726-SM-4TT3S	2846.93070376373	128.010476015291	213.031831721554	123.463844031608	456.77770638577	148.81299362561	GTEX
GTEX-YFC4-3026-SM-5IFJK	2749.38557259776	207.76170463692	195.863310775623	79.6453232283509	515.915664406785	328.084593846253	GTEX
GTEX-YJ89-2926-SM-5P9IT	2894.84178403305	79.0065410397999	228.588544042248	65.1488436418646	415.339708933105	167.624474960139	GTEX
GTEX-Z93S-2826-SM-57WBL	2898.95678601329	53.8602002283062	233.237609949448	55.8002617889007	402.668907265048	222.831387875481	GTEX
GTEX-ZAB4-2926-SM-57WCV	2863.57633669519	123.881817418112	205.87296891593	104.161765618125	419.838191730162	249.126876508216	GTEX
GTEX-ZAJG-3026-SM-5HL92	2816.87873950054	121.925248065198	244.389935271876	118.636922564482	404.748337261495	320.675282810991	GTEX
GTEX-ZAK1-2926-SM-5HL9S	2856.03626409645	85.2824568149758	274.547198100029	59.4534337026722	400.051582433015	196.810943858501	GTEX
GTEX-ZUA1-2926-SM-59HL3	2855.42823626588	89.1386802079318	245.133990806667	61.4508989991483	417.815691948398	209.69565429824	GTEX
GTEX-ZVT3-2926-SM-5GU6M	2818.59097939653	162.847651653588	247.664610694385	98.5880381701687	413.694172034675	214.920962269194	GTEX
GTEX-ZYFD-2926-SM-5GID9	2841.10211289025	98.3307641022829	248.378658999262	91.7078522185382	434.335961814997	257.105988555445	GTEX
GTEX-ZYY3-3026-SM-5GIEJ	2823.25384009422	128.034147094401	235.665250179557	96.6063977008909	467.660350715175	228.864604551795	GTEX
GTEX-ZZPT-2926-SM-5EQ5S	2744.52263527852	225.379701788466	203.803880671867	136.786061327919	450.61391829381	375.758180101512	GTEX
GTEX-1117F-3226-SM-5N9CT	2821.89331216699	285.748735765233	147.78907471409	138.725797855669	464.965918277575	229.620908342739	GTEX
GTEX-111FC-3126-SM-5GZZ2	2928.06046038555	177.143768202779	110.3535230385	160.633811079555	453.121026541776	243.545583028068	GTEX
GTEX-1128S-2726-SM-5H12C	2909.58854940742	222.851410960087	109.146383796416	86.4816717316105	482.212702601849	234.641628690324	GTEX
GTEX-117XS-3026-SM-5N9CA	2963.0056866488	184.328188210882	91.5347124030612	63.8034027424355	436.939022576058	248.409606058185	GTEX
GTEX-1192X-3126-SM-5N9BY	2849.45600456263	282.4598913054	87.4359813455872	141.735684907661	489.177965888054	315.465476285768	GTEX
GTEX-11DXW-1126-SM-5H12Q	2993.08041990609	114.870793634134	130.445603297567	75.9713231088341	502.321911060034	0	GTEX
GTEX-11DXY-3226-SM-5GIDE	2900.36410701871	149.800254673072	209.866684258796	63.0991479844498	499.991271701868	218.992226920022	GTEX
GTEX-11EI6-3026-SM-5GZZO	2820.02845060347	248.597081423468	131.373250963336	126.814719674173	494.473339999131	412.968769478784	GTEX
GTEX-11EMC-3226-SM-5EGKW	2821.39360366382	318.434838574108	93.7591004120148	123.115219800249	528.135131905903	232.109802127866	GTEX
GTEX-11GS4-3126-SM-5A5LH	2917.80372079864	184.968419773214	111.16540009709	138.65548713993	456.409610690646	217.974639082734	GTEX
GTEX-11GSO-2926-SM-5HL73	2931.31805093139	213.871826562669	88.9624277608397	91.9260972085824	477.612119193955	177.930566371717	GTEX
GTEX-11GSP-3226-SM-5986O	2681.42563168865	361.304022461444	144.675726211863	219.751575362855	550.301346078812	384.624684148418	GTEX
GTEX-11NUK-2926-SM-5A5MD	2954.18021839292	177.860754478637	74.6383618508937	89.6087760212064	481.752253206655	214.152073151158	GTEX
GTEX-11NV4-2126-SM-5N9DS	2854.89830294561	264.620745948513	66.6211925057095	111.554108548444	450.812713859575	446.625005882434	GTEX
GTEX-11O72-2926-SM-5BC4V	2772.37397817419	330.404376466134	94.2510275632895	125.100661727699	522.9258651141	403.507484650364	GTEX
GTEX-11OC5-0726-SM-5P9JK	2785.50878604596	320.826508828041	103.296411626933	112.967820048466	476.536531601152	453.206737876619	GTEX
GTEX-11OF3-3126-SM-5GU5E	2959.08550356285	212.805316062907	82.2519799148133	59.8450978923657	470.99520228465	126.701645791299	GTEX
GTEX-11ONC-2926-SM-5P9JM	2834.19293354503	236.09329835983	67.6005502316223	135.155838637225	537.682675812417	397.388169645497	GTEX
GTEX-11PRG-2926-SM-5987A	2941.77085144967	205.805181963518	76.5091603848969	68.0394316437389	515.686264195353	157.478988433523	GTEX
GTEX-11TTK-2926-SM-5PNYP	2598.77824678982	450.473993216525	111.088310032326	219.691171339711	522.007837739822	636.79342687666	GTEX
GTEX-11WQK-3026-SM-5EQL6	2637.91951657461	415.655229506442	163.612290982898	187.984999974953	555.596704253814	488.316399900914	GTEX
GTEX-11ZUS-2926-SM-5FQSL	2993.73999961272	143.079209584864	99.9807443756477	53.3654420194343	450.996576303714	177.037619397756	GTEX
GTEX-12126-1026-SM-5P9JJ	2945.45868686503	193.54454689468	56.8469233792036	56.2309639541869	542.563426700267	167.951122034735	GTEX
GTEX-12WSA-2926-SM-5EQ4D	2523.38590281203	511.599517660642	135.199493763368	259.19200585108	570.894595249545	614.606655053694	GTEX
GTEX-12WSC-3026-SM-5GCNF	2958.15920852118	183.999429829497	92.0329636720128	43.3904743360325	474.03015182336	198.503137764159	GTEX
GTEX-12WSD-3126-SM-5HL7P	2819.00882127042	337.455796020642	115.028064780272	153.511307499555	497.411719577464	219.371810002493	GTEX
GTEX-12WSH-3026-SM-5CVNI	2959.05880213956	177.960129757392	97.1306790212979	91.546089047591	460.815148027389	165.227073088826	GTEX
GTEX-12ZZW-2926-SM-5LZUP	2859.1135499895	222.606336429281	123.416038212539	105.974050871228	488.149881954868	309.429516157546	GTEX
GTEX-12ZZX-2926-SM-5GCOQ	2984.22481709164	133.846903891201	113.00816030899	48.9638319913014	489.800108313708	118.330048321043	GTEX
GTEX-12ZZY-3026-SM-5GCOU	2941.88230471707	174.854083966933	109.391579643502	150.837253855689	450.182429212117	166.668066809391	GTEX
GTEX-12ZZZ-3026-SM-5BC67	2901.23357946137	250.54757879936	93.3762803186345	101.792251897726	531.261518573274	89.4720064965161	GTEX
GTEX-1313W-3126-SM-5LZUI	2990.66425751587	137.715964798135	80.5662671902214	89.4742301020467	438.335733680444	211.272534866529	GTEX
GTEX-131XW-3126-SM-5LZUC	2855.38640192938	220.646834697289	108.604992024797	114.743859302801	496.105006615011	330.218961103326	GTEX
GTEX-131YS-3126-SM-5KLYT	2963.55621839733	192.816917855847	72.1477206521054	48.7351671036926	458.567650215674	236.090283448347	GTEX
GTEX-132Q8-3026-SM-5PNVG	2685.35996742704	365.213849173402	76.1721949543816	112.10804145311	559.710710687013	631.182273690517	GTEX
GTEX-1399T-3026-SM-5KLZC	2858.63501202049	272.074619298746	75.1966930483599	103.354168146647	535.456965653861	267.772487681297	GTEX
GTEX-139T8-1026-SM-5J2MC	2734.91294616969	394.522717018352	124.553298420568	180.941385425436	533.68051800137	271.17706858304	GTEX
GTEX-13FHO-3026-SM-5J1O9	2878.2686672451	229.878830382868	85.9821806563948	166.133687888291	458.559163679541	326.599045096827	GTEX
GTEX-13FHP-3026-SM-5IJBS	2955.37566421102	167.493255529362	106.072935045466	159.644679636658	475.381106801139	125.467966596973	GTEX
GTEX-13FLW-1426-SM-5K7YE	2979.97366628147	161.395787882963	80.0813725989601	90.4038935226022	468.682747030975	133.421636781498	GTEX
GTEX-13FXS-3126-SM-5J2NN	3095.16878604051	69.433950659448	82.8963421216054	30.4607751785888	410.897196018789	57.7527641416655	GTEX
GTEX-13G51-3026-SM-5IJB8	2774.71720875612	259.385957040602	120.659882860061	275.076628040934	530.585510904623	274.120918759531	GTEX
GTEX-13IVO-2926-SM-5L3CZ	2662.17665399936	430.831875668329	127.391664371601	190.660075439924	547.364759034784	418.524774701462	GTEX
GTEX-13JUV-2926-SM-5LZX7	2735.96113479498	353.421166086164	88.898342074061	165.866553493279	510.676084692662	506.946757634495	GTEX
GTEX-13JVG-3126-SM-5L3FH	2547.49275184509	423.300393154311	151.658554103578	180.47948364256	716.323382595282	476.446034696951	GTEX
GTEX-13NYB-3026-SM-5IJD7	2945.57441805682	176.963625418365	117.47859481277	128.006115710284	469.676182186346	98.7491085822314	GTEX
GTEX-13NYC-2826-SM-5K7WR	2859.18677522064	197.539861201277	91.6586098541384	95.3999894388152	497.200635955486	467.387049990113	GTEX
GTEX-13NYS-3126-SM-5KLYV	2809.66177167229	308.529969942867	106.817990470132	118.462549946929	494.432147198886	375.21839419667	GTEX
GTEX-13O3O-3126-SM-5KM3H	2931.31591261958	175.435748813813	89.7228960460965	76.6728194100092	462.849267510878	279.94144497131	GTEX
GTEX-13O3Q-2926-SM-5KM45	2937.09835776259	175.375349342624	158.778583155261	38.5281509148496	442.021411956273	202.509151208312	GTEX
GTEX-13OVH-3026-SM-5MR4N	2968.32519594966	147.09530838855	63.4030160585245	86.3142759390331	447.9620901282	303.219278959506	GTEX
GTEX-13OVJ-2826-SM-5L3GW	2603.25875292331	467.083968622313	118.388791558464	244.115110827099	521.719307107869	571.356768028837	GTEX
GTEX-13OW6-3026-SM-5J2MI	2978.5986985662	156.646157908868	86.3551993031983	112.575544483478	459.294291919193	143.577695021429	GTEX
GTEX-13OW7-3026-SM-5L3GY	2821.22241846465	244.305880165658	277.671461783756	141.29426456202	487.840526400975	10.0420564405276	GTEX
GTEX-13OW8-2826-SM-5L3GC	2895.72905876117	211.675226833309	132.623364991568	150.438051939181	501.869399947225	105.102041929651	GTEX
GTEX-13PL6-3126-SM-5LUAR	2914.29239779971	209.357625013873	99.5032053599588	56.5768901828209	508.021734703233	203.917969070743	GTEX
GTEX-13PVQ-3026-SM-5SI93	2712.51704254334	358.48794790212	153.86101668226	195.882499308734	490.302305690772	497.146829423387	GTEX
GTEX-13QIC-2926-SM-5J2NF	2856.95187534641	256.597911605165	104.246561871637	92.5958564423266	490.268402283208	335.99920432049	GTEX
GTEX-13S7M-3126-SM-5RQJQ	2847.09744806213	274.695727207632	137.859572450423	107.863599159152	503.888043496476	203.426542123238	GTEX
GTEX-13SLX-3126-SM-5S2Q5	2972.28480696426	154.546790459612	104.264913115718	88.8992525568406	436.966856528375	172.645349705368	GTEX
GTEX-13VXU-2926-SM-5LU5C	2939.11106126546	189.37755101544	106.714066962977	54.3420093705238	504.921815898554	155.990879747489	GTEX
GTEX-13X6J-3026-SM-5Q5CU	2903.54932880148	190.011973459132	69.5400480212112	99.4891145539473	525.766825421588	274.698875316267	GTEX
GTEX-13X6K-2926-SM-5Q5D5	2779.90892135562	331.415547496732	65.7314991142365	145.420455708226	522.903972937549	448.240290458216	GTEX
GTEX-1445S-3026-SM-5O9BR	2562.32694863986	500.122243020376	96.9361198694925	253.398578533845	490.744020249853	689.517988319531	GTEX
GTEX-144FL-3026-SM-5O99C	2560.43332088992	363.912978666131	122.828181607015	389.880752630909	565.626110730312	606.802159889478	GTEX
GTEX-144GL-3026-SM-5Q5CW	2954.51789502454	151.237707607008	127.606583535763	97.8850564795832	490.123893410018	94.1771905839721	GTEX
GTEX-145LS-3126-SM-5Q5BY	2855.80614518842	234.629711473922	79.8807418021432	65.6251152786871	515.026556733963	424.580549781378	GTEX
GTEX-145MF-2726-SM-5O995	2944.57365606865	161.172009034856	98.3269647880605	85.6533192248895	451.649638424533	255.684143519452	GTEX
GTEX-145MG-3026-SM-5RQJA	2940.30572306752	153.329457581225	137.227674966755	56.5207962528534	470.958382735952	190.1262027942	GTEX
GTEX-145MH-3026-SM-5Q5DZ	3000.37483932918	174.717910625024	73.692030881965	53.9653149045926	453.924464241384	122.481271133533	GTEX
GTEX-147GR-3026-SM-5S2ML	2922.21732089811	182.583630856616	79.8762157752089	131.020494049407	476.539182581412	186.413253990769	GTEX
GTEX-14A5I-2926-SM-5Q5CQ	2937.5901751822	179.433262207033	77.3517059525113	98.085286744297	482.56821584739	223.212322700086	GTEX
GTEX-14ASI-3026-SM-5S2PN	2959.34682975267	144.846141238785	103.015369282533	71.7058794400091	533.50992450892	78.3987914904922	GTEX
GTEX-14BMV-3026-SM-5S2PQ	2983.05660090629	142.601079538431	92.3510941809457	67.4316962048207	443.060862741316	210.14751222165	GTEX
GTEX-N7MT-1126-SM-5SI7V	2674.47440235332	413.003645484377	61.977644445386	219.741598838255	466.689648212374	675.6405493804	GTEX
GTEX-NPJ7-2726-SM-2I3FT	2741.23585017152	370.680458958688	79.4556714799924	154.146500889979	615.041683566625	258.342109292812	GTEX
GTEX-NPJ8-1526-SM-2D7VU	2720.84229130384	373.803096179524	70.7771817229324	177.41594873711	470.733786343773	596.639485907273	GTEX
GTEX-OXRN-2426-SM-2I5EQ	2900.75455831375	181.946224770017	103.172838164344	124.491996596037	512.109277922448	194.684680401123	GTEX
GTEX-PVOW-2526-SM-2XCF7	3004.93002055998	170.533715659767	31.8414267154382	72.3172119031312	479.362083135928	161.172623013159	GTEX
GTEX-PWO3-0926-SM-2I5EY	2606.8158595459	423.913151660406	81.1009383946691	219.02304556426	500.82679661274	755.574754688688	GTEX
GTEX-Q2AG-2926-SM-2HMJ3	2934.16861642674	209.53034919724	83.533523529446	58.0556380848442	495.603285598478	254.902247520957	GTEX
GTEX-QDT8-2926-SM-32PKC	2862.1057817623	272.786667745355	60.3481632468969	230.73493920256	456.586007084294	255.00327103414	GTEX
GTEX-QMR6-1426-SM-32PLA	2891.15293486799	247.209615797722	49.9621607862998	168.868874915799	475.074308808557	281.229397098515	GTEX
GTEX-QVJO-1426-SM-2S1QY	2861.86930686719	263.215564045049	58.7012762123472	79.838844179233	476.011035964918	407.717605415633	GTEX
GTEX-QVUS-2826-SM-3GADB	2779.15186915545	307.919702713384	74.8403294999752	194.054215518553	493.792239237984	430.187978979572	GTEX
[truncated: 8,544 more rows]
