# Supplementary material for: A limited set of transcriptional programs define major cell types
Source: HighWire-hosted journal article supplement (doi:10.1101/gr.263186.120), 2020-07-01
Supplement: Supplemental_table_S14.xlsx [file Supplemental_table_S14.xlsx]

## Sheet: README
Table S14: Statistics on the number of reads and the mapping.

## Sheet: Table_S14
labExpId	acronym	number of reads	number of mapped reads	mapped reads (%)	number of uniquely mapped reads	uniquely mapped reads (%)	number of mapping	ratio of mapping per read	intronic coverage (%)	exonic coverage (%)	intergenic coverage (%)
ENCLB008ZZZ	HBSMC	351410442	317838546	90.45	302404086	90.45	337755570	1.07	26.9878	59.5225	4.67259
ENCLB009ZZZ	HBSMC	354406376	325876076	91.95	304070504	91.95	352962342	1.09	41.7581	67.6405	9.25933
ENCLB555AWF	HAoAF	432392262	250693362	57.98	241561770	57.98	263810416	1.06	17.3412	45.2346	4.99602
ENCLB555AXD	HAoAF	381804750	354660824	92.89	347544792	92.89	365252820	1.03	51.7303	70.7616	10.8896
ENCLB024ZZZ	HPAEC	317360438	278906220	87.88	272372326	87.88	288104840	1.04	38.2802	64.7782	5.86919
ENCLB025ZZZ	HPAEC	387514880	343134930	88.55	330145260	88.55	359676478	1.05	36.438	65.4709	6.44912
ENCLB271TJH	HPSAEpiC	167117428	145319880	86.96	141794908	86.96	149966514	1.04	16.2187	55.1551	1.97846
ENCLB473OOB	HPSAEpiC	160415152	147962822	92.24	143729586	92.24	153565722	1.04	6.29587	43.6184	0.780636
ENCLB608FPN	HRGEC	212280706	203714560	95.96	199973380	95.96	209156468	1.03	31.2383	59.2544	3.57229
ENCLB905CHP	HRGEC	177186192	170018202	95.95	166731410	95.95	174582180	1.03	12.0447	48.7158	1.43362
ENCLB301ZZZ	HTSMC	410586988	350463176	85.36	342052714	85.36	362780832	1.04	37.6932	62.8909	6.52257
ENCLB303ZZZ	HTSMC	347806522	287680874	82.71	280679164	82.71	297396426	1.04
ENCLB459IUG	HREpiC	212498676	204410768	96.19	199314962	96.19	211587496	1.04	14.2802	54.6518	1.87547
ENCLB779RPP	HREpiC	184497164	177320952	96.11	173283176	96.11	183006610	1.04	15.3484	54.6282	1.94515
ENCLB297ZZZ	HRCEpC	405603954	362332980	89.33	354684318	89.33	374081784	1.04	50.0499	72.6695	10.6955
ENCLB298ZZZ	HRCEpC	372278362	296388990	79.61	287964818	79.61	307611874	1.04	6.70074	44.0906	1.399
ENCLB555AOS	HWP	331627030	302965354	91.36	297965266	91.36	309848826	1.03	35.23	61.128	5.86653
ENCLB555ATJ	HWP	278694492	261546924	93.85	257025884	93.85	268153804	1.03	45.6216	67.0354	8.26156
ENCLB033ZZZ	HUtSMC	368655462	306080748	83.03	297110342	83.03	318499664	1.05	45.2783	68.0836	8.1198
ENCLB034ZZZ	HUtSMC	433857780	353155440	81.4	330777288	81.4	382945436	1.09	41.3556	66.8667	8.377
ENCLB016ZZZ	HDBEC	369526810	296001390	80.1	289074722	80.1	305520796	1.04	33.5372	63.2029	5.34949
ENCLB017ZZZ	HDBEC	370049996	304817272	82.37	296646304	82.37	316150122	1.04	29.4192	58.255	4.04386
ENCLB002ZZZ	HBdMEC	383005608	350481982	91.51	339062052	91.51	366665050	1.05	45.3077	67.4591	8.64819
ENCLB003ZZZ	HBdMEC	347387592	306049380	88.1	294767710	88.1	320014314	1.05	26.7485	57.9525	3.82757
ENCLB555ASC	HFDPC	237149788	215727562	90.97	211827302	90.97	221622480	1.03	36.6243	63.1316	5.76421
ENCLB555ASG	HFDPC	327708614	302728034	92.38	297193774	92.38	310963218	1.03	46.5096	68.6989	9.08584
ENCLB555ALS	HOB	414628034	383485712	92.49	377756702	92.49	392215436	1.03	42.7714	65.9117	7.80046
ENCLB555ATZ	HOB	391603658	367617932	93.87	361938486	93.87	376215776	1.03	48.5338	68.8991	9.85259
ENCLB030ZZZ	HUAEC	176481834	131201540	74.34	127293896	74.34	136405982	1.04	28.6039	56.6617	3.67777
ENCLB302ZZZ	HUAEC	401477304	349916170	87.16	335782946	87.16	367172730	1.05	21.3685	54.8718	3.14958
ENCLB555ALE	NHDF	364830572	337967970	92.64	332456674	92.64	346691850	1.03	44.9147	67.5422	8.82972
ENCLB555AMQ	NHDF	369851756	347733962	94.02	342209780	94.02	356782248	1.03	51.2467	70.3503	11.2484
ENCLB335CWF	HRMC	229698102	224094782	97.56	220004794	97.56	229805194	1.03	16.5409	56.0802	2.12416
ENCLB862KOP	HRMC	124559212	120752670	96.94	118186928	96.94	124111134	1.03	11.2455	50.3122	1.20168
ENCLB555ANL	hMSC-BM	379382210	358661762	94.54	352765726	94.54	367887444	1.03	47.3725	68.3691	9.70725
ENCLB555AVI	hMSC-BM	347988570	327137694	94.01	320700688	94.01	336748344	1.03	48.0551	68.835	9.15988
ENCLB000ZZZ	HAoSMC	388212562	353274618	91	342192602	91	368276700	1.05	46.5413	69.7245	9.70434
ENCLB001ZZZ	HAoSMC	366814002	299388140	81.62	287450210	81.62	314343590	1.05	40.2386	68.1848	7.85912
ENCLB470CZF	HHFK	172148316	166157900	96.52	162254744	96.52	171508218	1.04	9.1057	48.4288	1.09884
ENCLB764KEB	HHFK	174406416	167493234	96.04	162831158	96.04	173609824	1.04	7.57199	46.8997	0.947812
ENCLB022ZZZ	HNEpC	424359438	381718554	89.95	371827726	89.95	396055220	1.04	49.465	72.4146	11.2332
ENCLB023ZZZ	HNEpC	362536574	334846864	92.36	323352396	92.36	349169968	1.05	28.8048	62.8271	4.84497
ENCLB177URQ	HpcF	246088416	232267048	94.38	226668412	94.38	239803560	1.04	5.38873	44.7522	0.852836
ENCLB922RHX	HpcF	237999126	225894454	94.91	220610632	94.91	232623406	1.03	5.93482	46.2791	0.853978
ENCLB024PXV	HRPTEpiC	198628636	172126396	86.66	167444332	86.66	178198304	1.04	10.2026	51.7451	1.26253
ENCLB193IVT	HRPTEpiC	205546380	185547276	90.27	179668800	90.27	193445930	1.05	8.98844	48.2578	1.06832
ENCLB012ZZZ	HCASMC	397692530	315723600	79.39	289818008	79.39	348711644	1.11	17.6222	49.9072	2.82269
ENCLB013ZZZ	HCASMC	368722692	330154986	89.54	315586022	89.54	348504920	1.06	37.0723	66.0087	6.40955
ENCLB014ZZZ	HCM	407534874	361868992	88.79	353413872	88.79	373478782	1.04	31.5597	62.5813	5.4286
ENCLB015ZZZ	HCM	390044664	335022984	85.89	326161056	85.89	346555378	1.04	32.6343	63.5885	5.19644
ENCLB026ZZZ	HPASMC	309883524	265191864	85.58	259725094	85.58	273229542	1.04	45.0665	69.4743	8.43738
ENCLB027ZZZ	HPASMC	406553290	364061848	89.55	356743718	89.55	374280242	1.03
ENCLB333MHE	HBF	142936980	138917024	97.19	134597492	97.19	144440044	1.04	7.81171	48.3934	0.969116
ENCLB463QPI	HBF	219945014	214556628	97.55	207417102	97.55	223565620	1.05	8.96616	50.9041	1.14707
ENCLB555ASX	HCH	359614676	340380464	94.65	334661068	94.65	349512026	1.03	53.7196	72.2954	12.5854
ENCLB555AXA	HCH	428839828	400654768	93.43	393035910	93.43	412924074	1.04	50.6946	70.6798	11.2715
ENCLB018ZZZ	HDLEC	399939980	368777518	92.21	357666432	92.21	383238492	1.04	39.176	66.1178	7.20917
ENCLB019ZZZ	HDLEC	441791288	392282748	88.79	372492348	88.79	416276180	1.07	34.0067	64.5393	5.89426
ENCLB010ZZZ	HCAEC	391680880	363249434	92.74	346368584	92.74	384744488	1.06	41.8869	66.2171	7.05993
ENCLB011ZZZ	HCAEC	415799672	370900380	89.2	348777318	89.2	398703398	1.08	39.5636	66.0061	7.5667
ENCLB028ZZZ	HPF	395263046	344845506	87.24	332840880	87.24	359832248	1.05	38.6668	67.8573	6.98969
ENCLB029ZZZ	HPF	416631980	365877366	87.82	342709928	87.82	394825486	1.08	46.5367	71.0942	9.37262
ENCLB479DJM	HMSMC	159031802	151913436	95.52	148426152	95.52	156503980	1.04	2.48739	37.9761	0.403145
ENCLB785VXK	HMSMC	163833166	157387388	96.07	153384794	96.07	162658760	1.04	4.71942	43.1852	0.639755
ENCLB006ZZZ	HBEpC	360140668	301672454	83.77	277605508	83.77	332079050	1.11	30.4754	59.9632	5.08658
ENCLB007ZZZ	HBEpC	289438206	265460758	91.72	251569832	91.72	283037142	1.07	39.0466	66.2587	7.82086
ENCLB295ZZZ	HPMEC	417485326	369032702	88.39	349429104	88.39	392530546	1.07	36.4839	64.0498	5.83928
ENCLB296ZZZ	HPMEC	396217794	358792206	90.55	342463784	90.55	377850226	1.06	29.5151	62.5169	4.66116
ENCLB555AQE	HPlEpC	289570394	271970112	93.92	266739444	93.92	279838966	1.03	32.1599	59.5562	5.68604
ENCLB555AQF	HPlEpC	339961026	310174772	91.24	304277640	91.24	318679178	1.03	37.3172	63.2701	7.98587
ENCLB555AVZ	NHEM_M2	291361964	267118692	91.68	262927236	91.68	272861976	1.03	32.9022	59.0089	4.70571
ENCLB555ALL	NHEM_M2	282593222	261138180	92.41	256997692	92.41	267102454	1.03	36.8601	61.4222	5.88021
ENCLB555AMU	NHEM_M2	302897598	279423316	92.25	275767594	92.25	284680408	1.02	31.0775	59.1879	5.2551
ENCLB555APG	NHEM_M2	264977274	248106274	93.63	244757542	93.63	253196204	1.03	40.6287	63.8137	6.73565
ENCLB555APQ	SkMC	408918192	360185202	88.08	351187954	88.08	372110638	1.04	24.8301	56.3301	4.44304
ENCLB555ATT	SkMC	440938092	382043900	86.64	374248026	86.64	393014244	1.03	28.5438	56.955	5.63917
ENCLB020ZZZ	HDMEC	452853910	416255130	91.92	399320486	91.92	436370086	1.05	33.1732	63.9905	5.41451
ENCLB021ZZZ	HDMEC	440868926	386486672	87.66	376798742	87.66	399311788	1.04	38.7166	66.1176	6.70415
ENCLB004ZZZ	HBdSMC	391754452	356188114	90.92	339433090	90.92	376455238	1.06	43.0352	68.9867	9.77577
ENCLB005ZZZ	HBdSMC	338902292	314709950	92.86	304029842	92.86	328640950	1.05	41.6513	68.596	7.74166
ENCLB555ALM	HPC-PL	334948882	316715656	94.56	309592856	94.56	326484362	1.04	42.4381	65.024	8.04563
ENCLB555ALN	HPC-PL	258192768	221287508	85.71	215042204	85.71	229855582	1.04	37.7226	63.9337	6.74544
ENCLB151QMJ	HCF-aa	180056882	167520870	93.04	163954528	93.04	172430832	1.03	5.22063	39.9477	0.64021
ENCLB799ASI	HCF-aa	164698868	157046800	95.35	154120904	95.35	161042910	1.03	6.43306	42.9684	0.843188
ENCLB260JQO	HEMEC	176097144	170310274	96.71	166137800	96.71	175837002	1.04	4.39256	38.9209	0.536444
ENCLB925VWI	HEMEC	149273962	143224744	95.95	139173178	95.95	148476502	1.04	2.62112	35.074	0.35311
ENCLB031ZZZ	HUASMC	258868760	204497228	79	198545118	79	212300764	1.04	35.2295	62.6273	5.48433
ENCLB032ZZZ	HUASMC	350841180	296654746	84.56	290777320	84.56	305378730	1.03	44.5415	67.5562	8.0896
ENCLB088PVJ	HPAEpiC	163585024	153242906	93.68	148991912	93.68	159114936	1.04	12.2116	47.8307	1.99446
ENCLB755HPY	HPAEpiC	239421004	222996146	93.14	218303842	93.14	229132822	1.03	12.3031	52.2495	1.49832
ENCLB555ARK	hMSC-UC	252975416	243283628	96.17	238183582	96.17	250475698	1.03	45.0043	67.5359	7.70384
ENCLB555AUM	hMSC-UC	221943840	208468834	93.93	203630094	93.93	215543706	1.04	42.8998	67.4293	6.83128
ENCLB311NPN	HMMEC	188947390	181151108	95.87	176395430	95.87	187354068	1.04	10.9265	48.6931	1.16985
ENCLB652XFG	HMMEC	219030690	210245420	95.99	204832716	95.99	217316794	1.04	8.63372	46.4535	0.974514
ENCLB555ALW	HVMF	418034188	393307566	94.09	387578450	94.09	401533522	1.03	40.1646	64.175	7.29622
ENCLB555ANB	HVMF	412796108	382097468	92.56	375636892	92.56	391494880	1.03	46.885	68.0352	10.3802
ENCLB594YLU	HCF-av	146534458	141422062	96.51	138974732	96.51	144801806	1.03	13.6119	48.6075	1.78014
ENCLB915CSO	HCF-av	196633710	190222592	96.74	186722002	96.74	195037170	1.03	14.7224	49.3299	1.91512
ENCLB299ZZZ	HTEpC	379383518	275450658	72.6	268394308	72.6	285165236	1.04	14.9881	51.8945	3.3767
ENCLB300ZZZ	HTEpC	423193862	287309556	67.89	278730990	67.89	299040792	1.05	11.784	47.6033	2.46186
ENCLB555ALD	HAoEC	355647696	332772784	93.57	326037120	93.57	342858828	1.04	45.6588	65.9883	8.58886
ENCLB555AQY	HAoEC	351945034	332320934	94.42	325927418	94.42	342011108	1.03	48.945	68.0548	9.65
ENCLB555ALU	hMSC-AT	234515542	222650726	94.94	218235770	94.94	228862052	1.03	39.7028	64.19	6.59402
ENCLB555ATX	hMSC-AT	315161234	297601008	94.43	292520900	94.43	305763694	1.03	51.0063	70.2252	10.5328
ENCLB555ARL	HSaVEC	245247362	232265136	94.71	228440084	94.71	237859534	1.03	35.7453	61.422	5.79518
ENCLB555ARM	HSaVEC	265587610	247583542	93.22	242756582	93.22	254643664	1.03	42.6452	65.4797	7.58539
